# Supplementary material
Source: Research Square preprint supplement (doi:10.21203/rs.3.rs-9052961/v1)
Supplement: Supplementary file 1 [file 98a0c45229957ace81799bd8.pdf]

# Supplementary materials for

## **Mouse embryonic stem cells exhibit cancer-like DNA methylation landscapes upon DNMT1 overexpression**

Elizabeth Elder et al.

Corresponding author email: [serge.mcgraw@umontreal.ca](mailto:serge.mcgraw@umontreal.ca)

### **This PDF file includes:**

Figures S1 to S2

Tables S1 to S3

### **Other supplementary materials for this manuscript include the following:**

Data S1 to S7

Ponceau S staining

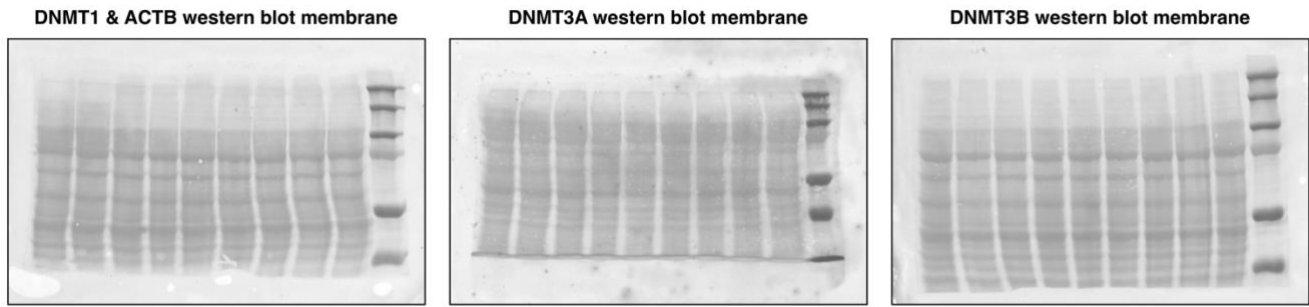

Order of wells :

Wild-type mESCs (replicate 1-3), *Dnmt1<sup>tet/tet</sup>* mESCs (replicate 1-3), doxycycline-treated *Dnmt1<sup>tet/tet</sup>* mESCs (replicate 1-3), Ladder

**Figure S1.** Perturbation of the DNA methylation machinery in *Dnmt1<sup>tet/tet</sup>* mESCs. Images of Ponceau S staining of western blot membranes used for normalizing the quantification of band intensities. Related to Figure 1 and Data S2.



| Genomic annotation | <i>Dnmt1</i> <sup>tet/tet</sup> differentially methylated regions (DMRs) |                |                             |
|--------------------|--------------------------------------------------------------------------|----------------|-----------------------------|
|                    | Hypermethylated                                                          | Hypomethylated | Persistent hypermethylation |
| Genome wide        | 4,303                                                                    | 81,144         | 1,708                       |
| Core promoters     | 2,536                                                                    | 2,307          | 1,232                       |
| Proximal promoters | 673                                                                      | 1,952          | 284                         |
| Distal promoters   | 38                                                                       | 1,095          | 16                          |
| Gene bodies        | 589                                                                      | 28,544         | 95                          |
| Intergenic         | 467                                                                      | 47,246         | 81                          |
| CpG islands        | 3,426                                                                    | 440            | 1,631                       |
| CGI shores         | 97                                                                       | 4,605          | 34                          |
| CGI shelves        | 43                                                                       | 2,268          | 3                           |
| Open sea           | 737                                                                      | 73,831         | 40                          |
| Imprinted regions  | 2                                                                        | 15             | 0                           |
| Retrotransposons   | 383                                                                      | 32,778         | 5                           |

**Table S1.** Number of *Dnmt1*<sup>tet/tet</sup> DMRs by genomic annotation that were either hypermethylated or hypomethylated and that showed persistent hypermethylation. Persistent hypermethylation: hypermethylated DMRs showing a sustained increase in DNA methylation  $\geq 10\%$  in doxycycline-treated *Dnmt1*<sup>tet/tet</sup> mESCs. Related to Figures 2 and 5.

| Human cell/tissue type                    | Sex    | <i>Dnmt1</i> <sup>tet/tet</sup> hypermethylated promoter DMRs |                 |                |
|-------------------------------------------|--------|---------------------------------------------------------------|-----------------|----------------|
|                                           |        | Mapped                                                        | Hypermethylated | Hypomethylated |
| Gastric intestinal metaplasia (GIM)       | Male   | 3,149                                                         | 430 (14%)       | 9 (0.3%)       |
| Gastric dysplasia (GD)                    |        |                                                               | 436 (14%)       | 20 (0.6%)      |
| Gastric adenocarcinoma (GAC)              |        |                                                               | 537 (17%)       | 16 (0.5%)      |
| Prostate cancer cell line LNCaP (LNCaP)   | Male   | 3,171                                                         | 278 (9%)        | 22 (0.7%)      |
| Prostate cancer cell line PC3 (PC3)       | Male   | 3,128                                                         | 648 (21%)       | 631 (20%)      |
| Prostate adenocarcinoma (PRAD)            | Male   | 3,171                                                         | 151 (5%)        | 8 (0.3%)       |
| Hepatocellular carcinoma (HCC)            | Male   | 3,171                                                         | 291 (9%)        | 23 (0.7%)      |
| Renal cell carcinoma (RCC)                | Male   | 3,171                                                         | 131 (4%)        | 2 (0.1%)       |
| Pancreatic ductal adenocarcinoma (PDAC)   | Male   | 3,167                                                         | 329 (10%)       | 19 (0.6%)      |
| Breast cancer cell line MCF-7 (MCF-7)     | Female | 2,915                                                         | 687 (24%)       | 358 (12%)      |
| Breast cancer cell line HCC1954 (HCC1954) | Female | 3,116                                                         | 468 (15%)       | 13 (0.4%)      |
| Cervical cancer (CC)                      | Female | 3,141                                                         | 157 (5%)        | 8 (0.3%)       |
| Hepatocellular carcinoma (HCC)            | Female | 3,136                                                         | 182 (6%)        | 63 (2%)        |
| Renal cell carcinoma (RCC)                | Female | 3,141                                                         | 36 (1%)         | 8 (0.3%)       |
| Glioblastoma (GBM)                        | Female | 3,140                                                         | 169 (5%)        | 6 (0.2%)       |

**Table S2.** Number of human genomic regions corresponding to the *Dnmt1*<sup>tet/tet</sup> hypermethylated promoter DMRs that were mapped and that were either hypermethylated or hypomethylated in various male and female human cancer samples. See also Data S7. Related to Figures 6 and 7.

| Sample  | GIM | GD  | GAC | LNCaP | PC3 | PRAD | HCC (M) | RCC (M) | PDAC | MCF-7 | HCC1954 | CC  | HCC (F) | RCC (F) | GBM |
|---------|-----|-----|-----|-------|-----|------|---------|---------|------|-------|---------|-----|---------|---------|-----|
| GIM     | 406 | 381 | 398 | 137   | 368 | 96   | 168     | 95      | 232  | 244   | 270     | 122 | 73      | 15      | 97  |
| GD      | 381 | 431 | 413 | 136   | 385 | 93   | 168     | 94      | 237  | 248   | 281     | 126 | 78      | 17      | 94  |
| GAC     | 398 | 413 | 513 | 163   | 447 | 107  | 189     | 97      | 257  | 290   | 318     | 133 | 90      | 19      | 102 |
| LNCaP   | 137 | 136 | 163 | 277   | 174 | 115  | 124     | 69      | 118  | 177   | 203     | 58  | 63      | 20      | 76  |
| PC3     | 368 | 385 | 447 | 174   | 633 | 112  | 200     | 103     | 252  | 303   | 328     | 131 | 101     | 23      | 113 |
| PRAD    | 96  | 93  | 107 | 115   | 112 | 148  | 83      | 48      | 84   | 107   | 131     | 41  | 39      | 15      | 48  |
| HCC (M) | 168 | 168 | 189 | 124   | 200 | 83   | 288     | 80      | 132  | 154   | 181     | 66  | 91      | 19      | 80  |
| RCC (M) | 95  | 94  | 97  | 69    | 103 | 48   | 80      | 129     | 86   | 90    | 103     | 49  | 47      | 23      | 58  |
| PDAC    | 232 | 237 | 257 | 118   | 252 | 84   | 132     | 86      | 325  | 182   | 209     | 98  | 64      | 18      | 83  |
| MCF-7   | 244 | 248 | 290 | 177   | 303 | 107  | 154     | 90      | 182  | 687   | 284     | 108 | 76      | 19      | 90  |
| HCC1954 | 270 | 281 | 318 | 203   | 328 | 131  | 181     | 103     | 209  | 284   | 468     | 123 | 87      | 22      | 99  |
| CC      | 122 | 126 | 133 | 58    | 131 | 41   | 66      | 49      | 98   | 108   | 123     | 157 | 36      | 11      | 44  |
| HCC (F) | 73  | 78  | 90  | 63    | 101 | 39   | 91      | 47      | 64   | 76    | 87      | 36  | 182     | 14      | 43  |
| RCC (F) | 15  | 17  | 19  | 20    | 23  | 15   | 19      | 23      | 18   | 19    | 22      | 11  | 14      | 36      | 22  |
| GBM     | 97  | 94  | 102 | 76    | 113 | 48   | 80      | 58      | 83   | 90    | 99      | 44  | 43      | 22      | 169 |

**Table S3.** Number of regions of conserved *Dnmt1*<sup>tet/tet</sup> promoter hypermethylation that were shared between different human cancer samples. Regions on chromosomes X and Y were not included in this analysis. M: male, F: female. See also Table S2. Related to Figure 7.
