# Supplementary material
Source: Research Square preprint supplement (doi:10.21203/rs.3.rs-9052961/v1)
Supplement: Supplementary file 1 [file ab24c7333a68562a4db64f0e.xlsx]

## Sheet: Data S1
Data S1. Differentially expressed genes in Dnmt1tet/tet and dox-treated Dnmt1tet/tet versus wild-type mESCs (related to Figures 1 and 3)
Dnmt1tet/tet vs wild-type mESCs						Dox-treated Dnmt1tet/tet vs wild-type mESCs
Ensembl ID	Gene ID	Symbol	Log2 fold change	Adjusted p-value		Ensembl ID	Gene ID	Symbol	Log2 fold change	Adjusted p-value
ENSMUSG00000106847	353342	Peg13	-9.59693	9.93551e-13		ENSMUSG00000024502	76217	Jakmip2	-7.99421	9.86203e-12
ENSMUSG00000030762	11833	Aqp8	-7.20108	1.08023e-09		ENSMUSG00000028262	80797	Clca3a2	-7.29611	2.81441e-07
ENSMUSG00000007655	12389	Cav1	-7.01815	1.08604e-06		ENSMUSG00000022425	18606	Enpp2	-7.0946	1.47634e-21
ENSMUSG00000038402	14238	Foxf2	-6.96339	6.21588e-07		ENSMUSG00000035783	11475	Acta2	-6.75052	6.28309e-61
ENSMUSG00000074195	99709	Clca4b	-6.1556	2.77243e-07		ENSMUSG00000032085	21345	Tagln	-6.68951	6.69356e-93
ENSMUSG00000000031	14955	H19	-5.92051	4.39139e-130		ENSMUSG00000004099	13433	Dnmt1	-6.58813	0
ENSMUSG00000037440	22361	Vnn1	-5.7322	5.62815e-11		ENSMUSG00000074195	99709	Clca4b	-6.25062	1.70825e-07
ENSMUSG00000023885	21826	Thbs2	-5.40692	1.06817e-09		ENSMUSG00000027985	16842	Lef1	-5.7486	2.70187e-30
ENSMUSG00000069045	26900	Ddx3y	-5.31293	0		ENSMUSG00000027376	192212	Prom2	-5.71084	5.83216e-19
ENSMUSG00000068457	22290	Uty	-5.26781	0		ENSMUSG00000068196	12837	Col8a1	-5.55563	4.04868e-06
ENSMUSG00000024529	16948	Lox	-4.90882	5.17164e-08		ENSMUSG00000007655	12389	Cav1	-5.13375	2.25192e-05
ENSMUSG00000069049	26908	Eif2s3y	-4.89718	0		ENSMUSG00000057454	72434	Lypd3	-5.02498	2.42734e-05
ENSMUSG00000069053	22202	Uba1y	-4.89367	7.04513e-49		ENSMUSG00000014773	13388	Dll1	-4.96914	2.26636e-154
ENSMUSG00000020176	14783	Grb10	-4.85792	0		ENSMUSG00000028786	66260	Tmem54	-4.95395	5.90474e-22
ENSMUSG00000044976	546144	Wdr72	-4.80348	0.00030216		ENSMUSG00000021453	23882	Gadd45g	-4.82817	8.31575e-42
ENSMUSG00000026726	65969	Cubn	-4.75377	0		ENSMUSG00000028270	14469	Gbp2	-4.81688	1.12835e-07
ENSMUSG00000028270	14469	Gbp2	-4.73288	2.07485e-07		ENSMUSG00000038980	271887	Rbbp8nl	-4.72552	1.32879e-14
ENSMUSG00000031410	170722	Nxf7	-4.60108	9.08042e-55		ENSMUSG00000000673	107766	Haao	-4.6442	1.15037e-05
ENSMUSG00000029195	83379	Klb	-4.59977	1.35086e-38		ENSMUSG00000008193	272382	Spib	-4.59585	1.60305e-19
ENSMUSG00000022425	18606	Enpp2	-4.52326	1.31193e-37		ENSMUSG00000035491	71996	Fthl17a	-4.56187	1.66385e-08
ENSMUSG00000031963	73230	Bmper	-4.51594	2.15865e-21		ENSMUSG00000068154	53626	Insm1	-4.50062	2.22389e-40
ENSMUSG00000035783	11475	Acta2	-4.49989	7.95211e-88		ENSMUSG00000052234	13861	Epx	-4.464	2.37802e-07
ENSMUSG00000020077	19073	Srgn	-4.48243	3.62251e-98		ENSMUSG00000023885	21826	Thbs2	-4.35707	9.29816e-12
ENSMUSG00000051022	15476	Hs3st1	-4.46596	2.9933e-23		ENSMUSG00000040264	14468	Gbp2b	-4.31445	2.65313e-06
ENSMUSG00000028364	21923	Tnc	-4.40672	0.000165753		ENSMUSG00000043144	11831	Aqp6	-4.31257	3.73513e-15
ENSMUSG00000024354	20522	Slc23a1	-4.36648	4.92491e-99		ENSMUSG00000003053	13095	Cyp2c29	-4.30409	4.73043e-05
ENSMUSG00000040152	21825	Thbs1	-4.32688	7.19019e-143		ENSMUSG00000061353	20315	Cxcl12	-4.29888	9.47488e-09
ENSMUSG00000068154	53626	Insm1	-4.31455	5.22196e-39		ENSMUSG00000021702	21828	Thbs4	-4.2834	2.07185e-06
ENSMUSG00000056888	73690	Glipr1	-4.31454	3.8858e-09		ENSMUSG00000031342	14758	Gpm6b	-4.2719	1.14781e-10
ENSMUSG00000097222	68434	1010001N08Rik	-4.20164	3.18845e-06		ENSMUSG00000000805	12351	Car4	-4.24088	1.24667e-109
ENSMUSG00000045027	70835	Prss22	-4.19246	2.95272e-07		ENSMUSG00000032493	73336	Prss44	-4.16005	1.39322e-15
ENSMUSG00000020052	17172	Ascl1	-4.16321	0.000109139		ENSMUSG00000040706	75986	Agmat	-4.07576	0.000465288
ENSMUSG00000034738	329416	Nostrin	-4.16087	3.39318e-17		ENSMUSG00000001349	12797	Cnn1	-4.0362	6.38599e-21
ENSMUSG00000025075	226243	Habp2	-4.15186	1.29729e-08		ENSMUSG00000075296	621603	Aldh3b2	-4.01802	1.01558e-05
ENSMUSG00000068196	12837	Col8a1	-4.15127	7.81536e-06		ENSMUSG00000038526	23831	Car14	-4.00202	1.16033e-12
ENSMUSG00000105734	67654	4930558C23Rik	-4.12545	0.00115621		ENSMUSG00000030491	71981	Tdrd12	-3.97654	0
ENSMUSG00000086503	213742	Xist	-4.12248	9.46418e-15		ENSMUSG00000078566	12176	Bnip3	-3.97063	6.532e-202
ENSMUSG00000020053	16000	Igf1	-4.02538	4.06241e-08		ENSMUSG00000081058	97114	Hist2h3c2	-3.96906	1.08054e-13
ENSMUSG00000044176	328971	Spink10	-3.89188	1.15752e-13		ENSMUSG00000066721	101544	Zfp575	-3.96505	7.89014e-10
ENSMUSG00000029231	18595	Pdgfra	-3.84859	2.31414e-136		ENSMUSG00000049115	11607	Agtr1a	-3.96377	2.70771e-09
ENSMUSG00000026043	12825	Col3a1	-3.83364	4.47438e-05		ENSMUSG00000056025	12722	Clca3a1	-3.94634	2.12094e-05
ENSMUSG00000031343	14396	Gabra3	-3.70839	5.43743e-06		ENSMUSG00000020176	14783	Grb10	-3.93775	0
ENSMUSG00000024803	107765	Ankrd1	-3.678	1.19678e-05		ENSMUSG00000052131	11997	Akr1b7	-3.93537	2.19175e-06
ENSMUSG00000038415	15220	Foxq1	-3.66958	8.6179e-54		ENSMUSG00000049109	210757	Themis	-3.92697	2.03005e-10
ENSMUSG00000029553	21426	Tfec	-3.65714	9.80554e-07		ENSMUSG00000026043	12825	Col3a1	-3.92308	2.79378e-05
ENSMUSG00000017607	217169	Tns4	-3.61692	3.05891e-22		ENSMUSG00000043782	212733	Bicdl2	-3.92258	1.11154e-28
ENSMUSG00000038168	210530	P3h2	-3.60928	2.17758e-13		ENSMUSG00000024155	75178	Meiob	-3.91567	4.40113e-24
ENSMUSG00000055737	14600	Ghr	-3.58818	2.18397e-23		ENSMUSG00000024529	16948	Lox	-3.87914	6.39572e-09
ENSMUSG00000014773	13388	Dll1	-3.58006	1.42496e-142		ENSMUSG00000043017	19222	Ptgir	-3.84654	2.24065e-09
ENSMUSG00000021453	23882	Gadd45g	-3.46045	1.1176e-38		ENSMUSG00000043003	242505	Rasef	-3.82295	6.0566e-16
ENSMUSG00000061186	353282	Sfmbt2	-3.44134	0		ENSMUSG00000003341	67331	Atp8b3	-3.80948	3.2648e-42
ENSMUSG00000032085	21345	Tagln	-3.41568	1.34857e-116		ENSMUSG00000038216	18948	Pnmt	-3.80373	0.000264845
ENSMUSG00000079012	20717	Serpina3m	-3.39283	3.93375e-07		ENSMUSG00000046323	73708	Dppa3	-3.79321	1.49244e-50
ENSMUSG00000039405	76453	Prss23	-3.38832	6.11412e-21		ENSMUSG00000029650	71706	Slc46a3	-3.74492	3.19649e-27
ENSMUSG00000027376	192212	Prom2	-3.36936	1.21987e-19		ENSMUSG00000005553	11944	Atp4a	-3.70025	1.21946e-40
ENSMUSG00000054727	75514	1700013H16Rik	-3.35642	0.000550712		ENSMUSG00000032269	15561	Htr3a	-3.67029	3.57743e-05
ENSMUSG00000022150	13132	Dab2	-3.3504	7.01297e-176		ENSMUSG00000033737	333564	Fndc3c1	-3.65643	5.35047e-44
ENSMUSG00000022113	212085	Trim52	-3.30798	1.03368e-104		ENSMUSG00000024503	20730	Spink1	-3.63621	4.02954e-47
ENSMUSG00000022367	15117	Has2	-3.29725	3.14244e-33		ENSMUSG00000028417	21350	Tal2	-3.62523	1.51336e-10
ENSMUSG00000025902	20671	Sox17	-3.2551	2.44365e-37		ENSMUSG00000041633	207474	Kctd12b	-3.62346	1.30879e-08
ENSMUSG00000043003	242505	Rasef	-3.25255	3.2213e-14		ENSMUSG00000052435	110794	Cebpe	-3.59174	4.01354e-05
ENSMUSG00000024479	105853	Mal2	-3.23194	6.77285e-13		ENSMUSG00000013483	170720	Card14	-3.58516	1.8203e-05
ENSMUSG00000027985	16842	Lef1	-3.22341	3.09517e-29		ENSMUSG00000017607	217169	Tns4	-3.53845	9.0506e-23
ENSMUSG00000072249	434729	Fthl17f	-3.19122	2.01634e-07		ENSMUSG00000023826	50873	Park2	-3.53797	2.36516e-44
ENSMUSG00000024659	16952	Anxa1	-3.16919	7.38417e-65		ENSMUSG00000045027	70835	Prss22	-3.53348	2.04178e-07
ENSMUSG00000028115	171388	Bnipl	-3.15286	6.54229e-60		ENSMUSG00000039103	68810	Nexn	-3.53006	1.37405e-35
ENSMUSG00000022783	50525	Spag6l	-3.14437	7.75812e-12		ENSMUSG00000022408	213956	Fam83f	-3.52876	2.35422e-18
ENSMUSG00000031972	11459	Acta1	-3.07886	1.32348e-09		ENSMUSG00000089804	105245924	Gm16136	-3.49313	3.09476e-05
ENSMUSG00000037887	18218	Dusp8	-3.04892	8.38781e-24		ENSMUSG00000011349	71241	Dmrtc2	-3.47858	1.0545e-14
ENSMUSG00000005836	14465	Gata6	-3.0184	4.48698e-105		ENSMUSG00000054675	231633	Tmem119	-3.47183	7.18528e-05
ENSMUSG00000046532	11835	Ar	-2.99454	2.11093e-08		ENSMUSG00000022367	15117	Has2	-3.44015	2.61689e-35
ENSMUSG00000044288	12801	Cnr1	-2.99277	4.16824e-11		ENSMUSG00000049620	353130	Prss33	-3.4134	9.27491e-09
ENSMUSG00000029189	231238	Sel1l3	-2.99259	2.39125e-12		ENSMUSG00000028865	69655	Cd164l2	-3.39422	1.7496e-17
ENSMUSG00000031179	70696	3830417A13Rik	-2.99152	4.5635e-12		ENSMUSG00000094447	77358	9430069I07Rik	-3.38682	2.75941e-23
ENSMUSG00000020057	71712	Dram1	-2.97152	8.61653e-28		ENSMUSG00000031111	209268	Igsf1	-3.38075	1.74073e-37
ENSMUSG00000058571	23888	Gpc6	-2.94618	1.78203e-19		ENSMUSG00000020052	17172	Ascl1	-3.37595	6.64516e-05
ENSMUSG00000030256	79362	Bhlhe41	-2.94502	1.61396e-43		ENSMUSG00000073409	110557	H2-Q6	-3.36287	6.06514e-12
ENSMUSG00000031503	12827	Col4a2	-2.94245	0		ENSMUSG00000078815	54378	Cacng6	-3.36236	4.46347e-72
ENSMUSG00000056673	20592	Kdm5d	-2.93632	0.00209582		ENSMUSG00000086171	378776	Pcsk2os1	-3.3554	2.77382e-08
ENSMUSG00000091705	15013	H2-Q2	-2.93233	3.91756e-13		ENSMUSG00000027188	210622	Pamr1	-3.32738	1.02764e-09
ENSMUSG00000096606	100503386	Tpbgl	-2.92218	1.8363e-07		ENSMUSG00000107585	70230	3300002P13Rik	-3.32457	5.57391e-10
ENSMUSG00000026768	241226	Itga8	-2.91579	1.00067e-69		ENSMUSG00000037664	12577	Cdkn1c	-3.31517	0
ENSMUSG00000056025	12722	Clca3a1	-2.90892	8.30468e-05		ENSMUSG00000020886	13385	Dlg4	-3.30509	7.65668e-89
ENSMUSG00000024887	54447	Asah2	-2.89634	2.77487e-06		ENSMUSG00000040152	21825	Thbs1	-3.30441	2.25649e-127
ENSMUSG00000023959	224796	Clic5	-2.89509	8.22534e-14		ENSMUSG00000045019	171168	Acer1	-3.29532	1.83741e-06
ENSMUSG00000036136	104943	Fam110c	-2.88921	1.49641e-05		ENSMUSG00000063531	20349	Sema3e	-3.27503	6.12362e-171
ENSMUSG00000000197	338370	Nalcn	-2.88422	1.1435e-20		ENSMUSG00000036858	19208	Ptcra	-3.2691	0.00049122
ENSMUSG00000098678	223645	Mroh6	-2.88046	1.57807e-37		ENSMUSG00000032584	19882	Mst1r	-3.26652	4.49496e-12
ENSMUSG00000040264	14468	Gbp2b	-2.86981	1.51849e-05		ENSMUSG00000078796	666528	Zfp541	-3.26574	4.92381e-15
ENSMUSG00000021732	14165	Fgf10	-2.85323	2.50429e-27		ENSMUSG00000042436	76293	Mfap4	-3.25194	1.15237e-12
ENSMUSG00000055874	232077	Foxi3	-2.84476	5.32545e-45		ENSMUSG00000033965	20502	Slc16a2	-3.21257	6.76403e-20
ENSMUSG00000019647	20358	Sema6a	-2.83254	6.78017e-29		ENSMUSG00000097885	100039684	5031434O11Rik	-3.20423	1.44422e-07
ENSMUSG00000029859	13835	Epha1	-2.82366	1.06835e-95		ENSMUSG00000032936	235604	Camkv	-3.20371	2.93371e-172
ENSMUSG00000032327	20897	Stra6	-2.82233	1.05639e-11		ENSMUSG00000032278	74090	Paqr5	-3.19583	1.3316e-08
ENSMUSG00000027009	16401	Itga4	-2.80773	3.12804e-08		ENSMUSG00000040728	207920	Esrp1	-3.16787	0
ENSMUSG00000004508	14389	Gab2	-2.806	2.57485e-08		ENSMUSG00000044288	12801	Cnr1	-3.15181	7.0692e-12
ENSMUSG00000040728	207920	Esrp1	-2.79806	4.20643e-275		ENSMUSG00000019982	17863	Myb	-3.14737	5.09406e-48
ENSMUSG00000033965	20502	Slc16a2	-2.79355	3.50697e-17		ENSMUSG00000055235	269633	Wdr86	-3.14728	3.50746e-108
ENSMUSG00000037341	236727	Slc9a7	-2.79197	1.74282e-12		ENSMUSG00000019989	209558	Enpp3	-3.13193	0
ENSMUSG00000036782	67455	Klhl13	-2.78581	0		ENSMUSG00000028115	171388	Bnipl	-3.11992	3.63366e-61
ENSMUSG00000042961	268780	Egflam	-2.78127	3.33966e-06		ENSMUSG00000032511	20271	Scn5a	-3.10657	4.65632e-09
ENSMUSG00000032548	24059	Slco2a1	-2.76678	4.76114e-44		ENSMUSG00000085218	102640562	BB218582	-3.08671	5.61001e-07
ENSMUSG00000028539	11876	Artn	-2.76057	3.07329e-24		ENSMUSG00000052861	330355	Dnah6	-3.07308	3.59969e-62
ENSMUSG00000024109	18189	Nrxn1	-2.75744	5.33978e-06		ENSMUSG00000071235	432677	Vrtn	-3.07016	1.86286e-15
ENSMUSG00000035491	71996	Fthl17a	-2.74156	5.74809e-07		ENSMUSG00000024186	50782	Rgs11	-3.04209	1.51448e-36
ENSMUSG00000021211	622402	Akr1c12	-2.73559	0.000345738		ENSMUSG00000039838	242773	Slc45a1	-3.04095	2.55098e-17
ENSMUSG00000036856	22417	Wnt4	-2.733	8.60604e-09		ENSMUSG00000030001	26910	Figla	-3.03414	0.000121817
ENSMUSG00000029695	30956	Aass	-2.72809	2.33452e-145		ENSMUSG00000008540	56615	Mgst1	-3.03183	5.34592e-10
ENSMUSG00000031340	14404	Gabre	-2.72797	7.07168e-09		ENSMUSG00000073680	320587	Tmem88b	-3.02462	5.4773e-08
ENSMUSG00000020598	319504	Nrcam	-2.71568	1.27442e-09		ENSMUSG00000024679	68774	Ms4a6d	-2.96614	1.36027e-09
ENSMUSG00000028262	80797	Clca3a2	-2.71488	0.000112791		ENSMUSG00000020310	17123	Madcam1	-2.95487	6.21387e-16
ENSMUSG00000021944	14463	Gata4	-2.7071	3.16759e-120		ENSMUSG00000028536	66451	2610528J11Rik	-2.9517	2.08988e-12
ENSMUSG00000029314	231510	Gpat3	-2.69655	6.07615e-27		ENSMUSG00000031972	11459	Acta1	-2.91597	1.95606e-09
ENSMUSG00000024292	64385	Cyp4f14	-2.68927	7.29085e-09		ENSMUSG00000000731	11634	Aire	-2.89876	4.20672e-79
ENSMUSG00000031438	66889	Rnf128	-2.68397	4.36905e-130		ENSMUSG00000033063	238680	Cntnap3	-2.89276	1.58234e-14
ENSMUSG00000018569	53624	Cldn7	-2.68299	1.39635e-77		ENSMUSG00000028631	60613	Kcnq4	-2.87467	8.92534e-15
ENSMUSG00000079584	245423	Gm364	-2.68162	3.42389e-38		ENSMUSG00000069310	319148	Hist1h3c	-2.87301	1.61938e-11
ENSMUSG00000040969	77669	Arhgef38	-2.67623	1.21211e-86		ENSMUSG00000067878	320923	Map7d3	-2.87261	1.87912e-124
ENSMUSG00000056258	110862	Kcnq3	-2.6676	9.64826e-07		ENSMUSG00000006587	30927	Snai3	-2.87044	6.37398e-50
ENSMUSG00000030889	233813	Vwa3a	-2.66307	6.586e-05		ENSMUSG00000005131	75311	4930550C14Rik	-2.86975	1.32849e-08
ENSMUSG00000030551	11819	Nr2f2	-2.65267	0.000546888		ENSMUSG00000097493	320469	9930014A18Rik	-2.86495	2.00145e-13
ENSMUSG00000032940	224344	Rbm11	-2.62983	5.93203e-05		ENSMUSG00000020216	71912	Jsrp1	-2.86384	1.07557e-07
ENSMUSG00000039683	330222	Sdk1	-2.60279	4.31067e-07		ENSMUSG00000017943	228858	Gdap1l1	-2.84447	1.56917e-32
ENSMUSG00000091243	73569	Vgll3	-2.59041	8.33505e-28		ENSMUSG00000024354	20522	Slc23a1	-2.83244	3.14064e-72
ENSMUSG00000002107	14007	Celf2	-2.58352	1.85099e-60		ENSMUSG00000029675	13717	Eln	-2.82793	5.80744e-14
ENSMUSG00000081766	72381	2210409E12Rik	-2.58041	1.80324e-12		ENSMUSG00000028780	20348	Sema3c	-2.8279	6.16462e-15
ENSMUSG00000015085	12496	Entpd2	-2.57943	2.50427e-13		ENSMUSG00000006649	54631	Nphs1	-2.82606	0
ENSMUSG00000027358	12156	Bmp2	-2.56789	0.000123328		ENSMUSG00000024803	107765	Ankrd1	-2.81761	3.32248e-05
ENSMUSG00000017978	320405	Cadps2	-2.56021	4.16453e-18		ENSMUSG00000041552	211612	Ptchd1	-2.81099	1.60665e-08
ENSMUSG00000052131	11997	Akr1b7	-2.55578	4.31881e-05		ENSMUSG00000047963	52331	Stbd1	-2.80403	3.51309e-08
ENSMUSG00000038980	271887	Rbbp8nl	-2.53859	5.27206e-11		ENSMUSG00000052889	18751	Prkcb	-2.80152	1.49207e-45
ENSMUSG00000033343	17140	Magea4	-2.53449	0.00720823		ENSMUSG00000058028	170734	Zscan5b	-2.79764	1.9648e-14
ENSMUSG00000030849	14183	Fgfr2	-2.51587	3.59723e-79		ENSMUSG00000097021	71274	4933433G15Rik	-2.79241	1.55271e-12
ENSMUSG00000051855	17294	Mest	-2.5142	0		ENSMUSG00000031073	14170	Fgf15	-2.78725	3.27857e-88
ENSMUSG00000020467	216616	Efemp1	-2.50769	6.62483e-06		ENSMUSG00000042064	329421	Myo3b	-2.787	7.20644e-05
ENSMUSG00000039982	207521	Dtx4	-2.5051	2.9424e-71		ENSMUSG00000047797	14618	Gjb1	-2.77514	2.7014e-22
ENSMUSG00000024663	74760	Rab3il1	-2.49706	4.64313e-106		ENSMUSG00000034177	207742	Rnf43	-2.76598	2.24558e-11
ENSMUSG00000038267	73102	Slc22a23	-2.49579	4.09656e-51		ENSMUSG00000097164	67723	Cep83os	-2.76519	2.66324e-21
ENSMUSG00000008601	53868	Rab25	-2.4914	1.43783e-20		ENSMUSG00000068117	74369	Mei1	-2.76452	3.04706e-07
ENSMUSG00000028776	94242	Tinagl1	-2.48606	2.34145e-34		ENSMUSG00000022483	12824	Col2a1	-2.76026	2.34935e-52
ENSMUSG00000078796	666528	Zfp541	-2.4825	2.48588e-11		ENSMUSG00000028539	11876	Artn	-2.75396	7.93062e-25
ENSMUSG00000102752	665574	Gm7694	-2.47606	8.19793e-09		ENSMUSG00000001663	14871	Gstt1	-2.7439	2.07587e-24
ENSMUSG00000060487	320825	Samd5	-2.46107	0.000104599		ENSMUSG00000020712	75870	Tcam1	-2.74046	2.87514e-17
ENSMUSG00000022952	12394	Runx1	-2.45968	7.82915e-36		ENSMUSG00000046500	320701	Fam19a4	-2.73456	1.46044e-23
ENSMUSG00000057719	269016	Sh3rf2	-2.45311	0.000698412		ENSMUSG00000078851	319162	Hist3h2a	-2.73131	1.76915e-26
ENSMUSG00000022306	22762	Zfpm2	-2.45258	0.000567875		ENSMUSG00000057729	19152	Prtn3	-2.72181	0.00022599
ENSMUSG00000032492	19228	Pth1r	-2.45252	4.2235e-28		ENSMUSG00000024697	14675	Gna14	-2.71576	9.8931e-58
ENSMUSG00000031375	12111	Bgn	-2.45044	6.51024e-09		ENSMUSG00000074899	640524	Sptbn5	-2.70664	4.48326e-20
ENSMUSG00000075314	383709	Gm1322	-2.44857	2.54803e-05		ENSMUSG00000023011	72393	Faim2	-2.70131	3.47948e-08
ENSMUSG00000030800	76560	Prss8	-2.44434	1.87566e-63		ENSMUSG00000023153	69671	Tmem52	-2.69967	1.13728e-05
ENSMUSG00000024331	13506	Dsc2	-2.44424	4.58758e-26		ENSMUSG00000024936	16530	Kcnk7	-2.69851	0.000469142
ENSMUSG00000033446	67168	Lpar6	-2.44178	2.17887e-53		ENSMUSG00000063172	72938	Hspb11	-2.69587	3.04135e-33
ENSMUSG00000021268	17263	Meg3	-2.41878	3.18125e-86		ENSMUSG00000015090	19215	Ptgds	-2.68582	5.29401e-05
ENSMUSG00000013418	14422	B4galnt2	-2.41365	1.70126e-37		ENSMUSG00000024905	17771	Tesmin	-2.68266	1.37322e-26
ENSMUSG00000004698	79221	Hdac9	-2.40981	1.64067e-13		ENSMUSG00000020057	71712	Dram1	-2.67998	1.13918e-25
ENSMUSG00000024868	13380	Dkk1	-2.40627	3.0781e-10		ENSMUSG00000042851	78751	Zc3h6	-2.67862	8.80838e-55
ENSMUSG00000032265	212943	Fam46a	-2.38863	3.85933e-22		ENSMUSG00000016458	22431	Wt1	-2.67456	2.76752e-32
ENSMUSG00000029675	13717	Eln	-2.38838	2.20349e-11		ENSMUSG00000034701	18012	Neurod1	-2.64723	3.92581e-181
ENSMUSG00000021411	66895	Pxdc1	-2.38123	1.19423e-08		ENSMUSG00000004961	53420	Syt5	-2.62538	3.74743e-17
ENSMUSG00000039616	68591	Mocos	-2.37953	2.24925e-16		ENSMUSG00000043719	245026	Col6a6	-2.61251	4.69126e-09
ENSMUSG00000022661	17470	Cd200	-2.37749	5.74392e-09		ENSMUSG00000100210	260423	Hist1h3f	-2.60909	0.000103186
ENSMUSG00000060962	73712	Dmkn	-2.35797	3.84126e-05		ENSMUSG00000073102	381738	Drc1	-2.60476	3.07872e-24
ENSMUSG00000042118	64918	Bhmt2	-2.35571	3.13341e-07		ENSMUSG00000030067	108655	Foxp1	-2.59947	0
ENSMUSG00000030077	12661	Chl1	-2.35464	0.00455071		ENSMUSG00000030098	243547	Grip2	-2.59877	6.15601e-17
ENSMUSG00000028926	18647	Cdk14	-2.35315	2.04958e-15		ENSMUSG00000020037	71137	Rfx4	-2.59345	1.34141e-11
ENSMUSG00000047996	546336	Prrg1	-2.34867	6.15668e-16		ENSMUSG00000020059	20962	Sycp3	-2.59301	2.48238e-155
ENSMUSG00000043760	241035	Pkhd1	-2.34683	1.60719e-29		ENSMUSG00000015843	20183	Rxrg	-2.59165	7.45089e-10
ENSMUSG00000021187	74413	Tc2n	-2.34606	5.06091e-16		ENSMUSG00000028782	230775	Adgrb2	-2.58115	2.76429e-140
ENSMUSG00000027022	241431	Xirp2	-2.34428	2.65977e-07		ENSMUSG00000052565	14957	Hist1h1d	-2.5714	1.23599e-08
ENSMUSG00000065431	387181	Mir186	-2.33512	3.24686e-08		ENSMUSG00000052301	13446	Doc2a	-2.56614	1.65706e-56
ENSMUSG00000054667	16370	Irs4	-2.32873	3.44926e-23		ENSMUSG00000036687	231832	Tmem184a	-2.56596	4.30722e-18
ENSMUSG00000074489	12095	Bglap3	-2.32668	3.36805e-09		ENSMUSG00000074340	12659	Ovgp1	-2.56536	4.67241e-28
ENSMUSG00000014599	12977	Csf1	-2.32558	1.72462e-14		ENSMUSG00000030849	14183	Fgfr2	-2.56238	1.22055e-82
ENSMUSG00000036095	217480	Dgkb	-2.32309	2.29955e-09		ENSMUSG00000061740	56448	Cyp2d22	-2.54923	4.63788e-11
ENSMUSG00000031502	12826	Col4a1	-2.32129	0		ENSMUSG00000044681	269637	Cnpy1	-2.54905	2.71485e-93
ENSMUSG00000023906	54419	Cldn6	-2.30043	7.03598e-188		ENSMUSG00000089997	613264	1810020O05Rik	-2.54067	0.000187004
ENSMUSG00000074646	320095	6430550D23Rik	-2.29368	3.4533e-06		ENSMUSG00000029859	13835	Epha1	-2.53463	9.74424e-86
ENSMUSG00000020679	21410	Hnf1b	-2.28857	1.15702e-14		ENSMUSG00000056812	20451	St8sia3	-2.53363	1.02816e-05
ENSMUSG00000030310	232333	Slc6a1	-2.28515	4.39944e-90		ENSMUSG00000092300	69681	Cdk3-ps	-2.53265	5.56666e-13
ENSMUSG00000086549	100415901	Gm13648	-2.28492	1.59573e-09		ENSMUSG00000044664	235628	Prss42	-2.53023	1.71918e-43
ENSMUSG00000039782	231207	Cpeb2	-2.28146	1.07792e-61		ENSMUSG00000040146	71746	Rgl3	-2.5291	4.42072e-08
ENSMUSG00000006649	54631	Nphs1	-2.27796	0		ENSMUSG00000070564	243967	Ntn5	-2.52191	3.64046e-08
ENSMUSG00000029330	74596	Cds1	-2.27744	3.36859e-102		ENSMUSG00000029576	231858	Radil	-2.51853	1.4209e-95
ENSMUSG00000028132	99887	Tmem56	-2.27737	0.000147716		ENSMUSG00000024479	105853	Mal2	-2.51744	2.02236e-10
ENSMUSG00000028631	60613	Kcnq4	-2.27591	3.54263e-11		ENSMUSG00000053687	319446	Dpep2	-2.50156	0.000910589
ENSMUSG00000037025	15376	Foxa2	-2.27493	5.15475e-07		ENSMUSG00000075316	20274	Scn9a	-2.49506	4.87295e-08
ENSMUSG00000026994	14425	Galnt3	-2.27453	5.50784e-26		ENSMUSG00000069302	319168	Hist1h2ah	-2.48959	0.000231834
ENSMUSG00000034648	16979	Lrrn1	-2.27245	2.47483e-17		ENSMUSG00000061577	382045	Adgrg5	-2.48233	8.47314e-05
ENSMUSG00000021708	19418	Rasgrf2	-2.24714	6.37215e-05		ENSMUSG00000028464	22004	Tpm2	-2.48071	6.4107e-112
ENSMUSG00000028786	66260	Tmem54	-2.24638	6.31238e-14		ENSMUSG00000030761	17921	Myo7a	-2.48057	2.31509e-65
ENSMUSG00000040420	320865	Cdh18	-2.24342	2.66113e-05		ENSMUSG00000041134	224405	Cyyr1	-2.47814	2.50169e-62
ENSMUSG00000010044	114602	Zmynd10	-2.24174	1.09242e-11		ENSMUSG00000001249	15451	Hpn	-2.47782	3.15491e-69
ENSMUSG00000097164	67723	Cep83os	-2.23903	2.66299e-16		ENSMUSG00000025496	13491	Drd4	-2.47556	0.000331172
ENSMUSG00000033676	14402	Gabrb3	-2.23399	7.08607e-70		ENSMUSG00000036067	227659	Slc2a6	-2.46899	0.000287009
ENSMUSG00000062184	50786	Hs6st2	-2.23356	4.7033e-22		ENSMUSG00000022321	320873	Cdh10	-2.46741	2.74414e-07
ENSMUSG00000033149	208177	Phldb2	-2.22836	2.07715e-79		ENSMUSG00000024302	13527	Dtna	-2.46501	3.6401e-78
ENSMUSG00000021803	170677	Cdhr1	-2.22104	1.26742e-17		ENSMUSG00000041378	12741	Cldn5	-2.465	8.82272e-09
ENSMUSG00000074768	12116	Bhmt	-2.20626	5.79082e-07		ENSMUSG00000035258	320712	Abi3bp	-2.45435	3.69013e-07
ENSMUSG00000021725	52552	Parp8	-2.18517	4.08066e-07		ENSMUSG00000034947	217203	Tmem106a	-2.44545	2.12066e-55
ENSMUSG00000027901	72121	Dennd2d	-2.18416	1.24624e-08		ENSMUSG00000028661	13842	Epha8	-2.43779	1.50372e-16
ENSMUSG00000018217	18858	Pmp22	-2.18104	1.00575e-12		ENSMUSG00000066720	56863	Cldn9	-2.43622	2.30087e-09
ENSMUSG00000041423	68957	Paqr6	-2.17856	2.33733e-10		ENSMUSG00000022441	77627	Efcab6	-2.43531	1.64174e-05
ENSMUSG00000050424	385377	Pnma5	-2.16862	2.599e-71		ENSMUSG00000036915	243911	Kirrel2	-2.43076	2.75349e-221
ENSMUSG00000092586	68468	Ly6g6c	-2.1683	0.000215046		ENSMUSG00000030310	232333	Slc6a1	-2.4256	3.8858e-100
ENSMUSG00000036466	214058	Megf11	-2.16507	1.02987e-32		ENSMUSG00000062252	328789	Lhfpl5	-2.42087	6.20643e-05
ENSMUSG00000035498	109332	Cdcp1	-2.16259	4.30714e-29		ENSMUSG00000085614	100503636	1700123M08Rik	-2.39795	5.56351e-06
ENSMUSG00000059816	545667	Fam159a	-2.15307	7.22637e-11		ENSMUSG00000029121	12933	Crmp1	-2.39709	1.33654e-254
ENSMUSG00000027955	68659	Fam198b	-2.15243	7.20461e-87		ENSMUSG00000039405	76453	Prss23	-2.39539	1.54718e-15
ENSMUSG00000036915	243911	Kirrel2	-2.15134	3.31116e-180		ENSMUSG00000020407	22271	Upp1	-2.39529	0
ENSMUSG00000053552	228598	Ebf4	-2.14419	5.77074e-10		ENSMUSG00000031302	245537	Nlgn3	-2.39469	5.49511e-06
ENSMUSG00000072623	22750	Zfp9	-2.13607	3.04123e-05		ENSMUSG00000046367	71001	Mgat4e	-2.39445	8.61756e-06
ENSMUSG00000078307	330941	AI593442	-2.13216	0.00123849		ENSMUSG00000048965	244238	Mrgpre	-2.38975	0.000171066
ENSMUSG00000032332	12816	Col12a1	-2.12943	7.61168e-06		ENSMUSG00000027579	20811	Srms	-2.38615	1.33093e-06
ENSMUSG00000038473	70729	Nos1ap	-2.12602	7.15973e-06		ENSMUSG00000037949	102566	Ano10	-2.38182	1.22055e-38
ENSMUSG00000063415	232174	Cyp26b1	-2.12313	8.71e-07		ENSMUSG00000028327	74152	Stra6l	-2.37192	4.73731e-05
ENSMUSG00000090958	434215	Lrrc32	-2.12241	6.19752e-07		ENSMUSG00000060176	75050	Kif27	-2.36936	3.31328e-08
ENSMUSG00000097021	71274	4933433G15Rik	-2.12122	3.90005e-09		ENSMUSG00000054342	16534	Kcnn4	-2.36568	1.36945e-12
ENSMUSG00000040016	19218	Ptger3	-2.117	0.000159839		ENSMUSG00000052271	17341	Bhlha15	-2.36542	1.02358e-25
ENSMUSG00000057098	13591	Ebf1	-2.11186	1.86032e-19		ENSMUSG00000029660	75860	Tex26	-2.36271	2.28375e-05
ENSMUSG00000024011	74116	Pi16	-2.10896	2.28657e-05		ENSMUSG00000024887	54447	Asah2	-2.36076	1.58035e-05
ENSMUSG00000086454	74959	Platr14	-2.10429	1.22248e-172		ENSMUSG00000031220	245532	Awat2	-2.35988	2.02632e-12
ENSMUSG00000050953	14609	Gja1	-2.10401	0		ENSMUSG00000099517	97908	Hist1h3g	-2.34879	5.84251e-08
ENSMUSG00000045312	218454	Lhfpl2	-2.10255	4.21083e-37		ENSMUSG00000070106	723852	Mir363	-2.34658	3.08366e-06
ENSMUSG00000037129	214531	Tmprss13	-2.102	3.60273e-17		ENSMUSG00000009108	14686	Gnat2	-2.34108	4.52754e-22
ENSMUSG00000034981	231440	Parm1	-2.10154	3.35953e-57		ENSMUSG00000048230	78803	Fbxo43	-2.33864	1.53084e-07
ENSMUSG00000036091	109685	Hyal3	-2.09955	9.18649e-05		ENSMUSG00000033446	67168	Lpar6	-2.33318	1.97682e-51
ENSMUSG00000045330	74437	4933402E13Rik	-2.09767	7.23779e-32		ENSMUSG00000007035	17687	Msh5	-2.33317	1.92309e-13
ENSMUSG00000030134	70727	Rasgef1a	-2.09383	1.02319e-08		ENSMUSG00000043088	57890	Il17re	-2.33052	3.44068e-08
ENSMUSG00000058152	78923	Chsy3	-2.09271	0.000545401		ENSMUSG00000058966	68952	Fam57b	-2.32888	3.4633e-55
ENSMUSG00000036019	278279	Tmtc2	-2.09133	2.16372e-18		ENSMUSG00000054272	245109	Zscan4c	-2.32727	2.61725e-43
ENSMUSG00000020044	21859	Timp3	-2.08894	9.19413e-53		ENSMUSG00000031375	12111	Bgn	-2.32282	1.28812e-08
ENSMUSG00000028545	67621	Bend5	-2.08736	6.27472e-24		ENSMUSG00000045733	212518	Sprn	-2.32263	0.000137647
ENSMUSG00000022892	11820	App	-2.08421	3.57718e-126		ENSMUSG00000030209	14812	Grin2b	-2.3211	3.90553e-05
ENSMUSG00000024727	225997	Trpm6	-2.08376	1.36516e-06		ENSMUSG00000015702	71790	Anxa9	-2.31681	2.5248e-07
ENSMUSG00000066720	56863	Cldn9	-2.08178	1.01415e-07		ENSMUSG00000108218	257871	Olfr1372-ps1	-2.31546	9.23814e-16
ENSMUSG00000021186	23876	Fbln5	-2.08086	4.79904e-06		ENSMUSG00000023903	240047	Mmp25	-2.31297	4.56694e-26
ENSMUSG00000064247	403178	Plcxd1	-2.07981	1.10848e-21		ENSMUSG00000037653	243043	Kctd8	-2.31223	4.8006e-05
ENSMUSG00000028780	20348	Sema3c	-2.07455	2.76196e-10		ENSMUSG00000045349	230863	Sh2d5	-2.3045	1.30749e-39
ENSMUSG00000038602	215085	Slc35f1	-2.07144	4.51812e-08		ENSMUSG00000058183	27390	Mmel1	-2.30287	2.34102e-28
ENSMUSG00000027380	74121	Acoxl	-2.06556	0.00110768		ENSMUSG00000087009	445267	Nphs1os	-2.30269	6.24966e-31
ENSMUSG00000027030	53416	Stk39	-2.05954	6.26313e-18		ENSMUSG00000019326	11754	Aoc3	-2.30166	1.94493e-05
ENSMUSG00000054728	218194	Phactr1	-2.0552	9.08415e-10		ENSMUSG00000002769	14711	Gnmt	-2.30153	1.93965e-27
ENSMUSG00000024503	20730	Spink1	-2.05338	1.24518e-25		ENSMUSG00000028573	75578	Fggy	-2.29999	9.82086e-47
ENSMUSG00000047501	12740	Cldn4	-2.053	0		ENSMUSG00000068876	70737	Cgn	-2.29622	3.74806e-242
ENSMUSG00000058773	56702	Hist1h1b	-2.05137	5.44226e-05		ENSMUSG00000020424	71962	Gatsl3	-2.2952	7.1024e-183
ENSMUSG00000000805	12351	Car4	-2.04978	2.71299e-51		ENSMUSG00000028883	20346	Sema3a	-2.29017	4.40827e-05
ENSMUSG00000108218	257871	Olfr1372-ps1	-2.04425	3.9689e-13		ENSMUSG00000003379	12518	Cd79a	-2.28979	5.81268e-11
ENSMUSG00000033278	19274	Ptprm	-2.03085	1.40394e-05		ENSMUSG00000024696	107321	Lpxn	-2.28815	9.49836e-05
ENSMUSG00000035694	353025	Caps2	-2.0293	1.7224e-29		ENSMUSG00000043843	330485	Tmem145	-2.28754	3.25805e-13
ENSMUSG00000022102	13449	Dok2	-2.02429	2.60808e-41		ENSMUSG00000055737	14600	Ghr	-2.28735	4.79024e-16
ENSMUSG00000097391	100040724	Mirg	-2.02314	1.25563e-91		ENSMUSG00000051335	328232	Gfod1	-2.28672	1.69993e-148
ENSMUSG00000021062	104886	Rab15	-2.02078	1.94309e-164		ENSMUSG00000049044	56508	Rapgef4	-2.28536	1.32558e-09
ENSMUSG00000025701	11689	Alox5	-2.02007	1.91749e-18		ENSMUSG00000012889	244550	Podnl1	-2.27882	4.91447e-07
ENSMUSG00000038765	16917	Lmx1b	-2.01589	1.76955e-07		ENSMUSG00000022208	319984	Jph4	-2.26667	4.49635e-53
ENSMUSG00000052353	80982	Cemip	-2.00663	8.02643e-29		ENSMUSG00000029861	76156	Fam131b	-2.25756	1.7603e-09
ENSMUSG00000097451	75745	Rian	-2.00408	0		ENSMUSG00000006574	20533	Slc4a1	-2.2571	8.20064e-05
ENSMUSG00000008193	272382	Spib	-2.00245	3.13734e-10		ENSMUSG00000006143	69665	Upk3bl	-2.25152	1.24261e-08
ENSMUSG00000034435	238257	Tmem30b	-1.99747	1.34316e-44		ENSMUSG00000042834	27528	Nrep	-2.25037	1.17545e-43
ENSMUSG00000033737	333564	Fndc3c1	-1.9961	2.51525e-22		ENSMUSG00000000861	14025	Bcl11a	-2.24383	2.41041e-11
ENSMUSG00000041134	224405	Cyyr1	-1.99527	2.30236e-45		ENSMUSG00000018569	53624	Cldn7	-2.24022	2.58742e-62
ENSMUSG00000042102	74129	Dmgdh	-1.98973	5.14256e-13		ENSMUSG00000040212	13732	Emp3	-2.23761	2.5362e-17
ENSMUSG00000042500	76850	Ago4	-1.98367	1.56045e-09		ENSMUSG00000026475	19734	Rgs16	-2.23345	5.02922e-20
ENSMUSG00000051000	229488	Fam160a1	-1.97937	2.38002e-12		ENSMUSG00000022215	68680	Fitm1	-2.22599	6.60919e-07
ENSMUSG00000045589	230235	Frrs1l	-1.97747	9.79739e-14		ENSMUSG00000033006	20665	Sox10	-2.22576	1.83499e-07
ENSMUSG00000022788	224014	Fgd4	-1.97658	1.93155e-58		ENSMUSG00000008461	14343	Fut1	-2.22457	1.03447e-08
ENSMUSG00000029650	71706	Slc46a3	-1.97605	1.63731e-14		ENSMUSG00000025389	17339	Mip	-2.22319	5.27913e-09
ENSMUSG00000051900	233810	Abca16	-1.97435	0.000217397		ENSMUSG00000061186	353282	Sfmbt2	-2.21922	4.64664e-270
ENSMUSG00000001300	13642	Efnb2	-1.97233	6.207e-70		ENSMUSG00000062480	224530	Acat3	-2.21647	1.13364e-05
ENSMUSG00000044681	269637	Cnpy1	-1.96824	3.446e-58		ENSMUSG00000086549	100415901	Gm13648	-2.21516	2.24228e-09
ENSMUSG00000039529	54670	Atp8b1	-1.96311	0.000304282		ENSMUSG00000003309	11768	Ap1m2	-2.21031	1.13254e-134
ENSMUSG00000034947	217203	Tmem106a	-1.96019	4.7486e-40		ENSMUSG00000067818	98932	Myl9	-2.21023	4.75855e-10
ENSMUSG00000035295	76646	Wdr38	-1.96004	9.15018e-11		ENSMUSG00000046971	271844	Pla2g4f	-2.20603	2.54572e-14
ENSMUSG00000041523	22269	Upk2	-1.95332	2.08355e-05		ENSMUSG00000097727	433111	F630040K05Rik	-2.20475	3.42964e-08
ENSMUSG00000040998	114249	Npnt	-1.95326	1.04838e-42		ENSMUSG00000031891	15484	Hsd11b2	-2.2046	5.8939e-05
ENSMUSG00000097885	100039684	5031434O11Rik	-1.95273	8.00669e-05		ENSMUSG00000029522	18778	Pla2g1b	-2.20236	1.37361e-189
ENSMUSG00000021703	218442	Serinc5	-1.95079	4.4687e-95		ENSMUSG00000072553	217071	Gm525	-2.20117	3.45696e-05
ENSMUSG00000094447	77358	9430069I07Rik	-1.94766	1.42362e-12		ENSMUSG00000042417	218630	Ccno	-2.1986	1.36021e-10
ENSMUSG00000034701	18012	Neurod1	-1.94713	1.65123e-113		ENSMUSG00000029838	19242	Ptn	-2.1981	0.000196986
ENSMUSG00000052914	13110	Cyp2j6	-1.94409	8.48655e-12		ENSMUSG00000027347	19419	Rasgrp1	-2.19574	7.74436e-12
ENSMUSG00000041741	54611	Pde3a	-1.94234	1.70098e-08		ENSMUSG00000007946	11859	Phox2a	-2.19447	6.72299e-23
ENSMUSG00000029660	75860	Tex26	-1.93995	0.000214256		ENSMUSG00000020698	12467	Cct6b	-2.19007	6.52196e-07
ENSMUSG00000031355	11856	Arhgap6	-1.93779	0.000914855		ENSMUSG00000099447	75584	2310030A07Rik	-2.18774	0.000233663
ENSMUSG00000078942	17952	Naip6	-1.93718	1.53224e-05		ENSMUSG00000023906	54419	Cldn6	-2.18222	1.63774e-177
ENSMUSG00000036766	227325	Dner	-1.9327	4.37763e-08		ENSMUSG00000038732	218121	Mboat1	-2.17657	1.80033e-22
ENSMUSG00000046186	235505	Cd109	-1.93109	1.31911e-25		ENSMUSG00000097666	105246501	A330094K24Rik	-2.17627	1.24573e-07
ENSMUSG00000032796	16772	Lama1	-1.93083	0		ENSMUSG00000053441	240322	Adamts19	-2.16694	9.35319e-15
ENSMUSG00000028373	56079	Astn2	-1.92919	0.00174553		ENSMUSG00000064307	69358	Lrrc51	-2.16651	7.94938e-12
ENSMUSG00000027249	14061	F2	-1.92871	2.52801e-12		ENSMUSG00000038298	59020	Pdzk1	-2.16629	0.000349037
ENSMUSG00000039208	210029	Metrnl	-1.92709	3.27336e-05		ENSMUSG00000025324	11982	Atp10a	-2.16432	4.06926e-52
ENSMUSG00000007035	17687	Msh5	-1.92686	2.12514e-10		ENSMUSG00000002006	245469	Pdzd4	-2.16426	0
ENSMUSG00000015882	209707	Lcorl	-1.92576	2.16121e-133		ENSMUSG00000036782	67455	Klhl13	-2.16211	0
ENSMUSG00000027215	12521	Cd82	-1.92382	8.69794e-05		ENSMUSG00000061482	319156	Hist1h4d	-2.16188	3.10515e-05
ENSMUSG00000071691	381196	Gm960	-1.92245	0.00276419		ENSMUSG00000024922	18426	Ovol1	-2.15986	4.69525e-09
ENSMUSG00000073399	195359	Trim40	-1.92205	3.39698e-08		ENSMUSG00000029716	50765	Tfr2	-2.1553	4.4366e-14
ENSMUSG00000048706	52829	Lurap1l	-1.92051	3.42764e-20		ENSMUSG00000024972	56072	Lgals12	-2.15439	1.86445e-07
ENSMUSG00000020122	13649	Egfr	-1.91385	1.02638e-48		ENSMUSG00000010751	79202	Tnfrsf22	-2.1519	4.05523e-124
ENSMUSG00000032419	76365	Tbx18	-1.91211	0.00356685		ENSMUSG00000070495	664799	Ctcfl	-2.14314	1.52186e-13
ENSMUSG00000031486	78560	Adgra2	-1.91173	7.85977e-44		ENSMUSG00000078816	18752	Prkcg	-2.14194	2.4246e-104
ENSMUSG00000038085	70873	Cnbd2	-1.90321	8.36647e-20		ENSMUSG00000025500	72000	Lmntd2	-2.14166	2.1956e-39
ENSMUSG00000021223	170721	Papln	-1.90226	2.23177e-06		ENSMUSG00000022176	140743	Rem2	-2.14113	2.87577e-11
ENSMUSG00000037321	21354	Tap1	-1.89855	5.68884e-52		ENSMUSG00000028047	21827	Thbs3	-2.13464	3.77035e-62
ENSMUSG00000042429	11539	Adora1	-1.89624	5.34834e-06		ENSMUSG00000026726	65969	Cubn	-2.13282	1.11933e-174
ENSMUSG00000056870	70676	Gulp1	-1.8956	6.86617e-24		ENSMUSG00000037731	230787	Themis2	-2.13215	1.66854e-14
ENSMUSG00000037411	18787	Serpine1	-1.89143	2.34496e-39		ENSMUSG00000110097	434555	Zscan4a	-2.12615	5.04116e-40
ENSMUSG00000000731	11634	Aire	-1.88911	1.63857e-41		ENSMUSG00000031952	56773	Chst5	-2.12601	3.15265e-13
ENSMUSG00000027171	228413	Prrg4	-1.8885	7.06442e-123		ENSMUSG00000034116	22324	Vav1	-2.1248	3.5065e-11
ENSMUSG00000013483	170720	Card14	-1.88603	0.00119379		ENSMUSG00000021728	13723	Emb	-2.12462	0
ENSMUSG00000070473	12739	Cldn3	-1.8852	1.49566e-25		ENSMUSG00000035875	98870	AI182371	-2.12237	2.36047e-07
ENSMUSG00000022574	223646	Naprt	-1.87996	2.49861e-129		ENSMUSG00000040016	19218	Ptger3	-2.12156	0.000132665
ENSMUSG00000095789	69034	Nupr1l	-1.87924	1.30949e-05		ENSMUSG00000059361	228777	Nrsn2	-2.12101	7.12832e-13
ENSMUSG00000020080	216019	Hkdc1	-1.87824	8.0615e-12		ENSMUSG00000010086	22671	Rnf112	-2.11183	0.00362362
ENSMUSG00000028600	242608	Podn	-1.87806	3.12102e-06		ENSMUSG00000029695	30956	Aass	-2.1052	2.93116e-103
ENSMUSG00000030022	101401	Adamts9	-1.87344	9.33279e-142		ENSMUSG00000024013	26382	Fgd2	-2.10398	0.000617813
ENSMUSG00000035314	233552	Gdpd5	-1.87062	3.03716e-29		ENSMUSG00000050050	320696	Ccdc158	-2.10174	6.62431e-23
ENSMUSG00000049866	320982	Arl4c	-1.86585	2.53749e-84		ENSMUSG00000052396	233549	Mogat2	-2.10143	7.71709e-05
ENSMUSG00000026879	227753	Gsn	-1.86538	2.23749e-43		ENSMUSG00000006586	12395	Runx1t1	-2.09845	2.1868e-37
ENSMUSG00000031298	237175	Adgrg2	-1.86382	0.000306043		ENSMUSG00000034037	232237	Fgd5	-2.0964	1.53193e-127
ENSMUSG00000039533	75104	Mmd2	-1.85877	1.07884e-08		ENSMUSG00000090714	545913	Zscan4d	-2.09481	2.66231e-36
ENSMUSG00000043782	212733	Bicdl2	-1.85665	7.42677e-14		ENSMUSG00000078817	378425	Nlrp12	-2.0942	4.47028e-05
ENSMUSG00000061740	56448	Cyp2d22	-1.85445	1.6734e-07		ENSMUSG00000001123	16859	Lgals9	-2.08272	8.69916e-39
ENSMUSG00000054196	68588	Cthrc1	-1.85119	8.6585e-09		ENSMUSG00000069835	69215	Sat2	-2.07932	1.27816e-12
ENSMUSG00000043843	330485	Tmem145	-1.84955	5.55511e-10		ENSMUSG00000022763	72168	Aifm3	-2.07887	3.08886e-22
ENSMUSG00000042312	20196	S100a13	-1.84819	3.41854e-11		ENSMUSG00000036095	217480	Dgkb	-2.07306	1.9877e-08
ENSMUSG00000032035	23871	Ets1	-1.84453	2.79315e-19		ENSMUSG00000091705	15013	H2-Q2	-2.07041	2.72178e-09
ENSMUSG00000032493	73336	Prss44	-1.84407	1.07837e-07		ENSMUSG00000078653	68107	Cntd1	-2.06825	2.61051e-33
ENSMUSG00000007888	12931	Crlf1	-1.84261	1.8541e-19		ENSMUSG00000003949	217082	Hlf	-2.06596	3.53585e-10
ENSMUSG00000028532	320508	Cachd1	-1.8425	3.03263e-57		ENSMUSG00000071658	14704	Gng3	-2.06522	6.16883e-201
ENSMUSG00000033361	208748	Prrg3	-1.8407	5.63558e-48		ENSMUSG00000022113	212085	Trim52	-2.06478	1.67628e-61
ENSMUSG00000047496	320311	Rnf152	-1.83783	4.29426e-12		ENSMUSG00000040714	232943	Klc3	-2.06281	2.23077e-72
ENSMUSG00000049420	77220	Tmem200a	-1.82874	0.00585072		ENSMUSG00000068457	22290	Uty	-2.06072	3.06024e-168
ENSMUSG00000024731	69826	Ms4a10	-1.82841	0.000390999		ENSMUSG00000025175	63828	Fn3k	-2.05939	0.000232066
ENSMUSG00000072553	217071	Gm525	-1.82733	0.000273524		ENSMUSG00000032267	235323	Usp28	-2.05561	0
ENSMUSG00000043342	15438	Hoxd9	-1.82679	0.000970235		ENSMUSG00000016262	214791	Sertad4	-2.05387	1.96577e-14
ENSMUSG00000003309	11768	Ap1m2	-1.82631	3.06801e-99		ENSMUSG00000037440	22361	Vnn1	-2.04708	2.27194e-08
ENSMUSG00000041923	319211	Nol4	-1.82441	0.00106139		ENSMUSG00000040649	108653	Rimklb	-2.04668	5.13718e-199
ENSMUSG00000022790	207683	Igsf11	-1.82353	1.17774e-05		ENSMUSG00000035694	353025	Caps2	-2.04601	1.89628e-30
ENSMUSG00000023039	110310	Krt7	-1.8194	4.99562e-09		ENSMUSG00000023911	76917	Flywch2	-2.04477	5.6614e-27
ENSMUSG00000027297	17005	Ltk	-1.81831	1.81522e-09		ENSMUSG00000028571	230459	Cyp2j13	-2.04375	4.18505e-06
ENSMUSG00000039865	213603	Slc44a3	-1.81778	1.52836e-14		ENSMUSG00000036091	109685	Hyal3	-2.04139	0.000104438
ENSMUSG00000028128	14066	F3	-1.81742	3.45019e-76		ENSMUSG00000040866	83434	Rsph6a	-2.04114	0.000116037
ENSMUSG00000006586	12395	Runx1t1	-1.81531	1.35391e-29		ENSMUSG00000028841	194231	Cnksr1	-2.03964	8.21819e-23
ENSMUSG00000041688	27494	Amot	-1.81062	1.27383e-77		ENSMUSG00000086993	102641859	Rsf1os2	-2.03371	0.00215034
ENSMUSG00000031997	22068	Trpc6	-1.80862	0.00818516		ENSMUSG00000030270	211232	Cpne9	-2.03146	7.33739e-24
ENSMUSG00000038393	56338	Txnip	-1.80791	0		ENSMUSG00000008601	53868	Rab25	-2.03084	3.68066e-16
ENSMUSG00000053141	19281	Ptprt	-1.80598	3.95011e-07		ENSMUSG00000046844	270097	Vat1l	-2.02699	9.80985e-18
ENSMUSG00000025993	53945	Slc40a1	-1.80539	9.23448e-25		ENSMUSG00000058297	94214	Spock2	-2.02615	1.87793e-131
ENSMUSG00000084915	100532730	C230037L18Rik	-1.7982	3.9207e-07		ENSMUSG00000030699	21389	Tbx6	-2.02524	4.76666e-09
ENSMUSG00000021278	93835	Amn	-1.79506	1.98385e-25		ENSMUSG00000057054	103844	Inca1	-2.02363	6.71313e-07
ENSMUSG00000041488	20908	Stx3	-1.79239	5.76061e-203		ENSMUSG00000006651	11803	Aplp1	-2.02275	0
ENSMUSG00000027560	76829	Dok5	-1.79186	0.0065956		ENSMUSG00000055692	224019	Tmem191c	-2.02015	5.75722e-68
ENSMUSG00000031870	18667	Pgr	-1.79043	3.28189e-05		ENSMUSG00000036492	386454	Rnf39	-2.01846	1.26078e-26
ENSMUSG00000028583	14726	Pdpn	-1.78772	4.03759e-62		ENSMUSG00000086638	74846	4930405A21Rik	-2.01752	0.000270179
ENSMUSG00000031111	209268	Igsf1	-1.78485	1.04494e-17		ENSMUSG00000027171	228413	Prrg4	-2.01581	5.72335e-139
ENSMUSG00000043664	434325	Tmem221	-1.78447	4.25469e-05		ENSMUSG00000032807	11686	Alox12b	-2.01481	0.000339883
ENSMUSG00000035852	78906	Misp	-1.78296	6.40818e-11		ENSMUSG00000020866	12291	Cacna1g	-2.01271	1.03924e-08
ENSMUSG00000052854	27206	Nrk	-1.7819	4.20409e-24		ENSMUSG00000045377	67020	Tmem88	-2.01053	5.90166e-45
ENSMUSG00000032584	19882	Mst1r	-1.78124	1.56638e-06		ENSMUSG00000035835	216152	Plppr3	-2.00298	2.32358e-14
ENSMUSG00000035615	666060	Frmpd1	-1.77907	3.98313e-13		ENSMUSG00000031963	73230	Bmper	-2.00145	1.5396e-12
ENSMUSG00000010796	74068	Asz1	-1.77858	0.00432132		ENSMUSG00000024910	13041	Ctsw	-1.99853	4.51999e-05
ENSMUSG00000024180	60455	Tmem8	-1.77709	7.29984e-123		ENSMUSG00000046402	19659	Rbp1	-1.99763	4.85186e-23
ENSMUSG00000021136	64075	Smoc1	-1.77443	4.01371e-136		ENSMUSG00000037390	666339	Muc3	-1.99434	0.000549748
ENSMUSG00000037860	383619	Aim2	-1.7702	3.48873e-108		ENSMUSG00000074457	67860	S100a16	-1.99368	9.06987e-12
ENSMUSG00000015501	15273	Hivep2	-1.76999	2.57128e-10		ENSMUSG00000027359	26458	Slc27a2	-1.98995	1.98963e-85
ENSMUSG00000022382	22422	Wnt7b	-1.75877	1.27397e-31		ENSMUSG00000027030	53416	Stk39	-1.98678	2.02116e-17
ENSMUSG00000026315	20725	Serpinb8	-1.75814	0.00829142		ENSMUSG00000015085	12496	Entpd2	-1.984	5.61321e-10
ENSMUSG00000042808	14776	Gpx2	-1.75734	5.27907e-26		ENSMUSG00000074871	64139	Ctsm	-1.97699	0.000149151
ENSMUSG00000034903	319876	Cobll1	-1.75675	9.61818e-23		ENSMUSG00000011256	11492	Adam19	-1.97574	0
ENSMUSG00000028184	99633	Adgrl2	-1.75335	1.38291e-193		ENSMUSG00000035547	12337	Capn5	-1.9717	5.28508e-176
ENSMUSG00000029121	12933	Crmp1	-1.75103	1.81857e-151		ENSMUSG00000043664	434325	Tmem221	-1.96829	9.96888e-06
ENSMUSG00000033577	17920	Myo6	-1.7507	3.63453e-139		ENSMUSG00000107622	75131	4930512J16Rik	-1.96776	1.77728e-05
ENSMUSG00000030020	243548	Prickle2	-1.74738	1.57638e-17		ENSMUSG00000028391	71354	Wdr31	-1.96263	1.34974e-117
ENSMUSG00000040322	229731	Slc25a24	-1.74415	4.74021e-19		ENSMUSG00000054667	16370	Irs4	-1.96231	6.25788e-19
ENSMUSG00000026748	67448	Plxdc2	-1.7415	7.18404e-54		ENSMUSG00000035498	109332	Cdcp1	-1.96102	5.25541e-26
ENSMUSG00000052889	18751	Prkcb	-1.74031	3.50688e-23		ENSMUSG00000000489	18591	Pdgfb	-1.95949	9.66431e-29
ENSMUSG00000056498	320782	Tmem154	-1.73804	4.71301e-07		ENSMUSG00000032332	12816	Col12a1	-1.95417	1.78931e-05
ENSMUSG00000078607	69066	1810010H24Rik	-1.73794	3.13864e-07		ENSMUSG00000041287	20670	Sox15	-1.94863	8.03394e-62
ENSMUSG00000037605	319387	Adgrl3	-1.73769	1.97262e-17		ENSMUSG00000053783	74230	1700016K19Rik	-1.94498	0.000381804
ENSMUSG00000059900	94346	Tmem40	-1.73683	1.51797e-12		ENSMUSG00000065952	546049	C330021F23Rik	-1.94415	3.95977e-24
ENSMUSG00000039004	12161	Bmp6	-1.73143	1.39222e-18		ENSMUSG00000030498	14453	Gas2	-1.94326	6.31647e-70
ENSMUSG00000081058	97114	Hist2h3c2	-1.72702	2.30855e-06		ENSMUSG00000038065	68235	Mturn	-1.93856	4.50499e-54
ENSMUSG00000088054	100316713	Mir1968	-1.72558	1.5091e-05		ENSMUSG00000044254	100102	Pcsk9	-1.9365	1.56604e-08
ENSMUSG00000028417	21350	Tal2	-1.72424	2.13025e-05		ENSMUSG00000027430	66044	Dtd1	-1.9361	1.423e-117
ENSMUSG00000020695	17534	Mrc2	-1.72419	3.07442e-26		ENSMUSG00000030382	26459	Slc27a5	-1.93278	0.000688674
ENSMUSG00000002688	18760	Prkd1	-1.71818	3.6337e-14		ENSMUSG00000010064	76257	Slc38a3	-1.93124	2.11139e-29
ENSMUSG00000033949	28105	Trim36	-1.71721	1.25378e-19		ENSMUSG00000036832	65086	Lpar3	-1.92859	0.000556271
ENSMUSG00000070803	56222	Cited4	-1.71502	2.85189e-09		ENSMUSG00000024827	104174	Gldc	-1.92709	0
ENSMUSG00000040118	12293	Cacna2d1	-1.71417	1.0591e-45		ENSMUSG00000064247	403178	Plcxd1	-1.92514	7.49709e-20
ENSMUSG00000097061	414085	9330151L19Rik	-1.71225	1.37401e-13		ENSMUSG00000092192	67685	Dyx1c1	-1.92473	1.11311e-10
ENSMUSG00000054659	242377	Pm20d2	-1.70803	1.27237e-10		ENSMUSG00000072945	622473	Ripply1	-1.92462	8.8295e-30
ENSMUSG00000053441	240322	Adamts19	-1.70717	1.1935e-10		ENSMUSG00000055341	431706	Zfp457	-1.92307	2.40906e-06
ENSMUSG00000029470	18438	P2rx4	-1.70588	4.33276e-30		ENSMUSG00000040613	11810	Apobec1	-1.92227	2.66339e-82
ENSMUSG00000002769	14711	Gnmt	-1.70548	6.37659e-18		ENSMUSG00000097842	320950	9330104G04Rik	-1.92148	4.64101e-07
ENSMUSG00000062991	211323	Nrg1	-1.70273	1.19499e-23		ENSMUSG00000028957	18628	Per3	-1.92071	1.35496e-43
ENSMUSG00000056300	100041433	Zfp981	-1.70193	2.14077e-148		ENSMUSG00000097574	320295	C920006O11Rik	-1.91998	5.22669e-25
ENSMUSG00000046056	282619	Sbsn	-1.69595	2.6376e-14		ENSMUSG00000069049	26908	Eif2s3y	-1.91838	7.13122e-272
ENSMUSG00000021217	243931	Tshz3	-1.68986	6.33726e-11		ENSMUSG00000020325	83554	Fstl3	-1.91633	1.27466e-11
ENSMUSG00000005124	22402	Wisp1	-1.68958	0.000172584		ENSMUSG00000051652	237387	Lrrc3	-1.91558	7.27952e-42
ENSMUSG00000029061	26561	Mmp23	-1.68957	5.19635e-12		ENSMUSG00000101355	319152	Hist1h3h	-1.91405	0.00106079
ENSMUSG00000058620	11552	Adra2b	-1.6887	4.15556e-07		ENSMUSG00000054951	71583	9130008F23Rik	-1.91328	0.000584958
ENSMUSG00000028758	16559	Kif17	-1.68655	4.92052e-09		ENSMUSG00000020101	74048	Vsir	-1.91323	2.48946e-07
ENSMUSG00000063531	20349	Sema3e	-1.68654	1.33447e-71		ENSMUSG00000060063	11690	Alox5ap	-1.91308	4.4531e-15
ENSMUSG00000040424	233020	Hipk4	-1.68566	2.1955e-11		ENSMUSG00000091383	667728	Hist1h2al	-1.91262	5.2039e-05
ENSMUSG00000020023	319880	Tmcc3	-1.68529	1.56285e-27		ENSMUSG00000020901	320207	Pik3r5	-1.90527	6.1092e-16
ENSMUSG00000037627	626596	Rgs22	-1.68418	6.09058e-30		ENSMUSG00000004698	79221	Hdac9	-1.90495	2.1197e-10
ENSMUSG00000024935	20510	Slc1a1	-1.6799	3.38379e-26		ENSMUSG00000035805	170790	Mlc1	-1.90494	0.00186653
ENSMUSG00000009376	17295	Met	-1.67728	4.37025e-30		ENSMUSG00000033788	26903	Dysf	-1.90159	5.86606e-85
ENSMUSG00000054951	71583	9130008F23Rik	-1.6759	0.00155619		ENSMUSG00000042286	192187	Stab1	-1.90138	0.000303158
ENSMUSG00000037335	15110	Hand1	-1.67155	1.71463e-08		ENSMUSG00000032492	19228	Pth1r	-1.89855	3.24828e-20
ENSMUSG00000030761	17921	Myo7a	-1.67138	1.5912e-36		ENSMUSG00000097662	328489	Gm2093	-1.89826	4.25961e-10
ENSMUSG00000011263	74463	Exoc3l2	-1.66894	2.31918e-06		ENSMUSG00000049848	319930	Ceacam19	-1.89801	1.26333e-05
ENSMUSG00000005968	22156	Tuft1	-1.66714	6.77861e-36		ENSMUSG00000037111	73251	Setd7	-1.89735	4.448e-146
ENSMUSG00000024186	50782	Rgs11	-1.66387	9.4539e-17		ENSMUSG00000060284	170574	Sp7	-1.89568	0.000668052
ENSMUSG00000025175	63828	Fn3k	-1.6632	0.00131507		ENSMUSG00000068601	621427	Gm10244	-1.89491	8.96073e-22
ENSMUSG00000042599	338523	Kdm7a	-1.6532	2.21e-145		ENSMUSG00000038267	73102	Slc22a23	-1.8931	6.02277e-35
ENSMUSG00000028173	68151	Wls	-1.65043	2.29823e-53		ENSMUSG00000093606	414095	B130034C11Rik	-1.88808	0.000304466
ENSMUSG00000091556	101055983	Gm14569	-1.64397	0.00101327		ENSMUSG00000074646	320095	6430550D23Rik	-1.88267	3.25781e-05
ENSMUSG00000034480	54004	Diaph2	-1.6433	2.56025e-122		ENSMUSG00000023456	21991	Tpi1	-1.88221	0
ENSMUSG00000042453	19699	Reln	-1.64092	3.95634e-11		ENSMUSG00000058773	56702	Hist1h1b	-1.88115	0.000120651
ENSMUSG00000048450	17701	Msx1	-1.63758	0.000835009		ENSMUSG00000025219	14179	Fgf8	-1.87993	0.00066311
ENSMUSG00000024827	104174	Gldc	-1.63146	0		ENSMUSG00000056492	224792	Adgrf5	-1.87843	9.37995e-11
ENSMUSG00000025855	19085	Prkar1b	-1.63075	6.44179e-07		ENSMUSG00000054150	212073	Syne3	-1.87506	1.09736e-12
ENSMUSG00000001249	15451	Hpn	-1.63003	1.15349e-36		ENSMUSG00000038094	224079	Atp13a4	-1.87373	4.65319e-06
ENSMUSG00000098557	239217	Kctd12	-1.6295	1.54152e-14		ENSMUSG00000022893	11504	Adamts1	-1.87373	8.91314e-16
ENSMUSG00000061353	20315	Cxcl12	-1.62946	0.000299938		ENSMUSG00000070828	665902	Zscan4f	-1.86967	2.34826e-14
ENSMUSG00000027347	19419	Rasgrp1	-1.62746	5.55254e-08		ENSMUSG00000037169	18109	Mycn	-1.8695	0
ENSMUSG00000024302	13527	Dtna	-1.62644	2.44019e-41		ENSMUSG00000096727	16912	Psmb9	-1.86294	2.65653e-15
ENSMUSG00000026958	83768	Dpp7	-1.62613	2.23393e-98		ENSMUSG00000048163	20345	Selplg	-1.86027	9.9176e-05
ENSMUSG00000097740	381223	E030044B06Rik	-1.62203	0.00112973		ENSMUSG00000040629	98558	Mael	-1.86019	1.19151e-89
ENSMUSG00000045087	94226	S1pr5	-1.62045	0.00128178		ENSMUSG00000035697	70719	Arhgap45	-1.86013	2.15486e-73
ENSMUSG00000029605	23961	Oas1b	-1.62008	0.00108831		ENSMUSG00000066952	231646	Myo1h	-1.85906	1.15626e-06
ENSMUSG00000046699	245446	Slitrk4	-1.61914	6.63599e-05		ENSMUSG00000027400	18610	Pdyn	-1.85706	8.99624e-15
ENSMUSG00000047507	545192	Baiap3	-1.619	5.47274e-05		ENSMUSG00000049539	80838	Hist1h1a	-1.85602	7.33105e-05
ENSMUSG00000047907	228911	Tshz2	-1.61718	0.00237702		ENSMUSG00000022780	30060	Meltf	-1.849	8.69965e-11
ENSMUSG00000030214	66857	Plbd1	-1.61717	4.59386e-10		ENSMUSG00000074093	75744	Svip	-1.84747	1.26334e-47
ENSMUSG00000030782	21804	Tgfb1i1	-1.6167	2.19269e-05		ENSMUSG00000031343	14396	Gabra3	-1.84744	0.000497972
ENSMUSG00000034616	245857	Ssh3	-1.61429	7.64674e-28		ENSMUSG00000011486	103775	Slc25a41	-1.84654	1.57538e-05
ENSMUSG00000000126	216795	Wnt9a	-1.61341	4.63015e-14		ENSMUSG00000039099	626359	Wdr93	-1.84492	1.52141e-11
ENSMUSG00000041132	100637	N4bp2l1	-1.61039	2.80071e-11		ENSMUSG00000056895	78303	Hist3h2ba	-1.84392	4.63492e-09
ENSMUSG00000087009	445267	Nphs1os	-1.60968	3.41496e-18		ENSMUSG00000024409	57390	Psors1c2	-1.84223	3.53719e-07
ENSMUSG00000046844	270097	Vat1l	-1.60761	1.32434e-12		ENSMUSG00000049555	20776	Tmie	-1.84158	1.80269e-11
ENSMUSG00000027765	18441	P2ry1	-1.60456	1.48536e-07		ENSMUSG00000020932	14580	Gfap	-1.83759	1.96017e-05
ENSMUSG00000043013	15379	Onecut1	-1.60367	0.000590139		ENSMUSG00000107879	330427	9330102E08Rik	-1.83708	1.12949e-16
ENSMUSG00000062480	224530	Acat3	-1.60171	0.000402725		ENSMUSG00000040280	407790	Ndufa4l2	-1.83512	3.23492e-06
ENSMUSG00000038598	100155	AI481877	-1.59434	1.35032e-15		ENSMUSG00000034780	26877	B3galt1	-1.8342	2.01823e-12
ENSMUSG00000066800	24014	Rnasel	-1.59398	0.00441293		ENSMUSG00000022657	84544	Cd96	-1.8311	0.002709
ENSMUSG00000053490	234329	Trim60	-1.5919	0.000334475		ENSMUSG00000054196	68588	Cthrc1	-1.83052	8.09048e-09
ENSMUSG00000015224	74519	Cyp2j9	-1.59145	2.86552e-05		ENSMUSG00000047446	11861	Arl4a	-1.82931	1.80043e-169
ENSMUSG00000000125	22415	Wnt3	-1.59114	0.000279592		ENSMUSG00000000094	21387	Tbx4	-1.8259	1.59499e-07
ENSMUSG00000031284	18481	Pak3	-1.58883	6.352e-14		ENSMUSG00000035615	666060	Frmpd1	-1.82095	8.45181e-14
ENSMUSG00000055692	224019	Tmem191c	-1.58865	1.01775e-45		ENSMUSG00000032401	235435	Lctl	-1.81961	1.21825e-08
ENSMUSG00000071604	381217	Fam189a2	-1.58712	7.15051e-13		ENSMUSG00000025491	68713	Ifitm1	-1.81864	7.37786e-282
ENSMUSG00000078485	231002	Plekhn1	-1.58611	1.67766e-13		ENSMUSG00000028758	16559	Kif17	-1.81707	4.14296e-10
ENSMUSG00000022054	18040	Nefm	-1.58511	1.34779e-14		ENSMUSG00000039059	99296	Hrh3	-1.80631	2.55723e-08
ENSMUSG00000000730	54427	Dnmt3l	-1.58102	0		ENSMUSG00000018845	217012	Unc45b	-1.80583	1.10522e-20
ENSMUSG00000005087	12505	Cd44	-1.58073	0.000708623		ENSMUSG00000031196	14069	F8	-1.80333	8.88537e-14
ENSMUSG00000084919	77645	Ptprtos	-1.5792	0.00358237		ENSMUSG00000034282	14027	Evpl	-1.80149	4.00087e-53
ENSMUSG00000049252	94217	Lrp1b	-1.578	2.40076e-05		ENSMUSG00000027478	13436	Dnmt3b	-1.79981	0
ENSMUSG00000049109	210757	Themis	-1.57662	0.000100462		ENSMUSG00000096035	381651	Gm1045	-1.79933	1.03088e-05
ENSMUSG00000027233	67578	Patl2	-1.57542	8.46901e-40		ENSMUSG00000028996	63954	Rbp7	-1.79644	5.89996e-08
ENSMUSG00000030110	19713	Ret	-1.57539	5.53578e-10		ENSMUSG00000040669	13619	Phc1	-1.7963	0
ENSMUSG00000032449	192287	Slc25a36	-1.57494	2.90498e-88		ENSMUSG00000052713	269023	Zfp608	-1.79387	8.44495e-08
ENSMUSG00000041548	80888	Hspb8	-1.57062	6.49226e-91		ENSMUSG00000060093	326619	Hist1h4a	-1.79279	0.00124413
ENSMUSG00000005803	59010	Sqor	-1.56936	0.000442017		ENSMUSG00000040231	58867	Syngr4	-1.79243	1.37371e-05
ENSMUSG00000018654	22778	Ikzf1	-1.56906	3.02709e-05		ENSMUSG00000022773	106369	Ypel1	-1.79189	1.43338e-34
ENSMUSG00000058498	433809	Rnf207	-1.56905	6.04277e-14		ENSMUSG00000097407	74454	4933408J17Rik	-1.78961	0.000729743
ENSMUSG00000056043	243923	Rgs9bp	-1.56694	2.84593e-40		ENSMUSG00000027246	269344	Ell3	-1.78933	6.932e-11
ENSMUSG00000027359	26458	Slc27a2	-1.5668	2.46872e-57		ENSMUSG00000040829	574428	Zmynd15	-1.7876	2.31499e-10
ENSMUSG00000034780	26877	B3galt1	-1.56263	7.72815e-10		ENSMUSG00000005124	22402	Wisp1	-1.78667	8.70113e-05
ENSMUSG00000046618	241327	Olfml2a	-1.56253	0.00126362		ENSMUSG00000035964	67937	Tmem59l	-1.78505	5.45433e-17
ENSMUSG00000063568	231986	Jazf1	-1.56153	0.00134207		ENSMUSG00000028583	14726	Pdpn	-1.7847	9.47531e-63
ENSMUSG00000024172	240119	St6gal2	-1.56089	5.84098e-05		ENSMUSG00000084950	434064	Gm5577	-1.78437	6.07719e-13
ENSMUSG00000022262	110082	Dnah5	-1.5605	0.000137932		ENSMUSG00000031767	67528	Nudt7	-1.78412	1.63161e-07
ENSMUSG00000025892	14802	Gria4	-1.56026	1.09604e-05		ENSMUSG00000096393	235634	Fam240a	-1.78369	0.00300681
ENSMUSG00000031841	12554	Cdh13	-1.56011	0.000371741		ENSMUSG00000077797	100217423	Snord19	-1.7798	8.57448e-09
ENSMUSG00000030930	77590	Chst15	-1.55873	2.33866e-07		ENSMUSG00000036856	22417	Wnt4	-1.7788	9.19542e-06
ENSMUSG00000022112	103978	Gpc5	-1.55852	0.0200702		ENSMUSG00000008496	18987	Pou2f2	-1.77476	3.7482e-35
ENSMUSG00000041378	12741	Cldn5	-1.55818	3.65736e-05		ENSMUSG00000037129	214531	Tmprss13	-1.7738	6.10971e-14
ENSMUSG00000022240	18163	Ctnnd2	-1.55772	1.85423e-10		ENSMUSG00000020642	108089	Rnf144a	-1.77228	4.18991e-48
ENSMUSG00000061859	12695	Patj	-1.55769	1.86539e-45		ENSMUSG00000042797	66333	Aqp11	-1.76991	5.11688e-19
ENSMUSG00000044279	224912	Crb3	-1.55423	4.61055e-27		ENSMUSG00000051455	268491	Meioc	-1.76856	7.16467e-111
ENSMUSG00000020674	69675	Pxdn	-1.5529	5.56723e-71		ENSMUSG00000069045	26900	Ddx3y	-1.76839	1.14496e-284
ENSMUSG00000026018	70375	Ica1l	-1.55282	0.000185164		ENSMUSG00000001901	192775	Kcnh6	-1.76567	1.87705e-16
ENSMUSG00000021098	75801	4930447C04Rik	-1.5517	7.26497e-110		ENSMUSG00000046854	227733	Pip5kl1	-1.76543	6.41436e-13
ENSMUSG00000064294	71724	Aox3	-1.55076	2.21882e-05		ENSMUSG00000035126	242584	Wdr78	-1.76347	1.97578e-12
ENSMUSG00000043969	13797	Emx2	-1.54984	0.00294233		ENSMUSG00000024261	20983	Syt4	-1.75983	1.12075e-18
ENSMUSG00000035258	320712	Abi3bp	-1.5439	0.00019152		ENSMUSG00000011263	74463	Exoc3l2	-1.75975	7.32371e-07
ENSMUSG00000039452	382083	Snx22	-1.53503	1.74743e-06		ENSMUSG00000035773	114229	Kiss1r	-1.75793	2.51731e-05
ENSMUSG00000057706	108797	Mex3b	-1.53156	7.47719e-23		ENSMUSG00000022101	14171	Fgf17	-1.75494	8.26321e-115
ENSMUSG00000022747	54613	St3gal6	-1.53109	0.000251445		ENSMUSG00000021874	71106	4933413J09Rik	-1.75459	0.00321467
ENSMUSG00000002900	16777	Lamb1	-1.53028	0		ENSMUSG00000085042	69812	Abhd11os	-1.7544	3.01512e-17
ENSMUSG00000020102	20503	Slc16a7	-1.52925	0.00202396		ENSMUSG00000032327	20897	Stra6	-1.75403	3.77e-07
ENSMUSG00000032420	23959	Nt5e	-1.52639	1.48917e-16		ENSMUSG00000030630	14085	Fah	-1.75387	1.16445e-61
ENSMUSG00000048249	77128	Crebrf	-1.52627	1.38195e-110		ENSMUSG00000005803	59010	Sqor	-1.75236	0.00014439
ENSMUSG00000078954	73167	Arhgap8	-1.5262	4.21778e-103		ENSMUSG00000032358	208994	Fam83b	-1.75233	7.42613e-17
ENSMUSG00000023092	14199	Fhl1	-1.52488	5.00978e-141		ENSMUSG00000097740	381223	E030044B06Rik	-1.7518	0.000609695
ENSMUSG00000054342	16534	Kcnn4	-1.52347	3.27246e-07		ENSMUSG00000000794	140493	Kcnn3	-1.75098	6.1754e-05
ENSMUSG00000017943	228858	Gdap1l1	-1.52338	8.46827e-14		ENSMUSG00000047261	14432	Gap43	-1.74874	4.64323e-36
ENSMUSG00000039450	67880	Dcxr	-1.52156	1.72356e-63		ENSMUSG00000078182	619355	Gm6083	-1.74413	0.00129823
ENSMUSG00000042284	109700	Itga1	-1.52002	4.30394e-09		ENSMUSG00000097321	625175	1700028E10Rik	-1.74108	6.83772e-06
ENSMUSG00000015222	17756	Map2	-1.51848	3.42233e-38		ENSMUSG00000019647	20358	Sema6a	-1.73929	1.05913e-15
ENSMUSG00000075256	228094	Cerkl	-1.51698	1.48096e-06		ENSMUSG00000025892	14802	Gria4	-1.73598	1.65108e-06
ENSMUSG00000020297	18197	Nsg2	-1.51664	2.15886e-11		ENSMUSG00000053030	69982	Spink2	-1.73175	0.0133165
ENSMUSG00000079741	235779	Nlrp4g	-1.51582	0.0215634		ENSMUSG00000048583	16002	Igf2	-1.7288	1.42275e-61
ENSMUSG00000022324	17181	Matn2	-1.51379	2.91145e-11		ENSMUSG00000036181	50708	Hist1h1c	-1.72871	5.93665e-25
ENSMUSG00000032105	170761	Pdzd3	-1.51361	1.96318e-10		ENSMUSG00000050270	338369	Tmem220	-1.72548	1.23953e-10
ENSMUSG00000018920	66102	Cxcl16	-1.50915	3.26862e-24		ENSMUSG00000097536	70040	2610037D02Rik	-1.72302	7.39468e-23
ENSMUSG00000087026	320466	A230103J11Rik	-1.50791	0.00342073		ENSMUSG00000024030	11307	Abcg1	-1.72203	5.99099e-51
ENSMUSG00000037016	242022	Frem2	-1.5074	1.34238e-59		ENSMUSG00000037735	72669	2810032G03Rik	-1.72199	0.00449414
ENSMUSG00000031026	330627	Trim66	-1.50736	1.46105e-13		ENSMUSG00000073599	68545	Ecscr	-1.72027	8.96959e-07
ENSMUSG00000020734	14813	Grin2c	-1.50666	1.79855e-08		ENSMUSG00000095276	100039953	Gfy	-1.7202	6.57377e-05
ENSMUSG00000067818	98932	Myl9	-1.50537	3.22888e-06		ENSMUSG00000035295	76646	Wdr38	-1.72013	2.90476e-09
ENSMUSG00000033039	27008	Micall1	-1.50492	8.82093e-80		ENSMUSG00000036390	13197	Gadd45a	-1.71883	0
ENSMUSG00000029298	236573	Gbp9	-1.50373	4.9425e-09		ENSMUSG00000036136	104943	Fam110c	-1.71822	0.00103973
ENSMUSG00000020376	59044	Rnf130	-1.50038	4.20749e-48		ENSMUSG00000029086	19126	Prom1	-1.71472	6.16682e-19
ENSMUSG00000055780	83563	Usp26	-1.49945	4.59519e-14		ENSMUSG00000022015	21943	Tnfsf11	-1.71455	3.46616e-12
ENSMUSG00000029838	19242	Ptn	-1.49913	0.0029964		ENSMUSG00000019027	110084	Dnah1	-1.71362	6.01048e-19
ENSMUSG00000045092	13609	S1pr1	-1.49901	0.000331366		ENSMUSG00000059277	97423	R74862	-1.71274	1.20031e-19
ENSMUSG00000028860	269589	Sytl1	-1.49787	1.39919e-13		ENSMUSG00000002384	12164	Bmp8b	-1.71265	2.12936e-15
ENSMUSG00000055862	71564	Izumo4	-1.49761	4.37151e-10		ENSMUSG00000049097	545554	Ankrd34a	-1.71112	1.9639e-20
ENSMUSG00000037949	102566	Ano10	-1.49613	2.96015e-19		ENSMUSG00000095339	665780	Zscan4b	-1.70949	7.70391e-11
ENSMUSG00000031434	75746	Morc4	-1.49215	8.47321e-46		ENSMUSG00000056413	231821	Adap1	-1.70693	1.85971e-224
ENSMUSG00000056492	224792	Adgrf5	-1.49074	7.81471e-08		ENSMUSG00000027834	20713	Serpini1	-1.7063	5.11752e-30
ENSMUSG00000057454	72434	Lypd3	-1.49038	0.00554367		ENSMUSG00000075314	383709	Gm1322	-1.70626	0.000638942
ENSMUSG00000030560	13032	Ctsc	-1.49031	6.81443e-22		ENSMUSG00000043913	269693	Ccdc60	-1.70525	2.05692e-12
ENSMUSG00000031925	270118	Maml2	-1.49027	5.75756e-06		ENSMUSG00000028927	18600	Padi2	-1.69796	3.19933e-41
ENSMUSG00000057054	103844	Inca1	-1.48923	7.71672e-05		ENSMUSG00000056174	329941	Col8a2	-1.69551	2.53287e-07
ENSMUSG00000031530	319520	Dusp4	-1.48819	1.15567e-110		ENSMUSG00000025082	240675	Vwa2	-1.69539	2.81876e-11
ENSMUSG00000051177	18795	Plcb1	-1.48803	4.2836e-10		ENSMUSG00000027297	17005	Ltk	-1.69355	8.82379e-09
ENSMUSG00000024778	14102	Fas	-1.48518	0.00149451		ENSMUSG00000024177	56520	Nme4	-1.69302	4.20467e-124
ENSMUSG00000073294	102991	AU022751	-1.48198	7.90562e-16		ENSMUSG00000043969	13797	Emx2	-1.69157	0.00173686
ENSMUSG00000034487	68304	Kdelc2	-1.48166	1.14342e-46		ENSMUSG00000042599	338523	Kdm7a	-1.69074	1.87199e-153
ENSMUSG00000004933	17179	Matk	-1.48048	6.9161e-11		ENSMUSG00000031432	19139	Prps1	-1.68882	0
ENSMUSG00000052565	14957	Hist1h1d	-1.47943	0.000108108		ENSMUSG00000034614	216505	Pik3ip1	-1.68848	9.68745e-19
ENSMUSG00000028571	230459	Cyp2j13	-1.47835	0.000258152		ENSMUSG00000085628	654810	Appbp2os	-1.68826	2.99545e-07
ENSMUSG00000052713	269023	Zfp608	-1.47831	4.59319e-06		ENSMUSG00000025963	76668	Mdh1b	-1.68807	0.00141003
ENSMUSG00000032245	76524	Cln6	-1.47604	9.31685e-82		ENSMUSG00000020268	75530	Lyrm7	-1.68358	1.4586e-14
ENSMUSG00000055447	16423	Cd47	-1.47603	6.28998e-18		ENSMUSG00000073399	195359	Trim40	-1.68078	4.68502e-07
ENSMUSG00000036402	14701	Gng12	-1.47449	2.29304e-46		ENSMUSG00000040420	320865	Cdh18	-1.67973	0.000388348
ENSMUSG00000041552	211612	Ptchd1	-1.47325	0.000186615		ENSMUSG00000063594	14709	Gng8	-1.6797	3.19976e-05
ENSMUSG00000031709	71310	Tbc1d9	-1.47194	1.14616e-53		ENSMUSG00000024501	22240	Dpysl3	-1.67916	1.31284e-147
ENSMUSG00000060445	320558	Sycp2	-1.465	1.63469e-16		ENSMUSG00000041696	70784	Rasl12	-1.67865	0.00056559
ENSMUSG00000049848	319930	Ceacam19	-1.46419	0.000280114		ENSMUSG00000060550	15018	H2-Q7	-1.67853	1.38806e-10
ENSMUSG00000042444	235461	Mindy2	-1.462	9.46802e-18		ENSMUSG00000026872	24136	Zeb2	-1.67621	4.24855e-10
ENSMUSG00000032246	75600	Calml4	-1.45857	2.28367e-13		ENSMUSG00000029832	18025	Nfe2l3	-1.676	3.0166e-09
ENSMUSG00000018893	17189	Mb	-1.45671	0.000743874		ENSMUSG00000034452	214111	Slc24a1	-1.67493	3.40223e-22
ENSMUSG00000069044	107868	Usp9y	-1.45469	0.0124131		ENSMUSG00000098789	433466	Jmjd7	-1.67452	1.04148e-09
ENSMUSG00000024027	14652	Glp1r	-1.45445	3.61927e-09		ENSMUSG00000028860	269589	Sytl1	-1.67253	3.16201e-16
ENSMUSG00000045053	225030	Kcng3	-1.45398	1.40083e-05		ENSMUSG00000048603	105246056	Gm9828	-1.66925	7.74821e-15
ENSMUSG00000037999	212285	Arap2	-1.45315	2.23002e-47		ENSMUSG00000072905	100039042	Gm2016	-1.66874	3.25234e-10
ENSMUSG00000092981	100628593	Mir5125	-1.4502	4.50955e-17		ENSMUSG00000004371	16156	Il11	-1.66742	0.000109755
ENSMUSG00000023043	16668	Krt18	-1.4499	6.74433e-50		ENSMUSG00000004864	26415	Mapk13	-1.66604	3.59969e-62
ENSMUSG00000012017	224024	Scarf2	-1.44779	9.29738e-12		ENSMUSG00000051747	22138	Ttn	-1.66127	3.2239e-41
ENSMUSG00000036687	231832	Tmem184a	-1.44438	1.1998e-08		ENSMUSG00000004328	53417	Hif3a	-1.66015	7.29761e-67
ENSMUSG00000038578	634731	Susd1	-1.44363	2.27299e-29		ENSMUSG00000023959	224796	Clic5	-1.65717	1.79138e-07
ENSMUSG00000022780	30060	Meltf	-1.44314	1.20454e-07		ENSMUSG00000006457	11474	Actn3	-1.65418	9.85456e-86
ENSMUSG00000029086	19126	Prom1	-1.442	2.24184e-14		ENSMUSG00000052373	13384	Mpp3	-1.65399	1.07263e-13
ENSMUSG00000046323	73708	Dppa3	-1.44158	2.40335e-16		ENSMUSG00000038403	69585	Hfe2	-1.65386	5.92012e-11
ENSMUSG00000034258	217721	Mfsd7c	-1.4409	3.31992e-20		ENSMUSG00000059406	432478	Tmprss9	-1.65361	0.0092239
ENSMUSG00000075595	268469	Zfp652	-1.44035	7.86579e-223		ENSMUSG00000024670	12511	Cd6	-1.65334	3.12368e-06
ENSMUSG00000087149	634882	Itih5l-ps	-1.43796	0.000284158		ENSMUSG00000005465	50931	Il27ra	-1.6527	8.17107e-16
ENSMUSG00000004798	29869	Ulk2	-1.43763	9.62419e-21		ENSMUSG00000021187	74413	Tc2n	-1.65173	1.92182e-10
ENSMUSG00000024190	19252	Dusp1	-1.43452	3.63372e-114		ENSMUSG00000056258	110862	Kcnq3	-1.64949	0.000231631
ENSMUSG00000028883	20346	Sema3a	-1.4325	0.0022823		ENSMUSG00000032380	13143	Dapk2	-1.64453	1.24208e-05
ENSMUSG00000026227	72792	2810459M11Rik	-1.4324	0.000913362		ENSMUSG00000030606	67666	Hapln3	-1.64444	2.59186e-07
ENSMUSG00000097574	320295	C920006O11Rik	-1.43138	9.69067e-16		ENSMUSG00000017969	19223	Ptgis	-1.64292	6.9645e-65
ENSMUSG00000039116	215798	Adgrg6	-1.42995	1.0164e-13		ENSMUSG00000031380	14205	Vegfd	-1.64016	5.27936e-09
ENSMUSG00000040372	81006	Gpr63	-1.4281	1.27756e-05		ENSMUSG00000028876	230735	Epha10	-1.63459	3.43782e-08
ENSMUSG00000050345	214639	4930486L24Rik	-1.42568	1.02768e-07		ENSMUSG00000038665	320127	Dgki	-1.63391	3.59145e-09
ENSMUSG00000053111	66930	Fank1	-1.42561	2.23607e-06		ENSMUSG00000042360	114673	4930433N12Rik	-1.63153	4.36041e-07
ENSMUSG00000029576	231858	Radil	-1.41939	2.2942e-39		ENSMUSG00000021848	18424	Otx2	-1.6312	2.64017e-61
ENSMUSG00000018672	56358	Copz2	-1.41873	1.12435e-05		ENSMUSG00000064373	20363	Selenop	-1.63105	2.09645e-26
ENSMUSG00000029861	76156	Fam131b	-1.41864	2.30135e-05		ENSMUSG00000024837	50796	Dmrt1	-1.63056	1.21989e-154
ENSMUSG00000024074	50766	Crim1	-1.417	4.2727e-45		ENSMUSG00000002900	16777	Lamb1	-1.6282	0
ENSMUSG00000091712	665119	Sec14l5	-1.41481	5.92793e-07		ENSMUSG00000016758	12124	Bik	-1.62768	1.63065e-09
ENSMUSG00000010825	170935	Grid2ip	-1.413	1.68916e-05		ENSMUSG00000055923	231326	Aasdh	-1.6274	1.11396e-85
ENSMUSG00000044786	22695	Zfp36	-1.41248	1.30113e-56		ENSMUSG00000067889	20743	Sptbn2	-1.62707	9.1521e-92
ENSMUSG00000049800	58172	Sertad2	-1.41216	1.16302e-116		ENSMUSG00000027603	207182	Ggt7	-1.62687	3.94331e-10
ENSMUSG00000046442	320472	Ppm1e	-1.41006	1.63534e-18		ENSMUSG00000011382	71755	Dhdh	-1.62525	1.93978e-84
ENSMUSG00000045349	230863	Sh2d5	-1.40944	5.19019e-19		ENSMUSG00000013367	210094	Iglon5	-1.62359	4.04616e-13
ENSMUSG00000035305	26563	Ror1	-1.4088	5.69658e-05		ENSMUSG00000058498	433809	Rnf207	-1.62011	7.95077e-15
ENSMUSG00000032087	114873	Dscaml1	-1.40767	6.63632e-15		ENSMUSG00000037108	381678	Zcwpw1	-1.61951	7.46257e-132
ENSMUSG00000004371	16156	Il11	-1.40725	0.000615026		ENSMUSG00000039021	338348	Ttc16	-1.61911	1.96117e-06
ENSMUSG00000053338	245126	Tarm1	-1.40288	8.05468e-09		ENSMUSG00000041809	71877	Efhc1	-1.61827	1.09319e-13
ENSMUSG00000022304	64705	Dpys	-1.40049	4.93518e-47		ENSMUSG00000089889	67672	0610040B10Rik	-1.618	0.000245668
ENSMUSG00000025408	13198	Ddit3	-1.39998	6.63344e-85		ENSMUSG00000059901	237360	Adamts14	-1.61744	2.47385e-80
ENSMUSG00000015134	56847	Aldh1a3	-1.39819	0.000481597		ENSMUSG00000031825	78892	Crispld2	-1.61665	1.37229e-07
ENSMUSG00000054150	212073	Syne3	-1.39489	2.37908e-08		ENSMUSG00000085957	214292	Syna	-1.61479	0.00056631
ENSMUSG00000027075	72401	Slc43a1	-1.39351	6.29472e-28		ENSMUSG00000091898	21924	Tnnc1	-1.61401	0.000123803
ENSMUSG00000004633	69993	Chn2	-1.39299	1.72796e-16		ENSMUSG00000020044	21859	Timp3	-1.61399	4.45114e-36
ENSMUSG00000031853	234878	Map3k21	-1.39256	0.00157844		ENSMUSG00000030653	207728	Gm45837	-1.6131	1.7395e-26
ENSMUSG00000097032	319587	4930539J05Rik	-1.39247	7.69916e-05		ENSMUSG00000010044	114602	Zmynd10	-1.61174	7.21214e-08
ENSMUSG00000027868	21384	Tbx15	-1.3915	4.7848e-05		ENSMUSG00000038859	66898	Baiap2l1	-1.61083	7.95307e-24
ENSMUSG00000020486	18952	2025-09-04	-1.39093	3.77687e-05		ENSMUSG00000036466	214058	Megf11	-1.61083	1.67776e-21
ENSMUSG00000020709	216991	Adap2	-1.38885	1.52964e-13		ENSMUSG00000052605	67441	Isoc2b	-1.61056	7.41033e-05
ENSMUSG00000024261	20983	Syt4	-1.38846	6.3679e-13		ENSMUSG00000021994	22418	Wnt5a	-1.61002	0.000361425
ENSMUSG00000059013	27387	Sh2d3c	-1.38712	1.00673e-27		ENSMUSG00000032245	76524	Cln6	-1.60981	6.175e-96
ENSMUSG00000020282	13650	Rhbdf1	-1.38693	1.34393e-72		ENSMUSG00000071665	436240	Foxr2	-1.60904	9.46937e-10
ENSMUSG00000022408	213956	Fam83f	-1.382	2.59449e-06		ENSMUSG00000025915	170755	Sgk3	-1.60665	3.81219e-66
ENSMUSG00000028033	226922	Kcnq5	-1.38045	0.000237342		ENSMUSG00000040489	214105	Sox30	-1.60277	0.00260445
ENSMUSG00000046750	280621	Selenov	-1.37974	0.00534063		ENSMUSG00000020020	327799	Usp44	-1.60037	2.21805e-65
ENSMUSG00000038594	100038725	Cep85l	-1.37884	2.21699e-11		ENSMUSG00000025383	83430	Il23a	-1.60011	1.82267e-11
ENSMUSG00000052684	16476	Jun	-1.37866	1.30326e-41		ENSMUSG00000031786	330830	Drc7	-1.59957	7.0778e-09
ENSMUSG00000034151	213234	Zbbx	-1.37801	2.34861e-13		ENSMUSG00000040938	216867	Slc16a11	-1.59707	2.93648e-05
ENSMUSG00000039934	212167	Gsap	-1.37578	4.28666e-05		ENSMUSG00000027238	228564	Frmd5	-1.59702	5.53069e-49
ENSMUSG00000050989	74777	Selenon	-1.37376	4.88407e-32		ENSMUSG00000029189	231238	Sel1l3	-1.59632	1.79042e-06
ENSMUSG00000031376	320707	Atp2b3	-1.37365	0.00327131		ENSMUSG00000051817	20667	Sox12	-1.59613	2.76222e-289
ENSMUSG00000078952	100039691	Lncenc1	-1.37168	0		ENSMUSG00000097162	78329	2310010J17Rik	-1.59587	2.36175e-06
ENSMUSG00000030340	20276	Scnn1a	-1.37064	1.14846e-05		ENSMUSG00000069266	326620	Hist1h4b	-1.5958	0.00295148
ENSMUSG00000045034	218440	Ankrd34b	-1.36973	7.80953e-05		ENSMUSG00000001948	20686	Spa17	-1.59545	1.33168e-05
ENSMUSG00000002997	19088	Prkar2b	-1.36942	2.29825e-19		ENSMUSG00000038781	106766	Stap2	-1.59436	2.47899e-22
ENSMUSG00000018427	77864	Ypel2	-1.36929	3.4088e-52		ENSMUSG00000047656	107328	Trpt1	-1.59394	7.65772e-16
ENSMUSG00000027570	12841	Col9a3	-1.36919	2.80686e-16		ENSMUSG00000092167	100042149	Gm3696	-1.59389	8.21581e-05
ENSMUSG00000000489	18591	Pdgfb	-1.36702	2.5198e-16		ENSMUSG00000061718	19049	Ppp1r1b	-1.59291	3.8181e-09
ENSMUSG00000033540	15932	Idua	-1.36656	1.37301e-29		ENSMUSG00000028104	69870	Polr3gl	-1.59049	1.6141e-40
ENSMUSG00000021061	20741	Sptb	-1.36625	2.10151e-69		ENSMUSG00000035929	15015	H2-Q4	-1.59039	3.14278e-24
ENSMUSG00000086171	378776	Pcsk2os1	-1.36598	0.00142898		ENSMUSG00000073016	331487	Uprt	-1.58991	6.98606e-17
ENSMUSG00000100572	69750	2410021H03Rik	-1.36463	1.59048e-09		ENSMUSG00000024154	71828	Gtf2a1l	-1.58846	0.000160276
ENSMUSG00000073406	14963	H2-Bl	-1.36446	2.26086e-09		ENSMUSG00000002107	14007	Celf2	-1.58719	7.63482e-31
ENSMUSG00000095276	100039953	Gfy	-1.36431	0.000719582		ENSMUSG00000052221	210762	Ppp1r36	-1.58716	9.22125e-05
ENSMUSG00000027227	20322	Sord	-1.36303	2.92447e-123		ENSMUSG00000023277	23999	Twf2	-1.58615	9.85848e-251
ENSMUSG00000028109	67981	Hormad1	-1.36301	2.15459e-46		ENSMUSG00000003271	54200	Sult2b1	-1.58547	7.9264e-07
ENSMUSG00000068270	208431	Shroom4	-1.36111	5.37139e-48		ENSMUSG00000086322	77490	E130218I03Rik	-1.58508	0.00486512
ENSMUSG00000005320	14186	Fgfr4	-1.36013	3.47231e-19		ENSMUSG00000009092	70377	Derl3	-1.58395	6.21886e-16
ENSMUSG00000070072	723937	Mir433	-1.36009	0.0131293		ENSMUSG00000035305	26563	Ror1	-1.58092	1.028e-05
ENSMUSG00000038580	20287	Sct	-1.3591	6.58337e-05		ENSMUSG00000026994	14425	Galnt3	-1.57622	5.22034e-16
ENSMUSG00000059456	19229	Ptk2b	-1.3587	8.21864e-65		ENSMUSG00000030350	381813	Prmt8	-1.57569	3.70476e-29
ENSMUSG00000039391	70884	Ccdc81	-1.35346	0.0130995		ENSMUSG00000074398	100038464	Gm15441	-1.57261	6.61292e-05
ENSMUSG00000074340	12659	Ovgp1	-1.35316	1.41436e-11		ENSMUSG00000028750	18781	Pla2g2c	-1.57211	0.000322171
ENSMUSG00000054404	327978	Slfn5	-1.35144	0.00156072		ENSMUSG00000070803	56222	Cited4	-1.5718	2.32005e-08
ENSMUSG00000029074	330010	Ttll10	-1.35057	0.00280659		ENSMUSG00000020583	17182	Matn3	-1.57073	4.81532e-18
ENSMUSG00000032278	74090	Paqr5	-1.35017	0.00082713		ENSMUSG00000032359	13036	Ctsh	-1.56964	1.23238e-06
ENSMUSG00000033306	210126	Lpp	-1.34802	4.61588e-62		ENSMUSG00000074415	73144	2610203C20Rik	-1.56635	0.00467247
ENSMUSG00000025608	27205	Podxl	-1.34431	8.00931e-114		ENSMUSG00000033752	76915	Mnd1	-1.56466	7.84373e-105
ENSMUSG00000018581	13411	Dnah11	-1.34392	8.54441e-09		ENSMUSG00000070331	217341	Qrich2	-1.56393	0.000238791
ENSMUSG00000067916	666532	Zfp991	-1.34147	2.79354e-28		ENSMUSG00000086596	382111	Susd5	-1.56345	5.18318e-13
ENSMUSG00000014361	17289	Mertk	-1.34137	2.82958e-20		ENSMUSG00000002565	20259	Scin	-1.56332	0.00075125
ENSMUSG00000057716	434008	Tmem178b	-1.34021	0.00278874		ENSMUSG00000021604	50916	Irx4	-1.56216	0.000951764
ENSMUSG00000023905	27279	Tnfrsf12a	-1.34014	5.11322e-39		ENSMUSG00000017390	11676	Aldoc	-1.56195	3.33652e-33
ENSMUSG00000041607	17196	Mbp	-1.33784	3.86055e-11		ENSMUSG00000029195	83379	Klb	-1.56068	8.72064e-15
ENSMUSG00000050270	338369	Tmem220	-1.33645	1.92012e-07		ENSMUSG00000027719	21744	Adad1	-1.55879	4.58707e-05
ENSMUSG00000048583	16002	Igf2	-1.33609	1.61993e-39		ENSMUSG00000032572	68553	Col6a4	-1.55832	4.91842e-24
ENSMUSG00000022421	73340	Nptxr	-1.33419	8.04311e-52		ENSMUSG00000059013	27387	Sh2d3c	-1.55703	7.08234e-34
ENSMUSG00000052861	330355	Dnah6	-1.33403	2.79908e-19		ENSMUSG00000007888	12931	Crlf1	-1.55501	1.9335e-15
ENSMUSG00000075590	223649	Nrbp2	-1.33379	2.11184e-26		ENSMUSG00000064493	100316932	Snora28	-1.55453	1.26106e-17
ENSMUSG00000019899	16773	Lama2	-1.33291	0.000524169		ENSMUSG00000033318	14872	Gstt2	-1.55396	7.29718e-57
ENSMUSG00000032878	216613	Ccdc85a	-1.33196	3.56339e-15		ENSMUSG00000034285	18082	Nipsnap1	-1.55377	4.5156e-282
ENSMUSG00000067878	320923	Map7d3	-1.33039	2.62662e-36		ENSMUSG00000020661	13435	Dnmt3a	-1.55277	0
ENSMUSG00000040705	100503495	A930016O22Rik	-1.32779	0.00211966		ENSMUSG00000005373	58805	Mlxipl	-1.55005	3.33237e-37
ENSMUSG00000029860	22793	Zyx	-1.32585	3.43794e-57		ENSMUSG00000023044	246277	Csad	-1.54755	2.67959e-124
ENSMUSG00000031216	236920	Stard8	-1.32406	1.00268e-49		ENSMUSG00000048752	235631	Prss50	-1.54657	4.84668e-21
ENSMUSG00000066007	667666	Zfp600	-1.32299	1.20924e-59		ENSMUSG00000071937	23793	Adam25	-1.54534	0.00361839
ENSMUSG00000041624	234889	Gucy1a2	-1.32273	2.29813e-08		ENSMUSG00000036854	243912	Hspb6	-1.54466	4.77416e-66
ENSMUSG00000024697	14675	Gna14	-1.32128	3.20957e-20		ENSMUSG00000024451	106952	Arap3	-1.54464	4.18935e-24
ENSMUSG00000058183	27390	Mmel1	-1.32058	1.12077e-12		ENSMUSG00000060487	320825	Samd5	-1.54297	0.00311465
ENSMUSG00000070880	14415	Gad1	-1.31953	8.31978e-07		ENSMUSG00000035864	20979	Syt1	-1.54215	0.000620478
ENSMUSG00000030413	21946	Pglyrp1	-1.31733	0.0132523		ENSMUSG00000029168	65254	Dpysl5	-1.53874	1.86391e-48
ENSMUSG00000019256	11622	Ahr	-1.31621	1.77721e-26		ENSMUSG00000084915	100532730	C230037L18Rik	-1.5362	5.83532e-06
ENSMUSG00000029452	77462	Tmem116	-1.31274	2.02878e-05		ENSMUSG00000018570	70419	2810408A11Rik	-1.53605	1.51749e-25
ENSMUSG00000036218	239618	Pdzrn4	-1.31236	0.0176863		ENSMUSG00000025701	11689	Alox5	-1.53471	7.42108e-13
ENSMUSG00000025915	170755	Sgk3	-1.31183	2.49774e-46		ENSMUSG00000051113	75538	Fam71e1	-1.53034	0.00110393
ENSMUSG00000024501	22240	Dpysl3	-1.31152	2.15552e-95		ENSMUSG00000025020	20562	Slit1	-1.52947	7.23826e-06
ENSMUSG00000021609	13162	Slc6a3	-1.31126	0.0146643		ENSMUSG00000020241	12834	Col6a2	-1.52662	3.78754e-05
ENSMUSG00000026972	215705	Arrdc1	-1.31004	1.49285e-31		ENSMUSG00000073406	14963	H2-Bl	-1.52592	3.74601e-11
ENSMUSG00000032591	15235	Mst1	-1.30844	1.44545e-08		ENSMUSG00000027955	68659	Fam198b	-1.52509	1.73742e-51
ENSMUSG00000038276	171209	Asic3	-1.30626	0.00873421		ENSMUSG00000021983	50769	Atp8a2	-1.52475	1.68517e-05
ENSMUSG00000018102	68024	Hist1h2bc	-1.30398	1.97041e-15		ENSMUSG00000041817	320557	Fam169a	-1.52417	8.57122e-189
ENSMUSG00000042417	218630	Ccno	-1.30363	1.54271e-05		ENSMUSG00000100599	73600	1700120C14Rik	-1.52417	0.000306557
ENSMUSG00000031627	16363	Irf2	-1.30169	0.00920994		ENSMUSG00000029123	64293	Stk32b	-1.52255	0.00308806
ENSMUSG00000058740	227632	Kcnt1	-1.30107	3.54791e-06		ENSMUSG00000020656	195733	Grhl1	-1.51975	1.00912e-49
ENSMUSG00000045835	15192	Hdgfl1	-1.30028	0.0160385		ENSMUSG00000014361	17289	Mertk	-1.51931	4.11843e-25
ENSMUSG00000006642	69852	Tcf23	-1.2999	0.000586188		ENSMUSG00000060548	29820	Tnfrsf19	-1.51716	4.61098e-26
ENSMUSG00000064307	69358	Lrrc51	-1.29948	4.73093e-06		ENSMUSG00000096956	100616095	Snhg18	-1.51672	3.09962e-05
ENSMUSG00000019785	215890	Clvs2	-1.2969	3.21534e-11		ENSMUSG00000022102	13449	Dok2	-1.51351	7.17606e-27
ENSMUSG00000035864	20979	Syt1	-1.2958	0.00229494		ENSMUSG00000036585	14164	Fgf1	-1.51268	1.00867e-26
ENSMUSG00000045991	225631	Onecut2	-1.2947	2.90548e-11		ENSMUSG00000021703	218442	Serinc5	-1.51224	1.20537e-64
ENSMUSG00000069072	241919	Slc7a14	-1.29458	0.0109312		ENSMUSG00000036882	233071	Arhgap33	-1.51062	2.78115e-25
ENSMUSG00000004347	18575	Pde1c	-1.2943	0.00926875		ENSMUSG00000025075	226243	Habp2	-1.51009	0.000306692
ENSMUSG00000051652	237387	Lrrc3	-1.29317	2.0755e-22		ENSMUSG00000079173	22635	Zan	-1.50933	1.6124e-08
ENSMUSG00000030406	381853	Gipr	-1.29114	1.17254e-14		ENSMUSG00000038670	233199	Mybpc2	-1.50899	2.52507e-13
ENSMUSG00000036030	235472	Prtg	-1.29106	3.60241e-43		ENSMUSG00000045007	103768	Tubg2	-1.50877	3.41673e-06
ENSMUSG00000063632	20666	Sox11	-1.29064	2.056e-51		ENSMUSG00000027570	12841	Col9a3	-1.5086	3.52956e-19
ENSMUSG00000019838	72472	Slc16a10	-1.28941	9.2484e-19		ENSMUSG00000046718	69550	Bst2	-1.50845	1.7509e-130
ENSMUSG00000052981	76980	Ube2ql1	-1.28844	0.0138342		ENSMUSG00000074345	244882	Tnfaip8l3	-1.50732	0.000820231
ENSMUSG00000035799	22160	Twist1	-1.28828	1.51151e-13		ENSMUSG00000084989	381284	Crocc2	-1.50723	6.41831e-35
ENSMUSG00000005802	22785	Slc30a4	-1.28557	9.03333e-41		ENSMUSG00000034664	16399	Itga2b	-1.50709	1.98148e-13
ENSMUSG00000037762	66859	Slc16a9	-1.28377	1.1306e-09		ENSMUSG00000022061	18095	Nkx3-1	-1.50209	3.84059e-12
ENSMUSG00000024909	58859	Efemp2	-1.28246	1.29834e-22		ENSMUSG00000040189	211535	Ccdc114	-1.50062	7.32459e-61
ENSMUSG00000033191	21846	Tie1	-1.28175	0.000295443		ENSMUSG00000055045	791423	Gm11190	-1.5005	0.000153684
ENSMUSG00000036913	330863	Trim67	-1.28158	0.0037899		ENSMUSG00000032035	23871	Ets1	-1.49999	1.70028e-14
ENSMUSG00000093565	75614	Rab26os	-1.28123	5.67483e-10		ENSMUSG00000015932	56431	Dstn	-1.49877	7.52782e-286
ENSMUSG00000040564	11812	Apoc1	-1.27992	1.9058e-32		ENSMUSG00000013921	76686	Clip3	-1.49731	2.36724e-71
ENSMUSG00000041372	330406	B4galnt3	-1.277	2.63364e-81		ENSMUSG00000075514	433408	Gm13375	-1.49663	2.00852e-12
ENSMUSG00000085601	243866	Gm4969	-1.27567	7.74493e-05		ENSMUSG00000036913	330863	Trim67	-1.49134	0.00146585
ENSMUSG00000048965	244238	Mrgpre	-1.27551	0.00835316		ENSMUSG00000034845	84094	Plvap	-1.49083	1.21441e-18
ENSMUSG00000041180	226098	Hectd2	-1.27345	9.29988e-21		ENSMUSG00000045968	240817	Teddm2	-1.49055	5.11846e-05
ENSMUSG00000028289	13841	Epha7	-1.27221	1.95358e-11		ENSMUSG00000031626	234214	Sorbs2	-1.48992	5.37827e-07
ENSMUSG00000028940	15206	Hes2	-1.2719	3.23781e-05		ENSMUSG00000028640	21420	Tfap2c	-1.48798	3.59016e-138
ENSMUSG00000024883	225870	Rin1	-1.27179	6.83273e-22		ENSMUSG00000050821	78408	Fam131a	-1.4864	1.01851e-08
ENSMUSG00000028573	75578	Fggy	-1.27061	1.30817e-18		ENSMUSG00000037411	18787	Serpine1	-1.48635	4.01173e-27
ENSMUSG00000056185	225861	Snx32	-1.26888	9.74833e-09		ENSMUSG00000026791	56017	Slc2a8	-1.48626	4.88736e-80
ENSMUSG00000023911	76917	Flywch2	-1.26869	4.54846e-13		ENSMUSG00000042632	53357	Pla2g6	-1.48523	1.84401e-247
ENSMUSG00000070604	75690	Vsig10l	-1.2678	5.6621e-12		ENSMUSG00000042106	68176	Fam212a	-1.48506	1.52259e-05
ENSMUSG00000039457	19041	Ppl	-1.26765	6.14228e-23		ENSMUSG00000055882	241850	Abhd16b	-1.48487	0.0103942
ENSMUSG00000078815	54378	Cacng6	-1.26713	4.15242e-19		ENSMUSG00000030707	12721	Coro1a	-1.48427	4.31028e-25
ENSMUSG00000074794	105171	Arrdc3	-1.26711	5.68957e-142		ENSMUSG00000022574	223646	Naprt	-1.48416	7.65668e-89
ENSMUSG00000024921	67155	Smarca2	-1.26654	1.8754e-09		ENSMUSG00000041523	22269	Upk2	-1.48277	0.000412807
ENSMUSG00000097536	70040	2610037D02Rik	-1.2646	7.05797e-14		ENSMUSG00000085667	545681	Gm12992	-1.48189	1.28618e-15
ENSMUSG00000038244	320878	Mical2	-1.26402	6.55497e-08		ENSMUSG00000060985	214575	Tdrd5	-1.48147	3.21542e-17
ENSMUSG00000018554	53422	Ybx2	-1.26309	3.6978e-36		ENSMUSG00000010760	22113	Phlda2	-1.4783	1.24727e-120
ENSMUSG00000039470	70546	Zdhhc2	-1.26205	2.05291e-20		ENSMUSG00000027075	72401	Slc43a1	-1.47516	5.17575e-31
ENSMUSG00000046718	69550	Bst2	-1.26173	5.64979e-94		ENSMUSG00000040554	114230	Aipl1	-1.47477	0.00460807
ENSMUSG00000036718	231830	Micall2	-1.25956	2.3944e-12		ENSMUSG00000056043	243923	Rgs9bp	-1.47328	4.67373e-37
ENSMUSG00000057378	20192	Ryr3	-1.25946	1.63571e-07		ENSMUSG00000030124	16768	Lag3	-1.47314	8.89679e-10
ENSMUSG00000038112	244810	AW551984	-1.25919	1.07974e-09		ENSMUSG00000074862	268319	BC025920	-1.47277	2.00744e-11
ENSMUSG00000020905	216835	Usp43	-1.2585	1.11879e-17		ENSMUSG00000025069	68214	Gsto2	-1.47167	0.00232579
ENSMUSG00000052560	66871	Cpne8	-1.25821	2.66446e-13		ENSMUSG00000098488	211429	Pla2g4b	-1.47028	5.37968e-07
ENSMUSG00000048616	18121	Nog	-1.25807	0.000368073		ENSMUSG00000041046	56089	Ramp3	-1.46947	3.82532e-37
ENSMUSG00000002847	85031	Pla1a	-1.25771	3.92734e-12		ENSMUSG00000041423	68957	Paqr6	-1.46834	1.73934e-06
ENSMUSG00000028536	66451	2610528J11Rik	-1.25766	0.000129123		ENSMUSG00000051224	245695	Tceanc	-1.46718	2.57264e-24
ENSMUSG00000033063	238680	Cntnap3	-1.25752	1.77977e-05		ENSMUSG00000039715	71820	Wdr34	-1.46494	1.88963e-99
ENSMUSG00000003746	17155	Man1a	-1.25688	4.8131e-18		ENSMUSG00000040828	106757	Catsperd	-1.46417	2.29756e-07
ENSMUSG00000055373	14348	Fut9	-1.25565	2.79636e-38		ENSMUSG00000040627	11628	Aicda	-1.46352	0.000864539
ENSMUSG00000004665	12798	Cnn2	-1.25553	1.64139e-106		ENSMUSG00000002043	67091	Trappc6a	-1.46329	1.78345e-55
ENSMUSG00000017754	18830	Pltp	-1.25482	1.87245e-116		ENSMUSG00000087651	69784	1500009L16Rik	-1.46117	2.34899e-64
ENSMUSG00000050295	17300	Foxc1	-1.25348	0.0141663		ENSMUSG00000037499	66208	Nenf	-1.46112	8.64332e-25
ENSMUSG00000022884	13682	Eif4a2	-1.25212	0		ENSMUSG00000044548	59036	Dact1	-1.45987	3.73118e-34
ENSMUSG00000051582	408193	Otud6a	-1.2517	5.20669e-06		ENSMUSG00000059493	195727	Nhs	-1.45844	2.92994e-46
ENSMUSG00000075296	621603	Aldh3b2	-1.25081	0.0079539		ENSMUSG00000021278	93835	Amn	-1.45775	6.04639e-19
ENSMUSG00000030350	381813	Prmt8	-1.24978	8.42542e-20		ENSMUSG00000055963	208820	Triqk	-1.45752	1.42088e-06
ENSMUSG00000070106	723852	Mir363	-1.24894	0.00223106		ENSMUSG00000031090	78914	Nadsyn1	-1.4564	4.28519e-26
ENSMUSG00000051159	12705	Cited1	-1.24855	0.000107213		ENSMUSG00000029154	231293	Cwh43	-1.45537	0.00386712
ENSMUSG00000034917	27375	Tjp3	-1.24844	6.3433e-50		ENSMUSG00000022231	20356	Sema5a	-1.45416	1.57778e-06
ENSMUSG00000070564	243967	Ntn5	-1.24759	0.000759913		ENSMUSG00000050989	74777	Selenon	-1.45413	1.00225e-35
ENSMUSG00000066892	30843	Fbxl12	-1.24711	2.40389e-59		ENSMUSG00000046287	245468	Pnma3	-1.45401	0.00756482
ENSMUSG00000030074	232313	Gxylt2	-1.24671	0.0116678		ENSMUSG00000021680	12919	Crhbp	-1.45388	1.72561e-05
ENSMUSG00000022286	252973	Grhl2	-1.24522	6.81886e-66		ENSMUSG00000078689	620807	Mup6	-1.45382	2.64031e-10
ENSMUSG00000037469	101744	Acp7	-1.24493	5.48271e-06		ENSMUSG00000064796	21748	Terc	-1.45344	0.000976419
ENSMUSG00000025038	74405	Efhc2	-1.24424	5.71892e-13		ENSMUSG00000071113	234155	Mboat4	-1.45129	0.00381054
ENSMUSG00000021879	110083	Dnah12	-1.24405	1.22946e-05		ENSMUSG00000057766	225187	Ankrd29	-1.45038	0.0126513
ENSMUSG00000051811	333182	Cox6b2	-1.24351	5.37433e-83		ENSMUSG00000019838	72472	Slc16a10	-1.45024	6.00459e-23
ENSMUSG00000019124	69938	Scrn1	-1.24174	5.1424e-29		ENSMUSG00000034156	207777	Tspoap1	-1.44951	4.6026e-13
ENSMUSG00000027956	70652	Tmem144	-1.24097	5.83789e-34		ENSMUSG00000026824	16519	Kcnj3	-1.4488	2.99205e-21
ENSMUSG00000073680	320587	Tmem88b	-1.24014	0.00207539		ENSMUSG00000022382	22422	Wnt7b	-1.44603	2.43561e-23
ENSMUSG00000003992	66970	Ssbp2	-1.23902	4.24765e-09		ENSMUSG00000022203	13644	Efs	-1.44551	4.71243e-96
ENSMUSG00000026712	17533	Mrc1	-1.23859	4.17464e-20		ENSMUSG00000039720	76615	Got1l1	-1.44477	6.02409e-54
ENSMUSG00000036395	244757	Glb1l2	-1.23783	4.56013e-09		ENSMUSG00000022756	224022	Slc7a4	-1.44474	3.96826e-14
ENSMUSG00000052087	51791	Rgs14	-1.23758	2.24638e-07		ENSMUSG00000051527	57775	Usp29	-1.44151	2.4247e-07
ENSMUSG00000085024	320842	C230035I16Rik	-1.23628	0.00104777		ENSMUSG00000091994	414101	E130317F20Rik	-1.4407	2.19732e-08
ENSMUSG00000072893	74476	4933439C10Rik	-1.23546	3.24809e-09		ENSMUSG00000059540	21400	Tcea2	-1.43996	9.4699e-27
ENSMUSG00000000037	107815	Scml2	-1.23544	7.4393e-13		ENSMUSG00000023905	27279	Tnfrsf12a	-1.43937	1.23453e-44
ENSMUSG00000050373	101113	Snx21	-1.2342	1.17154e-10		ENSMUSG00000029186	67073	Pi4k2b	-1.439	1.78007e-118
ENSMUSG00000028555	230603	Ttc39a	-1.23339	2.07116e-08		ENSMUSG00000028518	108079	Prkaa2	-1.43774	6.29357e-87
ENSMUSG00000026655	66540	Fam107b	-1.23171	4.56495e-33		ENSMUSG00000026972	215705	Arrdc1	-1.43762	2.25566e-37
ENSMUSG00000047674	18598	Pdha2	-1.2312	5.17163e-05		ENSMUSG00000038393	56338	Txnip	-1.4341	6.45631e-211
ENSMUSG00000029571	71900	Tmem106b	-1.23009	9.17987e-70		ENSMUSG00000079608	170461	Stard6	-1.43371	0.000263717
ENSMUSG00000028865	69655	Cd164l2	-1.22874	1.19465e-05		ENSMUSG00000024659	16952	Anxa1	-1.4335	2.30569e-23
ENSMUSG00000077797	100217423	Snord19	-1.22787	1.99542e-05		ENSMUSG00000033470	70086	Cysltr2	-1.4331	2.6956e-10
ENSMUSG00000027078	56791	Ube2l6	-1.22621	3.84605e-06		ENSMUSG00000035852	78906	Misp	-1.43264	3.11005e-08
ENSMUSG00000018566	20528	Slc2a4	-1.22562	2.30506e-13		ENSMUSG00000033949	28105	Trim36	-1.43074	4.14173e-15
ENSMUSG00000060961	54403	Slc4a4	-1.22524	3.06334e-09		ENSMUSG00000037335	15110	Hand1	-1.43005	5.36683e-07
ENSMUSG00000051397	56753	Tacstd2	-1.22476	0.00951812		ENSMUSG00000046378	233879	Asphd1	-1.42972	1.19283e-05
ENSMUSG00000029103	16976	Lrpap1	-1.2247	7.45012e-140		ENSMUSG00000020607	105005	Fam84a	-1.42926	0.000202844
ENSMUSG00000079037	19122	Prnp	-1.22449	2.42333e-34		ENSMUSG00000001751	27419	Naglu	-1.42795	2.53911e-20
ENSMUSG00000028211	60599	Trp53inp1	-1.22448	2.64986e-248		ENSMUSG00000041957	67451	Pkp2	-1.42775	4.07904e-133
ENSMUSG00000050050	320696	Ccdc158	-1.22448	2.04599e-10		ENSMUSG00000053070	234912	9230110C19Rik	-1.42766	7.69166e-22
ENSMUSG00000032374	26432	Plod2	-1.22395	3.64365e-134		ENSMUSG00000018102	68024	Hist1h2bc	-1.42612	5.36231e-18
ENSMUSG00000022505	13731	Emp2	-1.22234	3.13869e-24		ENSMUSG00000064938	100526546	Mir3068	-1.42539	0.00732177
ENSMUSG00000097072	768252	Foxl2os	-1.22222	0.00760167		ENSMUSG00000021032	64242	Ngb	-1.42528	0.0060031
ENSMUSG00000073599	68545	Ecscr	-1.22209	0.000174605		ENSMUSG00000040729	234915	Cep126	-1.42423	1.34372e-29
ENSMUSG00000016262	214791	Sertad4	-1.22162	6.52651e-07		ENSMUSG00000062859	21463	Tcp11	-1.42306	4.27118e-19
ENSMUSG00000032009	75747	Sesn3	-1.22091	5.1596e-45		ENSMUSG00000035948	380660	Acss3	-1.42152	0.0011219
ENSMUSG00000029484	11745	Anxa3	-1.22086	3.93709e-28		ENSMUSG00000020467	216616	Efemp1	-1.42141	0.00140136
ENSMUSG00000024013	26382	Fgd2	-1.2199	0.0130505		ENSMUSG00000020639	382562	Pfn4	-1.42124	1.8203e-05
ENSMUSG00000056145	229694	AI504432	-1.21785	0.00266851		ENSMUSG00000024011	74116	Pi16	-1.42057	0.00108541
ENSMUSG00000028152	56224	Tspan5	-1.21757	1.96307e-56		ENSMUSG00000028971	12854	Cort	-1.42045	2.16072e-05
ENSMUSG00000024548	240427	Setbp1	-1.21732	1.45398e-14		ENSMUSG00000031170	209837	Slc38a5	-1.42043	5.90493e-05
ENSMUSG00000036561	71474	Ppp6r2	-1.21717	4.72201e-28		ENSMUSG00000002083	170770	Bbc3	-1.41865	1.05471e-119
ENSMUSG00000025185	67573	Loxl4	-1.2171	5.40773e-05		ENSMUSG00000032177	18577	Pde4a	-1.41606	2.11799e-55
ENSMUSG00000028480	384009	Glipr2	-1.21611	1.32435e-71		ENSMUSG00000046000	97243	Naa11	-1.41495	1.20596e-58
ENSMUSG00000037661	71862	Gpr160	-1.21608	1.03432e-18		ENSMUSG00000040699	67803	Limd2	-1.4147	3.99434e-57
ENSMUSG00000033542	54324	Arhgef5	-1.21592	8.58292e-27		ENSMUSG00000018672	56358	Copz2	-1.41438	1.06289e-05
ENSMUSG00000033214	75409	Slitrk5	-1.2153	7.05938e-07		ENSMUSG00000078938	75459	Syce3	-1.41401	0.000283339
ENSMUSG00000093661	66892	Eif4e3	-1.21401	1.88524e-05		ENSMUSG00000038756	237930	Ttll6	-1.41188	7.29193e-19
ENSMUSG00000028517	67916	Plpp3	-1.21395	5.46449e-70		ENSMUSG00000033882	633285	Rbm46	-1.40992	7.53426e-08
ENSMUSG00000021638	18260	Ocln	-1.21336	3.22723e-21		ENSMUSG00000097709	76937	2810429I04Rik	-1.40955	7.02602e-21
ENSMUSG00000054662	71345	Ano9	-1.21161	3.72548e-65		ENSMUSG00000038112	244810	AW551984	-1.40732	1.56404e-11
ENSMUSG00000073077	636104	Gm7173	-1.21092	0.000585894		ENSMUSG00000004665	12798	Cnn2	-1.40716	5.41129e-132
ENSMUSG00000035722	27403	Abca7	-1.21078	2.59742e-52		ENSMUSG00000018566	20528	Slc2a4	-1.40698	9.1034e-17
ENSMUSG00000061259	231382	Tmprss11d	-1.20983	0.000359174		ENSMUSG00000092981	100628593	Mir5125	-1.40616	2.07479e-16
ENSMUSG00000042272	228071	Sestd1	-1.20981	6.81621e-76		ENSMUSG00000001700	107022	Gramd3	-1.40521	3.27491e-22
ENSMUSG00000033470	70086	Cysltr2	-1.20893	5.0759e-08		ENSMUSG00000028337	107684	Coro2a	-1.40487	1.11468e-20
ENSMUSG00000022453	17939	Naga	-1.20828	2.63086e-40		ENSMUSG00000020461	73324	Clhc1	-1.40436	0.0066808
ENSMUSG00000029022	28010	Miip	-1.20826	7.62426e-66		ENSMUSG00000022429	13404	Dmc1	-1.40291	1.24269e-24
ENSMUSG00000074277	232970	Phldb3	-1.20798	4.04543e-06		ENSMUSG00000006724	13115	Cyp27b1	-1.40212	1.80215e-07
ENSMUSG00000039913	241656	Pak7	-1.20723	0.00954909		ENSMUSG00000006476	56876	Nsmf	-1.40179	7.93315e-23
ENSMUSG00000020059	20962	Sycp3	-1.20674	1.10925e-45		ENSMUSG00000046826	76415	Fam187b	-1.40084	0.000759854
ENSMUSG00000028195	16007	Cyr61	-1.20642	1.11214e-59		ENSMUSG00000055409	338352	Nell1	-1.40044	0.000323656
ENSMUSG00000027478	13436	Dnmt3b	-1.20628	1.03747e-245		ENSMUSG00000098678	223645	Mroh6	-1.39993	1.23929e-14
ENSMUSG00000025790	108116	Slco3a1	-1.20608	1.09242e-11		ENSMUSG00000003948	67468	Mmd	-1.39781	2.92167e-34
ENSMUSG00000030653	207728	Gm45837	-1.20604	2.01574e-16		ENSMUSG00000025081	83561	Tdrd1	-1.39761	3.92169e-12
ENSMUSG00000053040	68318	Aph1c	-1.20603	7.67712e-05		ENSMUSG00000070407	54710	Hs3st3b1	-1.39453	8.01848e-26
ENSMUSG00000030098	243547	Grip2	-1.20582	3.1312e-06		ENSMUSG00000029553	21426	Tfec	-1.39201	0.00234439
ENSMUSG00000039021	338348	Ttc16	-1.20419	0.000165753		ENSMUSG00000049916	70458	2610318N02Rik	-1.39194	1.68668e-140
ENSMUSG00000005897	22025	Nr2c1	-1.20415	2.39886e-34		ENSMUSG00000056735	109202	A930024E05Rik	-1.39144	6.94403e-17
ENSMUSG00000032358	208994	Fam83b	-1.20353	1.40474e-09		ENSMUSG00000038600	140494	Atp6v0a4	-1.39016	2.80494e-08
ENSMUSG00000035126	242584	Wdr78	-1.20271	2.92187e-07		ENSMUSG00000039982	207521	Dtx4	-1.38879	8.1192e-31
ENSMUSG00000032368	22771	Zic1	-1.20242	0.0131265		ENSMUSG00000063229	16828	Ldha	-1.38798	1.54896e-288
ENSMUSG00000071719	620592	Tmem28	-1.20214	1.83995e-32		ENSMUSG00000097785	320879	B230217O12Rik	-1.38787	0.000196415
ENSMUSG00000030376	110891	Slc8a2	-1.20106	7.42538e-23		ENSMUSG00000032623	100535	Oas1d	-1.38642	0.000789112
ENSMUSG00000052301	13446	Doc2a	-1.20034	5.89206e-18		ENSMUSG00000059049	329872	Frem1	-1.3849	0.00519552
ENSMUSG00000022875	16644	Kng1	-1.19903	0.00731107		ENSMUSG00000035486	216166	Plk5	-1.38477	5.42997e-38
ENSMUSG00000032268	80893	Tmprss5	-1.19881	1.02304e-08		ENSMUSG00000025429	19201	Pstpip2	-1.38447	4.36897e-18
ENSMUSG00000071550	212517	Cfap44	-1.19698	0.00299234		ENSMUSG00000097207	320719	6030443J06Rik	-1.38409	1.20419e-09
ENSMUSG00000057948	70450	Unc13d	-1.19658	3.07224e-10		ENSMUSG00000032816	56741	Igdcc4	-1.38326	8.35921e-49
ENSMUSG00000032816	56741	Igdcc4	-1.19644	2.21451e-37		ENSMUSG00000018451	103712	6330403K07Rik	-1.38149	0.00136463
ENSMUSG00000001506	12842	Col1a1	-1.19509	1.2709e-14		ENSMUSG00000020648	71916	Dus4l	-1.38062	1.01675e-53
ENSMUSG00000059939	230996	9430015G10Rik	-1.19491	9.87558e-113		ENSMUSG00000028871	192199	Rspo1	-1.38014	4.30938e-12
ENSMUSG00000032231	12306	Anxa2	-1.19477	2.35486e-39		ENSMUSG00000038168	210530	P3h2	-1.38012	2.67475e-05
ENSMUSG00000086841	69221	2410006H16Rik	-1.19422	1.31641e-72		ENSMUSG00000028845	24084	Tekt2	-1.37972	7.59498e-09
ENSMUSG00000086782	77866	E130102H24Rik	-1.19418	1.81223e-06		ENSMUSG00000024663	74760	Rab3il1	-1.37906	1.96342e-40
ENSMUSG00000043811	65079	Rtn4r	-1.19406	0.00338789		ENSMUSG00000028392	192120	Bspry	-1.37693	1.33977e-49
ENSMUSG00000023912	74011	Slc25a27	-1.19333	2.08047e-12		ENSMUSG00000040372	81006	Gpr63	-1.37619	2.06508e-05
ENSMUSG00000038128	12326	Camk4	-1.19257	2.87045e-08		ENSMUSG00000040213	229905	Kyat3	-1.37474	1.31999e-43
ENSMUSG00000097493	320469	9930014A18Rik	-1.18791	7.10564e-05		ENSMUSG00000021798	24131	Ldb3	-1.37379	3.35826e-15
ENSMUSG00000040272	329470	Accs	-1.18744	1.0707e-10		ENSMUSG00000046408	73453	1700067K01Rik	-1.37124	1.26321e-05
ENSMUSG00000005986	68423	Ankrd13d	-1.18551	2.5745e-16		ENSMUSG00000021725	52552	Parp8	-1.37027	0.000261632
ENSMUSG00000032375	208117	Aph1b	-1.18448	0.000328487		ENSMUSG00000069273	319151	Hist1h3e	-1.37001	0.00102488
ENSMUSG00000032839	22063	Trpc1	-1.18292	1.69019e-09		ENSMUSG00000068854	319190	Hist2h2be	-1.36992	3.06973e-07
ENSMUSG00000021589	73296	Rhobtb3	-1.18289	1.12123e-33		ENSMUSG00000027489	56846	Necab3	-1.36836	1.0504e-22
ENSMUSG00000029032	230972	Arhgef16	-1.18161	5.01631e-34		ENSMUSG00000075595	268469	Zfp652	-1.36669	3.02309e-205
ENSMUSG00000004267	13807	Eno2	-1.18136	8.24756e-22		ENSMUSG00000038418	13653	Egr1	-1.36586	4.01033e-18
ENSMUSG00000028841	194231	Cnksr1	-1.18107	4.42211e-10		ENSMUSG00000051177	18795	Plcb1	-1.36488	4.99124e-09
ENSMUSG00000000792	114479	Slc5a5	-1.18044	1.05088e-12		ENSMUSG00000036214	76416	Znrd1as	-1.36414	1.04793e-51
ENSMUSG00000000753	20317	Serpinf1	-1.18042	3.41919e-07		ENSMUSG00000030494	52428	Rhpn2	-1.36352	9.00013e-55
ENSMUSG00000021779	21834	Thrb	-1.17985	0.00316167		ENSMUSG00000023805	20975	Synj2	-1.36269	5.80143e-51
ENSMUSG00000017677	78889	Wsb1	-1.17976	1.92448e-143		ENSMUSG00000034482	114652	Ly6g5c	-1.36255	8.22631e-05
ENSMUSG00000040410	269514	Fbxl4	-1.17964	1.24137e-24		ENSMUSG00000029605	23961	Oas1b	-1.36172	0.0035257
ENSMUSG00000056413	231821	Adap1	-1.17827	1.60375e-115		ENSMUSG00000100863	620016	Gm12669	-1.36127	1.84291e-05
ENSMUSG00000022947	109857	Cbr3	-1.17755	1.0366e-73		ENSMUSG00000014198	278304	Zfp385c	-1.36057	4.39052e-06
ENSMUSG00000028020	14658	Glrb	-1.17751	2.52752e-08		ENSMUSG00000019256	11622	Ahr	-1.35946	2.42233e-28
ENSMUSG00000087159	101055907	Gm15246	-1.17717	0.000103774		ENSMUSG00000031112	70415	Stk26	-1.35897	2.42006e-37
ENSMUSG00000054099	319653	Slc25a40	-1.17675	4.26573e-88		ENSMUSG00000041609	75665	Bicdl1	-1.35873	7.57221e-68
ENSMUSG00000032359	13036	Ctsh	-1.17634	0.000118518		ENSMUSG00000030421	19777	Uri1	-1.35717	0
ENSMUSG00000037211	24063	Spry1	-1.17577	2.79897e-68		ENSMUSG00000042564	75729	Fam227a	-1.35568	0.000353662
ENSMUSG00000027102	15437	Hoxd8	-1.17566	0.0136308		ENSMUSG00000043456	243937	Zfp536	-1.35562	9.43447e-06
ENSMUSG00000035773	114229	Kiss1r	-1.17538	0.0016287		ENSMUSG00000058385	319181	Hist1h2bg	-1.3555	0.0119947
ENSMUSG00000038608	210293	Dock10	-1.17087	5.69296e-05		ENSMUSG00000048058	241576	Ldlrad3	-1.3549	1.33206e-106
ENSMUSG00000022105	19645	Rb1	-1.16855	2.23322e-56		ENSMUSG00000088054	100316713	Mir1968	-1.35361	0.00028026
ENSMUSG00000047798	246746	Cd300lf	-1.16769	0.00157909		ENSMUSG00000050917	14175	Fgf4	-1.35261	7.81738e-287
ENSMUSG00000046318	320924	Ccbe1	-1.1671	0.00210283		ENSMUSG00000026712	17533	Mrc1	-1.35196	1.69696e-23
ENSMUSG00000034401	67946	Spata6	-1.16699	2.17902e-33		ENSMUSG00000039450	67880	Dcxr	-1.35099	1.05247e-52
ENSMUSG00000000632	20370	Sez6	-1.16686	7.43011e-08		ENSMUSG00000047798	246746	Cd300lf	-1.35056	0.000457733
ENSMUSG00000038781	106766	Stap2	-1.16607	1.81391e-13		ENSMUSG00000003344	208198	Btbd2	-1.35053	4.51071e-172
ENSMUSG00000078566	12176	Bnip3	-1.16585	7.32397e-40		ENSMUSG00000027227	20322	Sord	-1.34919	7.37497e-123
ENSMUSG00000032514	74052	Ttc21a	-1.16494	1.22611e-05		ENSMUSG00000016206	14991	H2-M3	-1.34917	9.53084e-07
ENSMUSG00000029426	12492	Scarb2	-1.16419	2.00475e-157		ENSMUSG00000027660	20482	Skil	-1.34786	6.72307e-180
ENSMUSG00000004952	54153	Rasa4	-1.16317	4.70385e-42		ENSMUSG00000037033	229927	Clca3b	-1.34747	1.33607e-30
ENSMUSG00000053897	67547	Slc39a8	-1.16314	9.4505e-05		ENSMUSG00000027669	14696	Gnb4	-1.34674	3.71792e-41
ENSMUSG00000032267	235323	Usp28	-1.16236	1.67179e-224		ENSMUSG00000097617	100038560	Gm10687	-1.34634	0.000122839
ENSMUSG00000024085	17158	Man2a1	-1.16078	9.07926e-117		ENSMUSG00000059554	215814	Ccdc28a	-1.34591	5.94072e-23
ENSMUSG00000049281	235281	Scn3b	-1.1603	6.23122e-18		ENSMUSG00000055862	71564	Izumo4	-1.34367	9.01788e-09
ENSMUSG00000028246	76132	Faxc	-1.16012	5.10283e-08		ENSMUSG00000045394	17075	Epcam	-1.34297	1.46967e-287
ENSMUSG00000078851	319162	Hist3h2a	-1.1588	3.77862e-08		ENSMUSG00000018427	77864	Ypel2	-1.34192	2.90258e-51
ENSMUSG00000022292	382985	Rrm2b	-1.15723	4.07376e-25		ENSMUSG00000079029	435337	Gm5662	-1.34175	3.84239e-15
ENSMUSG00000004113	12287	Cacna1b	-1.15698	2.73769e-13		ENSMUSG00000028158	17777	Mttp	-1.33903	2.54936e-25
ENSMUSG00000003872	22342	Lin7b	-1.15544	3.78401e-05		ENSMUSG00000040447	216892	Spns2	-1.33834	3.67405e-09
ENSMUSG00000007038	18010	Neu1	-1.15543	9.18384e-68		ENSMUSG00000040752	17888	Myh6	-1.33777	2.9151e-20
ENSMUSG00000034949	103406	Zfr2	-1.15427	3.69116e-09		ENSMUSG00000001334	384061	Fndc5	-1.33523	3.72669e-10
ENSMUSG00000041935	106064	AW549877	-1.15413	2.44709e-164		ENSMUSG00000079428	100040972	Tceal7	-1.33373	4.78811e-12
ENSMUSG00000061482	319156	Hist1h4d	-1.15373	0.00539476		ENSMUSG00000096986	75115	4930509E16Rik	-1.33326	0.000134125
ENSMUSG00000027489	56846	Necab3	-1.15352	5.05204e-17		ENSMUSG00000050545	207921	Fam228b	-1.33326	1.35307e-09
ENSMUSG00000021668	27015	Polk	-1.15149	3.44258e-77		ENSMUSG00000022629	16564	Kif21a	-1.33304	1.01486e-45
ENSMUSG00000022270	66270	Retreg1	-1.15134	1.68184e-23		ENSMUSG00000094985	671232	Topaz1	-1.33145	6.62515e-05
ENSMUSG00000085148	100042498	Mir22hg	-1.15014	4.52087e-14		ENSMUSG00000037525	75284	Bcdin3d	-1.33104	2.86362e-30
ENSMUSG00000019997	14219	Ctgf	-1.14979	2.31572e-50		ENSMUSG00000055874	232077	Foxi3	-1.329	3.31347e-15
ENSMUSG00000024347	74002	Psd2	-1.14894	4.18581e-09		ENSMUSG00000054945	791294	Gm9958	-1.32779	0.000213574
ENSMUSG00000023795	328734	Pisd-ps2	-1.14869	0.00142548		ENSMUSG00000025489	73835	Ifitm5	-1.32737	1.01874e-05
ENSMUSG00000029735	29807	Tpk1	-1.14813	6.61006e-31		ENSMUSG00000070527	22652	Mkrn3	-1.32702	5.66163e-31
ENSMUSG00000068860	229588	Gm128	-1.14754	6.61933e-10		ENSMUSG00000024386	19123	Proc	-1.32672	0.000115744
ENSMUSG00000028689	68394	Ccdc163	-1.1473	5.15562e-26		ENSMUSG00000003436	13389	Dll3	-1.3262	4.45064e-14
ENSMUSG00000074796	269356	Slc4a11	-1.1473	2.13178e-38		ENSMUSG00000069255	105352	Dusp22	-1.32483	1.86305e-19
ENSMUSG00000045102	272158	Poln	-1.147	0.000854365		ENSMUSG00000106223	78648	2400006E01Rik	-1.32418	2.39859e-16
ENSMUSG00000008461	14343	Fut1	-1.14659	0.00052508		ENSMUSG00000089661	12587	Mia	-1.32414	0.000226842
ENSMUSG00000025232	15211	Hexa	-1.14584	4.05896e-115		ENSMUSG00000032890	242662	Rims3	-1.32158	6.59082e-60
ENSMUSG00000047242	407786	Taf9b	-1.14468	2.96164e-08		ENSMUSG00000018554	53422	Ybx2	-1.32105	1.49567e-39
ENSMUSG00000020154	19263	Ptprb	-1.14428	0.0132982		ENSMUSG00000090523	71683	Gypc	-1.32033	0.0107878
ENSMUSG00000000078	23849	Klf6	-1.1442	2.45612e-128		ENSMUSG00000032661	246727	Oas3	-1.31891	8.56511e-21
ENSMUSG00000028661	13842	Epha8	-1.14352	5.59505e-06		ENSMUSG00000038286	68021	Bphl	-1.31857	3.0306e-32
ENSMUSG00000026888	50915	Grb14	-1.1434	4.80261e-07		ENSMUSG00000057948	70450	Unc13d	-1.3174	5.97756e-12
ENSMUSG00000044317	319197	Gpr4	-1.14309	1.33838e-25		ENSMUSG00000053490	234329	Trim60	-1.31662	0.00163356
ENSMUSG00000040629	98558	Mael	-1.14294	6.75885e-38		ENSMUSG00000032232	68178	Cgnl1	-1.31644	1.15378e-71
ENSMUSG00000022564	66168	Grina	-1.14277	5.67073e-15		ENSMUSG00000023019	14555	Gpd1	-1.31311	0.000142375
ENSMUSG00000033318	14872	Gstt2	-1.1414	4.75768e-33		ENSMUSG00000032514	74052	Ttc21a	-1.31206	1.31132e-06
ENSMUSG00000020131	18551	Pcsk4	-1.14117	9.01899e-13		ENSMUSG00000020658	668212	Efr3b	-1.31158	4.44889e-32
ENSMUSG00000042942	381157	Greb1l	-1.14114	2.05945e-10		ENSMUSG00000061356	100503545	Nuggc	-1.31102	2.79783e-07
ENSMUSG00000042997	212114	Nhlrc3	-1.14055	1.9085e-54		ENSMUSG00000030134	70727	Rasgef1a	-1.31073	4.42641e-05
ENSMUSG00000024485	240215	Slc4a9	-1.14031	1.17774e-05		ENSMUSG00000034460	20474	Six4	-1.31033	1.49788e-142
ENSMUSG00000097769	100503380	Snhg4	-1.13839	1.05774e-49		ENSMUSG00000029231	18595	Pdgfra	-1.31027	6.29808e-37
ENSMUSG00000042359	99031	Osbpl6	-1.13836	5.50831e-08		ENSMUSG00000028480	384009	Glipr2	-1.31022	8.43923e-83
ENSMUSG00000029869	13848	Ephb6	-1.13779	9.20822e-08		ENSMUSG00000078607	69066	1810010H24Rik	-1.31013	3.45696e-05
ENSMUSG00000042724	338372	Map3k9	-1.13749	4.37794e-86		ENSMUSG00000034958	16467	Atcay	-1.30993	6.94294e-14
ENSMUSG00000000385	50528	Tmprss2	-1.13716	0.0227671		ENSMUSG00000020562	75040	Efcab10	-1.30966	0.002781
ENSMUSG00000029185	68303	Fam114a1	-1.13704	6.84919e-13		ENSMUSG00000040093	171543	Bmf	-1.30962	3.79626e-66
ENSMUSG00000043999	237716	Gpr75	-1.13588	4.64451e-05		ENSMUSG00000020728	76380	Cep112	-1.30809	1.31305e-10
ENSMUSG00000037653	243043	Kctd8	-1.13523	0.0094946		ENSMUSG00000000126	216795	Wnt9a	-1.30799	1.88518e-10
ENSMUSG00000098488	211429	Pla2g4b	-1.13471	5.49733e-05		ENSMUSG00000036523	268527	Greb1	-1.30771	5.60944e-10
ENSMUSG00000027238	228564	Frmd5	-1.13427	2.57781e-27		ENSMUSG00000066129	76484	Kndc1	-1.30751	2.83575e-51
ENSMUSG00000020599	19739	Rgs9	-1.13404	4.98595e-07		ENSMUSG00000043670	208666	Diras1	-1.30464	5.93763e-09
ENSMUSG00000046192	214704	Iqub	-1.13278	0.000371741		ENSMUSG00000047220	434438	Ccdc36	-1.30432	3.44594e-15
ENSMUSG00000042834	27528	Nrep	-1.13253	4.84885e-15		ENSMUSG00000036022	78755	Fam122b	-1.30348	2.27836e-104
ENSMUSG00000039704	320506	Lmbrd2	-1.13229	2.3695e-38		ENSMUSG00000040978	626870	Gm11992	-1.30342	0.00353463
ENSMUSG00000062753	106672	AI413582	-1.13217	1.02465e-11		ENSMUSG00000024247	106522	Pkdcc	-1.30303	2.65502e-10
ENSMUSG00000034647	106585	Ankrd12	-1.13208	3.14304e-46		ENSMUSG00000027276	16449	Jag1	-1.29927	9.83232e-41
ENSMUSG00000020902	18208	Ntn1	-1.1295	3.74842e-125		ENSMUSG00000029778	11517	Adcyap1r1	-1.2991	5.2095e-07
ENSMUSG00000100826	52480	Snhg14	-1.12933	1.07826e-69		ENSMUSG00000074923	214230	Pak6	-1.29722	1.59822e-18
ENSMUSG00000034460	20474	Six4	-1.12814	1.63724e-107		ENSMUSG00000018893	17189	Mb	-1.29657	0.00196758
ENSMUSG00000033059	110078	Pygb	-1.12776	1.17756e-56		ENSMUSG00000027474	228788	Ccm2l	-1.2962	9.01572e-06
ENSMUSG00000052271	17341	Bhlha15	-1.12765	8.47846e-09		ENSMUSG00000022150	13132	Dab2	-1.29586	1.05269e-39
ENSMUSG00000001349	12797	Cnn1	-1.12739	1.75409e-05		ENSMUSG00000016382	102866	Pls3	-1.29586	5.06544e-57
ENSMUSG00000036022	78755	Fam122b	-1.12696	2.0509e-79		ENSMUSG00000004948	22788	Zp3	-1.29548	1.48125e-13
ENSMUSG00000033713	71375	Foxn3	-1.12669	1.83613e-34		ENSMUSG00000030352	109246	Tspan9	-1.29382	1.3294e-89
ENSMUSG00000052544	20447	St6galnac3	-1.12629	6.86879e-17		ENSMUSG00000030554	233335	Synm	-1.2938	9.28132e-36
ENSMUSG00000057193	68682	Slc44a2	-1.12559	8.89857e-99		ENSMUSG00000022544	70511	Eef2kmt	-1.29349	1.00858e-76
ENSMUSG00000023845	240028	Lnpep	-1.12372	4.96e-43		ENSMUSG00000070577	230909	Gm572	-1.29349	0.0123483
ENSMUSG00000042510	212439	AA986860	-1.12369	8.21791e-05		ENSMUSG00000028088	14263	Fmo5	-1.29166	1.34104e-05
ENSMUSG00000005873	13476	Reep5	-1.12369	8.51302e-47		ENSMUSG00000025726	434203	Slc28a1	-1.2915	3.50825e-105
ENSMUSG00000000942	15401	Hoxa4	-1.12291	0.0145418		ENSMUSG00000026839	76654	Upp2	-1.29116	0.0205722
ENSMUSG00000036181	50708	Hist1h1c	-1.12258	2.85922e-12		ENSMUSG00000070639	433926	Lrrc8b	-1.28994	4.84397e-40
ENSMUSG00000019966	17311	Kitl	-1.12254	5.51679e-07		ENSMUSG00000052160	104759	Pld4	-1.28936	0.000621099
ENSMUSG00000039239	21808	Tgfb2	-1.12083	0.0157484		ENSMUSG00000029570	16848	Lfng	-1.28774	1.21029e-10
ENSMUSG00000019982	17863	Myb	-1.11992	2.32915e-11		ENSMUSG00000002068	12447	Ccne1	-1.28559	2.41256e-246
ENSMUSG00000043415	71198	Otud1	-1.11928	2.34262e-32		ENSMUSG00000039452	382083	Snx22	-1.28537	3.11208e-05
ENSMUSG00000024462	54393	Gabbr1	-1.11817	2.79818e-34		ENSMUSG00000024039	12411	Cbs	-1.28487	1.43953e-100
ENSMUSG00000002109	107986	Ddb2	-1.11538	8.90714e-31		ENSMUSG00000020604	74008	Arsg	-1.27882	2.75153e-08
ENSMUSG00000097195	72655	Snhg5	-1.11512	1.33943e-105		ENSMUSG00000079034	666806	Gm8300	-1.2781	1.3776e-10
ENSMUSG00000033080	114889	Vsx1	-1.1151	0.0370133		ENSMUSG00000052534	18514	Pbx1	-1.27808	1.76416e-48
ENSMUSG00000005373	58805	Mlxipl	-1.11486	3.32166e-21		ENSMUSG00000031962	12555	Cdh15	-1.2763	7.58311e-05
ENSMUSG00000031871	12562	Cdh5	-1.11425	0.000677017		ENSMUSG00000039759	69876	Thap3	-1.27569	6.74407e-26
ENSMUSG00000042734	69480	Ttc9	-1.11368	7.08327e-09		ENSMUSG00000047810	78317	Ccdc88b	-1.27551	7.28639e-11
ENSMUSG00000052396	233549	Mogat2	-1.11326	0.00846973		ENSMUSG00000034435	238257	Tmem30b	-1.27517	9.93754e-23
ENSMUSG00000027858	70747	Tspan2	-1.11302	3.24754e-16		ENSMUSG00000054723	106639	Vmac	-1.27452	8.61631e-56
ENSMUSG00000037902	19261	Sirpa	-1.11273	5.387e-15		ENSMUSG00000029249	19712	Rest	-1.27375	1.46821e-287
ENSMUSG00000046027	170460	Stard5	-1.11264	1.30809e-38		ENSMUSG00000093910	330230	Zfp853	-1.27153	0.00225377
ENSMUSG00000030525	11441	Chrna7	-1.11231	1.06046e-15		ENSMUSG00000022788	224014	Fgd4	-1.27138	1.07273e-28
ENSMUSG00000021665	15212	Hexb	-1.11213	8.90809e-98		ENSMUSG00000041703	65100	Zic5	-1.26756	4.70627e-38
ENSMUSG00000095115	319622	Itpripl2	-1.11202	1.84387e-15		ENSMUSG00000024530	225655	Prelid3a	-1.26642	1.32645e-10
ENSMUSG00000060176	75050	Kif27	-1.11194	0.00153009		ENSMUSG00000020053	16000	Igf1	-1.26582	0.00208883
ENSMUSG00000032511	20271	Scn5a	-1.11135	0.00319959		ENSMUSG00000034336	226180	Ina	-1.26316	1.03573e-121
ENSMUSG00000030257	259302	Srgap3	-1.11115	1.63256e-21		ENSMUSG00000027356	241639	Fermt1	-1.26275	2.44724e-08
ENSMUSG00000029999	21802	Tgfa	-1.1111	6.95719e-11		ENSMUSG00000025064	12821	Col17a1	-1.26069	1.50231e-11
ENSMUSG00000030352	109246	Tspan9	-1.11108	1.68491e-67		ENSMUSG00000000901	17385	Mmp11	-1.26027	3.78969e-100
ENSMUSG00000049387	78174	Cox7b2	-1.11101	0.00696104		ENSMUSG00000038816	54366	Ctnnal1	-1.25963	1.22703e-174
ENSMUSG00000005553	11944	Atp4a	-1.10919	2.97241e-09		ENSMUSG00000024497	18998	Pou4f3	-1.2585	0.00057328
ENSMUSG00000019989	209558	Enpp3	-1.10631	6.65035e-62		ENSMUSG00000037016	242022	Frem2	-1.2571	3.57027e-44
ENSMUSG00000062901	75785	Klhl24	-1.10579	1.26051e-107		ENSMUSG00000078853	16145	Igtp	-1.25681	0.000113545
ENSMUSG00000034377	68842	Tulp4	-1.10506	2.83491e-45		ENSMUSG00000020646	67216	Mboat2	-1.25678	5.96124e-43
ENSMUSG00000024754	83921	Tmem2	-1.10409	5.25589e-139		ENSMUSG00000027215	12521	Cd82	-1.25507	0.00325995
ENSMUSG00000039145	227541	Camk1d	-1.10394	2.51282e-75		ENSMUSG00000023043	16668	Krt18	-1.25456	2.69454e-39
ENSMUSG00000047878	239559	A4galt	-1.10295	8.60672e-21		ENSMUSG00000020601	217410	Trib2	-1.25442	1.29322e-10
ENSMUSG00000023826	50873	Park2	-1.10196	4.46424e-10		ENSMUSG00000073414	106722	G6b	-1.25412	0.000507145
ENSMUSG00000024098	65960	Twsg1	-1.10171	1.37412e-111		ENSMUSG00000034837	14685	Gnat1	-1.25408	0.0180871
ENSMUSG00000051379	71436	Flrt3	-1.10144	2.9136e-19		ENSMUSG00000057914	12296	Cacnb2	-1.25385	0.00470823
ENSMUSG00000009596	74469	Taf7l	-1.10122	5.47568e-15		ENSMUSG00000047658	545276	Gal3st3	-1.25357	7.1096e-10
ENSMUSG00000018752	619441	Tnfsfm13	-1.10083	4.9604e-08		ENSMUSG00000022783	50525	Spag6l	-1.25284	0.000180943
ENSMUSG00000056537	19820	Rlim	-1.1008	4.10559e-172		ENSMUSG00000056145	229694	AI504432	-1.25196	0.00241618
ENSMUSG00000041596	100417675	Nlrp5-ps	-1.09979	2.4638e-06		ENSMUSG00000029913	70779	Prdm5	-1.24996	1.8986e-60
ENSMUSG00000089953	329360	Rnf224	-1.09901	0.0146817		ENSMUSG00000098912	319830	1500004A13Rik	-1.24989	0.0161696
ENSMUSG00000009995	66826	Taz	-1.0988	3.39363e-36		ENSMUSG00000035275	242570	Raver2	-1.24954	9.18161e-61
ENSMUSG00000058147	22446	Xlr3c	-1.09741	2.13993e-06		ENSMUSG00000072568	399603	Fam84b	-1.24872	1.25641e-24
ENSMUSG00000069094	18583	Pde7a	-1.09725	2.32286e-98		ENSMUSG00000020131	18551	Pcsk4	-1.24851	7.23977e-15
ENSMUSG00000034664	16399	Itga2b	-1.09721	2.84308e-08		ENSMUSG00000020690	70894	Efcab3	-1.24788	0.0113611
ENSMUSG00000027824	56544	Vmn2r1	-1.09667	0.00299835		ENSMUSG00000078350	68859	Smim1	-1.24714	4.91884e-05
ENSMUSG00000097321	625175	1700028E10Rik	-1.09646	0.00142666		ENSMUSG00000039985	56306	Fam60a	-1.24709	1.73997e-295
ENSMUSG00000040446	225283	Rprd1a	-1.096	1.85804e-75		ENSMUSG00000061322	68922	Dnaic1	-1.24671	1.12694e-06
ENSMUSG00000021259	13116	Cyp46a1	-1.09574	0.000503909		ENSMUSG00000022952	12394	Runx1	-1.24516	2.13612e-13
ENSMUSG00000027276	16449	Jag1	-1.09548	4.85834e-30		ENSMUSG00000001300	13642	Efnb2	-1.24479	9.45346e-33
ENSMUSG00000071637	12609	Cebpd	-1.09426	1.40642e-08		ENSMUSG00000034917	27375	Tjp3	-1.24475	3.21144e-50
ENSMUSG00000023186	67776	Vwa5a	-1.09355	2.96596e-29		ENSMUSG00000022962	14450	Gart	-1.24439	0
ENSMUSG00000038298	59020	Pdzk1	-1.09242	0.0177898		ENSMUSG00000030406	381853	Gipr	-1.24402	5.33514e-14
ENSMUSG00000027220	80976	Syt13	-1.09196	2.6884e-09		ENSMUSG00000022759	74685	Lrrc74b	-1.24259	0.0145564
ENSMUSG00000003949	217082	Hlf	-1.0918	0.000162876		ENSMUSG00000033809	208624	Alg3	-1.24227	3.68435e-65
ENSMUSG00000077625	100216539	Snord4a	-1.09012	0.0135905		ENSMUSG00000059772	75764	Slx1b	-1.24081	1.10304e-50
ENSMUSG00000040828	106757	Catsperd	-1.08985	5.35846e-05		ENSMUSG00000035226	241770	Rims4	-1.24046	6.3011e-15
ENSMUSG00000002831	57435	Plin4	-1.08971	0.0155581		ENSMUSG00000039278	30052	Pcsk1n	-1.24004	2.00397e-52
ENSMUSG00000062353	100034726	Gm15772	-1.08948	1.78588e-08		ENSMUSG00000028358	72701	Zfp618	-1.23794	4.5608e-12
ENSMUSG00000008307	77036	1700109H08Rik	-1.08878	9.89327e-06		ENSMUSG00000053338	245126	Tarm1	-1.23722	1.80201e-07
ENSMUSG00000039629	320609	Strip2	-1.08839	5.18981e-05		ENSMUSG00000082286	236604	Pisd-ps1	-1.23455	5.22074e-16
ENSMUSG00000006179	54373	Prss16	-1.08825	2.73896e-09		ENSMUSG00000046532	11835	Ar	-1.23409	0.00125088
ENSMUSG00000029370	73246	Rassf6	-1.08789	4.42233e-06		ENSMUSG00000030731	20981	Syt3	-1.23343	6.87634e-16
ENSMUSG00000047875	269604	Gpr157	-1.08684	5.65832e-05		ENSMUSG00000071708	20603	Sms	-1.23265	2.98124e-161
ENSMUSG00000049620	353130	Prss33	-1.08661	0.0040292		ENSMUSG00000037279	107586	Ovol2	-1.23246	3.59683e-10
ENSMUSG00000043993	102640779	2900052L18Rik	-1.08646	6.02758e-12		ENSMUSG00000020668	16570	Kif3c	-1.23244	2.05284e-35
ENSMUSG00000052726	240776	Kcnt2	-1.08565	2.74329e-09		ENSMUSG00000020598	319504	Nrcam	-1.23196	0.000466393
ENSMUSG00000051335	328232	Gfod1	-1.08522	7.26839e-44		ENSMUSG00000081766	72381	2210409E12Rik	-1.23082	3.82369e-05
ENSMUSG00000027834	20713	Serpini1	-1.0839	3.34265e-14		ENSMUSG00000075277	102634678	Haglr	-1.22998	0.0137175
ENSMUSG00000078509	626943	Pramef17	-1.0838	0.013006		ENSMUSG00000027220	80976	Syt13	-1.2297	3.22645e-11
ENSMUSG00000091002	70571	Tcerg1l	-1.08319	8.9902e-08		ENSMUSG00000062353	100034726	Gm15772	-1.22954	3.2218e-10
ENSMUSG00000027175	320554	Tcp11l1	-1.08317	4.03846e-27		ENSMUSG00000015882	209707	Lcorl	-1.22913	1.85257e-64
ENSMUSG00000046223	18793	Plaur	-1.08312	2.37224e-52		ENSMUSG00000108660	100861870	Gm21284	-1.22908	0.00706771
ENSMUSG00000034488	13612	Edil3	-1.08286	0.0262354		ENSMUSG00000020766	14635	Galk1	-1.22725	8.57681e-133
ENSMUSG00000022229	192113	Atp12a	-1.0823	0.000155625		ENSMUSG00000044037	235633	Als2cl	-1.22708	1.44999e-76
ENSMUSG00000053930	380702	Shisa6	-1.08214	0.00468694		ENSMUSG00000027070	14725	Lrp2	-1.22555	5.82643e-38
ENSMUSG00000042258	16392	Isl1	-1.08165	0.000854365		ENSMUSG00000024014	18712	Pim1	-1.22375	8.51137e-225
ENSMUSG00000058656	320679	Samd12	-1.081	0.000135042		ENSMUSG00000042272	228071	Sestd1	-1.22322	1.98459e-78
ENSMUSG00000027070	14725	Lrp2	-1.0795	6.95466e-30		ENSMUSG00000025197	226143	Cyp2c44	-1.22277	0.000496994
ENSMUSG00000022629	16564	Kif21a	-1.07943	2.41453e-31		ENSMUSG00000059939	230996	9430015G10Rik	-1.22067	1.05884e-118
ENSMUSG00000006651	11803	Aplp1	-1.07855	1.2613e-113		ENSMUSG00000021411	66895	Pxdc1	-1.22052	0.000352818
ENSMUSG00000061356	100503545	Nuggc	-1.07852	1.37009e-05		ENSMUSG00000028807	73680	Zbtb8a	-1.22025	1.14539e-102
ENSMUSG00000004864	26415	Mapk13	-1.07807	1.16943e-29		ENSMUSG00000026748	67448	Plxdc2	-1.21973	2.28599e-30
ENSMUSG00000089804	105245924	Gm16136	-1.07532	0.0236928		ENSMUSG00000022262	110082	Dnah5	-1.21918	0.00146359
ENSMUSG00000019194	20266	Scn1b	-1.07512	1.83367e-18		ENSMUSG00000074673	74711	Ttll9	-1.21879	4.24241e-09
ENSMUSG00000021733	218756	Slc4a7	-1.07494	3.2596e-109		ENSMUSG00000025742	110639	Prps2	-1.21854	2.39058e-164
ENSMUSG00000021396	75124	Nxnl2	-1.07414	0.0141634		ENSMUSG00000048782	233752	Insc	-1.21663	1.14208e-07
ENSMUSG00000078817	378425	Nlrp12	-1.07411	0.00806014		ENSMUSG00000046027	170460	Stard5	-1.21662	1.07276e-45
ENSMUSG00000040811	72205	Eml2	-1.07406	1.83896e-80		ENSMUSG00000042116	246228	Vwa1	-1.21618	4.94397e-06
ENSMUSG00000022383	19013	Ppara	-1.07405	0.00291642		ENSMUSG00000027381	12125	Bcl2l11	-1.21497	1.27497e-73
ENSMUSG00000026639	16780	Lamb3	-1.07223	2.27741e-06		ENSMUSG00000017765	20498	Slc12a4	-1.21379	1.7652e-165
ENSMUSG00000027177	15259	Hipk3	-1.07136	8.3534e-46		ENSMUSG00000063524	13806	Eno1	-1.213	0
ENSMUSG00000038831	241308	Ralgps1	-1.07014	1.24411e-32		ENSMUSG00000015980	76612	Lrrc27	-1.21118	3.18855e-14
ENSMUSG00000002565	20259	Scin	-1.06921	0.00834801		ENSMUSG00000086587	100038514	Gm11837	-1.21109	3.18483e-11
ENSMUSG00000028979	17175	Masp2	-1.06916	1.71163e-07		ENSMUSG00000038963	108115	Slco4a1	-1.21077	1.12184e-33
ENSMUSG00000022580	14787	Rhpn1	-1.06869	2.66006e-13		ENSMUSG00000046314	217517	Stxbp6	-1.21066	5.1483e-06
ENSMUSG00000046168	328424	Kcnrg	-1.06823	0.00053335		ENSMUSG00000059456	19229	Ptk2b	-1.21064	5.02386e-54
ENSMUSG00000029832	18025	Nfe2l3	-1.06818	4.22323e-05		ENSMUSG00000001166	114643	Oas1c	-1.21037	6.01008e-05
ENSMUSG00000004328	53417	Hif3a	-1.06726	2.44558e-31		ENSMUSG00000031775	67801	Pllp	-1.20969	2.65053e-06
ENSMUSG00000005045	269610	Chd5	-1.06626	7.9722e-64		ENSMUSG00000026888	50915	Grb14	-1.20961	1.08067e-07
ENSMUSG00000059326	12982	Csf2ra	-1.06622	1.15212e-24		ENSMUSG00000087159	101055907	Gm15246	-1.20824	7.49513e-05
ENSMUSG00000037033	229927	Clca3b	-1.06611	1.98485e-20		ENSMUSG00000036030	235472	Prtg	-1.20823	5.80364e-39
ENSMUSG00000031239	16431	Itm2a	-1.06591	5.22867e-27		ENSMUSG00000038831	241308	Ralgps1	-1.20714	1.02996e-40
ENSMUSG00000034801	20663	Sos2	-1.06508	2.29913e-32		ENSMUSG00000022875	16644	Kng1	-1.20583	0.00812475
ENSMUSG00000011256	11492	Adam19	-1.06476	2.22907e-117		ENSMUSG00000023982	14913	Guca1a	-1.20506	4.60526e-06
ENSMUSG00000020654	104111	Adcy3	-1.06462	5.18859e-55		ENSMUSG00000042002	116810	Foxn4	-1.20359	6.76647e-17
ENSMUSG00000049382	16691	Krt8	-1.06439	1.67638e-68		ENSMUSG00000020674	69675	Pxdn	-1.2033	2.99581e-46
ENSMUSG00000031274	12830	Col4a5	-1.06371	1.51732e-08		ENSMUSG00000031425	18823	Plp1	-1.20321	2.67836e-12
ENSMUSG00000041417	18708	Pik3r1	-1.06354	1.95788e-34		ENSMUSG00000070371	77613	Prss36	-1.20245	7.2581e-23
ENSMUSG00000055923	231326	Aasdh	-1.06341	7.41013e-40		ENSMUSG00000056486	108699	Chn1	-1.2024	3.90375e-57
ENSMUSG00000031200	17763	Mtcp1	-1.06209	8.811e-11		ENSMUSG00000078439	72273	Smim24	-1.20218	0.00176691
ENSMUSG00000027035	241447	Cers6	-1.06167	1.75213e-64		ENSMUSG00000025855	19085	Prkar1b	-1.20206	8.68976e-05
ENSMUSG00000061520	110511	Olfr153	-1.0614	0.0274282		ENSMUSG00000040287	237611	Stac3	-1.20077	0.000597708
ENSMUSG00000040624	213783	Plekhg1	-1.06092	9.53525e-60		ENSMUSG00000052369	380967	Tmem106c	-1.20073	3.41638e-38
ENSMUSG00000029211	14397	Gabra4	-1.06066	0.00418254		ENSMUSG00000060981	69386	Hist1h4h	-1.20015	0.0223215
ENSMUSG00000045106	211936	Ccdc73	-1.05917	3.45388e-07		ENSMUSG00000041774	69101	Ydjc	-1.2	2.26235e-68
ENSMUSG00000045348	243300	Nyap1	-1.05908	2.01257e-32		ENSMUSG00000052726	240776	Kcnt2	-1.19946	6.99077e-11
ENSMUSG00000025500	72000	Lmntd2	-1.05823	3.76699e-13		ENSMUSG00000073795	381933	6430531B16Rik	-1.19917	0.000114733
ENSMUSG00000022055	18039	Nefl	-1.05728	1.68027e-42		ENSMUSG00000030685	233877	Kctd13	-1.19817	2.76238e-46
ENSMUSG00000035946	14843	Gsx2	-1.05551	0.0308294		ENSMUSG00000087026	320466	A230103J11Rik	-1.19746	0.0122853
ENSMUSG00000002020	16997	Ltbp2	-1.0547	5.10641e-05		ENSMUSG00000027401	21818	Tgm3	-1.19678	3.11783e-13
ENSMUSG00000022867	30940	Usp25	-1.05441	1.86165e-30		ENSMUSG00000015452	11596	Ager	-1.19573	0.0027753
ENSMUSG00000022139	105559	Mbnl2	-1.05377	7.02169e-85		ENSMUSG00000041132	100637	N4bp2l1	-1.19446	1.64291e-07
ENSMUSG00000021477	13039	Ctsl	-1.05336	2.63134e-243		ENSMUSG00000031373	56078	Car5b	-1.19291	5.73343e-05
ENSMUSG00000028789	242669	Azin2	-1.05289	7.61567e-30		ENSMUSG00000029575	77697	Mmab	-1.19287	1.9059e-45
ENSMUSG00000038677	268935	Scube3	-1.05269	5.93292e-46		ENSMUSG00000020023	319880	Tmcc3	-1.19259	2.78542e-16
ENSMUSG00000015133	233328	Lrrk1	-1.05258	1.04562e-06		ENSMUSG00000022229	192113	Atp12a	-1.19251	4.36737e-05
ENSMUSG00000056476	329650	Med12l	-1.05245	1.27112e-14		ENSMUSG00000033436	67416	Armcx2	-1.19229	4.27279e-105
ENSMUSG00000001988	18142	Npas1	-1.05178	0.0165261		ENSMUSG00000025630	15452	Hprt	-1.19171	6.17357e-175
ENSMUSG00000021876	58809	Rnase4	-1.05091	1.25761e-08		ENSMUSG00000037446	22157	Tulp1	-1.19148	3.04945e-06
ENSMUSG00000020300	67579	Cpeb4	-1.04906	7.76444e-29		ENSMUSG00000100594	102640772	2810414N06Rik	-1.19136	0.00229448
ENSMUSG00000063172	72938	Hspb11	-1.04791	8.44215e-09		ENSMUSG00000104667	242914	Gm4961	-1.1909	3.95676e-08
ENSMUSG00000045394	17075	Epcam	-1.04784	1.48113e-179		ENSMUSG00000040883	235043	Tmem205	-1.19088	9.27252e-26
ENSMUSG00000021662	110596	Arhgef28	-1.04595	1.33909e-19		ENSMUSG00000020695	17534	Mrc2	-1.19023	4.55737e-15
ENSMUSG00000046000	97243	Naa11	-1.04571	1.82938e-34		ENSMUSG00000002983	19698	Relb	-1.18989	2.1596e-42
ENSMUSG00000022237	67434	Ankrd33b	-1.0455	2.95415e-49		ENSMUSG00000070509	244058	Rgma	-1.18697	1.28878e-06
ENSMUSG00000036499	216238	Eea1	-1.0451	2.54951e-47		ENSMUSG00000047751	22286	Utf1	-1.18654	3.39393e-247
ENSMUSG00000063704	332110	Mapk15	-1.04502	5.29303e-08		ENSMUSG00000083649	19428	Rasl2-9	-1.18582	0.0132648
ENSMUSG00000021838	74480	Samd4	-1.04496	1.63202e-06		ENSMUSG00000025221	80906	Kcnip2	-1.18447	1.89899e-10
ENSMUSG00000023153	69671	Tmem52	-1.04404	0.0121509		ENSMUSG00000067786	18111	Nnat	-1.18429	3.07463e-09
ENSMUSG00000019889	19272	Ptprk	-1.04315	9.69181e-150		ENSMUSG00000034796	102278	Cpne7	-1.18423	3.17707e-06
ENSMUSG00000002249	21678	Tead3	-1.04272	6.16203e-12		ENSMUSG00000037636	194744	Slc25a43	-1.18322	1.06012e-06
ENSMUSG00000041144	227058	Dnah7b	-1.04245	0.0081523		ENSMUSG00000041617	72315	Ccdc74a	-1.18296	0.000231307
ENSMUSG00000021573	72948	Tppp	-1.04187	0.0161227		ENSMUSG00000073758	66938	Sh3d21	-1.18163	2.78475e-08
ENSMUSG00000078502	433801	Gm13212	-1.0416	2.97198e-22		ENSMUSG00000020098	13180	Pcbd1	-1.18162	1.90984e-08
ENSMUSG00000078496	195531	Zfp982	-1.04126	1.80731e-35		ENSMUSG00000019066	19340	Rab3d	-1.18136	1.92162e-33
ENSMUSG00000025885	17919	Myo5b	-1.04058	6.97773e-13		ENSMUSG00000018752	619441	Tnfsfm13	-1.18132	5.87341e-09
ENSMUSG00000051098	72852	Mblac2	-1.04025	2.52229e-05		ENSMUSG00000040536	69352	Necab1	-1.18113	1.54687e-12
ENSMUSG00000030894	12751	Tpp1	-1.04015	4.34676e-102		ENSMUSG00000050957	27356	Insl6	-1.18104	1.78983e-06
ENSMUSG00000073414	106722	G6b	-1.0401	0.00239225		ENSMUSG00000051730	75422	Mettl5	-1.181	1.42297e-85
ENSMUSG00000032308	71742	Ulk3	-1.03925	1.27689e-18		ENSMUSG00000048731	70772	Ggnbp1	-1.18006	1.00965e-33
ENSMUSG00000040339	329739	Fam102b	-1.03901	7.26052e-14		ENSMUSG00000007021	20974	Syngr3	-1.18004	3.6582e-18
ENSMUSG00000019775	56533	Rgs17	-1.03868	0.00704086		ENSMUSG00000054409	239408	Tmem74	-1.18001	0.00424664
ENSMUSG00000043017	19222	Ptgir	-1.03824	0.00482655		ENSMUSG00000047443	227358	Erfe	-1.17994	1.46822e-08
ENSMUSG00000027702	71827	Lrrc34	-1.03766	2.39339e-69		ENSMUSG00000028152	56224	Tspan5	-1.17857	4.96521e-54
ENSMUSG00000091614	71138	Gm17657	-1.03753	0.0022082		ENSMUSG00000070345	327992	Hsf5	-1.17848	2.17193e-05
ENSMUSG00000039648	70266	Kyat1	-1.03746	1.59947e-16		ENSMUSG00000064158	73456	Izumo1	-1.17844	5.47167e-06
ENSMUSG00000042985	100647	Upk3b	-1.03625	0.000358397		ENSMUSG00000005360	20512	Slc1a3	-1.17733	2.96107e-52
ENSMUSG00000039252	246316	Lgi2	-1.03625	1.0507e-07		ENSMUSG00000039873	415115	Neurl2	-1.17683	1.05155e-05
ENSMUSG00000029761	109624	Cald1	-1.03593	7.29706e-88		ENSMUSG00000031278	50790	Acsl4	-1.17675	5.64367e-88
ENSMUSG00000022199	59049	Slc22a17	-1.03521	5.63066e-19		ENSMUSG00000068250	232566	Amn1	-1.176	1.93372e-22
ENSMUSG00000036478	12226	Btg1	-1.03489	2.78718e-76		ENSMUSG00000024043	268970	Arhgap28	-1.17488	5.24862e-39
ENSMUSG00000069805	14121	Fbp1	-1.03425	0.0081767		ENSMUSG00000020793	14428	Galr2	-1.17418	0.00453474
ENSMUSG00000070527	22652	Mkrn3	-1.03404	3.74322e-20		ENSMUSG00000032449	192287	Slc25a36	-1.17338	1.42083e-49
ENSMUSG00000025221	80906	Kcnip2	-1.034	1.8138e-08		ENSMUSG00000021457	20963	Syk	-1.17233	4.55886e-117
ENSMUSG00000092300	69681	Cdk3-ps	-1.03209	0.000220193		ENSMUSG00000053153	66722	Spag16	-1.17221	5.46988e-06
ENSMUSG00000051401	383348	Kctd16	-1.03186	0.0155581		ENSMUSG00000040272	329470	Accs	-1.17199	1.40651e-10
ENSMUSG00000048022	319832	Tmem229a	-1.03153	0.000192617		ENSMUSG00000004558	29811	Ndrg2	-1.17191	7.01742e-55
ENSMUSG00000050822	243328	Slc29a4	-1.03136	1.46251e-41		ENSMUSG00000045251	69234	Zfp688	-1.17075	1.70561e-36
ENSMUSG00000048752	235631	Prss50	-1.03127	4.32396e-11		ENSMUSG00000028689	68394	Ccdc163	-1.17055	3.0017e-27
ENSMUSG00000029419	381353	Gm996	-1.02956	3.73898e-05		ENSMUSG00000027339	215653	Rassf2	-1.16903	2.28167e-24
ENSMUSG00000032174	15898	Icam5	-1.02952	0.000116408		ENSMUSG00000028463	230099	Car9	-1.16751	0.000398199
ENSMUSG00000073374	77533	C030034I22Rik	-1.02948	0.000107648		ENSMUSG00000047996	546336	Prrg1	-1.16721	1.83042e-06
ENSMUSG00000022686	108105	B3gnt5	-1.02894	3.00951e-55		ENSMUSG00000044966	319701	Fbxo48	-1.1659	5.69567e-09
ENSMUSG00000044664	235628	Prss42	-1.02865	1.1765e-10		ENSMUSG00000067235	15007	H2-Q10	-1.16584	0.000121659
ENSMUSG00000037243	103836	Zfp692	-1.02852	1.07565e-37		ENSMUSG00000018654	22778	Ikzf1	-1.16564	0.000866852
ENSMUSG00000020275	19696	Rel	-1.02742	2.85258e-11		ENSMUSG00000026587	11899	Astn1	-1.16559	0.0156505
ENSMUSG00000079056	56461	Kcnip3	-1.02711	1.14669e-14		ENSMUSG00000033149	208177	Phldb2	-1.16505	2.57875e-29
ENSMUSG00000002985	11816	Apoe	-1.02523	5.31203e-152		ENSMUSG00000046157	268567	Tmem229b	-1.16484	3.27331e-11
ENSMUSG00000033510	170711	Otud7a	-1.02481	0.000101174		ENSMUSG00000031951	234740	Tmem231	-1.16432	2.80466e-82
ENSMUSG00000085037	100504166	4933421O10Rik	-1.02395	0.00114483		ENSMUSG00000031284	18481	Pak3	-1.16427	6.11619e-09
ENSMUSG00000010064	76257	Slc38a3	-1.02325	5.1125e-11		ENSMUSG00000049649	14748	Gpr3	-1.16365	0.000968791
ENSMUSG00000095990	22759	Zfp97	-1.02325	1.18045e-42		ENSMUSG00000028483	77634	Snapc3	-1.16351	1.28142e-86
ENSMUSG00000074736	433485	Syndig1	-1.02316	3.70864e-07		ENSMUSG00000024873	12794	Cnih2	-1.1596	2.04031e-07
ENSMUSG00000039200	75329	Atf7ip2	-1.02301	4.30368e-32		ENSMUSG00000024462	54393	Gabbr1	-1.15908	1.02953e-36
ENSMUSG00000028179	107869	Cth	-1.02294	1.37794e-165		ENSMUSG00000035580	211468	Kcnh8	-1.15842	0.0297728
ENSMUSG00000038859	66898	Baiap2l1	-1.02273	1.61453e-11		ENSMUSG00000030742	16797	Lat	-1.15722	5.25131e-09
ENSMUSG00000091586	208285	Cyp4f17	-1.02172	8.72501e-13		ENSMUSG00000103711	226654	Tstd1	-1.15691	1.55721e-06
ENSMUSG00000031303	270672	Map3k15	-1.02024	1.62357e-29		ENSMUSG00000027488	20648	Snta1	-1.15659	2.63858e-59
ENSMUSG00000000706	12231	Btn1a1	-1.01997	0.0255318		ENSMUSG00000028687	70603	Mutyh	-1.15644	9.80535e-46
ENSMUSG00000043029	246788	Trpv3	-1.01875	0.0101824		ENSMUSG00000047767	73683	Atg16l2	-1.15583	2.56535e-19
ENSMUSG00000037428	381677	Vgf	-1.01794	1.36535e-09		ENSMUSG00000070332	432613	Trim80	-1.15531	0.0128712
ENSMUSG00000028518	108079	Prkaa2	-1.01705	2.02189e-46		ENSMUSG00000034450	268756	Gulo	-1.15507	1.61481e-09
ENSMUSG00000030559	72433	Rab38	-1.01688	0.000241342		ENSMUSG00000002227	17454	Mov10	-1.15486	7.43134e-198
ENSMUSG00000056069	223433	Fam105a	-1.01595	0.000534357		ENSMUSG00000096803	627873	Gm6803	-1.15482	0.0108175
ENSMUSG00000038292	384619	Ccdc155	-1.01569	7.81019e-11		ENSMUSG00000028295	66291	Smim8	-1.15373	2.5788e-23
ENSMUSG00000073016	331487	Uprt	-1.01563	1.74711e-08		ENSMUSG00000045312	218454	Lhfpl2	-1.15167	5.78128e-15
ENSMUSG00000021704	382793	Mtx3	-1.01501	1.2701e-32		ENSMUSG00000035041	208677	Creb3l3	-1.14981	0.000198159
ENSMUSG00000025348	16404	Itga7	-1.01457	2.28792e-07		ENSMUSG00000071637	12609	Cebpd	-1.14833	2.8548e-09
ENSMUSG00000040520	242362	Manea	-1.0144	1.63801e-37		ENSMUSG00000038637	70552	Lrrc56	-1.14822	3.02416e-14
ENSMUSG00000028019	54635	Pdgfc	-1.01414	6.93852e-62		ENSMUSG00000071226	330409	Cecr2	-1.14769	3.74541e-165
ENSMUSG00000014791	234683	Elmo3	-1.01403	1.43226e-13		ENSMUSG00000024295	77875	Cyp4f41-ps	-1.14726	0.00740796
ENSMUSG00000028399	19266	Ptprd	-1.01396	8.40216e-05		ENSMUSG00000049929	78134	Lpar4	-1.14485	7.7711e-11
ENSMUSG00000000673	107766	Haao	-1.01367	0.0167596		ENSMUSG00000067872	399599	Ccdc87	-1.14314	0.00378216
ENSMUSG00000040653	76142	Ppp1r14c	-1.01314	0.000721398		ENSMUSG00000032174	15898	Icam5	-1.14154	2.7261e-05
ENSMUSG00000033721	57257	Vav3	-1.01273	0.000112376		ENSMUSG00000039646	246154	Vasn	-1.14099	3.09546e-07
ENSMUSG00000026579	14067	F5	-1.0125	2.16884e-06		ENSMUSG00000025359	20431	Pmel	-1.14066	1.4881e-20
ENSMUSG00000024030	11307	Abcg1	-1.01237	7.49767e-21		ENSMUSG00000028653	66966	Trit1	-1.14065	5.05306e-61
ENSMUSG00000029661	12843	Col1a2	-1.01172	0.00100385		ENSMUSG00000067642	381628	Adgrf3	-1.14037	0.00558428
ENSMUSG00000020793	14428	Galr2	-1.01159	0.00915109		ENSMUSG00000015222	17756	Map2	-1.14006	5.59044e-24
ENSMUSG00000037138	16764	Aff3	-1.01148	1.6271e-11		ENSMUSG00000006469	142681	Slc34a3	-1.13944	7.67823e-08
ENSMUSG00000108030	78739	9530062K07Rik	-1.01145	0.00954717		ENSMUSG00000020181	260315	Nav3	-1.13897	0.0175606
ENSMUSG00000010592	13164	Dazl	-1.01065	5.9784e-33		ENSMUSG00000027584	18389	Oprl1	-1.13774	0.00289354
ENSMUSG00000040434	228366	Large2	-1.01062	2.43523e-30		ENSMUSG00000046856	241070	Gpr1	-1.13703	0.016016
ENSMUSG00000029778	11517	Adcyap1r1	-1.00967	5.06227e-05		ENSMUSG00000057003	17884	Myh4	-1.13663	0.024411
ENSMUSG00000006587	30927	Snai3	-1.00965	7.79595e-11		ENSMUSG00000026271	64095	Gpr35	-1.13655	0.0152742
ENSMUSG00000037685	11980	Atp8a1	-1.00898	7.70299e-33		ENSMUSG00000029776	58875	Hibadh	-1.13564	8.9511e-142
ENSMUSG00000048915	13640	Efna5	-1.00835	4.09649e-05		ENSMUSG00000014599	12977	Csf1	-1.13408	9.83715e-06
ENSMUSG00000038560	83395	Sp6	-1.00724	7.25382e-22		ENSMUSG00000045193	12696	Cirbp	-1.13342	2.17093e-79
ENSMUSG00000020732	58222	Rab37	-1.00652	0.000487683		ENSMUSG00000029636	245880	Wasf3	-1.13319	1.76915e-105
ENSMUSG00000024867	18719	Pip5k1b	-1.00611	1.55379e-09		ENSMUSG00000039252	246316	Lgi2	-1.13305	7.82728e-09
ENSMUSG00000048142	269642	Nat8l	-1.00583	1.50845e-15		ENSMUSG00000040428	69217	Plekha4	-1.13288	5.48403e-15
ENSMUSG00000056124	56386	B4galt6	-1.00455	2.72894e-118		ENSMUSG00000034936	80981	Arl4d	-1.13225	2.2298e-25
ENSMUSG00000019790	78808	Stxbp5	-1.00426	3.01296e-19		ENSMUSG00000029032	230972	Arhgef16	-1.13205	5.20277e-32
ENSMUSG00000046352	14619	Gjb2	-1.00363	0.00241762		ENSMUSG00000031736	71296	Crnde	-1.13152	1.8977e-08
ENSMUSG00000052949	217340	Rnf157	-1.0035	2.17653e-54		ENSMUSG00000101856	73571	1700096K18Rik	-1.13063	3.19491e-05
ENSMUSG00000013846	20442	St3gal1	-1.00346	0.000694176		ENSMUSG00000009585	80287	Apobec3	-1.13053	2.57118e-169
ENSMUSG00000035992	216742	Fnip1	-1.00337	3.00114e-88		ENSMUSG00000028167	69772	Bdh2	-1.12953	6.44003e-34
ENSMUSG00000028385	209131	Snx30	-1.00326	4.05709e-74		ENSMUSG00000028397	76804	Kdm4c	-1.12907	4.3923e-181
ENSMUSG00000087574	193280	C030037D09Rik	-1.00279	9.49903e-10		ENSMUSG00000044550	594844	Tceal3	-1.12882	0.00969285
ENSMUSG00000020774	11484	Aspa	-1.00238	0.00318128		ENSMUSG00000049225	381511	Pdp1	-1.12832	2.92279e-22
ENSMUSG00000007812	72611	Zfp655	-1.00234	7.78504e-123		ENSMUSG00000034723	52837	Tmx4	-1.12687	4.05206e-23
ENSMUSG00000040703	74134	Cyp2s1	-1.00181	6.92935e-20		ENSMUSG00000028179	107869	Cth	-1.12623	3.32872e-200
ENSMUSG00000026970	56878	Rbms1	-1.00172	1.37582e-88		ENSMUSG00000060508	243874	Nlrp9b	-1.12619	7.17417e-11
ENSMUSG00000036989	55992	Trim3	-1.00154	4.02617e-38		ENSMUSG00000019986	52906	Ahi1	-1.12611	1.02976e-78
ENSMUSG00000041301	12638	Cftr	-1.00102	0.0309139		ENSMUSG00000037613	79201	Tnfrsf23	-1.12546	0.00414546
ENSMUSG00000022789	74006	Dnm1l	-1.00098	6.35435e-211		ENSMUSG00000015467	81701	Egfl8	-1.12519	0.00869136
ENSMUSG00000040613	11810	Apobec1	-1.00069	1.67892e-27		ENSMUSG00000059040	433182	Eno1b	-1.12395	5.99586e-205
ENSMUSG00000062866	215789	Phactr2	-1.0006	8.21149e-09		ENSMUSG00000086158	546143	Ccpg1os	-1.12366	5.71308e-09
ENSMUSG00000001334	384061	Fndc5	-1.00049	1.18003e-06		ENSMUSG00000077903	100049712	Mir294	-1.12183	8.24757e-09
ENSMUSG00000092887	100217456	Snord53	-1.00017	0.00318598		ENSMUSG00000091712	665119	Sec14l5	-1.11982	3.57972e-05
ENSMUSG00000106519	102638436	Gm38509	1.00098	0.00147463		ENSMUSG00000068874	20341	Selenbp1	-1.11825	4.45796e-07
ENSMUSG00000009248	17173	Ascl2	1.00142	8.14754e-12		ENSMUSG00000023022	65970	Lima1	-1.11802	1.60107e-156
ENSMUSG00000057143	319236	Trim12c	1.00193	2.51088e-10		ENSMUSG00000002688	18760	Prkd1	-1.1177	9.20839e-08
ENSMUSG00000026307	50880	Scly	1.00289	7.959e-59		ENSMUSG00000021368	67046	Tbc1d7	-1.11709	2.22636e-35
ENSMUSG00000029762	14187	Akr1b8	1.00313	2.92415e-32		ENSMUSG00000024854	69745	Pold4	-1.11634	3.32272e-10
ENSMUSG00000086552	320453	Dlx4os	1.00349	0.0337932		ENSMUSG00000086454	74959	Platr14	-1.11558	2.81238e-59
ENSMUSG00000051879	56735	Krt71	1.004	0.0211827		ENSMUSG00000020359	72947	Phykpl	-1.11549	4.10276e-18
ENSMUSG00000020623	26399	Map2k6	1.00407	2.4686e-26		ENSMUSG00000028093	66659	Acp6	-1.11491	4.68774e-168
ENSMUSG00000086847	433944	Tbx3os2	1.0041	0.000827361		ENSMUSG00000032087	114873	Dscaml1	-1.1147	1.35768e-10
ENSMUSG00000026281	21915	Dtymk	1.00446	5.8488e-180		ENSMUSG00000029279	114642	Brdt	-1.1143	0.000181775
ENSMUSG00000063903	16612	Klk1	1.0053	0.000233637		ENSMUSG00000037606	79196	Osbpl5	-1.11308	2.50571e-11
ENSMUSG00000026309	67444	Ilkap	1.00551	4.5063e-98		ENSMUSG00000028034	51886	Fubp1	-1.11243	0
ENSMUSG00000039661	66959	Dusp26	1.0058	0.000396354		ENSMUSG00000024339	21355	Tap2	-1.11172	2.16072e-05
ENSMUSG00000026248	69163	Mrpl44	1.00611	1.41819e-85		ENSMUSG00000093847	266459	Gm5039	-1.10959	3.86122e-05
ENSMUSG00000005483	81489	Dnajb1	1.00628	1.45726e-88		ENSMUSG00000033685	22228	Ucp2	-1.10773	5.3634e-184
ENSMUSG00000041079	53858	Rwdd2b	1.00651	4.74621e-19		ENSMUSG00000066829	235050	Zfp810	-1.10636	5.33273e-17
ENSMUSG00000028164	110173	Manba	1.00729	1.35215e-78		ENSMUSG00000047040	217138	Prr15l	-1.10574	1.64937e-05
ENSMUSG00000060600	13808	Eno3	1.00803	5.99717e-45		ENSMUSG00000023912	74011	Slc25a27	-1.10557	4.84709e-11
ENSMUSG00000034127	216350	Tspan8	1.00906	8.87917e-05		ENSMUSG00000040680	73016	Kremen2	-1.10366	5.40655e-06
ENSMUSG00000025318	57340	Jph3	1.00967	2.77862e-08		ENSMUSG00000037321	21354	Tap1	-1.10337	1.84237e-21
ENSMUSG00000041605	67313	5730559C18Rik	1.00997	6.67793e-36		ENSMUSG00000072692	100502825	Rpl37rt	-1.10335	1.30904e-10
ENSMUSG00000085327	102634174	Gm16104	1.01011	3.04877e-05		ENSMUSG00000056666	67442	Retsat	-1.10201	1.07409e-30
ENSMUSG00000073125	574437	Xlr3b	1.01018	0.000621904		ENSMUSG00000053219	379043	Raet1e	-1.10196	2.09564e-17
ENSMUSG00000002345	72368	Borcs8	1.0102	3.95528e-32		ENSMUSG00000086015	73906	4833417C18Rik	-1.10194	1.45494e-05
ENSMUSG00000001305	67223	Rrp15	1.01043	1.07568e-121		ENSMUSG00000097195	72655	Snhg5	-1.10181	1.82275e-104
ENSMUSG00000040721	239102	Zfhx2	1.01066	4.73108e-91		ENSMUSG00000021061	20741	Sptb	-1.10103	1.11444e-48
ENSMUSG00000031823	102193	Zdhhc7	1.01082	2.8216e-44		ENSMUSG00000024544	52662	Ldlrad4	-1.10092	5.59672e-13
ENSMUSG00000026709	226539	Dars2	1.01207	6.84081e-112		ENSMUSG00000059816	545667	Fam159a	-1.10063	9.43223e-05
ENSMUSG00000041438	21771	Utp4	1.01251	5.93688e-175		ENSMUSG00000048706	52829	Lurap1l	-1.10038	6.05283e-09
ENSMUSG00000106951	319982	5930430L01Rik	1.01542	0.0190635		ENSMUSG00000030922	73919	Lyrm1	-1.09979	2.31439e-06
ENSMUSG00000086617	666331	Gm11635	1.01577	0.000920672		ENSMUSG00000037710	52637	Cisd1	-1.09969	3.8381e-84
ENSMUSG00000006005	108989	Tpr	1.01644	2.19086e-251		ENSMUSG00000027001	68082	Dusp19	-1.09904	1.79881e-13
ENSMUSG00000016427	54405	Ndufa1	1.01766	1.93134e-73		ENSMUSG00000040147	109731	Maob	-1.09747	0.00286447
ENSMUSG00000026407	12292	Cacna1s	1.02188	0.00120116		ENSMUSG00000054662	71345	Ano9	-1.09722	5.6199e-55
ENSMUSG00000032549	270192	Rab6b	1.02392	1.06601e-34		ENSMUSG00000057058	78473	Skap1	-1.09722	0.0232093
ENSMUSG00000030747	67800	Dgat2	1.02582	1.45605e-15		ENSMUSG00000003872	22342	Lin7b	-1.09666	8.0671e-05
ENSMUSG00000028836	230810	Slc30a2	1.02684	2.18498e-40		ENSMUSG00000017764	71971	Zswim1	-1.09655	4.66266e-98
ENSMUSG00000041729	235431	Coro2b	1.02707	2.66459e-49		ENSMUSG00000035293	217558	G2e3	-1.09582	1.37251e-86
ENSMUSG00000062591	22153	Tubb4a	1.02709	9.52676e-06		ENSMUSG00000029999	21802	Tgfa	-1.0957	9.36298e-11
ENSMUSG00000034292	74019	Traf3ip1	1.02752	1.77881e-66		ENSMUSG00000041775	69546	Mapk1ip1	-1.09483	4.17675e-34
ENSMUSG00000105402	100042198	Gm3716	1.02801	0.000399907		ENSMUSG00000020486	18952	2025-09-04	-1.0948	0.000647083
ENSMUSG00000027224	213696	Duoxa1	1.02941	0.0149808		ENSMUSG00000075590	223649	Nrbp2	-1.09291	3.65198e-19
ENSMUSG00000043251	277978	Exoc3l	1.03015	5.87053e-48		ENSMUSG00000098090	77022	2700099C18Rik	-1.09174	2.41746e-37
ENSMUSG00000095941	102638837	Gm21964	1.03202	0.00619178		ENSMUSG00000073889	16157	Il11ra1	-1.09168	3.74068e-11
ENSMUSG00000063605	234582	Ccdc102a	1.03227	1.18078e-30		ENSMUSG00000056458	26448	Mok	-1.09075	1.202e-34
ENSMUSG00000027474	228788	Ccm2l	1.03401	2.93325e-05		ENSMUSG00000073988	50500	Ttpa	-1.09066	1.02404e-27
ENSMUSG00000036168	237465	Ccdc38	1.03426	7.29331e-05		ENSMUSG00000019767	100504234	Ccdc170	-1.09002	0.00168824
ENSMUSG00000055407	17760	Map6	1.03439	4.6213e-22		ENSMUSG00000024266	75773	Adad2	-1.08769	7.12051e-17
ENSMUSG00000039741	268515	Bahcc1	1.03578	9.16138e-129		ENSMUSG00000019312	14786	Grb7	-1.0868	4.07012e-79
ENSMUSG00000078931	68023	Pdf	1.03591	0.0171358		ENSMUSG00000002413	109880	Braf	-1.08546	4.65603e-92
ENSMUSG00000055937	70843	Krt28	1.03614	0.0196826		ENSMUSG00000029162	16548	Khk	-1.08545	9.24965e-16
ENSMUSG00000069911	574403	Fam196b	1.03892	0.000194922		ENSMUSG00000070473	12739	Cldn3	-1.08492	3.99179e-11
ENSMUSG00000035285	269854	Nat14	1.03982	0.00275237		ENSMUSG00000021902	71838	Phf7	-1.08471	7.89464e-22
ENSMUSG00000015568	16956	Lpl	1.03994	1.70417e-27		ENSMUSG00000023942	63959	Slc29a1	-1.08383	2.91755e-228
ENSMUSG00000031837	117148	Necab2	1.04064	3.95943e-31		ENSMUSG00000036986	18854	Pml	-1.08278	4.86006e-242
ENSMUSG00000056737	12332	Capg	1.04131	1.65696e-50		ENSMUSG00000063632	20666	Sox11	-1.08167	2.48914e-38
ENSMUSG00000026192	108147	Atic	1.04192	3.24169e-287		ENSMUSG00000091345	665033	Col6a5	-1.08144	1.70321e-07
ENSMUSG00000020396	380684	Nefh	1.04383	1.70368e-105		ENSMUSG00000021062	104886	Rab15	-1.08107	5.30915e-59
ENSMUSG00000038046	67390	Mrm3	1.04434	6.94251e-23		ENSMUSG00000030774	18479	Pak1	-1.07915	3.26503e-55
ENSMUSG00000027863	12481	Cd2	1.04579	0.00796871		ENSMUSG00000028626	12840	Col9a2	-1.07905	1.64434e-28
ENSMUSG00000025578	30951	Cbx8	1.04853	0.000314732		ENSMUSG00000031530	319520	Dusp4	-1.07901	1.54393e-63
ENSMUSG00000046031	215900	Fam26f	1.04888	0.00308408		ENSMUSG00000048040	76976	Arxes2	-1.07868	1.70104e-31
ENSMUSG00000047654	83984	Tssk6	1.04908	0.0187332		ENSMUSG00000056069	223433	Fam105a	-1.07822	0.000303394
ENSMUSG00000014846	67971	Tppp3	1.04953	2.98114e-11		ENSMUSG00000036196	224661	Slc26a8	-1.07771	0.0182323
ENSMUSG00000032593	320844	Amigo3	1.05012	0.00782609		ENSMUSG00000049866	320982	Arl4c	-1.0772	2.31011e-34
ENSMUSG00000026036	65102	Nif3l1	1.0507	1.21158e-102		ENSMUSG00000025161	80879	Slc16a3	-1.07619	1.21379e-54
ENSMUSG00000055430	58243	Nap1l5	1.05119	5.16443e-05		ENSMUSG00000049680	72046	Urgcp	-1.07541	8.60103e-16
ENSMUSG00000015843	20183	Rxrg	1.0516	7.52332e-05		ENSMUSG00000087138	100502630	Gm15545	-1.07496	2.77593e-16
ENSMUSG00000034730	107831	Adgrb1	1.05321	8.62201e-52		ENSMUSG00000078773	623474	Rad54b	-1.07445	1.28043e-76
ENSMUSG00000025085	226251	Ablim1	1.05351	2.35923e-33		ENSMUSG00000042554	22789	Zp3r	-1.07265	0.0298046
ENSMUSG00000075289	107239	Carns1	1.05358	4.6491e-05		ENSMUSG00000064451	100379145	Snora23	-1.07231	0.0186528
ENSMUSG00000037993	64340	Dhx38	1.05645	1.99555e-187		ENSMUSG00000100826	52480	Snhg14	-1.07163	5.10031e-64
ENSMUSG00000034595	76448	Ppp1r18	1.05908	1.92558e-79		ENSMUSG00000028634	16656	Hivep3	-1.07111	5.40264e-05
ENSMUSG00000098923	226351	Tmem185b	1.05934	2.62546e-23		ENSMUSG00000041912	72634	Tdrkh	-1.07068	1.20174e-14
ENSMUSG00000047710	101994	Champ1	1.05987	1.71334e-139		ENSMUSG00000091405	97122	Hist2h4	-1.07027	0.0233901
ENSMUSG00000002500	66211	Rpl3l	1.06041	0.000114794		ENSMUSG00000003282	56711	Plag1	-1.06951	3.85047e-22
ENSMUSG00000086468	102633673	Etaa1os	1.06047	2.95053e-05		ENSMUSG00000038415	15220	Foxq1	-1.06922	1.10885e-10
ENSMUSG00000066319	235636	Rtp3	1.06267	0.000220272		ENSMUSG00000030116	50530	Mfap5	-1.06885	1.4569e-05
ENSMUSG00000010529	212539	Gm266	1.06302	0.00910632		ENSMUSG00000097769	100503380	Snhg4	-1.06867	9.21565e-45
ENSMUSG00000040907	232975	Atp1a3	1.06504	8.81138e-116		ENSMUSG00000038543	229600	BC028528	-1.06866	7.06287e-06
ENSMUSG00000021125	11847	Arg2	1.06553	0.002218		ENSMUSG00000014158	63873	Trpv4	-1.06784	5.38693e-08
ENSMUSG00000051223	66882	Bzw1	1.06602	9.16459e-167		ENSMUSG00000037211	24063	Spry1	-1.06759	2.98693e-58
ENSMUSG00000045538	71986	Ddx28	1.06624	6.27352e-51		ENSMUSG00000085139	319764	A730046J19Rik	-1.0674	0.0140335
ENSMUSG00000044303	12578	Cdkn2a	1.06668	3.03774e-29		ENSMUSG00000058454	13360	Dhcr7	-1.06687	8.20818e-61
ENSMUSG00000047935	434280	Gm5607	1.06793	0.0129305		ENSMUSG00000090150	102632	Acad11	-1.0668	3.78134e-92
ENSMUSG00000026547	21346	Tagln2	1.06793	1.49203e-182		ENSMUSG00000097767	330166	Miat	-1.06679	6.05637e-06
ENSMUSG00000041358	213765	Nutm1	1.06818	0.0273658		ENSMUSG00000041688	27494	Amot	-1.06628	9.70978e-33
ENSMUSG00000078776	319482	9530053A07Rik	1.06854	3.69043e-11		ENSMUSG00000005357	20513	Slc1a6	-1.06608	0.000738266
ENSMUSG00000031145	54630	Prickle3	1.06872	1.1906e-14		ENSMUSG00000078485	231002	Plekhn1	-1.06316	1.6819e-07
ENSMUSG00000026278	51800	Bok	1.06914	1.27118e-30		ENSMUSG00000067203	630499	H2-K2	-1.063	4.88356e-05
ENSMUSG00000031750	76527	Il34	1.07092	0.000396895		ENSMUSG00000002341	13004	Ncan	-1.062	3.72201e-20
ENSMUSG00000002100	17868	Mybpc3	1.07331	0.000385793		ENSMUSG00000054404	327978	Slfn5	-1.06148	0.00833698
ENSMUSG00000032125	74144	Robo4	1.07354	1.81263e-18		ENSMUSG00000032735	319713	Ablim3	-1.06031	0.000193289
ENSMUSG00000019362	101966	D8Ertd738e	1.07431	3.01714e-94		ENSMUSG00000029026	22062	Trp73	-1.06022	3.5211e-17
ENSMUSG00000018470	16499	Kcnab3	1.07647	8.92438e-12		ENSMUSG00000033361	208748	Prrg3	-1.06016	9.66664e-20
ENSMUSG00000031543	11733	Ank1	1.07767	0.000401436		ENSMUSG00000024357	81500	Sil1	-1.06011	9.04256e-22
ENSMUSG00000041396	69962	Mettl18	1.07792	6.26739e-31		ENSMUSG00000018169	17305	Mfng	-1.06	4.16155e-15
ENSMUSG00000078640	100040792	Gm11627	1.07885	2.65486e-10		ENSMUSG00000053129	14842	Gsx1	-1.05944	0.0157585
ENSMUSG00000029644	18609	Pdx1	1.07969	0.0129444		ENSMUSG00000065431	387181	Mir186	-1.0594	0.00164035
ENSMUSG00000049939	192198	Lrrc4	1.08097	0.00285564		ENSMUSG00000050965	18750	Prkca	-1.05885	1.49008e-12
ENSMUSG00000001493	17285	Meox1	1.08142	0.00168044		ENSMUSG00000028909	19273	Ptpru	-1.0586	2.72992e-20
ENSMUSG00000091337	58521	Eid1	1.08212	1.21916e-47		ENSMUSG00000068923	229521	Syt11	-1.05842	8.53188e-26
ENSMUSG00000014776	78688	Nol3	1.08246	5.32736e-05		ENSMUSG00000098374	106014251	Gm28043	-1.05706	1.33423e-05
ENSMUSG00000024742	14156	Fen1	1.0827	2.39615e-141		ENSMUSG00000033676	14402	Gabrb3	-1.05684	4.5803e-22
ENSMUSG00000028064	20351	Sema4a	1.08322	4.73193e-35		ENSMUSG00000068617	66793	Efcab1	-1.05632	0.0143008
ENSMUSG00000050394	278097	Armcx6	1.08346	5.98408e-11		ENSMUSG00000050373	101113	Snx21	-1.05577	1.72201e-08
ENSMUSG00000005410	17218	Mcm5	1.08415	0		ENSMUSG00000036745	70892	Ttll7	-1.05552	0.000861515
ENSMUSG00000034271	81703	Jdp2	1.08462	3.0144e-34		ENSMUSG00000026649	75472	Cfap126	-1.05326	0.00101582
ENSMUSG00000046330	19981	Rpl37a	1.08486	5.48393e-196		ENSMUSG00000036098	225908	Myrf	-1.05267	7.69963e-129
ENSMUSG00000036572	68134	Upf3b	1.08523	6.15292e-128		ENSMUSG00000087574	193280	C030037D09Rik	-1.05266	1.38815e-10
ENSMUSG00000037771	22348	Slc32a1	1.08546	0.000149486		ENSMUSG00000036931	243910	Nfkbid	-1.05198	4.80176e-14
ENSMUSG00000026526	14194	Fh1	1.0904	5.5676e-152		ENSMUSG00000035722	27403	Abca7	-1.05161	4.81176e-41
ENSMUSG00000057060	210027	Slc35f3	1.09168	0.0041522		ENSMUSG00000053040	68318	Aph1c	-1.05147	0.000429222
ENSMUSG00000102222	93722	Pcdhga10	1.09212	2.09258e-08		ENSMUSG00000035757	223776	Selenoo	-1.04784	1.5025e-17
ENSMUSG00000059208	76936	Hnrnpm	1.09253	0		ENSMUSG00000025265	14163	Fgd1	-1.04647	2.2053e-182
ENSMUSG00000050623	67077	Catsperz	1.09321	5.64294e-09		ENSMUSG00000049971	319804	Glt1d1	-1.04646	6.06888e-67
ENSMUSG00000037894	51788	H2afz	1.09379	7.55156e-196		ENSMUSG00000037025	15376	Foxa2	-1.04545	0.00449285
ENSMUSG00000068699	68794	Flnc	1.09655	2.51475e-29		ENSMUSG00000024869	66387	Nudt8	-1.04508	1.52224e-26
ENSMUSG00000003033	11767	Ap1m1	1.09774	1.05569e-112		ENSMUSG00000068099	76505	1500009C09Rik	-1.04409	0.0209873
ENSMUSG00000064329	20265	Scn1a	1.10121	0.0229543		ENSMUSG00000096696	449000	Zfp960	-1.04298	2.3532e-35
ENSMUSG00000061024	59014	Rrs1	1.10239	1.72176e-158		ENSMUSG00000043336	78749	Filip1l	-1.04257	0.00380867
ENSMUSG00000083307	245350	AA414768	1.10308	4.46674e-14		ENSMUSG00000024034	140765	Tmprss3	-1.04251	0.0228759
ENSMUSG00000047155	81906	Cyp4x1	1.10332	0.00999691		ENSMUSG00000071719	620592	Tmem28	-1.0422	8.10088e-26
ENSMUSG00000037010	30878	Apln	1.10336	0.0264639		ENSMUSG00000058741	623131	Prr19	-1.04155	9.13412e-08
ENSMUSG00000097398	78650	Platr5	1.10364	2.0341e-05		ENSMUSG00000045709	76419	Smkr-ps	-1.04088	0.0346155
ENSMUSG00000003135	52846	Cnot11	1.10677	6.44763e-115		ENSMUSG00000036052	56323	Dnajb5	-1.04059	2.51205e-41
ENSMUSG00000024395	225341	Lims2	1.10769	1.52806e-06		ENSMUSG00000027243	241547	Harbi1	-1.04026	1.52584e-40
ENSMUSG00000044148	69155	1810030O07Rik	1.10944	3.50873e-109		ENSMUSG00000021944	14463	Gata4	-1.03747	3.73807e-27
ENSMUSG00000026979	215632	Psd4	1.11065	6.80342e-23		ENSMUSG00000024352	71242	Spata24	-1.03693	1.69425e-11
ENSMUSG00000038668	14745	Lpar1	1.11112	1.14606e-20		ENSMUSG00000041889	77552	Shisa4	-1.03642	6.64197e-10
ENSMUSG00000097694	619312	G730013B05Rik	1.11132	1.83496e-05		ENSMUSG00000027983	71519	Cyp2u1	-1.03617	6.54621e-05
ENSMUSG00000038398	67031	Upf3a	1.11266	1.16135e-98		ENSMUSG00000025006	20411	Sorbs1	-1.03607	1.99454e-19
ENSMUSG00000037085	68260	Trmt12	1.11351	4.86578e-13		ENSMUSG00000028184	99633	Adgrl2	-1.03491	6.96962e-79
ENSMUSG00000074406	232816	Zfp628	1.11399	9.53452e-37		ENSMUSG00000007908	208982	Hmgcll1	-1.0346	5.12552e-09
ENSMUSG00000050503	74165	Fbxl22	1.11427	0.0163339		ENSMUSG00000058656	320679	Samd12	-1.03442	0.000247018
ENSMUSG00000026622	18005	Nek2	1.11828	3.90205e-219		ENSMUSG00000018919	75604	Tm4sf5	-1.03437	0.0001224
ENSMUSG00000045573	18619	Penk	1.12211	4.96377e-05		ENSMUSG00000020253	67905	Ppm1m	-1.03436	1.12893e-63
ENSMUSG00000032014	102644	Oaf	1.12308	2.94431e-09		ENSMUSG00000024885	67689	Aldh3b1	-1.03356	1.88925e-07
ENSMUSG00000031924	66427	Cyb5b	1.12407	4.83765e-228		ENSMUSG00000078954	73167	Arhgap8	-1.03288	3.94097e-53
ENSMUSG00000006412	18637	Pfdn2	1.12422	2.10042e-159		ENSMUSG00000022292	382985	Rrm2b	-1.03213	6.97802e-21
ENSMUSG00000091311	238662	Spata31d1b	1.12672	3.84277e-26		ENSMUSG00000099923	654802	1700105P06Rik	-1.03165	0.0234361
ENSMUSG00000064263	381371	Platr26	1.1281	1.60095e-06		ENSMUSG00000095205	100217436	Snord93	-1.03085	0.0183387
ENSMUSG00000048856	104910	Slc25a47	1.12815	0.000600302		ENSMUSG00000029185	68303	Fam114a1	-1.0304	3.70775e-11
ENSMUSG00000030220	11857	Arhgdib	1.13001	1.41992e-23		ENSMUSG00000040424	233020	Hipk4	-1.02808	8.47712e-06
ENSMUSG00000049288	280411	Lix1l	1.13099	1.23144e-34		ENSMUSG00000027224	213696	Duoxa1	-1.02803	0.0360986
ENSMUSG00000052133	20357	Sema5b	1.13163	1.64897e-51		ENSMUSG00000023192	108068	Grm2	-1.02755	0.0123225
ENSMUSG00000046792	67109	Zfp787	1.13293	3.22969e-27		ENSMUSG00000024855	107975	Pacs1	-1.02748	1.03761e-51
ENSMUSG00000026495	68226	Efcab2	1.13329	2.41616e-21		ENSMUSG00000021238	104776	Aldh6a1	-1.02703	1.29354e-67
ENSMUSG00000040204	68026	Pclaf	1.13511	3.27303e-103		ENSMUSG00000004791	18654	Pgf	-1.02686	0.00176691
ENSMUSG00000028949	66993	Smarcd3	1.13562	1.75628e-32		ENSMUSG00000028940	15206	Hes2	-1.02675	0.000501073
ENSMUSG00000031669	78833	Gins3	1.13876	2.58291e-51		ENSMUSG00000093661	66892	Eif4e3	-1.02604	0.000201714
ENSMUSG00000007097	98660	Atp1a2	1.1401	0.00163122		ENSMUSG00000020277	18641	Pfkl	-1.02524	1.58643e-225
ENSMUSG00000005501	227334	Usp40	1.14098	9.30278e-58		ENSMUSG00000072623	22750	Zfp9	-1.02479	0.0118573
ENSMUSG00000090071	12570	Cdk5r2	1.14216	6.06355e-17		ENSMUSG00000075031	319178	Hist1h2bb	-1.02459	0.032903
ENSMUSG00000053522	16858	Lgals7	1.14401	0.0142607		ENSMUSG00000020940	69441	1700023F06Rik	-1.02264	0.000703812
ENSMUSG00000055184	108900	Fam72a	1.14473	9.58666e-29		ENSMUSG00000038764	545622	Ptpn3	-1.02203	2.23015e-71
ENSMUSG00000021958	72400	Pinx1	1.146	7.01563e-60		ENSMUSG00000038555	225362	Reep2	-1.02194	2.66762e-09
ENSMUSG00000029718	18542	Pcolce	1.14888	2.04209e-153		ENSMUSG00000092035	170676	Peg10	-1.02163	1.50292e-190
ENSMUSG00000006219	74202	Fblim1	1.14994	8.26172e-182		ENSMUSG00000028133	66568	Rwdd3	-1.02143	5.45502e-12
ENSMUSG00000041203	68544	Trir	1.15151	3.75788e-150		ENSMUSG00000025272	56191	Tro	-1.02096	8.16186e-56
ENSMUSG00000022210	28200	Dhrs4	1.15269	8.54889e-60		ENSMUSG00000063109	414094	Dgkeos	-1.01939	0.00578312
ENSMUSG00000018822	54612	Sfrp5	1.15355	4.63441e-06		ENSMUSG00000074006	18378	Omp	-1.01876	0.00454565
ENSMUSG00000102440	93717	Pcdhga9	1.15372	6.76172e-06		ENSMUSG00000006289	66246	Osgep	-1.01846	7.7265e-71
ENSMUSG00000027254	17754	Map1a	1.15514	3.95412e-144		ENSMUSG00000020836	216961	Coro6	-1.01796	2.81724e-05
ENSMUSG00000015340	13058	Cybb	1.15907	2.26452e-05		ENSMUSG00000052658	76100	5830454E08Rik	-1.01743	0.0316335
ENSMUSG00000050677	66717	Ccdc96	1.15965	5.35493e-07		ENSMUSG00000004933	17179	Matk	-1.01659	1.86417e-06
ENSMUSG00000030206	14840	Gsg1	1.15974	0.00632481		ENSMUSG00000062939	20849	Stat4	-1.01628	2.40761e-18
ENSMUSG00000025040	72018	Fundc1	1.16305	1.81318e-45		ENSMUSG00000018012	170758	Rac3	-1.01564	4.96862e-15
ENSMUSG00000041859	17215	Mcm3	1.16345	0		ENSMUSG00000022867	30940	Usp25	-1.01533	6.29276e-29
ENSMUSG00000031160	353283	Eras	1.16678	2.66706e-85		ENSMUSG00000006850	71983	Tmco6	-1.01466	1.15782e-33
ENSMUSG00000031683	78651	Lsm6	1.16696	2.14174e-117		ENSMUSG00000031709	71310	Tbc1d9	-1.01439	8.46734e-29
ENSMUSG00000026377	67949	Nifk	1.16697	5.51679e-146		ENSMUSG00000014554	27369	Dguok	-1.01424	1.03523e-32
ENSMUSG00000046101	240697	Mcmdc2	1.1685	0.00180034		ENSMUSG00000017286	67201	Glod4	-1.01418	1.2842e-79
ENSMUSG00000026254	26987	Eif4e2	1.16855	7.49813e-241		ENSMUSG00000062070	18655	Pgk1	-1.01362	2.14283e-181
ENSMUSG00000045009	210673	Prrt3	1.16911	1.5007e-09		ENSMUSG00000022723	224273	Crybg3	-1.01279	4.05035e-31
ENSMUSG00000031428	66995	Zcchc18	1.16949	6.06771e-07		ENSMUSG00000014786	277973	Slc9a5	-1.01261	8.29887e-26
ENSMUSG00000037070	19656	Rbmxl1	1.17362	5.1208e-200		ENSMUSG00000027249	14061	F2	-1.01218	2.71543e-05
ENSMUSG00000030222	232441	Rerg	1.17395	1.48847e-09		ENSMUSG00000020389	213084	Cdkl3	-1.01192	5.14185e-09
ENSMUSG00000048217	217214	Nags	1.17428	0.000190725		ENSMUSG00000027663	22401	Zmat3	-1.01104	5.14233e-183
ENSMUSG00000075592	277154	Nynrin	1.17561	3.59335e-103		ENSMUSG00000042743	218544	Sgtb	-1.01083	2.2872e-19
ENSMUSG00000030768	68897	Disp1	1.17748	7.02691e-41		ENSMUSG00000027824	56544	Vmn2r1	-1.01019	0.00598729
ENSMUSG00000026175	22349	Vil1	1.17761	2.3321e-09		ENSMUSG00000042961	268780	Egflam	-1.00859	0.0147322
ENSMUSG00000031819	18117	Emc8	1.17829	4.50961e-132		ENSMUSG00000032346	67968	Ooep	-1.00737	3.88438e-60
ENSMUSG00000031781	109006	Ciapin1	1.18053	1.64472e-236		ENSMUSG00000030086	66098	Chchd6	-1.00727	2.09018e-28
ENSMUSG00000026355	17219	Mcm6	1.18079	0		ENSMUSG00000022965	15980	Ifngr2	-1.00723	2.42341e-09
ENSMUSG00000041798	103988	Gck	1.18139	0.000236495		ENSMUSG00000039018	212508	Mtg1	-1.00689	1.36346e-41
ENSMUSG00000031848	50783	Lsm4	1.18178	1.2197e-191		ENSMUSG00000037887	18218	Dusp8	-1.00684	6.34608e-06
ENSMUSG00000017723	67701	Wfdc2	1.18186	6.49403e-26		ENSMUSG00000060461	434423	Dppa5a	-1.00623	4.69374e-150
ENSMUSG00000001027	110880	Scn4a	1.18251	0.0208968		ENSMUSG00000039963	207607	Ccdc40	-1.00485	9.7173e-22
ENSMUSG00000052934	76454	Fbxo31	1.18601	2.46454e-97		ENSMUSG00000070348	12443	Ccnd1	-1.00477	2.40722e-142
ENSMUSG00000069227	26913	Gprin1	1.19126	5.47323e-05		ENSMUSG00000054978	74492	Kbtbd13	-1.00432	2.88042e-05
ENSMUSG00000053475	21930	Tnfaip6	1.19173	0.000141502		ENSMUSG00000095789	69034	Nupr1l	-1.00391	0.00561146
ENSMUSG00000020871	13394	Dlx4	1.19227	0.000935356		ENSMUSG00000021838	74480	Samd4	-1.00379	3.61739e-06
ENSMUSG00000028655	76574	Mfsd2a	1.1925	0.00161453		ENSMUSG00000030089	71699	Slc41a3	-1.00366	5.99569e-05
ENSMUSG00000042988	77583	Notum	1.19264	2.89422e-40		ENSMUSG00000049154	75429	Fam183b	-1.00344	0.0100546
ENSMUSG00000044017	243277	Adgrd1	1.19292	2.38971e-30		ENSMUSG00000037166	68458	Ppp1r14a	-1.00313	1.16284e-13
ENSMUSG00000024667	68642	Tmem216	1.19388	1.51355e-26		ENSMUSG00000039704	320506	Lmbrd2	-1.0025	4.67876e-31
ENSMUSG00000017667	228876	Zfp334	1.19427	4.01941e-57		ENSMUSG00000075704	26462	Txnrd2	-1.00229	5.94076e-10
ENSMUSG00000050931	74442	Sgms2	1.19461	6.77338e-25		ENSMUSG00000078794	629378	Dact3	-1.002	4.52519e-46
ENSMUSG00000026154	68002	Sdhaf4	1.19651	3.26512e-32		ENSMUSG00000004633	69993	Chn2	-1.00107	6.56547e-10
ENSMUSG00000025933	75712	Tmem14a	1.19711	8.18679e-11		ENSMUSG00000030177	67200	Ccdc77	-1.00056	1.62965e-74
ENSMUSG00000031843	68533	Mphosph6	1.19821	4.1129e-85		ENSMUSG00000040532	68758	Abhd11	-1.00015	2.90068e-61
ENSMUSG00000087107	100043636	AI662270	1.19921	0.0350368		ENSMUSG00000028789	242669	Azin2	-1.00012	1.50499e-27
ENSMUSG00000061086	17896	Myl4	1.20201	1.12831e-11		ENSMUSG00000030851	16833	Ldhc	1.00106	3.15732e-05
ENSMUSG00000079363	17472	Gbp4	1.20266	0.00542701		ENSMUSG00000016427	54405	Ndufa1	1.00113	1.62802e-71
ENSMUSG00000053654	68239	Krt42	1.20406	7.39475e-47		ENSMUSG00000028538	20441	St3gal3	1.00126	7.82627e-53
ENSMUSG00000036537	69942	Rnf113a1	1.20433	3.42861e-24		ENSMUSG00000020346	17308	Mgat1	1.00184	1.09981e-43
ENSMUSG00000030302	11941	Atp2b2	1.20493	7.98472e-10		ENSMUSG00000012519	74568	Mlkl	1.00198	0.000215943
ENSMUSG00000029658	381693	Wdr95	1.20505	0.0061668		ENSMUSG00000042073	76491	Abhd14b	1.00288	1.86038e-13
ENSMUSG00000017499	23834	Cdc6	1.20628	2.41134e-180		ENSMUSG00000062296	320429	Trank1	1.0035	1.8699e-09
ENSMUSG00000097768	102633000	2310043M15Rik	1.20682	4.57289e-21		ENSMUSG00000031618	110784	Nr3c2	1.00471	6.92197e-06
ENSMUSG00000050751	209966	Pgbd5	1.20692	4.46247e-13		ENSMUSG00000023868	23984	Pde10a	1.00519	0.000625739
ENSMUSG00000015023	13680	Ddx19a	1.20702	2.29047e-117		ENSMUSG00000042750	12069	Bex2	1.00616	3.35117e-63
ENSMUSG00000044707	380694	Ccnjl	1.20706	5.13626e-11		ENSMUSG00000071648	19881	Rom1	1.00735	7.38447e-06
ENSMUSG00000096879	229571	Gm4858	1.20747	0.0161271		ENSMUSG00000104346	93711	Pcdhga3	1.00768	5.6479e-05
ENSMUSG00000058022	109254	Adtrp	1.20837	0.0341969		ENSMUSG00000043432	243813	Leng9	1.0089	0.0038375
ENSMUSG00000033268	99439	Duox1	1.2095	1.52675e-09		ENSMUSG00000044197	80290	Gpr146	1.00958	0.00499192
ENSMUSG00000027296	228550	Itpka	1.20952	1.96467e-28		ENSMUSG00000038354	213121	Ankrd35	1.00994	1.51321e-39
ENSMUSG00000040220	104346	Gas8	1.20994	2.14933e-37		ENSMUSG00000036769	72404	Wdr44	1.01017	7.63781e-43
ENSMUSG00000035551	75426	Igfbpl1	1.2132	4.83807e-14		ENSMUSG00000024330	12815	Col11a2	1.01023	0.00019433
ENSMUSG00000075297	667281	H60b	1.21473	1.18383e-12		ENSMUSG00000028931	16498	Kcnab2	1.01071	2.12761e-06
ENSMUSG00000043419	80515	Chd3os	1.21681	7.90337e-13		ENSMUSG00000038400	65112	Pmepa1	1.01202	3.76652e-57
ENSMUSG00000031851	66566	Ntpcr	1.21697	6.40816e-62		ENSMUSG00000045917	230279	Tmem268	1.0123	3.9901e-26
ENSMUSG00000079871	245347	Gm4984	1.21892	2.84403e-07		ENSMUSG00000067370	54218	B3galt4	1.01299	1.09781e-05
ENSMUSG00000031163	69824	Glod5	1.22351	1.62154e-08		ENSMUSG00000026283	66262	Ing5	1.01341	5.50439e-140
ENSMUSG00000038236	15404	Hoxa7	1.2239	1.07308e-06		ENSMUSG00000033491	244954	Prss35	1.01473	3.58424e-16
ENSMUSG00000031167	19652	Rbm3	1.22411	6.37313e-289		ENSMUSG00000042631	228787	Xkr7	1.01518	4.22654e-06
ENSMUSG00000058976	13532	Usp17lc	1.22485	1.81929e-05		ENSMUSG00000040249	16971	Lrp1	1.01528	4.98926e-75
ENSMUSG00000031171	54632	Ftsj1	1.226	2.33203e-106		ENSMUSG00000027831	72789	Veph1	1.0155	0.00286051
ENSMUSG00000023094	76467	Msrb2	1.22608	2.47279e-21		ENSMUSG00000072653	232785	Zfp783	1.01555	4.01886e-07
ENSMUSG00000097134	68488	1110002J07Rik	1.22768	2.49304e-17		ENSMUSG00000040761	56381	Spen	1.0162	6.96649e-35
ENSMUSG00000010136	100503311	Pifo	1.22769	0.0171894		ENSMUSG00000030830	16408	Itgal	1.01658	3.39377e-22
ENSMUSG00000095180	18617	Rhox5	1.23008	1.66907e-164		ENSMUSG00000089872	320119	Rps6kc1	1.0166	1.57926e-69
ENSMUSG00000028602	21941	Tnfrsf8	1.23027	5.04696e-16		ENSMUSG00000003051	13710	Elf3	1.01677	3.58585e-61
ENSMUSG00000026694	71449	Mettl13	1.23116	2.51378e-137		ENSMUSG00000026074	26921	Map4k4	1.01827	5.21403e-229
ENSMUSG00000062380	22152	Tubb3	1.23249	1.85344e-94		ENSMUSG00000089774	53881	Slc5a3	1.01834	3.45076e-26
ENSMUSG00000069272	319166	Hist1h2ae	1.23332	6.23299e-07		ENSMUSG00000034189	72552	Hsdl1	1.01874	5.80754e-52
ENSMUSG00000031896	109660	Ctrl	1.23572	5.19827e-05		ENSMUSG00000024667	68642	Tmem216	1.01906	1.22986e-19
ENSMUSG00000079278	545798	Tmem233	1.23692	0.00171371		ENSMUSG00000044229	244853	Nxpe4	1.01951	4.68093e-05
ENSMUSG00000032313	244886	Tmem266	1.2373	1.44904e-08		ENSMUSG00000025792	27376	Slc25a10	1.02019	1.88378e-27
ENSMUSG00000029821	54722	Dfna5	1.23824	6.53383e-05		ENSMUSG00000003382	27049	Etv3	1.02086	1.74123e-59
ENSMUSG00000031158	21855	Timm17b	1.24031	1.18254e-102		ENSMUSG00000020620	27404	Abca8b	1.02093	0.00130729
ENSMUSG00000047485	245683	Klhl34	1.24076	0.00373105		ENSMUSG00000060803	14870	Gstp1	1.02098	6.77168e-87
ENSMUSG00000029320	74218	1700016H13Rik	1.24169	0.023933		ENSMUSG00000031979	76332	Cog2	1.02175	1.27846e-86
ENSMUSG00000031079	245368	Zfp300	1.24659	6.08554e-05		ENSMUSG00000026640	18845	Plxna2	1.02198	2.84238e-14
ENSMUSG00000040263	234825	Klhdc4	1.25207	1.94e-252		ENSMUSG00000073295	58242	Nudt11	1.0221	2.40381e-19
ENSMUSG00000037492	320158	Zmat4	1.25239	3.00343e-27		ENSMUSG00000031827	72042	Cotl1	1.024	1.06123e-122
ENSMUSG00000021947	68631	Cryl1	1.25402	5.88004e-33		ENSMUSG00000039137	73750	Whrn	1.02421	5.19827e-53
ENSMUSG00000031174	19893	Rpgr	1.25457	2.15333e-79		ENSMUSG00000049382	16691	Krt8	1.02494	7.04219e-81
ENSMUSG00000025330	18602	Padi4	1.25602	1.05196e-14		ENSMUSG00000010175	19130	Prox1	1.02598	0.010079
ENSMUSG00000026032	66495	Ndufb3	1.25667	8.02272e-98		ENSMUSG00000097326	320315	A330048O09Rik	1.02649	0.0271438
ENSMUSG00000051176	22702	Zfp42	1.25684	0		ENSMUSG00000031832	21341	Taf1c	1.02659	9.07161e-72
ENSMUSG00000066456	94353	Hmgn3	1.25699	4.10875e-08		ENSMUSG00000085347	70162	Hk1os	1.0267	0.0314394
ENSMUSG00000031755	67378	Bbs2	1.25757	4.86076e-94		ENSMUSG00000033191	21846	Tie1	1.02672	0.000477862
ENSMUSG00000017493	16010	Igfbp4	1.25923	8.30073e-16		ENSMUSG00000037579	16512	Kcnh3	1.02759	2.35833e-18
ENSMUSG00000020086	404634	H2afy2	1.25986	6.867e-107		ENSMUSG00000039891	378431	Txlnb	1.0301	2.57636e-06
ENSMUSG00000013698	18611	Pea15a	1.2611	4.54933e-97		ENSMUSG00000072647	280668	Adam1a	1.03042	0.0121457
ENSMUSG00000023000	13363	Dhh	1.26168	0.000670461		ENSMUSG00000031937	69137	Vstm5	1.03095	3.08424e-05
ENSMUSG00000035493	21810	Tgfbi	1.26412	1.12214e-52		ENSMUSG00000057715	320492	A830018L16Rik	1.03138	2.1273e-12
ENSMUSG00000040592	15985	Cd79b	1.26513	1.09358e-05		ENSMUSG00000020067	68802	Mypn	1.03258	5.37114e-14
ENSMUSG00000021056	80384	Tex21	1.26885	7.31547e-16		ENSMUSG00000003458	59287	Ncstn	1.0349	2.85813e-127
ENSMUSG00000005481	68278	Ddx39	1.26889	0		ENSMUSG00000049339	227298	Retreg2	1.03586	2.07451e-67
ENSMUSG00000026398	26424	Nr5a2	1.27007	6.88364e-185		ENSMUSG00000026204	19275	Ptprn	1.03632	8.26129e-34
ENSMUSG00000066357	83669	Wdr6	1.27147	5.03547e-192		ENSMUSG00000031257	237038	Nox1	1.03694	0.0232679
ENSMUSG00000020169	382427	Best3	1.27541	0.00951916		ENSMUSG00000039539	244431	Sgcz	1.03717	0.0377729
ENSMUSG00000054034	331532	Tceal5	1.27637	1.24796e-05		ENSMUSG00000022809	18171	Nr1i2	1.03746	0.0356125
ENSMUSG00000002190	12745	Clgn	1.2767	4.77453e-70		ENSMUSG00000028040	13639	Efna4	1.03782	2.17449e-36
ENSMUSG00000026162	75570	Nhej1	1.27786	3.79165e-14		ENSMUSG00000037771	22348	Slc32a1	1.03807	0.000319657
ENSMUSG00000065546	387191	Mir196a-1	1.27854	0.000102838		ENSMUSG00000029608	19894	Rph3a	1.03844	0.0185625
ENSMUSG00000022223	654795	Sdr39u1	1.28047	5.18602e-32		ENSMUSG00000068048	104384	Rhox9	1.03925	7.93603e-07
ENSMUSG00000092569	102636262	Gm20544	1.28176	3.6937e-07		ENSMUSG00000023830	16004	Igf2r	1.03959	1.00084e-147
ENSMUSG00000056758	15364	Hmga2	1.28185	7.05248e-119		ENSMUSG00000029097	78890	Trmt44	1.03977	1.22668e-28
ENSMUSG00000074607	269389	Tox2	1.28414	0.000478966		ENSMUSG00000025040	72018	Fundc1	1.03984	1.50497e-36
ENSMUSG00000022805	320214	Maats1	1.28487	2.14072e-16		ENSMUSG00000006800	72043	Sulf2	1.03993	8.22422e-264
ENSMUSG00000037434	22782	Slc30a1	1.28585	9.20689e-140		ENSMUSG00000042524	223697	Sun2	1.04075	1.23685e-72
ENSMUSG00000060519	30935	Tor3a	1.28593	2.58444e-98		ENSMUSG00000046173	67543	Pabpc6	1.04112	0.00470605
ENSMUSG00000009876	84682	Cox4i2	1.28974	4.37033e-06		ENSMUSG00000047843	55950	Bri3	1.04132	2.98209e-62
ENSMUSG00000052117	242484	D630039A03Rik	1.29007	2.05742e-05		ENSMUSG00000000120	18053	Ngfr	1.04134	1.09978e-34
ENSMUSG00000054855	223881	Rnd1	1.29307	1.43052e-25		ENSMUSG00000029135	14284	Fosl2	1.04159	2.43515e-10
ENSMUSG00000031897	19171	Psmb10	1.29463	4.94091e-55		ENSMUSG00000028072	18211	Ntrk1	1.04222	1.17322e-08
ENSMUSG00000071176	234094	Arhgef10	1.29876	3.01177e-90		ENSMUSG00000038692	15412	Hoxb4	1.04274	0.0166318
ENSMUSG00000036959	320376	Bcorl1	1.29962	9.26511e-47		ENSMUSG00000031093	75974	Dock11	1.04302	2.34451e-75
ENSMUSG00000040666	50795	Sh3bgr	1.30014	0.00161714		ENSMUSG00000042258	16392	Isl1	1.04421	0.000233532
ENSMUSG00000034224	234788	Slc38a8	1.30047	0.00464181		ENSMUSG00000021696	74559	Elovl7	1.04439	3.82124e-27
ENSMUSG00000022099	13829	Dmtn	1.3014	2.8178e-241		ENSMUSG00000021211	622402	Akr1c12	1.04447	0.010508
ENSMUSG00000026238	19231	Ptma	1.30878	0		ENSMUSG00000042082	11881	Arsb	1.04518	7.77658e-06
ENSMUSG00000038793	13590	Lefty1	1.31156	1.16979e-22		ENSMUSG00000030898	12426	Cckbr	1.04604	0.016119
ENSMUSG00000040026	20210	Saa3	1.31675	0.00136896		ENSMUSG00000055780	83563	Usp26	1.04609	2.56603e-10
ENSMUSG00000019944	69288	Rhobtb1	1.31788	1.94185e-09		ENSMUSG00000046792	67109	Zfp787	1.04634	2.00229e-23
ENSMUSG00000096014	20664	Sox1	1.31911	1.55104e-61		ENSMUSG00000032840	76792	2410131K14Rik	1.04656	7.86766e-52
ENSMUSG00000108337	244061	Gm4971	1.32192	4.51254e-06		ENSMUSG00000059022	333088	Kcp	1.0472	2.4627e-14
ENSMUSG00000107666	102639979	4933406J09Rik	1.32556	0.00636462		ENSMUSG00000045216	50785	Hs6st1	1.04721	1.97278e-154
ENSMUSG00000050538	68127	B230217C12Rik	1.32634	4.91675e-19		ENSMUSG00000046338	215456	Gpat2	1.04741	2.44991e-26
ENSMUSG00000037461	77065	Ints7	1.32725	2.5462e-257		ENSMUSG00000046709	26414	Mapk10	1.04832	0.0133165
ENSMUSG00000040601	243880	Nlrp4a	1.32993	8.2585e-05		ENSMUSG00000041959	20194	S100a10	1.04844	2.85581e-77
ENSMUSG00000047250	19224	Ptgs1	1.33367	5.65972e-09		ENSMUSG00000020566	68775	Atp6v1c2	1.04875	0.0287295
ENSMUSG00000050534	15564	Htr5b	1.3339	0.00780673		ENSMUSG00000067261	15221	Foxd3	1.04875	4.45265e-20
ENSMUSG00000026605	108000	Cenpf	1.33561	1.0997e-256		ENSMUSG00000026155	98366	Smap1	1.0497	3.87572e-158
ENSMUSG00000027947	16194	Il6ra	1.33897	3.08072e-12		ENSMUSG00000045318	11553	Adra2c	1.04979	0.0300015
ENSMUSG00000026074	26921	Map4k4	1.34131	0		ENSMUSG00000026123	226971	Plekhb2	1.04989	1.62866e-68
ENSMUSG00000029153	433904	Ociad2	1.34882	1.41348e-12		ENSMUSG00000008206	67260	Cers4	1.05004	1.17446e-56
ENSMUSG00000028820	71514	Sfpq	1.35379	3.03535e-229		ENSMUSG00000025185	67573	Loxl4	1.05025	3.83883e-05
ENSMUSG00000015476	260297	Prrt1	1.35568	0.00887035		ENSMUSG00000069114	229055	Zbtb10	1.05095	3.81763e-78
ENSMUSG00000026494	269152	Kif26b	1.35568	3.57914e-07		ENSMUSG00000003559	57344	As3mt	1.05168	1.21721e-39
ENSMUSG00000094973	668137	Gm8994	1.358	5.18827e-15		ENSMUSG00000061410	142682	Zcchc14	1.05266	1.97553e-108
ENSMUSG00000048655	320604	Ccdc169	1.35803	0.00992041		ENSMUSG00000003573	26558	Homer3	1.05299	3.51627e-64
ENSMUSG00000027861	12373	Casq2	1.35856	3.21848e-05		ENSMUSG00000041359	21432	Tcl1	1.05551	9.28253e-117
ENSMUSG00000097129	74706	4930507D05Rik	1.35859	0.0105764		ENSMUSG00000050157	333670	Gm867	1.05654	4.69236e-11
ENSMUSG00000031157	54633	Pqbp1	1.36129	3.14903e-155		ENSMUSG00000043251	277978	Exoc3l	1.05718	8.36947e-51
ENSMUSG00000087283	100039176	Gm13580	1.36244	2.40775e-08		ENSMUSG00000029436	23948	Mmp17	1.05721	9.9149e-69
ENSMUSG00000026385	13167	Dbi	1.3637	4.09706e-126		ENSMUSG00000031790	17388	Mmp15	1.05747	6.36328e-27
ENSMUSG00000055833	98736	1700034H15Rik	1.36504	3.70243e-10		ENSMUSG00000018750	75580	Zbtb4	1.05756	5.97885e-10
ENSMUSG00000007721	234388	Ccdc124	1.36637	1.62727e-218		ENSMUSG00000025076	12369	Casp7	1.05757	3.15144e-32
ENSMUSG00000027520	73884	Zdbf2	1.37022	3.21539e-32		ENSMUSG00000074607	269389	Tox2	1.05819	0.00366838
ENSMUSG00000052384	224109	Nrros	1.37053	5.57519e-15		ENSMUSG00000055027	12180	Smyd1	1.05831	5.58545e-14
ENSMUSG00000030359	11287	Pzp	1.37454	0.00176622		ENSMUSG00000051236	320183	Msrb3	1.0598	9.1816e-07
ENSMUSG00000031506	320139	Ptpn7	1.37943	3.92085e-12		ENSMUSG00000070056	52065	Mfhas1	1.06009	7.45438e-16
ENSMUSG00000043300	26879	B3galnt1	1.38262	1.45085e-50		ENSMUSG00000031778	20312	Cx3cl1	1.06014	1.7432e-11
ENSMUSG00000020682	118453	Mmp28	1.38336	2.80264e-28		ENSMUSG00000024784	170458	Gpha2	1.06018	0.0205203
ENSMUSG00000009418	215690	Nav1	1.38397	3.77074e-158		ENSMUSG00000039315	27278	Clnk	1.0612	2.94741e-05
ENSMUSG00000057967	14172	Fgf18	1.38979	7.99001e-15		ENSMUSG00000026728	22352	Vim	1.0615	3.17803e-155
ENSMUSG00000031143	54638	Ccdc22	1.38986	2.38723e-23		ENSMUSG00000018999	58246	Slc35b4	1.06155	1.77492e-66
ENSMUSG00000056738	329513	A730036I17Rik	1.39392	3.98827e-07		ENSMUSG00000067851	211673	Arfgef1	1.06289	1.26968e-162
ENSMUSG00000022012	239188	Enox1	1.39725	1.17364e-27		ENSMUSG00000031805	16453	Jak3	1.06314	1.76645e-84
ENSMUSG00000063018	68355	2010204K13Rik	1.40024	2.16849e-75		ENSMUSG00000027340	54338	Slc23a2	1.06372	1.28965e-126
ENSMUSG00000083270	227885	Gm13498	1.40028	0.00138855		ENSMUSG00000040616	214359	Tmem51	1.06433	9.58815e-45
ENSMUSG00000032024	71566	Clmp	1.40119	1.3047e-15		ENSMUSG00000034201	78926	Gas2l1	1.06439	2.67203e-60
ENSMUSG00000070691	12399	Runx3	1.40208	1.83634e-14		ENSMUSG00000028458	21754	Tesk1	1.06709	9.4114e-44
ENSMUSG00000037568	226841	Vash2	1.40452	5.55426e-43		ENSMUSG00000043903	195209	Zfp469	1.0671	0.0477831
ENSMUSG00000026211	98733	Obsl1	1.40492	2.14278e-232		ENSMUSG00000020333	216739	Acsl6	1.06761	7.76575e-24
ENSMUSG00000072884	100038378	Gm10433	1.40608	0.00144997		ENSMUSG00000015023	13680	Ddx19a	1.06807	4.39986e-92
ENSMUSG00000070942	107527	Il1rl2	1.40827	2.94764e-05		ENSMUSG00000028164	110173	Manba	1.06917	5.90679e-89
ENSMUSG00000043051	244667	Disc1	1.40935	0.000194227		ENSMUSG00000052928	269037	Ctif	1.06961	8.93733e-29
ENSMUSG00000047361	381260	Gm973	1.41266	3.98565e-16		ENSMUSG00000055254	18212	Ntrk2	1.06962	0.000339674
ENSMUSG00000042401	72832	Crtac1	1.42331	1.93804e-26		ENSMUSG00000070388	628100	Fbxo39	1.0699	0.0167732
ENSMUSG00000097248	100040294	Gm2694	1.42394	5.04661e-18		ENSMUSG00000032528	22354	Vipr1	1.0709	0.000780603
ENSMUSG00000039410	70673	Prdm16	1.42396	2.63501e-49		ENSMUSG00000043019	66967	Edem3	1.07163	1.36271e-113
ENSMUSG00000026564	240892	Dusp27	1.42402	1.13511e-157		ENSMUSG00000020062	216225	Slc5a8	1.07264	0.0337408
ENSMUSG00000020251	74782	Glt8d2	1.42672	0.0113166		ENSMUSG00000022206	18162	Npr3	1.07358	5.04186e-16
ENSMUSG00000044041	16663	Krt13	1.42959	0.0011843		ENSMUSG00000029313	17355	Aff1	1.07438	5.07653e-128
ENSMUSG00000074365	546024	Crxos	1.43152	2.6744e-05		ENSMUSG00000041420	17537	Meis3	1.07517	1.9031e-06
ENSMUSG00000018411	17762	Mapt	1.43362	2.29431e-98		ENSMUSG00000057093	112415	Zfp607b	1.07672	2.34466e-26
ENSMUSG00000021055	13983	Esr2	1.43438	0.00898314		ENSMUSG00000031591	11886	Asah1	1.07682	1.38874e-207
ENSMUSG00000031827	72042	Cotl1	1.43574	9.45767e-245		ENSMUSG00000075289	107239	Carns1	1.0769	3.57989e-05
ENSMUSG00000027514	58203	Zbp1	1.43647	0.0050352		ENSMUSG00000046546	224093	Fam43a	1.07756	5.68816e-80
ENSMUSG00000026480	17970	Ncf2	1.43827	2.31848e-12		ENSMUSG00000050335	16854	Lgals3	1.07769	2.96211e-45
ENSMUSG00000024619	12590	Cdx1	1.44557	6.13749e-13		ENSMUSG00000031734	16373	Irx3	1.07949	0.0014186
ENSMUSG00000034786	106512	Gpsm3	1.44622	2.63758e-21		ENSMUSG00000039382	54636	Wdr45	1.08076	8.01192e-70
ENSMUSG00000036598	244608	Ccdc113	1.45576	1.01037e-08		ENSMUSG00000050830	319922	Vwc2	1.08205	0.0121658
ENSMUSG00000051527	57775	Usp29	1.4579	4.82888e-11		ENSMUSG00000052675	57745	Zfp112	1.0831	0.000278317
ENSMUSG00000005892	22044	Trh	1.46068	2.63253e-144		ENSMUSG00000020420	545938	Zfp607a	1.08347	8.68576e-17
ENSMUSG00000032360	387285	Hcrtr2	1.46087	0.00868565		ENSMUSG00000025658	245684	Cnksr2	1.08492	1.11372e-09
ENSMUSG00000048814	381338	Lonrf2	1.46176	5.62451e-20		ENSMUSG00000026483	63913	Fam129a	1.08574	1.00212e-196
ENSMUSG00000043773	69430	1700048O20Rik	1.46205	0.00561837		ENSMUSG00000103472	93715	Pcdhga7	1.08582	6.02348e-08
ENSMUSG00000067338	22147	Tuba3b	1.46272	0.000106189		ENSMUSG00000054161	73813	Fam83e	1.08629	0.0131516
ENSMUSG00000031561	23965	Tenm3	1.47031	3.22469e-155		ENSMUSG00000002345	72368	Borcs8	1.0873	2.95887e-37
ENSMUSG00000026246	11650	Alppl2	1.47297	0.012316		ENSMUSG00000036699	72693	Zcchc12	1.08967	2.32082e-05
ENSMUSG00000032470	17532	Mras	1.47365	3.17799e-198		ENSMUSG00000042821	20613	Snai1	1.09047	4.02387e-13
ENSMUSG00000100916	16866	Lhb	1.47547	0.00028613		ENSMUSG00000051343	52055	Rab11fip5	1.09166	6.56402e-63
ENSMUSG00000105960	319224	6330410L21Rik	1.48131	0.000108973		ENSMUSG00000043986	238663	Spata31d1d	1.09261	0.00921457
ENSMUSG00000086494	70138	2210417A02Rik	1.48135	0.00464371		ENSMUSG00000024742	14156	Fen1	1.09575	1.80418e-145
ENSMUSG00000001025	20200	S100a6	1.48206	6.56662e-63		ENSMUSG00000033327	81877	Tnxb	1.09602	5.78201e-05
ENSMUSG00000030523	17364	Trpm1	1.48659	2.56393e-11		ENSMUSG00000038398	67031	Upf3a	1.0965	4.12899e-96
ENSMUSG00000071324	213402	Armc2	1.48668	4.72357e-07		ENSMUSG00000026768	241226	Itga8	1.09676	1.23577e-24
ENSMUSG00000066687	235320	Zbtb16	1.48897	0.00249952		ENSMUSG00000029304	20750	Spp1	1.09709	8.51567e-268
ENSMUSG00000031654	12404	Cbln1	1.49262	2.46726e-15		ENSMUSG00000064140	214158	Trim38	1.0971	0.0348694
ENSMUSG00000071478	319165	Hist1h2ad	1.49368	0.00728152		ENSMUSG00000073294	102991	AU022751	1.09745	1.29542e-13
ENSMUSG00000024300	17916	Myo1f	1.49504	5.59792e-64		ENSMUSG00000009569	239719	Mkl2	1.09754	3.11808e-55
ENSMUSG00000015879	58227	Fam184b	1.49808	4.56083e-09		ENSMUSG00000046607	12123	Hrk	1.09763	1.44482e-35
ENSMUSG00000026073	16178	Il1r2	1.49931	0.00319067		ENSMUSG00000027102	15437	Hoxd8	1.09889	0.00858372
ENSMUSG00000018168	22780	Ikzf3	1.5013	1.88162e-06		ENSMUSG00000073130	382221	Gm1141	1.09918	0.0046495
ENSMUSG00000012819	22295	Cdh23	1.50644	8.25508e-10		ENSMUSG00000001065	57247	Zfp276	1.09934	1.65363e-30
ENSMUSG00000029814	140488	Igf2bp3	1.50736	5.89062e-291		ENSMUSG00000039089	237339	L3mbtl3	1.09941	2.69539e-26
ENSMUSG00000000739	57429	Sult5a1	1.5103	6.75678e-11		ENSMUSG00000016528	17164	Mapkapk2	1.09945	8.44025e-66
ENSMUSG00000032589	12217	Bsn	1.51326	1.90755e-25		ENSMUSG00000021256	238328	Vash1	1.09975	5.41575e-31
ENSMUSG00000051236	320183	Msrb3	1.51391	1.74901e-12		ENSMUSG00000056050	338366	Mia3	1.10031	1.48444e-113
ENSMUSG00000031778	20312	Cx3cl1	1.5165	1.94693e-22		ENSMUSG00000026698	67292	Pigc	1.10066	3.18605e-24
ENSMUSG00000033770	12733	Clcnka	1.51888	5.26212e-07		ENSMUSG00000025402	17937	Nab2	1.10081	7.37306e-45
ENSMUSG00000045826	19265	Ptprcap	1.52708	0.00915343		ENSMUSG00000030411	384569	Nova2	1.10169	1.09848e-30
ENSMUSG00000026207	11790	Speg	1.5273	1.51063e-65		ENSMUSG00000038914	23856	Dido1	1.10281	9.17661e-131
ENSMUSG00000034829	234404	Nxnl1	1.52827	0.00308643		ENSMUSG00000022514	16180	Il1rap	1.10326	6.71501e-07
ENSMUSG00000042215	213539	Bag2	1.53008	2.98845e-40		ENSMUSG00000015837	18412	Sqstm1	1.10437	7.47841e-174
ENSMUSG00000044646	207259	Zbtb7c	1.53112	6.85994e-64		ENSMUSG00000025192	93685	Entpd7	1.10486	7.29639e-24
ENSMUSG00000041849	239319	Card6	1.5315	5.18991e-17		ENSMUSG00000029644	18609	Pdx1	1.10642	0.0146849
ENSMUSG00000040740	384071	Slc25a34	1.53183	0.00108304		ENSMUSG00000031105	20523	Slc25a14	1.10661	3.46109e-12
ENSMUSG00000031478	23954	Nek3	1.53399	1.77005e-57		ENSMUSG00000021381	12022	Barx1	1.10663	0.00014096
ENSMUSG00000026637	22033	Traf5	1.54277	1.84233e-09		ENSMUSG00000011034	20537	Slc5a1	1.10718	3.31884e-07
ENSMUSG00000067616	56538	Klk11	1.543	5.06291e-09		ENSMUSG00000026308	70788	Klhl30	1.10763	0.0311016
ENSMUSG00000017950	15378	Hnf4a	1.54426	4.10111e-17		ENSMUSG00000058248	16510	Kcnh1	1.10879	1.52158e-06
ENSMUSG00000032554	22041	Trf	1.54684	1.05842e-15		ENSMUSG00000031158	21855	Timm17b	1.11015	2.32692e-82
ENSMUSG00000018474	216848	Chd3	1.54776	3.09736e-142		ENSMUSG00000031812	67443	Map1lc3b	1.11147	1.18819e-160
ENSMUSG00000015812	14714	Gnrh1	1.54948	0.00355185		ENSMUSG00000004263	13498	Atn1	1.11192	1.78223e-20
ENSMUSG00000041556	230904	Fbxo2	1.55184	1.73986e-111		ENSMUSG00000037461	77065	Ints7	1.1127	2.58376e-180
ENSMUSG00000031803	72297	B3gnt3	1.55817	1.65813e-16		ENSMUSG00000039158	100182	Akna	1.11308	1.36352e-63
ENSMUSG00000049191	331474	Rgag4	1.56853	0.0148319		ENSMUSG00000051223	66882	Bzw1	1.11324	9.37797e-182
ENSMUSG00000063239	268934	Grm4	1.58032	1.58108e-13		ENSMUSG00000037709	58909	Fam13a	1.11473	0.000196712
ENSMUSG00000026208	13346	Des	1.58393	7.70776e-136		ENSMUSG00000025370	12565	Cdh9	1.11529	0.00963222
ENSMUSG00000037784	72507	Dzip1l	1.58519	4.29623e-44		ENSMUSG00000028551	12580	Cdkn2c	1.11618	2.75975e-06
ENSMUSG00000032291	12903	Crabp1	1.58613	2.29225e-56		ENSMUSG00000036206	98402	Sh3bp4	1.11674	8.4308e-122
ENSMUSG00000024245	68027	Tmem178	1.58655	7.18435e-05		ENSMUSG00000060512	76261	0610040J01Rik	1.11717	3.10614e-07
ENSMUSG00000015468	18132	Notch4	1.58915	1.43288e-78		ENSMUSG00000031176	67117	Dynlt3	1.11723	5.4968e-58
ENSMUSG00000016239	74365	Lonrf3	1.59536	1.71781e-21		ENSMUSG00000031558	20563	Slit2	1.11782	7.6698e-09
ENSMUSG00000007872	15903	Id3	1.60182	2.79058e-108		ENSMUSG00000018474	216848	Chd3	1.11797	3.15057e-73
ENSMUSG00000079330	213409	Lemd1	1.61343	3.68743e-69		ENSMUSG00000056501	12608	Cebpb	1.11826	3.68466e-45
ENSMUSG00000061524	22772	Zic2	1.61407	1.66368e-43		ENSMUSG00000024240	13831	Epc1	1.11974	1.90178e-91
ENSMUSG00000071347	239126	C1qtnf9	1.62009	0.000122758		ENSMUSG00000024423	16210	Impact	1.12013	9.92193e-253
ENSMUSG00000046719	104079	Nxph3	1.62775	5.23875e-12		ENSMUSG00000073478	100504360	D730003I15Rik	1.12043	0.00140586
ENSMUSG00000022941	170765	Ripply3	1.62816	1.31654e-19		ENSMUSG00000028214	14579	Gem	1.12156	0.000430862
ENSMUSG00000026674	18214	Ddr2	1.62854	1.6716e-13		ENSMUSG00000039699	74481	Batf2	1.12244	0.0152919
ENSMUSG00000020701	270893	Tmem132e	1.63145	0.0177043		ENSMUSG00000040007	228536	Bahd1	1.12345	1.54977e-61
ENSMUSG00000046846	66712	Spesp1	1.6376	8.93421e-10		ENSMUSG00000031762	17750	Mt2	1.12399	3.03621e-165
ENSMUSG00000048078	23966	Tenm4	1.63902	3.4715e-68		ENSMUSG00000046269	54651	Usp27x	1.12447	2.81774e-33
ENSMUSG00000055555	75013	4930502E18Rik	1.64033	2.40455e-08		ENSMUSG00000012123	230806	Crybg2	1.1245	1.93716e-60
ENSMUSG00000031147	54634	Magix	1.64153	0.00920606		ENSMUSG00000033634	93673	Nat8f2	1.12468	0.00176562
ENSMUSG00000085843	399570	Kank4os	1.64306	2.62936e-08		ENSMUSG00000029534	64213	St7	1.12477	2.56965e-11
ENSMUSG00000074269	73673	Rec114	1.64357	2.24431e-29		ENSMUSG00000045672	373864	Col27a1	1.12524	9.66785e-12
ENSMUSG00000051331	12288	Cacna1c	1.64839	4.18467e-06		ENSMUSG00000047181	217125	Samd14	1.12559	7.55621e-05
ENSMUSG00000003279	224997	Dlgap1	1.65117	2.7347e-13		ENSMUSG00000043592	76589	Unc5cl	1.12855	2.31481e-05
ENSMUSG00000081984	15504	Dnajb3	1.65733	3.5638e-09		ENSMUSG00000047150	75462	1700001C19Rik	1.12863	0.0152506
ENSMUSG00000044708	16513	Kcnj10	1.66166	1.59493e-39		ENSMUSG00000042388	242667	Dlgap3	1.13019	6.0868e-110
ENSMUSG00000008035	68041	Mid1ip1	1.66331	1.45822e-251		ENSMUSG00000070327	672511	Rnf213	1.13047	3.95978e-72
ENSMUSG00000057337	53374	Chst3	1.66467	8.23397e-35		ENSMUSG00000028042	22724	Zbtb7b	1.13082	2.95405e-82
ENSMUSG00000032221	17427	Mns1	1.66624	3.98461e-111		ENSMUSG00000032226	72077	Gcnt3	1.13132	2.68041e-05
ENSMUSG00000058806	12817	Col13a1	1.67338	3.06481e-39		ENSMUSG00000035285	269854	Nat14	1.13151	0.00154112
ENSMUSG00000033847	232889	Pla2g4c	1.68214	9.3976e-12		ENSMUSG00000026343	71111	Gpr39	1.13191	0.0225067
ENSMUSG00000078949	100043899	R3hdml	1.68657	1.34053e-09		ENSMUSG00000054509	328417	Parp4	1.13193	3.4449e-30
ENSMUSG00000029322	231507	Plac8	1.6901	6.55669e-37		ENSMUSG00000062444	11775	Ap3b2	1.13203	6.94721e-15
ENSMUSG00000085757	75545	1700019B21Rik	1.69592	0.00642045		ENSMUSG00000097712	100038353	Gm10532	1.13208	0.00388183
ENSMUSG00000047261	14432	Gap43	1.69778	8.55132e-59		ENSMUSG00000033955	228140	Tnks1bp1	1.13249	3.88696e-30
ENSMUSG00000026976	18510	Pax8	1.69812	2.08992e-13		ENSMUSG00000086391	73321	1700042O10Rik	1.13305	0.00995139
ENSMUSG00000031727	56523	Pmfbp1	1.70524	0.0013088		ENSMUSG00000027716	22065	Trpc3	1.13472	0.0170267
ENSMUSG00000031595	68797	Pdgfrl	1.70945	9.5322e-17		ENSMUSG00000033276	269209	Stk36	1.13473	1.51682e-20
ENSMUSG00000056133	667055	Gm9992	1.71407	0.00414069		ENSMUSG00000039728	104245	Slc6a5	1.13692	0.0201257
ENSMUSG00000025196	93721	Cpn1	1.71788	5.02209e-54		ENSMUSG00000041203	68544	Trir	1.13765	3.38965e-147
ENSMUSG00000086968	329735	4933431E20Rik	1.72302	2.90006e-18		ENSMUSG00000032221	17427	Mns1	1.13792	3.93055e-51
ENSMUSG00000033255	333669	Gm5134	1.72553	6.14956e-21		ENSMUSG00000043085	213989	Tmem82	1.13816	1.44713e-18
ENSMUSG00000036912	330890	Piwil4	1.72767	4.79785e-32		ENSMUSG00000034842	109979	Art3	1.13867	0.00485974
ENSMUSG00000029423	57749	Piwil1	1.73001	6.62978e-14		ENSMUSG00000038576	96935	Susd4	1.13877	4.08865e-21
ENSMUSG00000006056	76815	Calcoco2	1.73423	6.60637e-82		ENSMUSG00000031540	244349	Kat6a	1.13967	3.20255e-47
ENSMUSG00000071553	232680	Cpa2	1.73524	3.82498e-10		ENSMUSG00000042428	17309	Mgat3	1.13973	1.35449e-78
ENSMUSG00000033227	22420	Wnt6	1.73741	9.87418e-28		ENSMUSG00000005892	22044	Trh	1.14032	7.37464e-88
ENSMUSG00000031548	20377	Sfrp1	1.74037	0		ENSMUSG00000034765	240672	Dusp5	1.14061	1.44541e-52
ENSMUSG00000005611	17540	Mrvi1	1.74485	0.0200039		ENSMUSG00000091387	218476	Gcnt4	1.14164	0.000111404
ENSMUSG00000032011	21838	Thy1	1.75193	5.86884e-67		ENSMUSG00000008398	13713	Elk3	1.14226	5.02916e-54
ENSMUSG00000025932	14048	Eya1	1.7628	4.11388e-35		ENSMUSG00000079260	100504715	Tmppe	1.14335	8.2611e-77
ENSMUSG00000031509	76413	1700016D06Rik	1.76844	3.06675e-05		ENSMUSG00000000486	54204	2025-09-01	1.14337	1.82604e-253
ENSMUSG00000041872	257630	Il17f	1.77035	0.000465878		ENSMUSG00000029727	13113	Cyp3a13	1.14395	0.0263893
ENSMUSG00000026347	72160	Tmem163	1.77049	0.000184466		ENSMUSG00000025586	12877	Cpeb1	1.14433	2.29246e-18
ENSMUSG00000046152	171167	Fut10	1.77181	7.40965e-65		ENSMUSG00000039096	237926	Rsad1	1.14458	2.2153e-13
ENSMUSG00000022440	72709	C1qtnf6	1.77651	2.20542e-09		ENSMUSG00000033595	213469	Lgi3	1.14495	0.000939928
ENSMUSG00000031734	16373	Irx3	1.78399	2.79519e-07		ENSMUSG00000039357	73068	Fut11	1.14527	3.52549e-18
ENSMUSG00000004032	14866	Gstm5	1.79229	1.10438e-44		ENSMUSG00000033860	99571	Fgg	1.14532	0.00220166
ENSMUSG00000042757	81907	Tmem108	1.79353	4.16813e-24		ENSMUSG00000033159	69171	Cnppd1	1.14601	1.57084e-72
ENSMUSG00000024842	73660	Cabp4	1.81509	5.26167e-05		ENSMUSG00000037353	68614	Letmd1	1.14874	2.93537e-17
ENSMUSG00000046623	14621	Gjb4	1.81684	1.34566e-15		ENSMUSG00000041309	14912	Nkx6-2	1.14913	1.92533e-29
ENSMUSG00000035557	16667	Krt17	1.81905	7.59363e-90		ENSMUSG00000053226	23863	Dand5	1.15002	2.40638e-06
ENSMUSG00000055471	11682	Alk	1.82296	1.32526e-07		ENSMUSG00000000530	11482	Acvrl1	1.15011	1.40415e-12
ENSMUSG00000030109	14411	Slc6a12	1.82398	0.00954073		ENSMUSG00000052942	226075	Glis3	1.15248	6.05019e-08
ENSMUSG00000050914	654824	Ankrd37	1.83024	1.83247e-17		ENSMUSG00000005973	19672	Rcn1	1.15368	2.04763e-207
ENSMUSG00000014164	100503085	Klhl3	1.83264	2.47825e-11		ENSMUSG00000106951	319982	5930430L01Rik	1.15505	0.0146995
ENSMUSG00000025519	74419	Tktl2	1.83442	5.2166e-05		ENSMUSG00000026576	11931	Atp1b1	1.156	8.20951e-185
ENSMUSG00000045259	68874	Klhdc9	1.83508	1.27553e-06		ENSMUSG00000022223	654795	Sdr39u1	1.15639	2.50215e-26
ENSMUSG00000037035	16324	Inhbb	1.83849	0		ENSMUSG00000042854	76367	Trp53rkb	1.15712	2.19381e-15
ENSMUSG00000018008	72318	Cyth4	1.83933	9.62469e-13		ENSMUSG00000022900	106347	Ildr1	1.1577	1.19867e-89
ENSMUSG00000040483	327959	Xaf1	1.84486	7.65258e-65		ENSMUSG00000027775	66868	Mfsd1	1.15896	2.91528e-185
ENSMUSG00000071192	215001	Wfikkn1	1.84598	0.00149842		ENSMUSG00000020182	13195	Ddc	1.15899	1.79534e-32
ENSMUSG00000060715	69397	1700019A02Rik	1.85349	6.65677e-13		ENSMUSG00000085227	69004	6330418K02Rik	1.1601	0.00071454
ENSMUSG00000086391	73321	1700042O10Rik	1.8543	9.2362e-05		ENSMUSG00000009628	104271	Tex15	1.16038	1.31969e-54
ENSMUSG00000097262	71082	4933416M07Rik	1.85686	1.18655e-06		ENSMUSG00000038506	102323	Dcun1d2	1.16136	1.13112e-59
ENSMUSG00000030263	16970	Lrmp	1.86135	4.50676e-69		ENSMUSG00000095687	100037283	Rnaset2a	1.16166	4.10957e-23
ENSMUSG00000020875	15417	Hoxb9	1.87204	3.32235e-11		ENSMUSG00000058806	12817	Col13a1	1.16167	3.01946e-19
ENSMUSG00000053297	243373	AI854703	1.88676	1.16473e-20		ENSMUSG00000029821	54722	Dfna5	1.16193	0.000188267
ENSMUSG00000050197	73614	Rhox13	1.90353	6.34658e-35		ENSMUSG00000058833	66462	2810428I15Rik	1.16745	1.37251e-86
ENSMUSG00000020704	11418	Asic2	1.90764	0.00603968		ENSMUSG00000047735	209086	Samd9l	1.16844	2.90123e-06
ENSMUSG00000039728	104245	Slc6a5	1.90925	0.00052548		ENSMUSG00000022237	67434	Ankrd33b	1.1685	1.89236e-81
ENSMUSG00000071540	100504518	3425401B19Rik	1.90938	0.00249181		ENSMUSG00000021900	26363	Btd	1.16851	1.81711e-20
ENSMUSG00000038026	16524	Kcnj9	1.91205	6.64083e-05		ENSMUSG00000039209	68172	Rpl39l	1.1697	8.90075e-79
ENSMUSG00000026167	22409	Wnt10a	1.91445	1.97908e-06		ENSMUSG00000079484	227696	Phyhd1	1.17019	1.23884e-06
ENSMUSG00000035699	106407	Slc51a	1.9172	8.20895e-10		ENSMUSG00000062590	78795	Armc9	1.17132	2.80167e-52
ENSMUSG00000055866	18627	Per2	1.93023	3.8364e-16		ENSMUSG00000024565	20689	Sall3	1.17211	2.69169e-33
ENSMUSG00000021414	71864	Fam217a	1.94147	0.00560278		ENSMUSG00000045106	211936	Ccdc73	1.17347	4.84373e-11
ENSMUSG00000023036	93707	Pcdhgc4	1.94573	0.000325887		ENSMUSG00000067276	12338	Capn6	1.17443	0.000205077
ENSMUSG00000043681	69134	Fam25c	1.94813	1.22282e-47		ENSMUSG00000044626	239759	Liph	1.1747	5.20109e-55
ENSMUSG00000025969	18187	Nrp2	1.94978	1.02501e-143		ENSMUSG00000054046	626834	Klk13	1.17507	5.40354e-08
ENSMUSG00000033220	19354	Rac2	1.9614	1.75669e-05		ENSMUSG00000044148	69155	1810030O07Rik	1.17616	7.80553e-124
ENSMUSG00000026418	21952	Tnni1	1.96864	0.000572134		ENSMUSG00000068245	219132	Phf11d	1.17631	2.61363e-106
ENSMUSG00000043496	66873	Tril	1.97625	9.91614e-20		ENSMUSG00000038143	71069	Stox2	1.17651	9.56115e-58
ENSMUSG00000039545	78185	Flicr	1.97732	1.14198e-09		ENSMUSG00000038936	109232	Sccpdh	1.17673	1.17239e-53
ENSMUSG00000026630	381319	Batf3	1.98482	8.88524e-07		ENSMUSG00000013158	71046	4933405L10Rik	1.17737	0.0107655
ENSMUSG00000032611	112418	1700102P08Rik	1.99218	3.50056e-09		ENSMUSG00000020086	404634	H2afy2	1.17809	1.05505e-93
ENSMUSG00000024008	240058	Cpne5	1.99757	2.53734e-188		ENSMUSG00000031504	19332	Rab20	1.1785	1.97077e-05
ENSMUSG00000094796	625360	BC147527	2.02331	1.8848e-05		ENSMUSG00000027316	14588	Gfra4	1.17855	1.25397e-09
ENSMUSG00000037833	328381	Sh2d4b	2.02681	8.75072e-13		ENSMUSG00000074890	329504	Lcmt2	1.179	6.74941e-14
ENSMUSG00000072295	73463	C2cd6	2.04237	0.00614774		ENSMUSG00000033770	12733	Clcnka	1.17937	8.9335e-05
ENSMUSG00000075571	73670	Defb30	2.04685	0.000854549		ENSMUSG00000026452	20980	Syt2	1.17942	0.00733761
ENSMUSG00000073779	619295	Lrp8os2	2.04706	7.56929e-34		ENSMUSG00000066233	66079	Tmem42	1.17997	3.41942e-06
ENSMUSG00000031981	73647	Capn9	2.05346	0.00849992		ENSMUSG00000031077	14082	Fadd	1.18182	1.32287e-22
ENSMUSG00000020182	13195	Ddc	2.05779	1.10984e-104		ENSMUSG00000029603	14357	Dtx1	1.18221	1.46679e-73
ENSMUSG00000073408	268949	Dpcr1	2.06281	3.34212e-07		ENSMUSG00000046133	242574	C130073F10Rik	1.18225	4.31775e-06
ENSMUSG00000054057	77940	A930004D18Rik	2.06988	3.37746e-26		ENSMUSG00000037085	68260	Trmt12	1.18335	1.3575e-14
ENSMUSG00000035606	16716	Ky	2.07787	6.87309e-15		ENSMUSG00000025194	12780	Abcc2	1.1835	1.97771e-05
ENSMUSG00000030693	69540	Klk10	2.07947	1.50144e-25		ENSMUSG00000022711	54128	Pmm2	1.18388	3.27136e-60
ENSMUSG00000020481	76389	Ankrd36	2.08369	0.000868716		ENSMUSG00000041737	235135	Tmem45b	1.1855	4.67408e-05
ENSMUSG00000026463	381290	Atp2b4	2.10161	4.94611e-81		ENSMUSG00000024274	328918	Zscan30	1.18732	0.00693698
ENSMUSG00000005503	14028	Evx1	2.11471	0.00118604		ENSMUSG00000096847	210573	Tmem151b	1.18746	6.31601e-32
ENSMUSG00000047735	209086	Samd9l	2.11654	1.43066e-17		ENSMUSG00000011096	67605	Akt1s1	1.18832	8.26324e-130
ENSMUSG00000045246	66733	Kcng4	2.11742	4.76976e-10		ENSMUSG00000000605	12727	Clcn4	1.18936	3.53625e-26
ENSMUSG00000070304	72821	Scn2b	2.12149	1.18361e-26		ENSMUSG00000067702	22144	Tuba3a	1.18943	4.88945e-51
ENSMUSG00000087480	100504616	Gm15910	2.1323	1.39599e-07		ENSMUSG00000038195	280408	Rilp	1.19003	0.0225067
ENSMUSG00000074783	767814	AU019990	2.14247	0.00682097		ENSMUSG00000068267	12616	Cenpb	1.19007	4.25709e-146
ENSMUSG00000050435	237009	Ube2dnl1	2.1455	2.33432e-05		ENSMUSG00000040592	15985	Cd79b	1.19111	3.61948e-05
ENSMUSG00000048251	58208	Bcl11b	2.14623	2.7025e-23		ENSMUSG00000042784	17829	Muc1	1.19403	7.23826e-11
ENSMUSG00000085338	69739	2410004I01Rik	2.15784	0.000218766		ENSMUSG00000049721	53897	Gal3st1	1.19479	3.58032e-05
ENSMUSG00000031688	18997	Pou4f2	2.18486	6.35474e-62		ENSMUSG00000031557	83436	Plekha2	1.19547	6.07446e-56
ENSMUSG00000024349	72512	Tmem173	2.19201	2.25792e-09		ENSMUSG00000025213	107250	Kazald1	1.19565	0.00228892
ENSMUSG00000024420	225207	Zfp521	2.19282	4.1131e-19		ENSMUSG00000059363	14297	Fxn	1.19586	5.87191e-36
ENSMUSG00000026029	12370	Casp8	2.20082	1.17989e-26		ENSMUSG00000031478	23954	Nek3	1.19589	4.83547e-35
ENSMUSG00000053909	434769	Rhox10	2.20577	1.41215e-09		ENSMUSG00000021939	13030	Ctsb	1.1963	8.46799e-233
ENSMUSG00000022245	207667	Skor1	2.21428	3.17947e-08		ENSMUSG00000039601	53901	Rcan2	1.19735	1.6257e-13
ENSMUSG00000048827	244646	Pkd1l3	2.22304	2.90518e-05		ENSMUSG00000038497	234076	Tmco3	1.19787	9.2623e-48
ENSMUSG00000047495	244310	Dlgap2	2.2231	0.000981198		ENSMUSG00000036155	107895	Mgat5	1.1989	6.24012e-47
ENSMUSG00000055003	211187	Lrtm2	2.22554	3.22717e-07		ENSMUSG00000034266	53314	Batf	1.19905	0.00719831
ENSMUSG00000020419	75828	Hormad2	2.24989	7.83792e-61		ENSMUSG00000034488	13612	Edil3	1.19907	0.00917696
ENSMUSG00000045662	66715	Henmt1	2.25086	0.000189562		ENSMUSG00000000037	107815	Scml2	1.20265	2.2338e-16
ENSMUSG00000048070	193003	Pirt	2.25517	8.1938e-37		ENSMUSG00000042190	14747	Cmklr1	1.20293	6.61794e-52
ENSMUSG00000027794	74434	Sohlh2	2.25732	3.91335e-261		ENSMUSG00000021709	59079	Erbin	1.2033	5.01352e-96
ENSMUSG00000000184	12444	Ccnd2	2.25785	1.58936e-189		ENSMUSG00000070939	73122	Tgfbrap1	1.2041	7.66798e-60
ENSMUSG00000068327	21909	Tlx2	2.28103	0.000432497		ENSMUSG00000025083	226250	Afap1l2	1.20511	5.84749e-10
ENSMUSG00000020061	109272	Mybpc1	2.31106	3.38074e-08		ENSMUSG00000037217	20964	Syn1	1.20538	1.06441e-64
ENSMUSG00000031760	17751	Mt3	2.32725	1.3792e-32		ENSMUSG00000031824	234797	6430548M08Rik	1.20674	6.59566e-05
ENSMUSG00000035407	242553	Kank4	2.33556	1.38316e-214		ENSMUSG00000086796	73326	4932702P03Rik	1.20702	0.0205294
ENSMUSG00000031893	72236	Tsnaxip1	2.3468	0.000107375		ENSMUSG00000070583	14349	Fv1	1.20782	1.65006e-09
ENSMUSG00000064246	12654	Chil1	2.36035	6.51656e-05		ENSMUSG00000026605	108000	Cenpf	1.20785	3.58597e-210
ENSMUSG00000007122	12372	Casq1	2.36974	1.06492e-51		ENSMUSG00000045826	19265	Ptprcap	1.20804	0.0278348
ENSMUSG00000022548	11815	Apod	2.37577	6.71904e-52		ENSMUSG00000086494	70138	2210417A02Rik	1.20806	0.0163734
ENSMUSG00000050105	72690	Grrp1	2.38448	3.31482e-30		ENSMUSG00000046841	216197	Ckap4	1.20876	2.41533e-264
ENSMUSG00000064215	52668	Ifi27	2.38546	0.00648708		ENSMUSG00000101009	73272	1700108F19Rik	1.20896	6.28132e-05
ENSMUSG00000068323	232156	Slc4a5	2.39706	2.95008e-143		ENSMUSG00000039106	15563	Htr5a	1.21124	0.028732
ENSMUSG00000062007	209488	Hsh2d	2.41705	0.00115188		ENSMUSG00000071724	100503915	Smpd5	1.21307	0.00341645
ENSMUSG00000097352	606736	C920009B18Rik	2.43433	2.81124e-07		ENSMUSG00000026198	74104	Abcb6	1.21436	2.09202e-24
ENSMUSG00000055322	21961	Tns1	2.43547	6.07439e-288		ENSMUSG00000033313	50788	Fbxl8	1.21477	2.86802e-07
ENSMUSG00000032517	17433	Mobp	2.43952	2.41962e-30		ENSMUSG00000031143	54638	Ccdc22	1.21491	4.0434e-18
ENSMUSG00000022877	94175	Hrg	2.45112	0.00838925		ENSMUSG00000026466	208263	Tor1aip1	1.21581	2.01215e-58
ENSMUSG00000073538	626058	E330020D12Rik	2.46369	8.1328e-20		ENSMUSG00000025810	18186	Nrp1	1.21605	6.30951e-06
ENSMUSG00000044177	278507	Wfikkn2	2.46527	9.9112e-09		ENSMUSG00000044528	229801	Tram1l1	1.21847	1.93324e-07
ENSMUSG00000025934	14859	Gsta3	2.46742	8.23075e-55		ENSMUSG00000052852	52250	Reep1	1.21857	1.9852e-28
ENSMUSG00000092837	85029	Rpph1	2.51664	3.13453e-22		ENSMUSG00000076441	11898	Ass1	1.21963	0
ENSMUSG00000097893	73331	1700034P13Rik	2.5317	2.07282e-05		ENSMUSG00000046876	20238	Atxn1	1.22093	8.67167e-07
ENSMUSG00000101634	73426	1700066B17Rik	2.55239	9.64847e-05		ENSMUSG00000014303	83396	Glis2	1.22094	1.37135e-113
ENSMUSG00000053214	100502829	Gm9899	2.55459	1.43345e-05		ENSMUSG00000036256	29817	Igfbp7	1.22189	5.78395e-11
ENSMUSG00000020017	15109	Hal	2.55848	5.58292e-59		ENSMUSG00000024900	12894	Cpt1a	1.22195	2.99764e-200
ENSMUSG00000021359	21418	Tfap2a	2.56223	4.91104e-22		ENSMUSG00000025735	214951	Rhbdl1	1.22254	0.00145036
ENSMUSG00000059854	244653	Hydin	2.58981	4.16339e-96		ENSMUSG00000032360	387285	Hcrtr2	1.22329	0.0224471
ENSMUSG00000097281	102635083	Gm26685	2.59142	9.25899e-06		ENSMUSG00000026563	27878	Tada1	1.22476	1.66088e-41
ENSMUSG00000031809	76405	1700018B08Rik	2.5972	2.29412e-07		ENSMUSG00000092284	667766	Gm8801	1.22517	0.0307059
ENSMUSG00000079164	53791	Tlr5	2.60693	1.88757e-07		ENSMUSG00000037503	214469	Fam168b	1.22549	1.97165e-281
ENSMUSG00000030108	14412	Slc6a13	2.66969	0.000376385		ENSMUSG00000004207	19156	Psap	1.22697	1.65271e-254
ENSMUSG00000031070	211577	Mrgprf	2.67064	7.55842e-05		ENSMUSG00000026885	74410	Ttll11	1.22718	0.00695527
ENSMUSG00000039138	68175	4930591A17Rik	2.67885	1.25853e-08		ENSMUSG00000063672	74561	Nkx6-3	1.22733	2.03886e-35
ENSMUSG00000007107	27222	Atp1a4	2.72937	2.00394e-20		ENSMUSG00000074071	434197	Fam169b	1.22764	7.91347e-21
ENSMUSG00000035849	268481	Krt222	2.73586	9.55546e-07		ENSMUSG00000028962	20535	Slc4a2	1.22827	7.40882e-86
ENSMUSG00000040963	11890	Asgr2	2.77667	2.97572e-18		ENSMUSG00000104063	93704	Pcdhgb7	1.22838	1.11408e-07
ENSMUSG00000026450	71884	Chit1	2.78655	0.00482697		ENSMUSG00000039043	70420	Arpin	1.2292	7.58501e-23
ENSMUSG00000100837	78500	1700063D05Rik	2.78845	0.00428406		ENSMUSG00000067724	231044	Gbx1	1.2295	2.48919e-09
ENSMUSG00000004099	13433	Dnmt1	2.79445	0		ENSMUSG00000044231	105193	Nhlrc1	1.22958	6.1031e-13
ENSMUSG00000024863	17195	Mbl2	2.8423	0.00547591		ENSMUSG00000035228	232821	Ccdc106	1.23078	2.6512e-13
ENSMUSG00000012428	117167	Steap4	2.8914	0.000198732		ENSMUSG00000015942	114674	Gtf2ird2	1.23114	5.70842e-18
ENSMUSG00000070837	20871	Aurkc	2.91194	2.45396e-30		ENSMUSG00000047067	67446	Dusp28	1.23117	2.38124e-17
ENSMUSG00000034212	241158	Ankmy1	2.93861	1.76684e-08		ENSMUSG00000053702	74103	Nebl	1.2314	0.00540109
ENSMUSG00000024471	58916	Myot	2.94593	9.79774e-14		ENSMUSG00000026380	81879	Tfcp2l1	1.23244	0
ENSMUSG00000003657	12308	Calb2	2.96792	6.85302e-33		ENSMUSG00000098923	226351	Tmem185b	1.23346	1.2171e-31
ENSMUSG00000054763	619548	Defb42	2.96815	7.90605e-05		ENSMUSG00000033209	209683	Ttc28	1.23436	6.55089e-33
ENSMUSG00000066652	320202	Lefty2	3.01718	8.1886e-280		ENSMUSG00000033585	17984	Ndn	1.23511	1.71727e-27
ENSMUSG00000085708	330183	Gm16063	3.09266	1.20841e-09		ENSMUSG00000034825	78593	Nrip3	1.23725	4.84354e-10
ENSMUSG00000031932	14608	Gpr83	3.13075	5.09061e-17		ENSMUSG00000078776	319482	9530053A07Rik	1.23812	1.26571e-14
ENSMUSG00000032769	277328	Trpa1	3.16353	2.69965e-51		ENSMUSG00000048070	193003	Pirt	1.23814	1.1902e-11
ENSMUSG00000021624	17079	Cd180	3.17106	0.00328633		ENSMUSG00000044026	240660	Slc35g1	1.2383	1.75187e-83
ENSMUSG00000067768	27083	Xlr4b	3.21413	0.00155677		ENSMUSG00000020911	16669	Krt19	1.23967	1.04441e-20
ENSMUSG00000032207	15450	Lipc	3.30358	5.28772e-14		ENSMUSG00000042567	674895	Nek10	1.24023	0.000826989
ENSMUSG00000073568	381142	Arl14epl	3.48454	1.60254e-200		ENSMUSG00000032999	97895	Nlrp4f	1.24028	1.30766e-44
ENSMUSG00000025930	17681	Msc	3.56164	6.16773e-226		ENSMUSG00000045631	75002	Tmprss12	1.2407	2.56977e-05
ENSMUSG00000049044	56508	Rapgef4	3.74454	5.78739e-68		ENSMUSG00000042757	81907	Tmem108	1.24094	4.60497e-12
ENSMUSG00000022148	23880	Fyb	3.75839	8.3111e-08		ENSMUSG00000019810	66848	Fuca2	1.24189	4.00307e-56
ENSMUSG00000028492	75811	Saxo1	3.79232	0.000716141		ENSMUSG00000097023	101694	Mir9-3hg	1.24239	4.64096e-12
ENSMUSG00000097424	72259	1700030M09Rik	3.92465	0.000137562		ENSMUSG00000037475	331401	Thoc2	1.24267	1.02378e-280
ENSMUSG00000004231	18504	Pax2	4.0598	2.10436e-15		ENSMUSG00000018800	217265	Abca5	1.24326	2.03854e-25
ENSMUSG00000026301	74918	Iqca	4.08126	0.000614357		ENSMUSG00000053214	100502829	Gm9899	1.24482	0.01491
ENSMUSG00000057836	22445	Xlr3a	4.14938	3.34639e-36		ENSMUSG00000022912	19128	Pros1	1.24537	3.23525e-162
ENSMUSG00000033007	241118	Asic4	4.16843	5.73073e-05		ENSMUSG00000044976	546144	Wdr72	1.24649	0.0150214
ENSMUSG00000067299	12967	Crygd	4.20124	0.000497633		ENSMUSG00000067081	208372	Asb18	1.24694	0.0163117
ENSMUSG00000028217	12557	Cdh17	4.22504	0.000892471		ENSMUSG00000027966	12814	Col11a1	1.24745	1.17083e-29
ENSMUSG00000085723	100504069	Gm15915	4.3306	3.3157e-21		ENSMUSG00000000631	360013	Myo18a	1.24746	4.41741e-270
ENSMUSG00000058328	574438	Xlr5a	4.4976	0.000243277		ENSMUSG00000081683	93897	Fzd10	1.24757	6.04422e-41
ENSMUSG00000108043	116811	Zim3	4.6276	5.19337e-05		ENSMUSG00000033420	69538	Antxr1	1.24868	8.23554e-11
ENSMUSG00000090191	320626	9230105E05Rik	4.90829	0.000233287		ENSMUSG00000033671	74081	Cep350	1.24922	8.94781e-89
ENSMUSG00000047344	236285	Lancl3	6.08905	1.72135e-52		ENSMUSG00000071369	26408	Map3k5	1.24935	1.87528e-48
ENSMUSG00000079845	434794	Xlr4a	6.22703	5.16783e-08		ENSMUSG00000036959	320376	Bcorl1	1.24963	1.75512e-43
ENSMUSG00000055748	74548	Gsdmc4	7.66808	6.84708e-44		ENSMUSG00000020160	17268	Meis1	1.25048	8.76027e-08
ENSMUSG00000005716	19293	Pvalb	8.15909	2.02697e-09		ENSMUSG00000042529	16515	Kcnj12	1.25059	3.28606e-17
						ENSMUSG00000097072	768252	Foxl2os	1.25103	0.00161608
						ENSMUSG00000003279	224997	Dlgap1	1.25436	3.21079e-08
						ENSMUSG00000047881	100532	Rell1	1.25493	3.19418e-95
						ENSMUSG00000032060	12955	Cryab	1.25496	8.2448e-26
						ENSMUSG00000053819	108058	Camk2d	1.25625	5.22542e-27
						ENSMUSG00000045374	192652	Wdr81	1.25674	2.73211e-105
						ENSMUSG00000039193	268973	Nlrc4	1.25711	2.22309e-09
						ENSMUSG00000070972	72429	Dnajc25	1.25808	1.93959e-23
						ENSMUSG00000034382	224833	AI661453	1.25816	2.76777e-51
						ENSMUSG00000003033	11767	Ap1m1	1.25876	3.40752e-150
						ENSMUSG00000051146	73047	Camk2n2	1.25957	5.28095e-13
						ENSMUSG00000031103	56501	Elf4	1.25989	2.09552e-32
						ENSMUSG00000074121	78405	Ntf5	1.26007	1.66991e-14
						ENSMUSG00000035459	192188	Stab2	1.26081	0.0103837
						ENSMUSG00000021938	66645	Pspc1	1.26151	6.35492e-132
						ENSMUSG00000028664	13844	Ephb2	1.26336	6.91591e-83
						ENSMUSG00000103567	93713	Pcdhga5	1.2648	4.51479e-05
						ENSMUSG00000052906	108159	Ubxn8	1.26486	5.80428e-49
						ENSMUSG00000004098	53867	Col5a3	1.26515	2.90057e-25
						ENSMUSG00000000759	259279	Tubgcp3	1.2676	2.2903e-123
						ENSMUSG00000030852	57752	Tacc2	1.26799	8.25401e-211
						ENSMUSG00000034957	12606	Cebpa	1.26818	1.19684e-10
						ENSMUSG00000008035	68041	Mid1ip1	1.26929	9.42688e-145
						ENSMUSG00000074466	545539	Gm15417	1.27223	4.43015e-05
						ENSMUSG00000009418	215690	Nav1	1.27249	7.10362e-134
						ENSMUSG00000038463	320078	Olfml2b	1.27349	3.33874e-08
						ENSMUSG00000030345	101320	Dyrk4	1.27407	0.000504556
						ENSMUSG00000002885	26364	Adgre5	1.27441	4.1252e-180
						ENSMUSG00000030315	232334	Vgll4	1.27469	4.751e-29
						ENSMUSG00000056222	20745	Spock1	1.27555	2.55925e-07
						ENSMUSG00000097893	73331	1700034P13Rik	1.27817	0.0136566
						ENSMUSG00000026131	13518	Dst	1.27827	4.35971e-40
						ENSMUSG00000103677	93712	Pcdhga4	1.27831	6.4696e-05
						ENSMUSG00000046556	79233	Zfp319	1.27863	8.64187e-46
						ENSMUSG00000001985	14807	Grik3	1.27981	1.74006e-51
						ENSMUSG00000063760	268291	Rnf217	1.28031	5.79756e-11
						ENSMUSG00000024924	22359	Vldlr	1.2815	2.67977e-39
						ENSMUSG00000031153	54645	Gripap1	1.28175	4.04226e-110
						ENSMUSG00000039337	70956	Tex19.2	1.28304	7.07938e-07
						ENSMUSG00000030137	53857	Tuba8	1.28352	0.00587854
						ENSMUSG00000023143	27426	Nagpa	1.28459	1.67805e-64
						ENSMUSG00000040209	170753	Zfp704	1.28618	7.1595e-124
						ENSMUSG00000026339	70829	Ccdc93	1.28644	1.536e-136
						ENSMUSG00000047361	381260	Gm973	1.28679	1.30734e-13
						ENSMUSG00000025226	68431	Fbxl15	1.28684	7.65796e-16
						ENSMUSG00000076430	210554	Hus1b	1.28684	0.000228189
						ENSMUSG00000102742	93723	Pcdhga11	1.28845	1.29778e-21
						ENSMUSG00000079363	17472	Gbp4	1.2886	0.00391549
						ENSMUSG00000018470	16499	Kcnab3	1.28942	1.7646e-16
						ENSMUSG00000026567	271639	Adcy10	1.29025	0.00644301
						ENSMUSG00000032549	270192	Rab6b	1.29186	7.64476e-56
						ENSMUSG00000056019	236193	Zfp709	1.29255	1.09209e-31
						ENSMUSG00000045314	78088	Sowahb	1.29302	1.9537e-35
						ENSMUSG00000026208	13346	Des	1.29529	2.91412e-90
						ENSMUSG00000098112	668218	Bin2	1.29618	1.81987e-95
						ENSMUSG00000031387	19703	Renbp	1.29742	8.56782e-160
						ENSMUSG00000038046	67390	Mrm3	1.29745	2.64992e-35
						ENSMUSG00000087149	634882	Itih5l-ps	1.29799	5.25267e-05
						ENSMUSG00000031561	23965	Tenm3	1.29807	8.45095e-121
						ENSMUSG00000020061	109272	Mybpc1	1.29907	0.00119667
						ENSMUSG00000006435	18011	Neurl1a	1.30263	2.42569e-78
						ENSMUSG00000020682	118453	Mmp28	1.30459	2.40148e-25
						ENSMUSG00000097073	320692	9430037G07Rik	1.30503	0.00302125
						ENSMUSG00000039911	74646	Spsb1	1.30596	2.01661e-45
						ENSMUSG00000032181	20255	Scg3	1.30705	0.000145802
						ENSMUSG00000052446	234413	Zfp961	1.30715	8.99518e-216
						ENSMUSG00000026564	240892	Dusp27	1.30742	4.2374e-133
						ENSMUSG00000021835	12159	Bmp4	1.30749	7.60781e-138
						ENSMUSG00000037469	101744	Acp7	1.30755	9.03112e-09
						ENSMUSG00000022120	72486	Rnf219	1.30837	1.32736e-46
						ENSMUSG00000027555	71934	Car13	1.31016	2.56456e-78
						ENSMUSG00000006056	76815	Calcoco2	1.31087	1.76874e-46
						ENSMUSG00000029843	243755	Slc13a4	1.31181	3.12364e-09
						ENSMUSG00000001995	244668	Sipa1l2	1.31332	2.02872e-192
						ENSMUSG00000031887	71609	Tradd	1.31413	3.04478e-31
						ENSMUSG00000040220	104346	Gas8	1.31464	1.58675e-44
						ENSMUSG00000045330	74437	4933402E13Rik	1.31496	1.2831e-24
						ENSMUSG00000037624	16526	Kcnk2	1.3151	0.000704954
						ENSMUSG00000039910	17684	Cited2	1.3153	2.58177e-154
						ENSMUSG00000021359	21418	Tfap2a	1.31682	9.05012e-07
						ENSMUSG00000025329	18599	Padi1	1.31765	0.0218976
						ENSMUSG00000020205	21664	Phlda1	1.31892	1.12595e-80
						ENSMUSG00000024485	240215	Slc4a9	1.3195	1.40425e-09
						ENSMUSG00000028412	100434	Slc44a1	1.3195	0
						ENSMUSG00000009900	22416	Wnt3a	1.32124	0.00065955
						ENSMUSG00000074818	100503041	Pdzd7	1.32229	5.26234e-11
						ENSMUSG00000037139	242702	Myom3	1.32313	1.94288e-07
						ENSMUSG00000050052	72148	Tdrp	1.32328	7.23481e-107
						ENSMUSG00000047821	94092	Trim16	1.32454	1.40605e-16
						ENSMUSG00000070304	72821	Scn2b	1.3254	5.15926e-11
						ENSMUSG00000002108	22259	Nr1h3	1.32796	1.25918e-05
						ENSMUSG00000097248	100040294	Gm2694	1.3283	6.58639e-16
						ENSMUSG00000048865	226652	Arhgap30	1.33035	5.24499e-54
						ENSMUSG00000022602	11838	Arc	1.33277	2.72611e-112
						ENSMUSG00000091071	69513	1700030C10Rik	1.33533	2.06233e-43
						ENSMUSG00000032285	58233	Dnaja4	1.33568	7.5286e-14
						ENSMUSG00000015243	11303	Abca1	1.33688	1.47498e-134
						ENSMUSG00000024313	17288	Mep1b	1.33721	8.07724e-20
						ENSMUSG00000059114	627607	Lrrc74a	1.33844	0.00960152
						ENSMUSG00000034471	140721	Caskin2	1.33891	9.22511e-87
						ENSMUSG00000024561	17190	Mbd1	1.33915	4.54884e-61
						ENSMUSG00000022180	50934	Slc7a8	1.33985	1.0898e-11
						ENSMUSG00000026072	16177	Il1r1	1.34276	5.69033e-06
						ENSMUSG00000046337	381337	Fam178b	1.34299	4.32309e-102
						ENSMUSG00000035458	21954	Tnni3	1.34299	3.30729e-21
						ENSMUSG00000052133	20357	Sema5b	1.34338	2.25859e-73
						ENSMUSG00000070524	435653	Fcrlb	1.34381	0.00698978
						ENSMUSG00000003575	382056	Crtc1	1.34625	5.23314e-64
						ENSMUSG00000039804	228869	Ncoa5	1.3463	1.98805e-131
						ENSMUSG00000041556	230904	Fbxo2	1.34687	8.9123e-84
						ENSMUSG00000105044	667213	Gm10416	1.34691	1.54614e-20
						ENSMUSG00000068373	241589	D430041D05Rik	1.34884	6.95455e-07
						ENSMUSG00000027797	13175	Dclk1	1.34934	0.000464241
						ENSMUSG00000073725	68421	Lmbrd1	1.35111	2.19058e-74
						ENSMUSG00000031765	17748	Mt1	1.35113	1.43162e-230
						ENSMUSG00000048330	320360	Ric3	1.35233	6.95061e-67
						ENSMUSG00000049922	228368	Slc35c1	1.35246	2.11272e-40
						ENSMUSG00000097694	619312	G730013B05Rik	1.35323	2.20245e-07
						ENSMUSG00000040254	108151	Sema3d	1.35535	0.00131915
						ENSMUSG00000030465	234353	Psd3	1.3557	1.3487e-13
						ENSMUSG00000036553	231147	Sh3tc1	1.35801	2.19174e-81
						ENSMUSG00000086968	329735	4933431E20Rik	1.35926	7.97156e-12
						ENSMUSG00000035969	100213	Rusc2	1.35995	1.86141e-75
						ENSMUSG00000005705	11604	Agrp	1.36112	0.012725
						ENSMUSG00000029658	381693	Wdr95	1.36145	0.00314181
						ENSMUSG00000006731	14421	B4galnt1	1.3665	1.83567e-40
						ENSMUSG00000006930	15114	Hap1	1.36786	8.00967e-240
						ENSMUSG00000033007	241118	Asic4	1.37036	0.0443086
						ENSMUSG00000001128	18636	Cfp	1.37174	6.88298e-24
						ENSMUSG00000021456	14120	Fbp2	1.37264	8.65758e-33
						ENSMUSG00000031823	102193	Zdhhc7	1.37429	1.77501e-83
						ENSMUSG00000031447	16783	Lamp1	1.3759	0
						ENSMUSG00000042367	14620	Gjb3	1.37611	7.09571e-222
						ENSMUSG00000022822	27416	Abcc5	1.37643	2.54059e-295
						ENSMUSG00000027712	11747	Anxa5	1.37878	9.23795e-65
						ENSMUSG00000068748	19283	Ptprz1	1.3797	3.66469e-09
						ENSMUSG00000027520	73884	Zdbf2	1.38035	1.12525e-32
						ENSMUSG00000022565	18810	Plec	1.38189	4.13549e-182
						ENSMUSG00000031737	54352	Irx5	1.3841	0.000349288
						ENSMUSG00000047787	396184	Flrt1	1.385	8.29516e-07
						ENSMUSG00000027210	17536	Meis2	1.38526	2.78921e-08
						ENSMUSG00000042473	245638	Tbc1d8b	1.3865	1.05075e-15
						ENSMUSG00000022505	13731	Emp2	1.38923	2.62506e-44
						ENSMUSG00000040710	20452	St8sia4	1.39022	0.0011878
						ENSMUSG00000024842	73660	Cabp4	1.39118	0.0014186
						ENSMUSG00000090035	14426	Galnt4	1.39147	1.0266e-22
						ENSMUSG00000029718	18542	Pcolce	1.39383	1.27825e-228
						ENSMUSG00000073411	14964	H2-D1	1.39581	2.71914e-88
						ENSMUSG00000005355	12365	Casp14	1.39737	4.49476e-06
						ENSMUSG00000026959	14810	Grin1	1.39919	1.51889e-11
						ENSMUSG00000052135	329934	Foxo6	1.39941	1.4997e-27
						ENSMUSG00000016626	76858	Nlrp14	1.39994	2.47711e-12
						ENSMUSG00000015354	76477	Pcolce2	1.40356	2.08022e-102
						ENSMUSG00000040713	433375	Creg1	1.40517	1.70348e-53
						ENSMUSG00000038633	13244	Degs1	1.4054	1.48723e-229
						ENSMUSG00000019842	103213	Traf3ip2	1.40779	2.36552e-58
						ENSMUSG00000003812	13423	Dnase2a	1.40934	5.60212e-99
						ENSMUSG00000005501	227334	Usp40	1.40968	2.01102e-89
						ENSMUSG00000026656	14130	Fcgr2b	1.4116	8.07851e-22
						ENSMUSG00000031760	17751	Mt3	1.41227	1.45071e-12
						ENSMUSG00000074625	545481	Arhgap40	1.41525	0.00818592
						ENSMUSG00000083307	245350	AA414768	1.41541	1.15465e-22
						ENSMUSG00000026980	17076	Ly75	1.41768	5.2957e-246
						ENSMUSG00000043943	72560	Naalad2	1.41816	0.00548278
						ENSMUSG00000055866	18627	Per2	1.42219	2.38352e-09
						ENSMUSG00000047342	192651	Zfp286	1.4249	8.05966e-36
						ENSMUSG00000015745	67220	Plekho1	1.42519	6.03984e-16
						ENSMUSG00000066357	83669	Wdr6	1.42586	1.80563e-243
						ENSMUSG00000041540	20678	Sox5	1.42654	0.0139684
						ENSMUSG00000030703	68616	Gdpd3	1.42713	0.00534838
						ENSMUSG00000044835	73844	Ankrd45	1.42804	9.42165e-65
						ENSMUSG00000023966	75564	Rsph9	1.42916	0.0046875
						ENSMUSG00000021591	93692	Glrx	1.43093	9.06953e-36
						ENSMUSG00000058216	225884	Gstp3	1.43148	6.56441e-13
						ENSMUSG00000027581	20262	Stmn3	1.43197	1.17787e-54
						ENSMUSG00000028063	16905	Lmna	1.43378	1.98596e-190
						ENSMUSG00000071573	67795	Rnls	1.43553	9.53434e-06
						ENSMUSG00000098120	546100	Gm5914	1.43605	0.000713789
						ENSMUSG00000033419	20616	Snap91	1.43616	6.48401e-22
						ENSMUSG00000015812	14714	Gnrh1	1.43729	0.00653876
						ENSMUSG00000071604	381217	Fam189a2	1.43746	3.38982e-17
						ENSMUSG00000001095	20500	Slc13a2	1.43889	0.0159982
						ENSMUSG00000094910	268595	D430019H16Rik	1.44046	4.28697e-13
						ENSMUSG00000106847	353342	Peg13	1.44068	4.72584e-14
						ENSMUSG00000044734	66222	Serpinb1a	1.44091	1.31275e-08
						ENSMUSG00000025931	74229	Paqr8	1.44196	4.79643e-35
						ENSMUSG00000031537	16150	Ikbkb	1.44291	4.25715e-129
						ENSMUSG00000036006	193385	Ripor2	1.4435	0.0001662
						ENSMUSG00000022371	12818	Col14a1	1.44371	0.00708088
						ENSMUSG00000043342	15438	Hoxd9	1.44517	0.000279077
						ENSMUSG00000054716	244216	Zfp771	1.44543	1.66536e-69
						ENSMUSG00000073293	102954	Nudt10	1.4459	2.15439e-11
						ENSMUSG00000022297	14368	Fzd6	1.44643	7.63311e-29
						ENSMUSG00000021959	50523	Lats2	1.44807	9.94636e-30
						ENSMUSG00000068522	239435	Aard	1.44809	3.85696e-127
						ENSMUSG00000044461	219134	Shisa2	1.44907	2.94949e-63
						ENSMUSG00000004668	268379	Abca13	1.45089	2.31439e-06
						ENSMUSG00000036534	234595	Slc38a7	1.45112	5.65438e-177
						ENSMUSG00000049184	75029	Purg	1.45243	8.51953e-30
						ENSMUSG00000038598	100155	AI481877	1.45267	7.20033e-20
						ENSMUSG00000022103	14586	Gfra2	1.45369	0.000182061
						ENSMUSG00000024391	55938	Apom	1.45394	1.80502e-06
						ENSMUSG00000028028	71481	Alpk1	1.45473	0.0136465
						ENSMUSG00000044393	13511	Dsg2	1.4549	9.34293e-271
						ENSMUSG00000046070	16005	Igfals	1.45589	1.00811e-16
						ENSMUSG00000023170	56310	Gps2	1.45756	2.31556e-63
						ENSMUSG00000063919	68955	Srrm4	1.45791	2.48356e-08
						ENSMUSG00000027329	70997	Spef1	1.45841	5.6819e-15
						ENSMUSG00000042182	320705	Bend6	1.4598	8.33168e-22
						ENSMUSG00000078706	193022	Gm53	1.46029	8.96379e-43
						ENSMUSG00000032064	330938	Dixdc1	1.46041	2.99567e-99
						ENSMUSG00000070691	12399	Runx3	1.46164	1.04317e-15
						ENSMUSG00000035283	11554	Adrb1	1.4626	8.42326e-08
						ENSMUSG00000051373	227721	Plpp7	1.46269	5.31265e-09
						ENSMUSG00000000320	11684	Alox12	1.46372	8.6297e-23
						ENSMUSG00000051910	20679	Sox6	1.46608	9.57049e-07
						ENSMUSG00000030587	72275	2200002D01Rik	1.46769	2.87811e-17
						ENSMUSG00000047414	399558	Flrt2	1.46813	3.42236e-14
						ENSMUSG00000040612	100039795	Ildr2	1.46839	3.29238e-13
						ENSMUSG00000032589	12217	Bsn	1.46991	3.91086e-24
						ENSMUSG00000020121	117600	Srgap1	1.47261	1.69418e-57
						ENSMUSG00000070047	14107	Fat1	1.47312	7.31636e-59
						ENSMUSG00000052384	224109	Nrros	1.47385	3.02112e-17
						ENSMUSG00000031397	83553	Tktl1	1.47643	1.39335e-06
						ENSMUSG00000040187	272322	Arntl2	1.47686	9.30005e-18
						ENSMUSG00000047898	12773	Ccr4	1.47753	0.00177606
						ENSMUSG00000034584	320051	Exph5	1.47895	0.000512991
						ENSMUSG00000061520	110511	Olfr153	1.4801	0.0022142
						ENSMUSG00000034607	69693	Pof1b	1.48054	8.59035e-06
						ENSMUSG00000001027	110880	Scn4a	1.48159	0.0107705
						ENSMUSG00000004032	14866	Gstm5	1.48428	8.74498e-31
[truncated: 835 more rows]

## Sheet: Data S2
Data S2. Quantification of western blots using total protein normalization and the Image J software (related to Figures 1 and S1)
Sample	Ponceau S staining		Western blot
	Total protein		DNMT1					ACTB
	IntDen	Corr. IntDen	IntDen	Corr. IntDen	Norm. IntDen	Avg norm. IntDen	Fold change	IntDen	Corr. IntDen	Norm. IntDen	Avg norm. IntDen	Fold change
WT	1519623	-383165	1211284	-266996	0.696817	0.766218	NA	411215	-570947	1.49008	1.57819	NA
WT	1520276	-382512	1181565	-296715	0.775701			357681	-624481	1.63258
WT	1521154	-381634	1162999	-315281	0.826134			367006	-615156	1.6119
D1 t/t	1498108	-404680	586026	-892254	2.20484	2.27484	2.96893	378495	-603667	1.49171	1.51773	0.961693
D1 t/t	1549951	-352837	574171	-904109	2.5624			443635	-538527	1.52628
D1 t/t	1493419	-409369	636086	-842194	2.0573			353698	-628464	1.5352
D1 t/t +Dox	1487694	-415094	1450358	-27922	0.0672667	0.0224222	0.0292635	407084	-575078	1.38542	1.54947	0.981807
D1 t/t +Dox	1501428	-401360	1478280	0	0			338589	-643573	1.60348
D1 t/t +Dox	1487367	-415421	1478280	0	0			292760	-689402	1.65953
Background	1902788	0	1478280	0	NA	NA	NA	982162	0	NA	NA	NA
Sample	Ponceau S staining		Western blot
	Total protein		DNMT3A1					DNMT3A2
	IntDen	Corr. IntDen	IntDen	Corr. IntDen	Norm. IntDen	Avg norm. IntDen	Fold change	IntDen	Corr. IntDen	Norm. IntDen	Avg norm. IntDen	Fold change
WT	2652980	-737266	449727	-421271	0.571396	0.303318	NA	247469	-1504453	2.04058	2.03381	NA
WT	2667745	-722501	739787	-131211	0.181607			223234	-1528688	2.11583
WT	2646614	-743632	754284	-116714	0.156951			305542	-1446380	1.94502
D1 t/t	2652082	-738164	861837	-9161	0.0124105	0.00446338	0.0147152	1202108	-549814	0.74484	0.831948	0.409058
D1 t/t	2665503	-724743	870814	-184	0.000253883			1120169	-631753	0.871692
D1 t/t	2586914	-803332	870415	-583	0.000725727			1045544	-706378	0.87931
D1 t/t +Dox	2595553	-794693	870334	-664	0.000835543	0.000330259	0.00108882	1356083	-395839	0.498103	0.351982	0.173065
D1 t/t +Dox	2560246	-830000	870891	-107	0.000128916			1457047	-294875	0.355271
D1 t/t +Dox	2630285	-759961	870978	-20	2.63171e-05			1597975	-153947	0.202572
Background	3390246	0	870998	0	NA	NA	NA	1751922	0	NA	NA	NA
Sample	Ponceau S staining		Western blot
	Total protein		DNMT3B
	IntDen	Corr. IntDen	IntDen	Corr. IntDen	Norm. IntDen	Avg norm. IntDen	Fold change		WT : wild-type mESCs
WT	2319987	-701797	809880	-1304222	1.8584	1.82545	NA		D1 t/t : Dnmt1tet/tet mESCs
WT	2438221	-583563	1020631	-1093471	1.87378				D1 t/t +Dox : Doxycycline-treated Dnmt1tet/tet mESCs
WT	2411898	-609886	1050353	-1063749	1.74418				IntDen : integrated density measured with ImageJ
D1 t/t	2330442	-691342	1985450	-128652	0.18609	0.18438	0.101005		Corr. IntDen : corrected IntDen (sample IntDen minus background IntDen)
D1 t/t	2316284	-705500	1992751	-121351	0.172007				Norm. IntDen : normalized corr. IntDen (western blot corr. IntDen divided by total protein corr. IntDen)
D1 t/t	2365645	-656139	1986127	-127975	0.195043				Avg IntDen : average normalized corr. IntDen
D1 t/t +Dox	2348921	-672863	1977872	-136230	0.202463	0.319913	0.175251		Fold change : D1 t/t or D1t/t + Dox vs WT
D1 t/t +Dox	2428122	-593662	1977957	-136145	0.229331				NA : not applicable
D1 t/t +Dox	2353822	-667962	1761454	-352648	0.527946
Background	3021784	0	2114102	0	NA	NA	NA

## Sheet: Data S3
Data S3. Enrichment of KEGG pathways for Dnmt1tet/tet hypermethylated promoter DMRs (related to Figure 3)
Category	Subcategory	ID	Description	GeneRatio	BackgroundRatio	EnrichmentFactor	FoldEnrichment	zScore	p-value	Adjusted p-value	q-value	GeneID	Count
Organismal Systems	Development and regeneration	mmu04360	Axon guidance	72/1385	181/10650	0.39779	3.05882	10.8009	8.19822e-20	2.7628e-17	1.53609e-17	18007/19055/12323/93742/17974/107449/54712/243743/19247/12934/13640/19353/171171/13844/26413/18208/14677/19877/69632/11848/18021/18750/214968/20187/12632/237860/238057/16412/14678/13839/20360/170758/12325/20348/17295/19057/20350/108058/13638/22065/20354/20355/22418/22253/20130/58220/67938/67268/18803/56513/140570/11854/16653/226251/19206/107448/18707/50780/13846/18844/12168/117600/13841/56637/270…	72
Environmental Information Processing	Signal transduction	mmu04390	Hippo signaling pathway	61/1385	158/10650	0.386076	2.96874	9.63929	3.07361e-16	5.17903e-14	2.87948e-14	17126/50523/14371/12387/93742/93960/71228/22629/22422/54401/22411/21676/269643/232157/17131/12156/104318/12006/13383/22601/22631/14367/18759/105782/22412/216795/238057/17125/19047/434233/16897/93897/21812/22630/19045/12695/12161/319710/12445/22418/58220/56513/72293/56217/12385/27373/21415/13544/16475/12168/19052/17128/14369/16798/56637/21808/12166/14366/22417/20674/11789	61
Human Diseases	Cancer: overview	mmu05200	Pathways in cancer	139/1385	549/10650	0.253188	1.94689	8.80769	8.29554e-16	9.31866e-14	5.18107e-14	14183/13017/16001/56458/17126/12606/14707/12323/14371/12387/18712/14172/12448/20182/328572/56044/50868/16973/19211/18591/22422/18749/12395/26965/22411/19353/16450/17979/14701/12156/14683/26413/12006/14700/14677/19877/18798/16195/69632/19645/11848/13016/14174/14367/14682/12447/18750/14745/22412/216795/12125/17685/14706/16412/14678/20525/12576/15208/18805/26420/432530/170758/14255/19697/93897/11651…	139
Environmental Information Processing	Signal transduction	mmu04310	Wnt signaling pathway	64/1385	175/10650	0.365714	2.81217	9.3454	1.27171e-15	1.07142e-13	5.95697e-14	13017/13000/19055/12323/14371/12387/77583/328572/20377/93960/16973/22422/18749/407821/20437/26965/22411/19353/21885/26564/12006/18798/18018/11848/67087/13016/14367/18021/18750/20187/22412/216795/26420/170758/93897/12325/19057/18797/108058/12445/22418/226154/21886/72293/106042/75826/228770/68339/27373/21415/13544/54612/212398/17128/14296/14369/18163/27412/18747/56637/81004/14366/22417/11789	64
Cellular Processes	Cellular community - eukaryotes	mmu04550	Signaling pathways regulating pluripotency of stem cells	53/1385	140/10650	0.378571	2.91104	8.80011	7.19832e-14	4.85167e-12	2.69748e-12	14183/16001/19712/17126/14371/12387/76073/22422/20482/17129/22411/26413/12006/16880/16195/21423/11477/14367/12151/22412/216795/16600/17125/11906/51869/93897/11651/16452/22418/16653/11481/18707/13544/14173/16324/12168/23797/17128/15429/14369/11480/56637/16451/12166/14366/22417/20674/16392/84505/11789/13990/18706/14182	53
Cellular Processes	Cellular community - eukaryotes	mmu04520	Adherens junction	40/1385	92/10650	0.434783	3.34327	8.72736	4.4077e-13	2.47566e-11	1.37644e-11	16001/13000/83767/12387/93742/17356/108100/215449/328572/19271/19353/58235/26413/19877/66313/11848/170758/21872/21812/13866/17295/214137/67938/67268/109711/19263/12385/21415/22612/20411/17128/58998/245880/12540/14360/19268/75788/19274/73178/14182	40
Human Diseases	Cancer: specific types	mmu05224	Breast cancer	52/1385	147/10650	0.353741	2.72011	8.11921	2.75437e-12	1.32603e-10	7.37261e-11	16001/14371/12387/14172/16973/19211/22422/22411/16450/17979/26413/12006/19645/14174/14367/22412/216795/15208/216148/93897/11651/13866/18131/14180/271849/22418/13388/80857/20663/13982/16653/18707/21415/13544/14173/212398/23797/242705/17977/14296/14369/27412/72508/56637/18132/13557/14366/22417/16449/11789/18706/14182	52
Human Diseases	Cancer: specific types	mmu05226	Gastric cancer	52/1385	150/10650	0.346667	2.6657	7.94338	6.71797e-12	2.82994e-10	1.57342e-10	14183/17126/14371/12387/14172/12448/20182/16973/22422/22411/26413/12006/19645/14174/14367/12447/22412/216795/12576/216148/93897/11651/21812/13866/17295/21748/14180/271849/22418/80857/20663/16653/12385/18707/21415/13544/14173/212398/23797/17128/242705/14296/14369/27412/72508/56637/21808/13557/14366/22417/11789/18706	52
Human Diseases	Cancer: specific types	mmu05225	Hepatocellular carcinoma	56/1385	175/10650	0.32	2.46065	7.5326	3.99624e-11	1.41278e-09	7.85492e-10	16001/17126/14371/12387/93760/50868/16973/19211/22422/67155/26992/77044/22411/26413/12006/19645/14367/18750/22412/216795/68094/216148/93897/11651/21812/17295/21748/271849/22418/18803/29861/20663/66993/16653/232223/18707/21415/13544/20586/212398/23797/17128/242705/14296/14369/27412/72508/56637/21808/13557/14366/22417/239985/57376/11789/18706	56
Human Diseases	Cancer: overview	mmu05205	Proteoglycans in cancer	62/1385	204/10650	0.303922	2.33701	7.45474	4.19223e-11	1.41278e-09	7.85492e-10	16001/17126/19684/12323/14371/12387/232807/22422/18749/19247/22411/19353/20104/26413/19303/19877/69632/16147/11848/14367/17931/18750/22412/216795/16412/19047/434233/11733/93897/11651/12325/13866/17295/108058/19045/13869/22418/20130/18803/20663/13982/16653/19206/16402/18707/15442/14173/66922/23797/14369/22160/12512/18747/18569/72508/21808/12540/14366/22417/18706/21844/14182	62
Environmental Information Processing	Signal transduction	mmu04350	TGF-beta signaling pathway	41/1385	112/10650	0.366071	2.81492	7.46523	1.67172e-10	5.12154e-09	2.84752e-09	17126/18007/18121/328572/21781/20482/13559/17129/26965/17131/12156/26413/19877/66313/207596/11848/11477/380664/238057/17125/104394/15182/20185/21812/20481/12161/11481/68799/12667/228839/16324/12168/19052/17128/11480/72508/21808/12166/14118/75788/17130	41
Environmental Information Processing	Signaling molecules and interaction	mmu04517	IgSF CAM signaling	78/1385	300/10650	0.26	1.99928	6.78787	6.31797e-10	1.66069e-08	9.23329e-09	56458/19684/19280/11845/14924/13823/12387/93742/17356/108100/215449/268932/17974/225875/107449/233977/13822/74053/243743/19247/19353/110862/21873/58235/17475/26413/18208/76709/19303/11848/18759/19283/18750/16412/80297/12988/12927/26420/21872/11651/18187/68097/20740/22253/58220/67938/67268/18803/56513/109711/19266/18213/107448/16402/269116/18707/16180/20411/111173/77579/216856/13449/76089/18844/23…	78
Environmental Information Processing	Signal transduction	mmu04014	Ras signaling pathway	66/1385	237/10650	0.278481	2.14139	6.87031	6.40624e-10	1.66069e-08	9.23329e-09	14183/16001/11845/14707/17356/215449/14172/56044/18591/18749/19247/13640/56480/19353/14701/72399/26413/14700/11848/15566/19696/14174/18750/14706/216148/18805/26420/11352/170758/14255/16706/19697/11651/14688/17295/16150/14180/12313/333050/13638/12675/271849/19731/20130/80857/18803/20663/19419/16653/78405/18707/56784/14173/66922/23797/114713/271457/18747/19765/12540/14812/14389/56392/18706/21844/14…	66
Environmental Information Processing	Signal transduction	mmu04010	MAPK signaling pathway	77/1385	299/10650	0.257525	1.98025	6.64717	1.31159e-09	3.15719e-08	1.75536e-08	14183/16001/26921/19055/19043/16478/12286/215449/14172/240672/26398/18591/18749/26408/13640/19353/12289/14701/26413/18018/14174/17762/18021/18750/20111/26420/170758/14255/12298/19697/216869/11651/21812/235584/13866/65964/17295/19057/16150/14180/13869/13638/12675/12295/20130/14573/80857/20663/109689/26407/19419/16653/78405/110651/16180/14173/56808/68652/76089/66922/20807/19042/23797/114713/26401/1…	77
Human Diseases	Endocrine and metabolic disease	mmu04934	Cushing syndrome	50/1385	162/10650	0.308642	2.37331	6.80984	1.8114e-09	4.06961e-08	2.26266e-08	218461/12323/14371/12387/215449/12448/22422/18749/22411/18584/12289/109305/14683/26413/16526/12006/14677/18798/19645/14367/14682/12447/22412/216795/26423/14678/12576/432530/93897/12325/18797/108058/22418/16527/11632/21415/13544/11515/242705/14369/12288/18747/56637/12580/13557/14366/22417/11789/140858/11622	50
Organismal Systems	Nervous system	mmu04724	Glutamatergic synapse	40/1385	117/10650	0.34188	2.6289	6.84964	2.89109e-09	6.08935e-08	3.38561e-08	19055/14707/12286/224997/14660/110637/18749/67760/26557/12289/14701/14683/26413/14700/14677/18798/14682/18750/14706/14678/18805/432530/20511/58234/14688/19057/18797/216456/320129/72961/20510/243961/14823/26558/11515/14814/12288/18747/14812/170483	40
Organismal Systems	Nervous system	mmu04728	Dopaminergic synapse	44/1385	137/10650	0.321168	2.46963	6.69363	4.36491e-09	8.6528e-08	4.81086e-08	12753/19055/14707/12286/12323/26932/18749/12289/269643/14701/14683/14700/14677/18798/11865/14680/14682/18750/21770/14706/16572/19047/434233/14678/26420/235542/216869/11651/12325/14688/19057/18797/108058/19045/12313/109689/26931/23797/19052/12288/18747/56637/14812/12287	44
Genetic Information Processing	Chromosome	mmu03083	Polycomb repressive complex	33/1385	88/10650	0.375	2.88357	6.85974	5.00345e-09	9.36758e-08	5.20827e-08	103551/68837/328572/76073/21781/17425/11569/54650/252870/14123/14056/29871/319974/212391/12151/19763/15182/56550/216080/494448/14055/52615/12416/19821/225876/237339/22632/241915/245688/56353/30841/140858/13619	33
Organismal Systems	Endocrine system	mmu04919	Thyroid hormone signaling pathway	40/1385	120/10650	0.333333	2.56318	6.65796	6.65513e-09	1.18041e-07	6.56296e-08	329650/56458/76199/12387/20182/11928/328572/54720/11938/18749/17978/17979/26413/18798/18750/20525/18519/11651/15182/20185/18131/69790/12371/18797/18803/216154/13982/16653/14534/327987/18707/23797/17977/18747/56637/18132/19744/11933/22417/18706	40
Organismal Systems	Endocrine system	mmu04928	Parathyroid hormone synthesis, secretion and action	39/1385	116/10650	0.336207	2.58527	6.63732	7.8083e-09	1.3157e-07	7.31514e-08	16478/20182/16973/75607/18749/17258/232341/18227/14683/26413/14677/18798/11848/14682/12393/18750/14678/108737/23948/18805/432530/16591/216869/18797/18577/17387/13653/17261/16658/109689/19227/11515/53416/18747/19228/17388/238871/17391/14182	39
Environmental Information Processing	Signal transduction	mmu04150	mTOR signaling pathway	47/1385	158/10650	0.297468	2.28739	6.30328	2.04106e-08	3.27542e-07	1.8211e-07	16001/12283/14371/105787/29869/16973/19211/22422/22411/20104/54170/26413/11848/14367/18750/216742/252875/22412/216795/108079/109270/329679/20111/93897/11651/74370/16150/20869/12675/22418/20663/16653/110651/18707/13544/14783/23797/56430/14369/72508/56637/19744/14366/22417/13684/108664/18706	47
Environmental Information Processing	Signal transduction	mmu04015	Rap1 signaling pathway	58/1385	215/10650	0.269767	2.07439	6.15304	2.48489e-08	3.80639e-07	2.11631e-07	14183/16001/14924/12387/93742/17356/215449/14172/56044/18591/13640/19353/14683/26413/14677/18798/99470/11848/14174/14682/217692/18759/18750/14745/16412/14678/12801/12927/238130/432530/170758/11651/65086/17295/18797/14180/12313/13638/20130/58220/80857/18803/56513/18645/110351/16653/18707/14173/11515/76089/23797/18643/75292/12540/14812/18706/21844/14182	58
Cellular Processes	Cellular community - eukaryotes	mmu04530	Tight junction	49/1385	170/10650	0.288235	2.21639	6.18123	3.15048e-08	4.61613e-07	2.56652e-07	19684/14924/93742/17356/105787/18749/26408/83814/19353/12289/269643/21873/17475/76709/13383/19877/11848/18759/105782/434204/108079/16412/16897/218518/26420/21872/13866/15525/68178/20869/12695/58220/67938/67268/56513/12394/56217/109711/104027/16800/68188/77579/76089/19052/26401/54357/18747/12540/21844	49
Organismal Systems	Circulatory system	mmu04261	Adrenergic signaling in cardiomyocytes	46/1385	156/10650	0.294872	2.26743	6.16554	3.87955e-08	5.44753e-07	3.02877e-07	12323/67972/11928/26932/11938/18749/12289/269643/14683/26413/16526/14677/18798/11550/14682/18750/21770/19047/434233/14678/20266/432530/12298/235542/11651/12325/110893/18797/108058/19045/12313/12295/26931/16535/22003/11515/56808/23797/19052/12288/18747/17897/11933/12293/12300/12294	46
Cellular Processes	Transport and catabolism	mmu04140	Autophagy - animal	48/1385	167/10650	0.287425	2.21016	6.0942	4.79232e-08	6.44073e-07	3.58098e-07	16001/66615/15289/105787/29869/19211/18749/12211/56480/74781/54170/26413/70231/66734/12421/108079/207565/22186/13666/74302/26420/11651/54673/74370/20869/67474/71648/20130/213948/16653/52639/245860/18707/13143/66922/16783/23797/19052/18747/72508/19744/228361/67841/78610/78943/18706/97287/384783	48
Cellular Processes	Cell motility	mmu04810	Regulation of actin cytoskeleton	61/1385	235/10650	0.259574	1.99601	5.96929	5.08814e-08	6.44073e-07	3.58098e-07	14183/50884/19684/83767/108100/14172/232807/330662/18591/19353/18711/14701/108083/26413/76709/19303/19877/69632/11848/14174/17931/12632/192897/237860/14745/329165/16412/19047/434233/12927/170758/11651/14180/19045/104099/20130/67938/67268/80857/20663/18645/16653/109711/16402/12671/18707/14173/77579/66922/23797/18643/12540/16400/18719/73178/11789/18706/14061/14163/21844/14182	61
Organismal Systems	Endocrine system	mmu04916	Melanogenesis	34/1385	100/10650	0.34	2.61444	6.27123	5.16023e-08	6.44073e-07	3.58098e-07	50518/12323/14371/12387/328572/22422/18749/22411/14683/26413/14677/18798/14367/14682/18750/22412/216795/14678/432530/93897/12325/18797/108058/12313/22418/16653/21415/13544/11515/14369/18747/56637/14366/22417	34
Organismal Systems	Nervous system	mmu04725	Cholinergic synapse	37/1385	114/10650	0.324561	2.49572	6.20759	5.41242e-08	6.51423e-07	3.62184e-07	16520/14707/12286/12323/18749/110862/12289/14701/26413/14700/14677/18798/14682/18750/14706/14678/11441/432530/11651/12325/14688/18797/226922/108058/16452/60613/16653/16535/12671/18707/11515/23797/12288/18747/14360/18706/12287	37
Cellular Processes	Transport and catabolism	mmu04144	Endocytosis	67/1385	270/10650	0.248148	1.90814	5.84378	7.4869e-08	8.70029e-07	4.83727e-07	14183/16001/17126/11845/213990/216238/93742/347722/215280/70160/208092/83814/12343/232227/26431/98366/107568/19334/76709/20404/66313/11848/319277/100017/18759/212285/16572/72685/18805/70432/216869/21812/54673/11771/52348/19158/30930/72183/56324/11840/13858/320129/243621/211914/58220/56513/109689/11844/77407/13430/66251/330319/69710/19157/13855/75608/116733/271457/216439/211673/12540/194309/13429/…	67
Human Diseases	Drug resistance: antineoplastic	mmu01522	Endocrine resistance	32/1385	93/10650	0.344086	2.64586	6.1634	9.23351e-08	1.03723e-06	5.76689e-07	16001/18749/16450/17979/14683/26413/19645/59035/12576/216148/26420/432530/11651/20185/13866/18131/271849/13388/20663/13982/16653/18707/11515/23797/242705/18747/72508/18132/12580/13557/16449/18706	32
Human Diseases	Infectious disease: bacterial	mmu05135	Yersinia infection	41/1385	136/10650	0.301471	2.31817	5.98153	1.0784e-07	1.15864e-06	6.4419e-07	11845/108100/26398/330662/215280/56480/26431/19353/109333/26413/76709/19303/19877/18018/69632/11848/18021/14682/16412/12927/20111/26420/170758/19697/11651/16150/12675/18803/110651/330319/16402/18707/140579/68652/23797/56637/12540/18719/73178/18706/14131	41
Human Diseases	Neurodegenerative disease	mmu05017	Spinocerebellar ataxia	42/1385	141/10650	0.297872	2.2905	5.96407	1.10019e-07	1.15864e-06	6.4419e-07	12286/19699/29869/11938/13131/26408/22335/114896/74781/22359/56436/18798/80912/14682/18750/12421/20422/19883/26420/11651/19664/18797/22065/19181/80913/215999/52639/65115/18707/23797/16504/14814/26444/18044/228361/14812/11740/170483/71722/78943/18706/233871	42
Environmental Information Processing	Signal transduction	mmu04371	Apelin signaling pathway	41/1385	140/10650	0.292857	2.25193	5.76502	2.59332e-07	2.64833e-06	1.47244e-06	18181/17126/18576/14707/105787/18749/17258/14701/20104/26413/14700/14677/18798/66734/14682/20192/108079/14706/14678/432530/11651/21812/14688/18131/110893/18797/12313/20130/13653/17261/16653/11515/30878/208727/66922/23797/17128/18747/72508/17897/16449	41
Organismal Systems	Nervous system	mmu04722	Neurotrophin signaling pathway	37/1385	121/10650	0.305785	2.35134	5.77992	3.005e-07	2.97848e-06	1.65601e-06	12323/215449/72843/26408/19247/192656/19353/26413/11848/23921/192662/16923/20111/216148/26420/19697/11651/12325/16150/108058/12313/56484/271849/20399/18803/20663/16653/78405/110651/18213/18707/23797/26401/56637/20661/12540/18706	37
Human Diseases	Drug resistance: antineoplastic	mmu01521	EGFR tyrosine kinase inhibitor resistance	28/1385	80/10650	0.35	2.69134	5.87075	3.89526e-07	3.75058e-06	2.08528e-06	14183/16001/19211/18591/20104/26413/18750/12125/216148/11651/211323/13866/17295/56484/271849/16452/16194/18803/20663/16653/18707/14173/23797/72508/56637/16451/13684/18706	28
Organismal Systems	Nervous system	mmu04720	Long-term potentiation	25/1385	67/10650	0.373134	2.86923	5.93406	4.03635e-07	3.77847e-06	2.10079e-06	19055/12323/215449/328572/18749/26413/18798/14682/18750/19047/434233/20111/432530/12325/19057/18797/108058/19045/12313/16653/110651/14814/12288/18747/14812	25
Human Diseases	Cancer: specific types	mmu05212	Pancreatic cancer	27/1385	76/10650	0.355263	2.73181	5.85792	4.44278e-07	4.04653e-06	2.24983e-06	17126/56044/19353/26413/19645/18805/26420/170758/19697/11651/21812/13866/12371/16150/12675/16653/18707/23797/17128/242705/72508/19765/21808/16451/13557/12540/18706	27
Human Diseases	Infectious disease: viral	mmu05165	Human papillomavirus infection	80/1385	359/10650	0.222841	1.71354	5.31736	5.71908e-07	5.05859e-06	2.81252e-06	56458/14924/14371/12387/93742/19699/12448/26932/328572/19211/22422/18749/56480/22411/269643/14683/26413/12006/13383/19303/19645/19719/14367/18759/105782/12447/21770/192897/22412/216795/16412/16897/12576/15208/235542/19697/93897/11651/15182/19664/18131/16150/114143/12695/12675/104099/22031/12445/22418/58220/56513/56217/12841/20663/26931/21871/16653/16402/18707/21415/13544/23797/19052/14369/18747/7…	80
Environmental Information Processing	Signal transduction	mmu04072	Phospholipase D signaling pathway	42/1385	149/10650	0.281879	2.16752	5.54879	5.85715e-07	5.05859e-06	2.81252e-06	11845/104418/56044/18591/19247/67512/14683/26413/18798/11848/18750/14745/216148/18805/432530/11651/65086/380921/18797/271849/19158/20963/11840/20130/18803/20663/16653/13430/14823/18707/19157/11515/66922/23797/52123/19744/14360/13429/18719/14389/18706/14061	42
Human Diseases	Infectious disease: bacterial	mmu05100	Bacterial invasion of epithelial cells	27/1385	77/10650	0.350649	2.69633	5.77581	6.00426e-07	5.05859e-06	2.81252e-06	83767/12387/330662/20362/19353/76709/19303/78514/11848/71890/16412/12927/216148/17295/24050/52398/271849/53860/12385/13430/16402/18707/140579/12540/13429/73178/18706	27
Environmental Information Processing	Signal transduction	mmu04151	PI3K-Akt signaling pathway	81/1385	368/10650	0.220109	1.69253	5.22735	8.26673e-07	6.79485e-06	3.77786e-06	14183/16001/14924/14707/19699/14172/105787/12448/26932/22629/19211/18591/13640/54401/19353/269643/14701/98432/20104/109333/26413/14700/170755/22631/14174/12447/18750/21770/192897/14745/12125/108079/14706/16412/12576/14255/17863/235542/19697/11651/65086/14688/13866/12371/74370/17295/16150/22630/20869/14180/13869/13638/12675/104099/56484/15519/12445/16452/20963/16194/14573/80857/12841/20663/26931/1…	81
Human Diseases	Substance dependence	mmu05032	Morphine addiction	30/1385	93/10650	0.322581	2.48049	5.54414	1.12296e-06	9.01038e-06	5.00968e-06	218461/18576/14707/12286/110886/18749/18584/14701/14683/14700/14677/18750/14706/14678/432530/216869/14688/18577/23984/18583/320129/54393/14400/14397/109689/14402/11515/18747/238871/12287	30
Organismal Systems	Endocrine system	mmu04921	Oxytocin signaling pathway	42/1385	154/10650	0.272727	2.09714	5.30236	1.52823e-06	1.1977e-05	6.65911e-06	16520/19055/12323/105787/232807/54720/18749/12289/14683/26413/14677/19877/18798/18018/11848/18021/14682/17931/20192/18750/108079/19047/434233/14678/207565/432530/12298/12325/19057/18797/108058/19045/12313/12295/16653/11515/56808/12288/18747/12293/12300/12294	42
Environmental Information Processing	Signal transduction	mmu04024	cAMP signaling pathway	55/1385	224/10650	0.245536	1.88805	5.19351	1.56797e-06	1.20092e-05	6.677e-06	18576/12323/17356/67972/215449/11928/328572/11938/18749/19353/12289/239273/109305/14683/26413/16526/15166/14677/19877/18018/11848/17931/19047/434233/14678/18805/26420/432530/170758/19697/11651/12325/18577/108058/19045/12313/23984/20130/54393/19206/14634/18707/11515/66922/23797/330953/14814/12288/18747/11933/14812/238871/170483/18706/21844	55
Human Diseases	Cancer: specific types	mmu05220	Chronic myeloid leukemia	26/1385	76/10650	0.342105	2.63063	5.51568	1.65922e-06	1.24257e-05	6.90857e-06	13017/19247/26413/19645/13016/12576/216148/19697/11651/15182/21812/16150/12675/271849/12394/20663/16653/18707/23797/17128/242705/21808/13557/14389/20851/18706	26
Organismal Systems	Aging	mmu04211	Longevity regulating pathway	29/1385	90/10650	0.322222	2.47774	5.44306	1.73257e-06	1.26929e-05	7.05713e-06	16001/56458/105787/77683/18749/75747/12421/108079/207565/432530/16591/19697/11651/72674/74370/20869/110147/56484/16653/18707/19016/11515/23797/18747/72508/19744/13684/18706/384783	29
Cellular Processes	Transport and catabolism	mmu04137	Mitophagy - animal	31/1385	100/10650	0.31	2.38375	5.37514	1.95572e-06	1.40229e-05	7.79659e-06	13000/23806/69104/20437/56480/21425/66313/66734/14479/100756/23802/22186/68943/13666/26420/19697/56715/56484/67414/71648/20130/213948/16653/53375/245860/66922/271457/12177/228361/75788/269523	31
Genetic Information Processing	Folding, sorting and degradation	mmu04120	Ubiquitin mediated proteolysis	42/1385	156/10650	0.269231	2.07026	5.20639	2.20476e-06	1.54793e-05	8.60631e-06	66799/70790/50868/22196/56228/12211/83814/20437/26965/22214/107568/106052/66313/68098/140499/67921/22186/56371/76980/56550/75717/22194/22213/216080/50754/69957/12702/99375/15204/100763/231380/68729/26374/245350/229615/67128/26401/268470/75788/56469/22195/117146	42
Human Diseases	Neurodegenerative disease	mmu05010	Alzheimer disease	83/1385	389/10650	0.213368	1.6407	4.97725	2.28759e-06	1.5733e-05	8.74739e-06	13000/19055/14371/12387/66218/29869/11938/16973/22422/26408/22335/74781/22411/72900/12289/56436/26413/12006/18798/16593/228033/17762/14367/14682/20192/22412/216795/12334/12421/12861/20422/16572/70316/11946/11441/13666/26420/69806/18174/19697/93897/11651/12371/19057/16150/11957/18797/12313/12675/19181/68427/22418/11785/17380/16653/215999/52639/12857/27373/12671/18707/13544/212398/23797/14814/14296…	83
Organismal Systems	Endocrine system	mmu04935	Growth hormone synthesis, secretion and action	34/1385	117/10650	0.290598	2.23456	5.19143	3.25251e-06	2.19219e-05	1.21884e-05	328572/26398/18749/12289/14683/26413/14677/18798/14682/18750/14678/12927/216148/26420/432530/11651/18797/12702/271849/16452/216233/18803/20663/16653/18707/11515/23797/26401/12288/18747/56637/20851/18706/384783	34
Cellular Processes	Cell growth and death	mmu04218	Cellular senescence	46/1385	183/10650	0.251366	1.93289	4.92153	5.67527e-06	3.75013e-05	2.08503e-05	56458/17126/19055/12448/15258/19211/13559/22335/12289/72568/26413/18018/19645/15259/18021/12447/12530/14235/58800/12334/19047/434233/104394/19697/11651/21812/19057/17865/19045/12313/56484/12445/20130/12193/16653/215999/63873/18707/66922/23797/242705/21808/13557/19744/11740/18706	46
Environmental Information Processing	Signal transduction	mmu04071	Sphingolipid signaling pathway	36/1385	131/10650	0.274809	2.11315	4.95633	6.966e-06	4.5145e-05	2.51002e-05	26932/19211/26408/208449/19353/269643/26413/14677/19877/18798/11848/14682/18750/21770/14678/18805/26420/170758/235542/18386/19697/11651/18797/93898/26931/16653/71949/230379/18707/23797/19052/20397/14360/74442/14389/18706	36
Organismal Systems	Nervous system	mmu04727	GABAergic synapse	28/1385	91/10650	0.307692	2.36601	5.05964	7.11829e-06	4.52616e-05	2.5165e-05	14707/12286/110886/14660/18749/67760/12289/14701/14700/14677/18750/14706/14678/432530/268566/14688/227120/216456/232333/57138/54393/14400/14397/14402/11515/12288/18747/12287	28
Human Diseases	Cancer: specific types	mmu05215	Prostate cancer	31/1385	107/10650	0.28972	2.22781	4.93511	9.33722e-06	5.8002e-05	3.22485e-05	14183/16001/56458/12387/12448/328572/19211/18591/21417/26413/19645/12447/104156/12576/19697/11651/13866/12371/16150/12675/15519/20663/16653/18707/21415/23797/242705/56637/13557/18706/14182	31
Metabolism	Amino acid metabolism	mmu00310	Lysine degradation	22/1385	64/10650	0.34375	2.64328	5.0979	9.4662e-06	5.8002e-05	3.22485e-05	208266/225888/77683/110593/192195/234135/14056/67956/226830/234407/235626/75410/14055/110147/107823/18822/73251/225518/208043/18193/84505/231051	22
Environmental Information Processing	Signal transduction	mmu04012	ErbB signaling pathway	26/1385	84/10650	0.309524	2.38009	4.90964	1.33164e-05	8.0136e-05	4.45548e-05	12323/17974/26398/26413/18750/18183/12576/216148/26420/11352/11651/211323/12325/13866/108058/13869/271849/18803/20663/16653/18707/23797/72508/56637/20851/18706	26
Organismal Systems	Endocrine system	mmu04910	Insulin signaling pathway	37/1385	140/10650	0.264286	2.03223	4.75332	1.37985e-05	8.15807e-05	4.5358e-05	56458/18576/105787/18749/20104/26413/19088/23921/18759/108079/19047/434233/216148/26420/11651/74370/16150/19045/12313/12702/212111/271849/216233/20663/16653/18707/20411/105651/23797/18747/72508/56637/19744/19268/13684/18706/384783	37
Cellular Processes	Cell growth and death	mmu04110	Cell cycle	40/1385	157/10650	0.254777	1.95912	4.68088	1.61744e-05	9.39791e-05	5.22514e-05	17126/12448/26932/328572/21781/22629/22390/13559/26965/54401/12577/20842/27214/19645/22631/71890/12447/12530/71521/21770/218294/104394/56371/12576/15182/20843/22630/69957/211586/12445/218914/26931/19052/17128/242705/56637/21808/12580/13557/22642	40
Organismal Systems	Immune system	mmu04611	Platelet activation	34/1385	126/10650	0.269841	2.07495	4.69289	1.8964e-05	0.00010832	6.02247e-05	215449/18749/109305/14683/26413/14677/19877/18798/69632/11848/14682/17931/18759/16412/19047/434233/14678/432530/11651/18797/19045/20963/67938/67268/19419/18707/11515/23797/18747/14360/14724/18706/14061/14131	34
Environmental Information Processing	Signal transduction	mmu04070	Phosphatidylinositol signaling system	28/1385	96/10650	0.291667	2.24278	4.72909	2.17531e-05	0.00012218	6.79308e-05	104418/19211/18711/108083/18798/18750/217837/240752/67073/74302/380921/53332/107650/18797/54384/224020/12313/212111/27399/77116/18803/18707/74596/242291/18719/233011/18706/97287	28
Environmental Information Processing	Signal transduction	mmu04330	Notch signaling pathway	21/1385	63/10650	0.333333	2.56318	4.81115	2.56635e-05	0.000140197	7.7948e-05	13017/328572/16450/56381/21885/13016/19719/207521/18519/15208/15182/19664/18131/67122/13388/21886/14534/13544/18132/16449/103806	21
Environmental Information Processing	Signal transduction	mmu04068	FoxO signaling pathway	35/1385	133/10650	0.263158	2.02356	4.59251	2.57929e-05	0.000140197	7.7948e-05	16001/56458/105787/12053/328572/19211/329934/252870/26557/26413/170755/12125/108079/12576/26420/11651/21812/16150/20869/12675/56484/12795/20663/16653/27373/18707/26558/23797/17128/15228/21808/216439/73251/18706/384783	35
Human Diseases	Cancer: specific types	mmu05210	Colorectal cancer	26/1385	88/10650	0.295455	2.27191	4.63212	3.30955e-05	0.000177035	9.84294e-05	17126/12387/56044/19353/26413/12006/11848/12125/17685/26420/170758/11651/21812/12371/17688/20663/16653/18707/21415/23797/17128/72508/56637/21808/11789/18706	26
Genetic Information Processing	Chromosome	mmu03082	ATP-dependent chromatin remodeling	35/1385	136/10650	0.257353	1.97892	4.44212	4.28535e-05	0.00022565	0.000125459	13445/93760/268996/77045/26914/217578/67155/26992/77044/77605/17191/227195/116871/210982/68094/12054/15182/104457/116870/12055/29861/66993/70088/235134/20586/22632/22385/17192/269397/93762/239985/330409/57376/245688/216848	35
Human Diseases	Cancer: overview	mmu05202	Transcriptional misregulation in cancer	51/1385	226/10650	0.225664	1.73525	4.31944	4.47988e-05	0.000232264	0.000129136	16001/56458/108829/208266/12606/15242/268996/20182/12053/107951/12608/12395/21417/22290/19696/21423/16825/21908/12393/104156/12151/17125/53618/12576/16909/14255/19697/15182/20185/15078/17295/68938/545192/107823/12394/64144/19016/140780/212980/18516/17132/269397/58208/15364/22289/15395/12580/16599/14011/22642/18647	51
Organismal Systems	Endocrine system	mmu04912	GnRH signaling pathway	26/1385	90/10650	0.288889	2.22142	4.49895	5.07081e-05	0.000258918	0.000143956	12323/26398/18749/12289/14683/26413/18798/14682/18750/18805/26420/432530/12325/18797/108058/12313/17387/13653/20663/26407/16653/11515/26401/12288/18747/12540	26
Human Diseases	Neurodegenerative disease	mmu05022	Pathways of neurodegeneration - multiple diseases	92/1385	481/10650	0.191268	1.47076	4.085	6.65788e-05	0.000334881	0.00018619	13000/19055/12323/14371/12387/66218/380684/29869/11938/16973/22422/56228/26408/22335/56480/74781/22411/72900/19353/12289/18951/56436/26413/12006/18798/16593/228033/66734/17762/14367/14682/20192/18750/22412/216795/12334/12421/12861/20422/16572/140499/70316/11946/22186/11441/68943/13666/26420/19697/93897/12325/12371/19057/22213/11957/18797/108058/12313/22065/19181/67414/22418/71648/18803/16653/2159…	92
Cellular Processes	Cell growth and death	mmu04114	Oocyte meiosis	32/1385	123/10650	0.260163	2.00053	4.31505	7.17401e-05	0.000355535	0.000197674	231207/16001/19055/12323/12448/208922/26932/22629/18749/26965/54401/26413/22631/71890/12447/21770/19047/434233/20111/432530/12325/19057/22630/108058/69957/19045/12313/26931/110651/11515/19052/18747	32
Environmental Information Processing	Signal transduction	mmu04340	Hedgehog signaling pathway	19/1385	58/10650	0.327586	2.51898	4.48472	8.07012e-05	0.00039247	0.000218209	18749/26965/104318/66313/16147/76857/216869/320129/109689/226861/233812/19206/27373/14634/70425/18747/56637/14451/75788	19
Human Diseases	Cancer: overview	mmu05207	Chemical carcinogenesis - receptor activation	51/1385	231/10650	0.220779	1.69769	4.14487	8.17532e-05	0.00039247	0.000218209	12224/12286/14172/20182/12053/18749/12289/14683/26413/14677/19645/14174/18750/12530/16646/16600/14678/11441/20111/432530/19697/216869/11651/56351/14180/15519/12445/16452/11632/13388/80857/20663/109689/13982/16653/110651/18707/384214/14173/11515/23797/16648/387251/12288/18747/72508/16449/20851/18706/11622/12287	51
Cellular Processes	Cellular community - eukaryotes	mmu04510	Focal adhesion	46/1385	202/10650	0.227723	1.75108	4.1668	8.26866e-05	0.00039247	0.000218209	16001/12387/19699/215449/232807/330662/19211/18591/19353/26413/19303/19877/11848/17931/18750/192897/12334/16412/19047/434233/12927/216148/26420/170758/11651/13866/17295/19045/104099/271849/12445/67938/67268/12841/20663/109711/16402/18707/11855/23797/56637/12540/14360/16400/18719/18706	46
Environmental Information Processing	Signal transduction	mmu04020	Calcium signaling pathway	55/1385	255/10650	0.215686	1.65853	4.11517	8.52486e-05	0.000399011	0.000221846	14183/19055/12286/12323/67972/14172/11938/18591/18749/22335/12289/109305/14683/21425/18798/18018/14680/11550/15566/14174/18021/14682/20192/18750/11441/15465/432530/12325/13866/17295/19057/110893/18797/108058/14180/12313/13869/14573/80857/18803/215999/18213/12671/14173/11515/14814/116873/12288/18747/14812/11740/233011/170483/12287/14182	55
Human Diseases	Cancer: specific types	mmu05217	Basal cell carcinoma	20/1385	63/10650	0.31746	2.44112	4.43548	8.70162e-05	0.000401705	0.000223344	14371/12387/22422/22411/12156/12006/14367/22412/216795/93897/22418/19206/14634/21415/13544/14369/56637/14366/22417/11789	20
Metabolism	Glycan biosynthesis and metabolism	mmu00533	Glycosaminoglycan biosynthesis - keratan sulfate	8/1385	14/10650	0.571429	4.39402	4.91299	0.000116321	0.000529733	0.000294526	53625/56375/20444/20441/53618/53418/54371/76969	8
Organismal Systems	Immune system	mmu04062	Chemokine signaling pathway	44/1385	194/10650	0.226804	1.74402	4.0435	0.00012913	0.000580226	0.000322599	14707/93742/215449/18749/19353/14701/26413/14700/19303/14677/19877/18798/11848/14682/14706/14678/12927/216148/432530/170758/19697/216869/11651/14688/16150/18797/12675/56484/271849/16452/320129/18803/20663/109689/16653/18707/11515/23797/18747/56637/12540/20851/18706/21844	44
Organismal Systems	Environmental adaptation	mmu04713	Circadian entrainment	27/1385	100/10650	0.27	2.07617	4.18035	0.000131444	0.000582849	0.000324058	14707/12323/18749/12289/14701/14683/26413/14700/14677/18798/14682/20192/18750/14706/14678/432530/12325/14688/18797/108058/12313/70729/11515/14814/12288/18747/14812	27
Environmental Information Processing	Signal transduction	mmu04022	cGMP-PKG signaling pathway	40/1385	172/10650	0.232558	1.78826	4.02951	0.00014608	0.000634844	0.000352966	18576/19055/16531/67972/11928/11938/22335/17258/12289/26413/14677/19877/18798/18018/11848/11550/18021/14682/17931/19047/434233/14678/242202/432530/18386/11651/19057/110893/18797/19045/12313/58802/17261/11515/20807/23797/12288/11933/11740/384783	40
Organismal Systems	Digestive system	mmu04971	Gastric acid secretion	22/1385	75/10650	0.293333	2.2556	4.21888	0.000146937	0.000634844	0.000352966	12323/11928/18749/14683/16526/14677/18798/14682/18750/14678/432530/12325/18797/12349/108058/12313/16535/12671/11515/18747/11933/20535	22
Organismal Systems	Aging	mmu04213	Longevity regulating pathway - multiple species	19/1385	61/10650	0.311475	2.3951	4.22473	0.000172243	0.000734759	0.000408518	16001/56458/105787/18749/108079/432530/11651/15182/74370/13688/56484/16653/18707/11515/23797/18747/72508/18706/384783	19
Metabolism	Carbohydrate metabolism	mmu00562	Inositol phosphate metabolism	22/1385	77/10650	0.285714	2.19701	4.07568	0.000223771	0.000942637	0.000524096	19211/18711/108083/18798/217837/240752/67073/74302/53332/107650/18797/54384/224020/212111/27399/77116/18803/18707/18719/233011/18706/97287	22
Human Diseases	Cancer: overview	mmu05231	Choline metabolism in cancer	26/1385	98/10650	0.265306	2.04008	3.99916	0.000236291	0.000983086	0.000546585	83767/104418/18777/18591/19353/26413/18750/12660/100434/18805/26420/170758/11651/380921/74182/18803/20519/20663/16653/18707/23797/245880/72508/19744/18719/18706	26
Human Diseases	Cancer: overview	mmu05206	MicroRNAs in cancer	63/1385	314/10650	0.200637	1.5428	3.77475	0.000243372	0.0010002	0.000556101	723930/19684/18712/12448/328572/13436/22196/14660/19211/18591/15387/13640/108655/14056/21417/13433/26413/19877/13435/53614/11848/723968/12447/18750/12530/12151/12125/22762/171543/11987/12576/15182/13866/18131/74370/17295/16150/216456/13638/271849/18803/20663/16653/17118/16402/22003/18707/387194/208727/12168/242705/212980/387251/15364/18569/18132/24064/21808/13557/11789/18706/384783/723951	63
Human Diseases	Cancer: overview	mmu05235	PD-L1 expression and PD-1 checkpoint pathway in cancer	24/1385	88/10650	0.272727	2.09714	3.99566	0.000258281	0.00104868	0.000583057	13000/19055/19211/19247/26413/18018/18021/19697/11651/19057/16150/12675/16452/18803/74481/11682/19419/15980/16653/18707/23797/72508/16451/18706	24
Genetic Information Processing	Information processing in viruses	mmu03250	Viral life cycle - HIV-1	19/1385	63/10650	0.301587	2.31906	4.05982	0.000275288	0.00110443	0.000614051	93736/19384/18550/328572/107951/208092/101739/27632/18519/432508/64144/14534/19386/235180/75608/116733/269061/103573/22088	19
Organismal Systems	Immune system	mmu04660	T cell receptor signaling pathway	30/1385	122/10650	0.245902	1.89087	3.82628	0.000347875	0.00137922	0.000766832	19055/17974/26932/19247/269643/26413/13383/18018/11848/18021/21770/26420/235542/19697/11651/19057/16150/12675/18803/20663/19419/26931/16653/18707/23797/19052/56637/12540/14360/18706	30
Human Diseases	Cancer: specific types	mmu05214	Glioma	21/1385	75/10650	0.28	2.15307	3.87438	0.000417251	0.00163504	0.000909067	16001/12323/19211/18591/26413/19645/18750/216148/11651/12325/108058/12313/271849/18803/20663/16653/18707/23797/242705/13557/18706	21
Organismal Systems	Endocrine system	mmu04911	Insulin secretion	23/1385	86/10650	0.267442	2.0565	3.80331	0.000467885	0.00181238	0.00100766	16531/12323/11928/116838/18749/12289/14683/18798/14682/18750/22318/20525/432530/12325/18797/108058/58802/12671/11515/12288/18747/11933/84036	23
Human Diseases	Cardiovascular disease	mmu05414	Dilated cardiomyopathy	26/1385	103/10650	0.252427	1.94105	3.71041	0.000548289	0.0020997	0.00116741	13138/11938/18749/20650/12289/14683/192897/16412/432530/12298/110893/12295/104099/24051/16402/22003/11515/56808/12288/18747/21808/17897/16400/12293/12300/12294	26
Organismal Systems	Endocrine system	mmu04926	Relaxin signaling pathway	31/1385	131/10650	0.236641	1.81966	3.64954	0.000570588	0.00216054	0.00120124	17126/14707/26398/18749/14701/14683/26413/14700/14677/18798/18750/14706/14678/216148/26420/432530/19697/216869/11651/21812/14688/18797/271849/20663/109689/16653/18707/11515/23797/18747/18706	31
Organismal Systems	Endocrine system	mmu04914	Progesterone-mediated oocyte maturation	24/1385	93/10650	0.258065	1.9844	3.68636	0.000626727	0.00232561	0.00129301	231207/16001/18576/208922/18749/26413/14677/71890/12530/14678/20111/56371/26420/432530/11651/69957/15519/16653/110651/18707/11515/23797/18747/18706	24
Organismal Systems	Endocrine system	mmu04920	Adipocytokine signaling pathway	20/1385	72/10650	0.277778	2.13598	3.73931	0.000634884	0.00232561	0.00129301	105787/20182/19247/108079/207565/20525/26420/14081/19697/11651/72674/16150/20869/216739/12702/12675/12894/16452/23797/384783	20
Human Diseases	Cancer: specific types	mmu05223	Non-small cell lung cancer	20/1385	72/10650	0.277778	2.13598	3.73931	0.000634884	0.00232561	0.00129301	20182/26413/19645/18750/16572/11651/13866/12371/17295/56484/18803/11682/20663/16653/18707/23797/242705/13557/20851/18706	20
Organismal Systems	Excretory system	mmu04961	Endocrine and other factor-regulated calcium reabsorption	18/1385	62/10650	0.290323	2.23244	3.76281	0.000658296	0.00238544	0.00132628	67972/11928/18749/14683/18798/14682/18750/16591/110893/18797/11771/13982/13430/11515/18747/19228/11933/13429	18
Organismal Systems	Immune system	mmu04658	Th1 and Th2 cell differentiation	23/1385	88/10650	0.261364	2.00976	3.67743	0.000665706	0.00238663	0.00132694	19055/16450/26413/18018/18021/26420/19697/19664/18131/19057/16150/12675/16452/12399/13388/18803/15980/14969/17132/16451/16449/103806/20851	23
Human Diseases	Endocrine and metabolic disease	mmu04931	Insulin resistance	27/1385	110/10650	0.245455	1.88743	3.61715	0.00069374	0.00245977	0.0013676	56458/105787/19211/19247/208104/26569/108079/19047/434233/20525/20111/26420/19697/11651/16150/19045/12702/12894/110651/18707/105651/23797/72508/56637/19268/18706/384783	27
Metabolism	Glycan biosynthesis and metabolism	mmu00532	Glycosaminoglycan biosynthesis - chondroitin sulfate / dermatan sulfate	9/1385	21/10650	0.428571	3.29551	4.07099	0.000700705	0.00245977	0.0013676	74241/217119/233781/78752/338362/78923/72727/58250/117592	9
Metabolism	Glycan biosynthesis and metabolism	mmu00514	Other types of O-glycan biosynthesis	14/1385	43/10650	0.325581	2.50357	3.8196	0.000736512	0.00254431	0.00141461	108148/140484/234407/232313/19719/223827/271786/20441/231050/53418/230145/224143/108150/94192	14
Organismal Systems	Immune system	mmu04666	Fc gamma R-mediated phagocytosis	24/1385	94/10650	0.255319	1.96328	3.62681	0.00073989	0.00254431	0.00141461	11845/83767/330662/19353/26413/76709/18750/12632/18805/11651/20963/211914/18803/17118/13430/18707/23797/245880/72508/12540/18719/14389/18706/14131	24
Organismal Systems	Immune system	mmu04659	Th17 cell differentiation	26/1385	105/10650	0.247619	1.90407	3.59942	0.000750405	0.00255441	0.00142022	17126/19055/20182/26413/16195/18018/18021/19883/26420/19697/21812/19057/16150/12675/15519/16452/16194/18803/12394/15980/14969/16180/17128/16451/20851/11622	26
Organismal Systems	Environmental adaptation	mmu04710	Circadian rhythm	12/1385	34/10650	0.352941	2.71395	3.87003	0.000774957	0.0026116	0.00145202	12753/105787/26965/353187/104318/11865/108079/19883/12952/13170/27373/18143	12
Environmental Information Processing	Signal transduction	mmu04370	VEGF signaling pathway	17/1385	58/10650	0.293103	2.25383	3.70186	0.000817432	0.00270073	0.00150158	19055/19353/26413/19303/18750/216148/170758/11651/12371/19057/18803/16653/18707/23797/12540/15507/18706	17
Human Diseases	Cancer: specific types	mmu05213	Endometrial cancer	17/1385	58/10650	0.293103	2.25383	3.70186	0.000817432	0.00270073	0.00150158	12387/19211/26413/12006/11651/13866/12371/56484/20663/16653/12385/18707/21415/23797/56637/11789/18706	17
Human Diseases	Infectious disease: viral	mmu05166	Human T-cell leukemia virus 1 infection	50/1385	247/10650	0.202429	1.55659	3.42182	0.000833582	0.00272735	0.00151638	17126/19384/19055/12448/328572/26398/19211/18749/22335/26413/13383/18018/19645/19385/21423/18021/12447/20525/18519/26420/432530/19697/11651/21812/19057/16150/234729/69957/12675/12445/13653/16653/14534/14969/18707/11515/20807/23797/17128/242705/26401/18747/21808/16451/12580/13557/103573/11740/20851/18706	50
Human Diseases	Endocrine and metabolic disease	mmu04933	AGE-RAGE signaling pathway in diabetic complications	25/1385	101/10650	0.247525	1.90335	3.52669	0.000945622	0.00306418	0.00170365	56458/17126/18712/19353/26413/18798/18018/18750/12576/26420/19697/11651/21812/18797/16452/13653/18803/16653/18707/23797/17128/21808/12540/20851/18706	25
Human Diseases	Substance dependence	mmu05031	Amphetamine addiction	19/1385	69/10650	0.275362	2.11741	3.60022	0.000965308	0.00307618	0.00171032	19055/12323/18749/12289/14683/18750/19047/434233/15182/12325/19057/108058/19045/12313/14814/12288/18747/14812/170483	19
Human Diseases	Infectious disease: viral	mmu05161	Hepatitis B	36/1385	164/10650	0.219512	1.68795	3.43264	0.000967581	0.00307618	0.00171032	12448/328572/26398/22335/56480/54401/26413/18018/19645/22631/18021/12447/18750/26420/19697/11651/21812/12371/16150/22630/12675/22031/16452/20663/16653/18707/68652/23797/17128/242705/26401/21808/16451/13557/20851/18706	36
Human Diseases	Infectious disease: parasitic	mmu05142	Chagas disease	25/1385	103/10650	0.242718	1.86639	3.41605	0.00127841	0.0040264	0.00223864	17126/26398/269643/14683/26413/14677/18798/14680/11421/14682/14678/26420/432530/19697/11651/21812/16150/18797/12675/15980/18707/23797/19052/21808/18706	25
Human Diseases	Cardiovascular disease	mmu05418	Fluid shear stress and atherosclerosis	33/1385	149/10650	0.221477	1.70305	3.34134	0.00131744	0.00411092	0.00228563	12387/105787/50868/20610/26398/18591/26408/17258/19353/11848/11477/108079/170930/26420/170758/19697/11651/16150/12313/12675/15519/16800/22166/63873/11481/18707/12168/23797/11480/12166/19252/22218/18706	33
Human Diseases	Infectious disease: bacterial	mmu05152	Tuberculosis	38/1385	180/10650	0.211111	1.62335	3.26098	0.00152634	0.00471906	0.00262375	19055/216238/12323/328572/12608/192656/12611/170767/26413/15510/69632/11848/26420/16706/19697/11651/12325/12371/19057/114143/108058/12313/16452/20963/12795/15980/16155/21871/14969/16783/23797/271457/21808/16451/18044/18046/108664/14131	38
Human Diseases	Cardiovascular disease	mmu05417	Lipid and atherosclerosis	44/1385	217/10650	0.202765	1.55917	3.21754	0.00160486	0.00491671	0.00273364	19055/12323/215449/20182/26398/26408/56480/19353/18987/22359/26413/15510/18798/18018/11848/18021/18750/13666/26420/19697/11651/12325/12371/15525/19057/16150/18797/108058/12313/12675/15519/22031/16452/18803/16653/18707/19016/68652/23797/18986/56637/12540/78943/18706	44
Human Diseases	Cancer: specific types	mmu05218	Melanoma	19/1385	72/10650	0.263889	2.02918	3.38776	0.00167731	0.00509238	0.00283131	16001/14172/19211/18591/26413/19645/14174/11651/17295/14180/80857/16653/18707/14173/23797/242705/13557/18706/14182	19
Human Diseases	Cardiovascular disease	mmu05410	Hypertrophic cardiomyopathy	24/1385	100/10650	0.24	1.84549	3.28426	0.00186494	0.00558978	0.00310786	105787/13138/11938/20650/12289/11421/192897/108079/16412/12298/110893/12295/104099/24051/16402/22003/56808/12288/21808/17897/16400/12293/12300/12294	24
Human Diseases	Infectious disease: viral	mmu05163	Human cytomegalovirus infection	50/1385	256/10650	0.195312	1.50186	3.14245	0.00187432	0.00558978	0.00310786	19055/14707/12387/18749/56480/19353/14701/14683/26413/14700/19303/14677/19877/18798/18018/69632/19645/11848/18021/14682/18750/14706/14678/12927/432530/170758/19697/11651/14688/12371/19057/16150/18797/12313/12675/16194/20663/16155/16653/18707/11515/23797/242705/18747/72508/56637/16451/13557/19744/18706	50
Organismal Systems	Immune system	mmu04625	C-type lectin receptor signaling pathway	26/1385	112/10650	0.232143	1.78507	3.2292	0.00205152	0.00606458	0.00337184	19055/19247/26413/18018/69632/11848/18021/26420/16706/19697/11651/19057/16150/12313/12051/12675/20963/12795/20130/16653/74256/18707/66922/23797/239114/18706	26
Genetic Information Processing	Folding, sorting and degradation	mmu04141	Protein processing in endoplasmic reticulum	37/1385	177/10650	0.20904	1.60742	3.1506	0.00209698	0.00614507	0.0034166	56085/56445/17156/217379/67397/56228/26408/26965/100037258/105245/99683/69162/107513/213539/230815/23802/12334/140499/13666/26420/56550/22213/59007/216080/18415/15519/54609/94232/223455/217365/13002/140740/67128/192193/69276/269523/78943	37
Metabolism	Glycan biosynthesis and metabolism	mmu00534	Glycosaminoglycan biosynthesis - heparan sulfate / heparin	9/1385	24/10650	0.375	2.88357	3.57158	0.00216615	0.00629304	0.00349886	50787/217119/233781/23908/72727/50785/15531/54710/117592	9
Organismal Systems	Endocrine system	mmu04929	GnRH secretion	17/1385	63/10650	0.269841	2.07495	3.30849	0.00222565	0.00641063	0.00356424	12289/26413/15166/18798/14682/18750/216869/11651/18797/54393/109689/16653/18707/23797/12288/18706/84036	17
Environmental Information Processing	Signaling molecules and interaction	mmu04082	Neuroactive ligand signaling	40/1385	196/10650	0.204082	1.56929	3.11013	0.00225815	0.00644913	0.00358565	14707/110886/110637/18749/14701/14683/14700/14677/18798/14680/11550/15566/14682/18750/14706/14678/11441/15465/14658/432530/20511/18386/14688/18797/232333/54393/14400/14397/72961/20510/14402/14823/12671/99296/11515/14814/18747/14812/70155/170483	40
Organismal Systems	Endocrine system	mmu04917	Prolactin signaling pathway	19/1385	74/10650	0.256757	1.97434	3.25178	0.00236593	0.00670015	0.00372521	192157/26413/216148/26420/19697/11651/12702/56484/271849/16452/216233/20663/13982/16653/18707/23797/56637/20851/18706	19
Human Diseases	Infectious disease: bacterial	mmu05132	Salmonella infection	49/1385	253/10650	0.193676	1.48928	3.04521	0.00247727	0.006957	0.00386802	50884/11845/170625/12387/27205/56044/26398/192656/19353/26413/76709/13424/16593/11848/16646/16572/240752/26420/17920/19697/11651/11308/16150/68097/12675/15519/19158/11840/20130/67938/67268/18645/22166/13430/18707/21415/19157/140579/70297/68652/23797/271457/16648/245880/18643/12540/73178/18706/20336	49
Human Diseases	Cardiovascular disease	mmu05412	Arrhythmogenic right ventricular cardiomyopathy	21/1385	86/10650	0.244186	1.87768	3.15955	0.00279201	0.0077761	0.00432343	12387/13138/11938/20650/12289/192897/16412/12298/110893/12295/104099/24051/12385/16402/21415/56808/12288/16400/12293/12300/12294	21
Human Diseases	Cancer: specific types	mmu05221	Acute myeloid leukemia	18/1385	70/10650	0.257143	1.97731	3.17172	0.00299136	0.00826303	0.00459416	12606/18712/12395/26413/14255/19697/11651/16150/12675/12394/20663/16653/18707/21415/23797/72508/20851/18706	18

## Sheet: Data S4
Data S4. Enrichment of KEGG pathways for Dnmt1tet/tet hypomethylated promoter DMRs (related to Figure 3)
Category	Subcategory	ID	Description	GeneRatio	BackgroundRatio	EnrichmentFactor	FoldEnrichment	zScore	p-value	Adjusted p-value	q-value	GeneID	Count
Cellular Processes	Cell motility	mmu04820	Cytoskeleton in muscle cells	80/1831	233/10650	0.343348	1.99708	7.01173	1.25979e-10	4.38408e-08	3.46112e-08	20392/18810/21954/17896/17996/16419/12834/16421/242702/13405/13806/21827/433766/71355/11717/244431/12840/17901/17906/13808/12833/16480/11931/16906/11735/17898/13179/13527/20391/98660/50874/208846/544791/13009/192897/12828/12814/17897/17879/21955/16399/54418/668940/68553/241431/74103/70549/319565/13008/11603/12842/12845/71960/93689/57778/59069/21952/21916/100504518/13807/53867/16651/53311/380698/6…	80
Environmental Information Processing	Signal transduction	mmu04020	Calcium signaling pathway	77/1831	255/10650	0.301961	1.75635	5.57021	1.64733e-07	2.86635e-05	2.26291e-05	18125/18595/73181/74055/12290/21425/171166/20698/68279/12286/104110/11549/14676/16438/12372/18216/12289/18797/19216/21390/14812/14178/228785/14164/18440/15234/15465/18799/18803/22333/21337/12669/12291/12323/18802/18796/15562/238564/14829/18573/12288/12373/14683/11941/14172/13645/269717/53313/20866/12671/14180/110893/12062/109305/18127/21802/170483/14814/14257/14810/11554/18750/11739/13869/14183/1…	77
Environmental Information Processing	Signaling molecules and interaction	mmu04082	Neuroactive ligand signaling	62/1831	196/10650	0.316327	1.83991	5.40766	4.48004e-07	5.19685e-05	4.10277e-05	268934/14406/104245/14395/104110/14400/11512/11549/21334/108068/14394/14806/12647/54393/18797/14823/14812/57249/18387/14799/18440/14805/15465/216643/14412/14399/21337/21333/224129/15552/12669/18796/15562/57014/14695/22348/14683/14654/14411/20511/64337/18619/14678/12671/14401/108015/140919/18976/170483/14814/13490/14810/99296/11554/18750/242425/14800/242607/108071/18390/13162/11541	62
Human Diseases	Cardiovascular disease	mmu05412	Arrhythmogenic right ventricular cardiomyopathy	33/1831	86/10650	0.383721	2.23191	5.2264	2.27587e-06	0.000198	0.000156316	20392/18125/16419/16421/54376/13405/12289/244431/319734/12386/16480/54377/12385/13527/140723/20391/192897/16399/21415/12288/56808/53313/16651/110893/12295/109620/12298/16400/16842/21416/16772/12296/11472	33
Organismal Systems	Nervous system	mmu04724	Glutamatergic synapse	40/1831	117/10650	0.34188	1.98854	4.89894	6.05657e-06	0.000376568	0.00029729	268934/12286/104110/11512/243961/16438/108068/14806/12289/13385/18797/18806/14823/14812/14799/14805/224129/18796/14695/12288/14683/216456/210274/20511/22063/64337/14678/140919/58234/170483/14814/14810/18750/16440/76257/14800/242607/108071/19057/224997	40
Organismal Systems	Endocrine system	mmu04911	Insulin secretion	32/1831	86/10650	0.372093	2.16428	4.93947	6.93092e-06	0.000376568	0.00029729	104110/72413/11512/12289/208677/18797/208647/11931/98660/224129/11936/12323/140493/18796/20927/12288/56508/14683/19339/11911/68667/12671/20614/84036/16533/16534/14526/231991/18750/16532/16440/20907	32
Organismal Systems	Development and regeneration	mmu04360	Axon guidance	55/1831	181/10650	0.303867	1.76744	4.74484	7.6706e-06	0.000376568	0.00029729	73181/13836/20347/14360/19354/226251/13176/13845/20350/20360/20351/20564/13837/241568/12632/19876/19247/13841/20130/171171/20563/140570/18803/50780/12323/17974/231148/117600/22418/18209/14159/19649/22063/26456/13636/14678/22066/18845/20354/235611/65254/20315/13842/319757/13641/268902/244058/18750/11350/18186/19057/12540/19206/238057/13839	55
Environmental Information Processing	Signaling molecules and interaction	mmu04080	Neuroactive ligand-receptor interaction	101/1831	392/10650	0.257653	1.49864	4.58338	8.65673e-06	0.000376568	0.00029729	268934/14406/14395/14400/11549/16866/21334/108068/14394/18216/20607/14806/64095/243407/54393/12311/14823/239336/19216/21390/14812/57249/18387/12266/14799/67405/18429/213438/18440/14805/15465/114640/242093/319552/15139/436522/232836/14765/216643/11447/14399/13035/100312986/21337/21333/15552/12669/330921/110835/14308/15562/319229/14829/16846/12801/19219/14608/14654/21833/226278/245526/18619/12671/1…	101
Human Diseases	Cardiovascular disease	mmu05414	Dilated cardiomyopathy	36/1831	103/10650	0.349515	2.03295	4.79979	9.94009e-06	0.00038435	0.000303434	20392/18125/21954/16419/16421/104110/11512/21808/21926/54376/13405/12289/244431/17906/319734/54377/13527/140723/20391/192897/17897/224129/16399/12288/56808/14683/59069/53313/16651/110893/12295/12298/16400/11554/16772/12296	36
Environmental Information Processing	Signal transduction	mmu04024	cAMP signaling pathway	64/1831	224/10650	0.285714	1.66186	4.5616	1.34873e-05	0.000469357	0.000370545	74055/223864/21954/19354/333329/104110/11512/16866/12064/12289/243270/54393/12790/56188/208677/238871/18806/208647/14812/14799/18429/11931/98660/20130/224129/15552/12669/11936/11705/12323/14308/15562/233079/12288/56508/14683/11941/19049/19013/53313/14678/18166/12922/109305/18976/170483/14814/80911/22325/14810/14526/20682/20544/434233/231991/11554/208188/242425/18018/14800/18160/20606/12314/19206	64
Organismal Systems	Nervous system	mmu04727	GABAergic synapse	32/1831	91/10650	0.351648	2.04536	4.56315	2.6486e-05	0.00083792	0.000661516	14406/12286/14395/104110/14400/11512/14394/12289/14415/54393/15114/57249/16522/209837/216643/14412/14399/224129/14695/12288/22348/14417/14411/216456/227120/64337/57138/14678/14401/18750/242425/76257	32
Organismal Systems	Sensory system	mmu04742	Taste transduction	32/1831	92/10650	0.347826	2.02313	4.49078	3.40075e-05	0.000986218	0.000778593	268934/244646/12286/14395/104110/11512/14394/54393/18797/20274/353165/387348/110326/14399/630845/15552/387349/387344/18796/57014/387352/387515/14695/353148/18573/12288/64337/12671/546729/242425/16440/11418	32
Human Diseases	Substance dependence	mmu05030	Cocaine addiction	20/1831	48/10650	0.416667	2.42354	4.50386	5.66934e-05	0.00151764	0.00119814	12064/108068/208677/13385/208647/13195/14812/224129/14683/19049/11911/67839/14678/19739/170483/14814/14810/231991/14800/13162	20
Human Diseases	Cardiovascular disease	mmu05410	Hypertrophic cardiomyopathy	33/1831	100/10650	0.33	1.91944	4.20908	8.53389e-05	0.00212128	0.0016747	20392/18125/21954/16419/16421/21808/21926/54376/13405/12289/244431/17906/319734/54377/16193/13527/140723/20391/192897/17897/16399/12288/56808/59069/53313/16651/110893/12295/19079/12298/16400/16772/12296	33
Organismal Systems	Circulatory system	mmu04261	Adrenergic signaling in cardiomyocytes	46/1831	156/10650	0.294872	1.71512	4.09977	9.34229e-05	0.00216741	0.00171111	223864/21954/17896/19094/104110/11512/11549/54376/12043/12289/208677/18797/208647/17906/319734/11931/54377/140723/98660/17897/224129/11936/12323/18796/269643/12288/56508/56808/14683/11941/59069/53313/11911/14678/110893/12295/12298/20544/434233/231991/11554/18750/26416/11609/12296/12314	46
Human Diseases	Substance dependence	mmu05033	Nicotine addiction	17/1831	40/10650	0.425	2.47201	4.24983	0.000151217	0.00328896	0.00259655	14406/12286/14395/14400/14394/14812/57249/14799/216643/14399/22348/14401/140919/170483/14814/14810/14800	17
Environmental Information Processing	Signal transduction	mmu04010	MAPK signaling pathway	75/1831	299/10650	0.250836	1.45899	3.66804	0.000298678	0.00611412	0.00482693	17532/18595/13836/12290/16002/19354/19094/12286/18205/72349/20111/21808/12064/21926/54376/12289/17260/14178/319734/76089/14164/54377/15234/26403/140723/11600/20130/71751/20112/12291/109689/330177/19259/12288/56808/14172/13645/19099/11911/19395/21813/19419/233046/15370/13636/14180/12295/26399/21802/18218/14257/26407/269881/23939/21937/12298/381921/18750/13869/14183/240672/17762/26416/67071/18018/1…	75
Environmental Information Processing	Signaling molecules and interaction	mmu04517	IgSF CAM signaling	75/1831	300/10650	0.25	1.45412	3.63541	0.000332753	0.00643322	0.00507886	192167/140721/14360/17196/15170/19094/13176/216963/63955/20273/239857/76965/12805/331461/245537/76787/20564/241568/16485/228785/76089/19876/19247/11735/16818/74053/16536/16492/20563/239250/18803/319504/22153/17974/238564/66797/67703/13384/53857/60367/117600/18858/17136/71960/21367/19649/83964/53321/18845/327814/19303/245446/269116/22325/100043314/386750/67374/225825/268902/116837/22152/19283/1875…	75
Organismal Systems	Endocrine system	mmu04928	Parathyroid hormone synthesis, secretion and action	35/1831	116/10650	0.301724	1.75498	3.72524	0.000382985	0.00701467	0.00553789	14462/12575/104110/11512/16438/12043/208677/238871/18797/18806/208647/17260/74499/224129/109689/20505/18796/14683/20393/11911/20181/16801/14678/12393/17391/69847/231991/17388/20183/13081/18750/16440/16478/15200/16973	35
Organismal Systems	Endocrine system	mmu04925	Aldosterone synthesis and secretion	32/1831	104/10650	0.307692	1.78969	3.68739	0.000457028	0.00795229	0.00627813	104110/11512/16438/12289/208677/18797/208647/207728/13070/11931/11908/98660/224129/12291/12323/18796/12288/14683/11941/11911/223604/15370/269060/109305/18976/16527/13079/231991/18750/16440/18160/12314	32
Organismal Systems	Digestive system	mmu04971	Gastric acid secretion	25/1831	75/10650	0.333333	1.93883	3.71764	0.000500243	0.00828974	0.00654453	104110/11512/16438/18797/228785/11931/246133/98660/224129/208890/12323/18796/238564/16516/14683/20535/110895/14678/12671/11944/20544/18750/16440/20606/12314	25
Organismal Systems	Immune system	mmu04658	Th1 and Th2 cell differentiation	28/1831	88/10650	0.318182	1.8507	3.65119	0.000559038	0.00884296	0.00698129	14462/19094/12399/16818/18803/14960/14998/12502/14999/12500/16450/270118/19668/13389/16184/16159/22637/12501/16161/13388/26416/18018/16150/54721/19057/15979/16185/20851	28
Human Diseases	Substance dependence	mmu05032	Morphine addiction	29/1831	93/10650	0.311828	1.81375	3.59127	0.000650735	0.0098459	0.00777308	14406/12286/14395/104110/14400/11512/14394/54393/238871/207728/16524/57249/16522/216643/14399/224129/109689/14695/18573/22348/14683/64337/14678/14401/241489/14772/18750/242425/18390	29
Human Diseases	Substance dependence	mmu05031	Amphetamine addiction	23/1831	69/10650	0.333333	1.93883	3.56482	0.000826614	0.0115347	0.00910637	12289/208677/208647/13195/14812/14799/224129/12323/12288/14683/19049/11911/170483/14814/14810/434233/231991/18750/14800/12314/19057/20907/13162	23
Environmental Information Processing	Signal transduction	mmu04310	Wnt signaling pathway	47/1831	175/10650	0.268571	1.56214	3.41648	0.000828644	0.0115347	0.00910637	73181/19354/17127/27373/12445/21887/207742/18797/74499/22402/208846/93840/22423/21886/12323/21415/18796/408191/20671/192199/22418/22420/20379/77583/114606/13380/54630/13542/22408/11789/23805/14370/54612/229658/16842/106042/216795/21416/56811/18750/27412/18018/19057/22416/21402/56438/16973	47
Human Diseases	Endocrine and metabolic disease	mmu04934	Cushing syndrome	44/1831	162/10650	0.271605	1.57979	3.3882	0.000931496	0.0124677	0.00984294	12575/104110/11512/16438/12289/208677/18797/208647/13070/12567/16492/17283/22423/224129/12291/12323/21415/18796/12288/14683/242705/22418/22420/11911/15370/13542/22408/14678/241489/12922/109305/11789/13074/23805/18976/16527/14370/13079/231991/16842/216795/21416/16440/22416	44
Organismal Systems	Endocrine system	mmu04921	Oxytocin signaling pathway	42/1831	154/10650	0.272727	1.58632	3.33941	0.00110063	0.0141859	0.0111994	73181/12575/104110/11512/16438/54376/230103/12289/18797/17260/13629/16524/319734/228785/16522/18429/54377/140723/224129/12323/18796/54720/238564/12288/56808/14683/14678/12295/18127/19079/23939/28240/12298/434233/18750/16440/18018/12296/18160/12314/19057/20190	42
Organismal Systems	Immune system	mmu04659	Th17 cell differentiation	31/1831	105/10650	0.295238	1.71725	3.36536	0.00119832	0.0148934	0.0117579	19401/14462/19094/17127/15516/19885/16818/12394/16193/18803/15251/14960/14998/12502/14999/12500/21813/20181/16184/22637/12501/16161/20183/26416/18018/16150/54721/19057/15979/16185/20851	31
Organismal Systems	Endocrine system	mmu04929	GnRH secretion	21/1831	63/10650	0.333333	1.93883	3.40534	0.00136939	0.0164327	0.0129732	16866/16438/12289/54393/18797/20750/16524/16522/12291/109689/140493/18796/12288/22063/22066/84036/280287/16534/18750/242425/16440	21
Human Diseases	Cancer: overview	mmu05200	Pathways in cancer	121/1831	549/10650	0.220401	1.28196	3.09086	0.00158616	0.0178095	0.0140601	18595/269608/14866/19401/16002/19354/14633/12575/23928/13176/17127/104110/11512/21808/12445/15516/12043/18797/18806/19216/19765/16782/14178/225884/50868/12386/16480/14164/12394/12385/16193/15234/12567/16775/22033/18803/12828/22423/12190/15251/224129/12323/16399/21415/18796/15974/14695/14683/14172/242705/19219/15213/13645/22418/59069/22420/19395/21813/19419/233046/64337/16450/20181/16801/13542/224…	121
Organismal Systems	Endocrine system	mmu04927	Cortisol synthesis and secretion	23/1831	72/10650	0.319444	1.85805	3.32862	0.00158648	0.0178095	0.0140601	104110/11512/16438/12289/208677/18797/208647/13070/16492/224129/12291/18796/12288/14683/11911/15370/109305/13074/18976/16527/13079/231991/16440	23
Environmental Information Processing	Signal transduction	mmu04350	TGF-beta signaling pathway	32/1831	112/10650	0.285714	1.66186	3.20835	0.00182848	0.0193323	0.0152624	21815/50765/17131/320202/13590/269275/17127/21808/21926/15216/13179/20185/11705/15902/22041/15903/21813/14313/224109/207596/69585/71775/20481/18741/244058/13732/15904/11481/238057/21402/12161/56438	32
Organismal Systems	Nervous system	mmu04721	Synaptic vesicle cycle	24/1831	77/10650	0.311688	1.81293	3.26205	0.00184914	0.0193323	0.0152624	235415/104245/12286/56216/108124/14412/13429/20979/22348/14411/19339/20511/76252/240332/12890/20614/140494/140919/225644/116837/242607/20907/13162/103967	24
Environmental Information Processing	Signal transduction	mmu04390	Hippo signaling pathway	42/1831	158/10650	0.265823	1.54616	3.15141	0.00188879	0.0193323	0.0152624	17131/14633/217325/17127/27373/21808/12445/23859/13385/50523/12386/14164/12385/170788/22423/11705/21415/269643/15902/22418/22420/21813/54401/13542/22408/11789/23805/18787/14370/22062/434233/16842/104318/216795/21416/21677/21679/22416/53310/238057/12161/18016	42
Human Diseases	Cancer: specific types	mmu05226	Gastric cancer	40/1831	150/10650	0.266667	1.55106	3.09701	0.00224458	0.0223175	0.0176191	12575/17127/21808/12043/20416/14178/12386/16480/14164/12385/15234/22423/21415/14172/242705/13645/22418/12591/22420/21813/271849/20181/13542/22408/20418/14180/11789/23805/14370/18671/16842/216795/21416/20183/27412/14183/22416/21748/13866/16973	40
Metabolism	Carbohydrate metabolism	mmu00030	Pentose phosphate pathway	13/1831	34/10650	0.382353	2.22395	3.25696	0.00283956	0.0274491	0.0216703	100198/21881/66681/110208/56421/230163/75731/18642/232449/14120/72157/14751/66646	13
Organismal Systems	Endocrine system	mmu04915	Estrogen signaling pathway	36/1831	134/10650	0.268657	1.56264	2.98639	0.00316744	0.0279114	0.0220353	19401/16667/104110/11512/15516/14229/16438/12043/54393/208677/20416/18797/208647/16524/16522/224129/18796/16669/14683/11911/271849/94179/14678/20418/16664/18127/21802/18976/17395/231991/242425/16440/12314/18390/15200/18753	36
Metabolism	Carbohydrate metabolism	mmu00010	Glycolysis / Gluconeogenesis	21/1831	67/10650	0.313433	1.82308	3.07939	0.00321723	0.0279114	0.0220353	66681/13806/16828/56421/13808/15275/226265/12183/230163/13807/18642/68738/14120/72157/73458/14751/16832/11669/235339/212032/18746	21
Organismal Systems	Nervous system	mmu04720	Long-term potentiation	21/1831	67/10650	0.313433	1.82308	3.07939	0.00321723	0.0279114	0.0220353	223864/20111/16438/18797/14812/14799/20112/12323/18796/12288/11911/14814/14810/434233/18750/16440/67071/14800/108071/12314/19057	21
Environmental Information Processing	Signal transduction	mmu04022	cGMP-PKG signaling pathway	44/1831	172/10650	0.255814	1.48794	2.93955	0.00332604	0.0279114	0.0220353	73181/333329/104110/72413/11512/11549/22323/16438/230103/12289/208677/18797/208647/207728/17260/228785/11931/98660/22333/224129/11936/18796/238564/12288/11941/53313/11911/14886/14678/110893/12062/18127/16533/434233/231991/11554/11739/16532/16440/18018/18160/12314/19057/385643	44
Organismal Systems	Circulatory system	mmu04260	Cardiac muscle contraction	26/1831	89/10650	0.292135	1.6992	3.0181	0.00336862	0.0279114	0.0220353	21954/17896/54376/12289/17906/319734/11931/54377/140723/98660/17897/11936/236727/12288/12373/56808/59069/53313/110893/12295/12298/20544/12296/12857/12865/65973	26
Environmental Information Processing	Signaling molecules and interaction	mmu04512	ECM-receptor interaction	26/1831	89/10650	0.292135	1.6992	3.0181	0.00336862	0.0279114	0.0220353	16419/12834/23928/21960/16421/21827/20750/12840/16782/12833/16775/192897/12828/16399/12824/68553/11603/12842/12845/81877/12830/16400/16772/231470/16774/15530	26
Cellular Processes	Cellular community - eukaryotes	mmu04510	Focal adhesion	50/1831	202/10650	0.247525	1.43973	2.87495	0.00378953	0.0306687	0.0242122	18595/14360/16419/19354/12834/23928/13730/21960/16421/22323/12445/12043/21827/20416/20750/12840/17906/16782/228785/12833/17898/15234/64099/16775/192897/12828/16399/12824/68553/238564/70549/13645/12842/12845/271849/20418/19303/12389/14257/22325/81877/12830/16400/434233/18750/16772/16774/12540/330662/13866	50
Organismal Systems	Endocrine system	mmu04922	Glucagon signaling pathway	29/1831	104/10650	0.278846	1.62191	2.90394	0.00429898	0.034001	0.0268429	16438/208677/16828/56421/18797/208647/19309/12323/18796/245509/14683/12894/19013/11911/110095/18642/12895/14120/100705/19079/14526/16832/17691/231991/78070/16440/18746/12314/19057	29
Human Diseases	Cancer: overview	mmu05205	Proteoglycans in cancer	50/1831	204/10650	0.245098	1.42561	2.79668	0.00466788	0.0355231	0.0280446	17532/74055/16002/16419/12575/15170/19094/723893/387144/21808/16438/21926/69253/19247/11735/15234/13179/20130/545291/18803/22423/15251/12323/83383/15430/12842/22418/22420/16801/22408/19303/12389/14370/22325/319757/17395/20544/434233/216795/18750/13869/16440/26416/16147/15530/12540/15200/19206/22416/13866	50
Organismal Systems	Nervous system	mmu04728	Dopaminergic synapse	36/1831	137/10650	0.262774	1.52842	2.83639	0.00469558	0.0355231	0.0280446	19094/12286/16438/12289/208677/18797/208647/13195/14812/16524/14799/16522/224129/12323/109689/18796/269643/14695/12288/14683/20265/19049/68566/11911/64337/14678/13490/434233/231991/18750/16440/26416/14800/12314/19057/13162	36
Metabolism	Carbohydrate metabolism	mmu00500	Starch and sucrose metabolism	13/1831	36/10650	0.361111	2.1004	3.01336	0.00505104	0.0373992	0.0295257	66681/545562/69983/15275/19309/232714/11722/110095/18605/72157/14387/14751/212032	13
Human Diseases	Endocrine and metabolic disease	mmu04933	AGE-RAGE signaling pathway in diabetic complications	28/1831	101/10650	0.277228	1.61249	2.81803	0.00541922	0.0384875	0.0303849	74055/19094/17127/21808/21926/12043/18797/16193/12567/18799/18803/12828/18802/18796/13058/12842/21813/18127/18787/12830/18750/21824/26416/18018/14066/12540/18753/20851	28
Organismal Systems	Digestive system	mmu04976	Bile secretion	28/1831	101/10650	0.277228	1.61249	2.81803	0.00541922	0.0384875	0.0303849	106407/104110/11512/232156/11931/76971/98660/552899/330962/64008/224129/11936/20494/319229/14683/20535/638251/94215/20181/333669/12780/625716/11826/108096/18671/231396/20544/76408	28
NA	NA	mmu04518	Integrin signaling	39/1831	153/10650	0.254902	1.48264	2.73982	0.00584881	0.0407077	0.0321377	18595/16419/19354/12834/23928/21960/16421/12445/21827/20750/12840/16782/225341/12266/12833/15234/64099/16775/192897/12828/110829/16399/17974/12824/68553/70549/13645/12842/12845/19303/14257/81877/12830/16400/16772/231470/16774/12540/13866	39
Human Diseases	Infectious disease: parasitic	mmu05142	Chagas disease	28/1831	103/10650	0.271845	1.58118	2.70057	0.007237	0.0493819	0.0389857	19094/14676/21808/21926/18797/12266/16193/21899/18796/269643/108802/14683/12502/12500/21813/15977/14678/12062/18787/16159/12317/12501/21937/26416/16150/12262/15979/385643	28

## Sheet: Data S5
Data S5. Enrichment of transcriptional regulator binding sites for Dnmt1tet/tet hypermethylated promoter DMRs using the mouse ReMap ChIP-seq catalog (related to Figure 4)
Category	Number of overlaps	Random average	Mapped peaks ratio	Effect size	p-value significance threshold	p-value	q-value significance threshold	q-value	e-value significance threshold	e-value
GSE101681.HDAC1.hemogenic-endothelium_lox	2770	618.308	0.427865	2.16349	872.226	0	868.563	0	868.485	0
GSE74641.TCF7.thymocyte_Sox13-Low	2922	692.989	0.238394	2.07605	860.708	0	857.083	0	856.967	0
GSE99847.E2F1.mESC	2838	710.948	0.353513	1.99706	784.969	0	781.379	0	781.228	0
GSE99847.E2F1.mESC_2i	3033	814.406	0.330716	1.89693	770.991	0	767.433	0	767.25	0
GSE52648.GRHL3.skin_imiquimod	2000	382.752	0.039847	2.38552	736.539	0	733.012	0	732.799	0
GSE123324.UBTF.bone-marrow_premalignant	2856	759.72	0.269867	1.91046	734.664	0	731.165	0	730.924	0
GSE129333.CREBBP.mESC_100	3048	900.983	0.299058	1.75829	683.383	0	679.909	0	679.642	0
GSE119782.TEAD1.fibroblast	2711	740.867	0.195472	1.87154	674.271	0	670.822	0	670.531	0
GSE101202.XBP1.liver_Ern1-LKO	3299	1105.34	0.208996	1.57753	616.409	0	612.984	0	612.668	0
GSE123324.UBTF.bone-marrow_malignant	3085	1012.93	0.185063	1.60673	594.705	0	591.302	0	590.964	0
GSE37151.SMARCA4.neural-tube	3977	1530.94	0.0912156	1.37726	588.943	0	585.562	0	585.203	0
GSE132054.RAD21L.spermatocyte_PD	2943	961.83	0.285922	1.61343	571.428	0	568.066	0	567.687	0
GSE99530.KMT2B.mESC_WT	2662	842.134	0.279182	1.66039	542.628	0	539.286	0	538.888	0
GSE77334.HES1.BMDM	2158	588.683	0.332358	1.87413	538.426	0	535.102	0	534.685	0
GSE78708.KMT2D.mESC_shMEN1	2348	696.925	0.300602	1.75236	524.005	0	520.699	0	520.265	0
GSE95533.NCOR1.preadipocyte_4h	3182	1166.57	0.0518385	1.44766	513.776	0	510.487	0	510.036	0
GSE56981.ATRX.mESC_d0	2627	856.555	0.291113	1.6168	512.104	0	508.831	0	508.363	0
GSE129333.EZH2.mESC_100	2716	913.028	0.287712	1.57275	505.27	0	502.013	0	501.529	0
GSE53936.KDM4C.mESC	3691	1491.52	0.181073	1.30722	499.591	0	496.349	0	495.85	0
GSE63380.BACH2.CD4_KO	3122	1163.88	0.193432	1.42352	489.824	0	486.597	0	486.083	0
GSE81488.SOX9.testis	3906	1641.8	0.158671	1.25041	489.268	0	486.055	0	485.527	0
GSE74641.TCF7.thymocyte_DP	1324	253.385	0.339923	2.3855	488.399	0	485.2	0	484.658	0
GSE93953.TOX.CD8-pos	2092	600.905	0.283546	1.79967	488.233	0	485.048	0	484.493	0
GSE126568.IKZF1.leukemia_1d	2371	746.002	0.242781	1.66824	487.393	0	484.221	0	483.653	0
GSE85172.IRF4.Th2	5470	2694.45	0.0735531	1.02155	478.995	0	475.835	0	475.254	0
GSE96033.LMNB1.NmuMG_12h	2070	600.059	0.272189	1.78646	477.257	0	474.109	0	473.516	0
GSE129333.EP300.mESC_100	2928	1067.9	0.24398	1.45514	477.126	0	473.99	0	473.385	0
GSE111146.EZH2.testis_d0	3005	1114.79	0.0731108	1.43059	475.567	0	472.443	0	471.826	0
GSE115287.ZFP982.F9	2490	826.583	0.145156	1.59091	472.481	0	469.368	0	468.741	0
GSE44672.MYC.pancreas	2508	847.366	0.146487	1.56548	463.098	0	459.997	0	459.358	0
GSE74641.TCF7.thymocyte_Sox13-High	1066	170.353	0.413499	2.64561	462.63	0	459.539	0	458.889	0
GSE119177.SMARCA4.testis_P18	3848	1651.44	0.168174	1.22039	462.013	0	458.932	0	458.272	0
GSE118115.SUZ12.mESC_KO	2722	970.176	0.0997837	1.48835	461.125	0	458.054	0	457.384	0
GSE118115.SUZ12.mESC	2751	987.61	0.0982009	1.47794	460.475	0	457.414	0	456.734	0
GSE78708.KMT2D.mESC_halo	3118	1202.89	0.231822	1.37412	460.39	0	457.339	0	456.65	0
GSE95055.DPPA4.3T3	3510	1449.7	0.19357	1.27572	455.489	0	452.448	0	451.749	0
GSE100405.HMGA1_DBD-mut.NPC_mut	3604	1512.24	0.176745	1.25291	453.176	0	450.144	0	449.435	0
GSE108945.SPI1.AML_restoration-D0	1716	448.945	0.302379	1.93444	451.461	0	448.438	0	447.72	0
GSE37151.SMARCA4.limb	2759	1004.5	0.147936	1.45767	451.047	0	448.034	0	447.307	0
GSE52071.KMT2B.mESC_LIF	4660	2205.68	0.0682084	1.07911	450.152	0	447.147	0	446.412	0
GSE77334.HES1.BMDM_LPS-1h	1900	543.173	0.316192	1.80652	446.423	0	443.427	0	442.683	0
GSE100405.HMGA2_DBD-mut.NPC_mut	4041	1803.75	0.143034	1.16371	446.282	0	443.294	0	442.541	0
GSE52123.GATA4.heart	3375	1388.57	0.115341	1.28129	441.381	0	438.402	0	437.641	0
GSE101202.XBP1.liver	3389	1397.54	0.151518	1.27797	441.208	0	438.237	0	437.468	0
GSE123324.UBTF.bone-marrow	2887	1105.93	0.204404	1.38431	431.896	0	428.933	0	428.156	0
GSE103198.CTCF.3T3-L1	3526	1500.93	0.0487812	1.23218	430.7	0	427.744	0	426.959	0
GSE103685.SUZ12.mESC_SUZ12-deltaVEFS	1550	388.915	0.1449	1.99474	428.956	0	426.008	0	425.215	0
GSE122830.MTA2.mESC	3657	1589.15	0.0688415	1.2024	427.927	0	424.987	0	424.187	0
GSE60699.HEY2.CM7-1_mESC_Dox	3488	1482.94	0.0610591	1.23394	427.141	0	424.208	0	423.401	0
GSE108634.NR3C1.MEF_tetra	2923	1136.68	0.154836	1.36262	425.525	0	422.6	0	421.785	0
GSE118399.RNF2.TSC_VP160	2215	729.959	0.2756	1.60142	425.232	0	422.314	0	421.492	0
GSE90893.POU5F1.MEF_OtetO	4083	1885.08	0.0963472	1.115	418.184	0	415.273	0	414.443	0
GSE132054.CTCF.spermatocyte_PD	2209	735.298	0.091713	1.58699	417.664	0	414.759	0	413.923	0
GSE132752.SUZ12.mESC_PRC1C-KO_TAM	2324	802.216	0.19213	1.53455	415.018	0	412.121	0	411.278	0
GSE44942.ATF4.fibroblast_Thapsigargin	2036	645.651	0.238603	1.65691	414.082	0	411.191	0	410.342	0
GSE95055.DPPA4.P19	3240	1349.01	0.0839683	1.26409	413.969	0	411.085	0	410.228	0
GSE128767.RUNX1.ovary_E14-5	3560	1552.77	0.174638	1.19704	413.381	0	410.503	0	409.64	0
GSE70486.SMAD2-3.EBs_activin_Trp53-KO	3088	1260.34	0.120592	1.29286	410.382	0	407.51	0	406.641	0
GSE78708.KMT2D.mESC_mCXXC	2113	694.181	0.259934	1.60591	407.668	0	404.803	0	403.927	0
GSE131014.ZIC2.mESC_Zfp281-KO_32h	3221	1347.75	0.115689	1.25696	407.522	0	404.663	0	403.782	0
GSE73769.HDAC2.heart_heto	2315	811.242	0.254088	1.51281	403.528	0	400.676	0	399.788	0
GSE135762.SUZ12.mESC	2481	906.55	0.188012	1.45246	403.342	0	400.495	0	399.601	0
GSE78708.KMT2D.mESC_KO_halo	1578	425.932	0.357904	1.8894	399.608	0	396.767	0	395.867	0
GSE24841.TET1.mESC_Tet1-N_shScr	3759	1707.49	0.0946637	1.13847	399.57	0	396.735	0	395.829	0
GSE70486.SMAD2-3.EBs_activin_BL6J	2741	1066.71	0.119956	1.36153	398.613	0	395.784	0	394.873	0
GSE127804.SUZ12.mESC_AEBP2-JARID2-KO	2206	756.852	0.133237	1.54335	397.892	0	395.069	0	394.151	0
GSE80280.MBD3.mESC	3413	1489.68	0.0758175	1.19603	395.815	0	392.997	0	392.074	0
GSE80049.SMARCA4.mESC_WT	3191	1348.66	0.11061	1.24248	395.678	0	392.866	0	391.937	0
GSE118399.RNF2.TSC_VP160-noguide	2021	658.664	0.274555	1.61745	394.743	0	391.936	0	391.002	0
GSE115340.TAF2.mESC_siCtrl	2947	1198.64	0.23212	1.29785	394.362	0	391.561	0	390.621	0
GSE125972.ESR1.uterus_Veh-21d	3688	1673.97	0.0525326	1.13957	392.726	0	389.931	0	388.986	0
GSE46123.ESR1.mammary-cell_Dex	3155	1331.11	0.0430711	1.24501	392.628	0	389.838	0	388.888	0
GSE95533.NCOR1.preadipocyte_D0	2436	894.829	0.042462	1.44483	392.514	0	389.729	0	388.773	0
GSE44741.EHF.cornea	1489	389.317	0.333184	1.93533	392.329	0	389.549	0	388.588	0
GSE117287.SIN3A.mESC_spikein	2975	1219.56	0.19201	1.28653	392.085	0	389.31	0	388.344	0
GSE33791.E2F3.MEF	1452	372.203	0.262141	1.96388	391.896	0	389.127	0	388.156	0
GSE118115.EZH2.mESC_KO	1982	641.069	0.0978524	1.6284	391.584	0	388.819	0	387.843	0
GSE83253.CHD4.cerebellum	3181	1349.95	0.0700892	1.23658	391.184	0	388.425	0	387.444	0
GSE96033.LMNB1.NmuMG_8h	2551	965.531	0.150608	1.40167	390.138	0	387.383	0	386.397	0
GSE78708.KMT2D.mESC_shGFP	3001	1239.67	0.221264	1.27548	389.615	0	386.866	0	385.875	0
GSE80280.CHD4.mESC	3545	1586.95	0.0497705	1.15953	389.29	0	386.545	0	385.549	0
GSE49848.KLF4.CGR8_OE	3448	1524.82	0.0810855	1.17712	388.839	0	386.098	0	385.098	0
GSE114047.ESR2.endometrium_ectopic-lesion	4056	1926.85	0.126901	1.07382	388.673	0	385.937	0	384.932	0
GSE125116.SMAD2.EBs_Activin	2654	1031.44	0.0802007	1.36351	386.995	0	384.264	0	383.255	0
GSE49431.EZH2.E14	2753	1094.39	0.170148	1.33087	384.918	0	382.192	0	381.178	0
GSE90893.HDAC1.MEF	4097	1962.91	0.07365	1.06157	384.678	0	381.956	0	380.937	0
GSE89405.EZH2.CD8-pos	1783	543.5	0.160169	1.71395	384.017	0	381.3	0	380.276	0
GSE117287.SIN3A.mESC_ZFP296-KO_C27	3330	1460.4	0.105916	1.18916	382.357	0	379.645	0	378.617	0
GSE125116.SMAD2.mESC	2535	968.146	0.112592	1.38869	381.559	0	378.85	0	377.818	0
GSE112113.HDAC1.mESC_FS2-vec	3254	1413.21	0.190148	1.20324	381.458	0	378.754	0	377.718	0
GSE118399.RNF2.TSC_Airn-KO	1693	500.023	0.306425	1.75952	381.015	0	378.315	0	377.274	0
GSE114047.ESR2.endometrium_eutopic-lesion	3998	1905.54	0.103198	1.06908	380.151	0	377.455	0	376.41	0
GSE61188.MBD3.mESC	2282	822.614	0.123211	1.47201	379.723	0	377.032	0	375.982	0
GSE122715.PCGF1.mESC-E14_RING1-KO	2875	1178.02	0.152374	1.2872	379.32	0	376.633	0	375.579	0
GSE53595.CHD4.pro-B-cell_neg	3139	1348.62	0.0891002	1.21882	376.422	0	373.74	0	372.682	0
GSE118765.SMAD2-3.EBs	2866	1177.2	0.104317	1.28368	376.345	0	373.667	0	372.605	0
GSE101800.ZBTB2.mESC_2i	2556	989.832	0.198926	1.36863	375.195	0	372.52	0	371.454	0
GSE53939.KDM4C.MEF	2628	1033.62	0.235	1.34626	374.903	0	372.232	0	371.162	0
GSE61188.CHD4.mESC	3144	1356.01	0.075677	1.21323	374.002	0	371.336	0	370.262	0
GSE73769.HDAC2.heart_CKO	2135	748.745	0.253262	1.51169	371.85	0	369.188	0	368.11	0
GSE58019.SUZ12.mESC_DRB-0h	3024	1284.94	0.0756	1.23475	371.023	0	368.364	0	367.282	0
GSE58019.SUZ12.mESC_Tripto-3h	3296	1460.06	0.0550949	1.17468	370.437	0	367.782	0	366.696	0
GSE63380.BACH2.CD4	2769	1126.63	0.166057	1.29735	370.42	0	367.769	0	366.679	0
GSE64540.HES5.mESC	1124	241.741	0.173083	2.21711	369.503	0	366.856	0	365.763	0
GSE103685.SUZ12.mESC_EED-KO	1356	345.235	0.271146	1.97371	369.123	0	366.48	0	365.382	0
GSE134583.SPI1.spleen_Stag2-KO	2632	1044.81	0.0965446	1.33292	369.07	0	366.43	0	365.329	0
GSE116603.SUZ12.mESC_EZH1-KO-EZH2Y726D_MG132	2721	1100.62	0.112498	1.30581	368.161	0	365.525	0	364.42	0
GSE132752.EPOP.mESC_TAM	3163	1381.08	0.139456	1.1955	366.685	0	364.053	0	362.945	0
GSE102317.STAT5B.spleen_IN2-del	2697	1090.41	0.156131	1.30649	365.258	0	362.63	0	361.518	0
GSE116855.MED12.sperm	1577	456.14	0.243364	1.78963	365.188	0	362.564	0	361.448	0
GSE112113.HDAC1.mESC	3291	1467.83	0.18916	1.16485	364.458	0	361.837	0	360.718	0
GSE122830.MTA3.mESC	2734	1114.86	0.0878083	1.29415	364.201	0	361.584	0	360.461	0
GSE134583.SPI1.bone-marrow_Stag2-KO	3402	1541.14	0.0800979	1.14239	364.008	0	361.394	0	360.267	0
GSE101800.ZBTB2.mESC	1879	618.05	0.332802	1.60417	362.098	0	359.488	0	358.357	0
GSE134053.SUZ12.mESC_PARETA-OHT	1672	509.195	0.222607	1.71529	360.711	0	358.104	0	356.971	0
GSE64063.WT1.kidney	3052	1321.44	0.0906633	1.20765	360.203	0	357.6	0	356.462	0
GSE127804.SUZ12.mESC	2265	840.32	0.136512	1.4305	358.938	0	356.338	0	355.197	0
GSE122830.MTA1.mESC	2875	1212.03	0.0461944	1.24614	358.533	0	355.937	0	354.793	0
GSE134053.MTF2.mESC_I53S72	2049	717.743	0.160078	1.51338	357.635	0	355.042	0	353.895	0
GSE89929.RNF2.NPC	2103	748.809	0.111642	1.48978	357.329	0	354.739	0	353.589	0
ENCSR000ESJ.UBTF.MEL	1684	519.129	0.175856	1.69773	357.103	0	354.517	0	353.363	0
GSE127804.MTF2.mESC	2280	853.823	0.125185	1.41703	355.494	0	352.91	0	351.753	0
GSE83094.SUZ12.mESC_OHT	2070	734.961	0.181691	1.49389	353.408	0	350.828	0	349.668	0
GSE118399.SMC1A.TSC_CB	3189	1424.4	0.0571915	1.16275	352.111	0	349.535	0	348.371	0
GSE58019.SUZ12.mESC_Tripto-0h	3007	1310.84	0.0482308	1.19783	349.893	0	347.319	0	346.152	0
GSE58019.SUZ12.mESC_DRB-6h	3172	1417.81	0.0631131	1.16173	349.703	0	347.133	0	345.963	0
GSE70486.SMAD2-3.EBs_Trp53-KO	2609	1061.42	0.169879	1.2975	349.204	0	346.637	0	345.464	0
GSE49848.KLF4.mESC	3194	1433.79	0.0560184	1.15553	348.824	0	346.26	0	345.083	0
GSE49848.KLF4.CGR8	2448	968.897	0.111597	1.33719	345.314	0	342.754	0	341.574	0
GSE118399.RNF2.TSC_Kcnq1ot1-KO	2723	1139.79	0.220379	1.25643	344.582	0	342.024	0	340.841	0
GSE66830.SUZ12.mESC_plus-RNase	1713	548.714	0.13829	1.6424	343.627	0	341.073	0	339.887	0
GSE108634.NR3C1.MEF_DEX	2103	766.572	0.161657	1.45596	343.616	0	341.064	0	339.875	0
GSE81204.RAI1.cortex	3680	1768.98	0.0700112	1.05679	342.97	0	340.422	0	339.23	0
GSE101646.PHIP.v6-5_dell-MLL4	3253	1484.26	0.0977346	1.13203	342.615	0	340.069	0	338.874	0
GSE47459.FOXA2.pancreas	4277	2181.7	0.0652618	0.971148	342.577	0	340.035	0	338.837	0
GSE114113.HNF4G.small-intestinal-organoid_EN	2526	1023.36	0.136349	1.30354	340.895	0	338.356	0	337.155	0
GSE61148.SUZ12.thymus_IkL-L	2334	906.645	0.128355	1.36419	340.877	0	338.34	0	337.136	0
GSE101905.POU5F1.MEF_IPSC_GFP-pos	2920	1271.21	0.0916107	1.19976	340.787	0	338.253	0	337.046	0
GSE76823.RYBP.mESC	1889	648.793	0.220936	1.54179	340.437	0	337.907	0	336.697	0
GSE90893.MYC.pre-iPSC	3639	1749.15	0.0641607	1.05688	339.226	0	336.699	0	335.486	0
GSE100405.HMGA1_mut.mESC_mut	4115	2076.66	0.0918917	0.986628	339.132	0	336.607	0	335.392	0
GSE76074.CTCF.bone-marrow_d21	3502	1657.22	0.0454604	1.07941	338.965	0	336.443	0	335.225	0
GSE110093.FOXL2.ovary	3662	1766.91	0.126708	1.05141	338.223	0	335.704	0	334.482	0
GSE83094.RNF2.mESC_OHT	2424	966.423	0.199309	1.32666	337.314	0	334.798	0	333.574	0
ENCSR000EQX.UBTF.CH12-LX	1254	322.79	0.21786	1.95787	337.07	0	334.556	0	333.329	0
GSE61316.MED1.back-skin_TAC	2148	802.244	0.189168	1.42088	336.595	0	334.084	0	332.854	0
GSE99022.KMT2D.mESC_MLL4-KO	2937	1292.9	0.173489	1.18373	334.781	0	332.273	0	331.04	0
GSE53831.MEN1.CD4_secondary	3064	1375.52	0.137221	1.15544	334.659	0	332.153	0	330.918	0
ENCSR000ERX.HCFC1.ES-E14	2871	1251.31	0.127953	1.19811	334.294	0	331.792	0	330.554	0
GSE79227.SMC1A.sperm	3066	1378.96	0.080266	1.15278	333.525	0	331.025	0	329.785	0
GSE132752.SUZ12.mESC_PRC1C-KO	2164	816.223	0.145011	1.40667	333.295	0	330.798	0	329.555	0
GSE117287.CHD4.mESC	2680	1132.23	0.0535711	1.24307	332.918	0	330.424	0	329.177	0
GSE115820.PGR.granulosa-cell	3569	1716.94	0.0566697	1.05568	332.066	0	329.574	0	328.325	0
GSE115767.HCFC1.liver_d0	2572	1070.08	0.187014	1.26517	329.535	0	327.046	0	325.795	0
GSE108634.NR3C1.MEF_DEX_WT	2408	968.656	0.125665	1.31378	329.496	0	327.009	0	325.755	0
GSE40860.RNF2.mESC_shKdm2b	2158	818.768	0.133697	1.39817	328.941	0	326.457	0	325.2	0
GSE64252.KDM4A.mESC	2854	1250.07	0.135879	1.19098	328.874	0	326.392	0	325.133	0
GSE129333.EZH2.mESC_2k	2729	1170.33	0.216364	1.22146	328.762	0	326.283	0	325.021	0
GSE80049.PHF5A.mESC_WT	1370	386.384	0.0900901	1.82607	328.286	0	325.81	0	324.545	0
GSE116603.SUZ12.mESC_resEZH2-KO	3415	1621.25	0.0840264	1.07478	328.088	0	325.614	0	324.347	0
GSE95533.HDAC2.preadipocyte_D0	3817	1896.68	0.0586662	1.00896	327.541	0	325.07	0	323.8	0
GSE101681.HDAC2.hemogenic-endothelium_lox	768	125.849	0.499025	2.60941	326.941	0	324.472	0	323.2	4.94065645841247e-324
GSE53831.MEN1.CD4_primary	3333	1573.65	0.118284	1.08271	324.451	0	321.985	1.03753785626662e-322	320.71	1.94661864461451e-321
GSE101681.HDAC1.hemogenic-endothelium_loxlox	2205	855.948	0.278902	1.36518	322.553	2.96439387504748e-323	320.089	8.14220184346374e-321	318.812	1.54138600189552e-319
GSE49848.KLF5.CGR8	3196	1486.29	0.0647501	1.10456	322.377	3.95252516672997e-323	319.916	1.21243709489442e-320	318.637	2.30857113675781e-319
GSE111433.EZH2.mESC_P132S	1454	435.443	0.244534	1.73947	321.359	4.39718424798709e-322	318.9	1.25813816713473e-319	317.618	2.40941487573047e-318
GSE134053.MTF2.mESC_I53S48	2091	790.535	0.116653	1.40329	320.799	1.59089137960881e-321	318.343	4.54140201000815e-319	317.058	8.74644906898405e-318
GSE125116.SMAD4.EBs_Activin	2966	1338.83	0.0889329	1.14755	320.144	7.17877383407331e-321	317.691	2.03920654664516e-318	316.403	3.94955879659234e-317
GSE100405.HMGA2_mut.mESC_mut	4508	2402.94	0.0616209	0.907685	319.723	1.89424768615534e-320	317.271	5.35232183584031e-318	315.982	1.04246833497273e-316
GSE126400.ISL1.mESC	3385	1618.74	0.0878354	1.06428	319.615	2.424380124143e-320	317.167	6.8122611160189e-318	315.875	1.33423237927088e-316
GSE110950.TFAP2C.TSC	2418	990.438	0.0617167	1.28768	319.555	2.78603617689879e-320	317.109	7.78501708480281e-318	315.814	1.53322507496408e-316
GSE82144.CHD4.B-cell_activated	3887	1966.37	0.0781181	0.983123	318.421	3.79541229135246e-319	315.977	1.05467200345783e-316	314.68	2.0886059275148e-315
GSE73390.SALL4.testis	2133	820.369	0.0514795	1.37854	317.356	4.40621082733661e-318	314.914	1.21771654698815e-315	313.615	2.4247390154044e-314
GSE99009.SOX2.MEF_shUbc9	1871	667.831	0.083875	1.48626	316.861	1.37796736668013e-317	314.422	3.7875024979888e-315	313.12	7.58295457051892e-314
GSE19708.JARID2.mESC	3326	1584.82	0.122199	1.06947	316.799	1.59022537911822e-317	314.362	4.34729190817867e-315	313.058	8.75101109428224e-314
GSE90016.OSR1.kidney_BF_E16-5	2739	1199.43	0.172297	1.1913	315.852	1.40591794483605e-316	313.418	3.82277588740685e-314	312.111	7.73676642212283e-313
GSE51746.MCRS1.mESC	3523	1721.65	0.0787738	1.03302	315.418	3.82206515668301e-316	312.986	1.03368518270564e-313	311.677	2.10328246285697e-312
GSE109712.BRD4.iPSC_Bipo_I_Y-rM0401	2495	1045.23	0.177694	1.25521	315.368	4.28416253194292e-316	312.938	1.15249724777434e-313	311.628	2.35757463014254e-312
GSE67868.RYBP.mesoderm-precursor	1673	559.017	0.228833	1.58147	314.981	1.0454101451071e-315	312.553	2.79741382004441e-313	311.24	5.75289203252631e-312
GSE70872.SMAD4.NSC	1921	700.281	0.182483	1.45585	314.019	9.56873074460998e-315	311.594	2.54702110017655e-312	310.279	5.26567252917487e-311
GSE19365.SUZ12.mESC_Jarid2-shRNA	1775	617.407	0.126569	1.52353	313.624	2.37813323880923e-314	311.201	6.29701351406331e-312	309.883	1.30868672121677e-310
GSE74055.RAD21.mESC	2661	1153.65	0.0576986	1.20576	313.461	3.46264763928241e-314	311.04	9.12092491771346e-312	309.72	1.90549499592863e-310
GSE19365.SUZ12.mESC_SCR-shRNA	2120	818.355	0.111956	1.37326	313.362	4.34123543311493e-314	310.944	1.13759543248565e-311	309.622	2.38898185893647e-310
GSE129526.RAD21.MEF_Wapl-ff	3468	1690.71	0.0448671	1.03648	312.377	4.20103800029823e-313	309.961	1.0951829893722e-310	308.636	0
GSE53595.CHD4.pro-B-cell	2220	880.796	0.0971766	1.33368	311.926	1.18581912485226e-312	309.512	3.07549941387869e-310	308.185	0
GSE70486.SMAD2-3.EBs_BL6J	2484	1044.77	0.167577	1.24948	311.496	3.19379299834431e-312	309.084	8.24104911987145e-310	307.755	0
GSE125116.SMAD2.EBs_SB431542	3063	1420.05	0.102837	1.109	311.242	5.72968553804689e-312	308.832	0	307.501	3.15305e-308
GSE28325.PHF19.mESC_Pcl3-sh7	1876	678	0.12437	1.4683	311.197	6.35660361267593e-312	308.79	0	307.456	3.49804e-308
GSE82144.HDAC2.B-cell_activated	3842	1952.07	0.0532148	0.976849	311.176	6.67258460348978e-312	308.771	0	307.435	3.67192e-308
GSE48763.NIPBL.thymocyte	2211	876.868	0.110705	1.33427	310.906	1.2411252308352e-311	308.503	0	307.166	6.82991e-308
GSE99022.KMT2D.mESC_MLL4-DNT	3279	1568.54	0.0984507	1.06383	309.436	3.66301026388347e-310	307.035	9.21667e-308	305.696	2.01575e-306
GSE75219.FOXN1.thymus	2096	809.893	0.157499	1.37184	309.284	5.20066223839609e-310	306.885	1.30208e-307	305.543	2.86192e-306
GSE111067.ASXL1.bone-marrow_mut	2966	1361.58	0.0955357	1.12324	308.306	0	305.909	1.23191e-306	304.565	2.72109e-305
GSE134053.MTF2.mESC_PAR-72	1843	663.457	0.152667	1.47398	307.776	0	305.382	4.15358e-306	304.035	9.21978e-305
GSE134053.SUZ12.mESC_I53SOHT	1236	338.675	0.256591	1.86771	307.589	2.57635e-308	305.197	6.35598e-306	303.848	1.41777e-304
GSE127804.SUZ12.mESC_JARID2-KO	1749	610.603	0.180533	1.51822	307.239	5.76214e-308	304.849	1.41465e-305	303.499	3.17091e-304
GSE115964.TET2.mESC_parental	3308	1595.15	0.0610546	1.05226	306.163	6.86929e-307	303.775	1.67831e-304	302.422	3.78017e-303
GSE90893.HDAC1.mESC	3968	2053.43	0.0606366	0.950378	305.894	1.27568e-306	303.508	3.10178e-304	302.154	7.02007e-303
GSE95055.DPPA4.mESC-E14	3559	1767.82	0.0562483	1.0095	305.824	1.50091e-306	303.44	3.63196e-304	302.083	8.25953e-303
GSE128182.YY1.cortical-neuron	2940	1349.61	0.0834374	1.12327	305.635	2.31614e-306	303.254	5.57798e-304	301.895	1.27457e-302
GSE90893.KLF4.MEF_KtetO	3954	2044.64	0.0601003	0.951463	305.446	3.57831e-306	303.067	8.57683e-304	301.706	1.96914e-302
GSE115820.PGR.granulosa-cell_PR4	3389	1651.93	0.0747859	1.03671	305.427	3.73983e-306	303.05	8.9217e-304	301.687	2.05803e-302
GSE125047.ZBTB11.mESC	3182	1511.78	0.084316	1.07369	305.287	5.16515e-306	302.911	1.22641e-303	301.546	2.84238e-302
GSE113429.KLF4.mESC_2I	2441	1028.6	0.110114	1.2468	304.995	1.01198e-305	302.621	2.39161e-303	301.254	5.56892e-302
GSE64589.RUNX1T1.floating-progenitor-cell_uninduced	3288	1584.56	0.056875	1.05313	304.769	1.70122e-305	302.398	4.00178e-303	301.029	9.36179e-302
GSE58100.NUCKS1.hepatocyte	3011	1398.53	0.13029	1.10633	304.694	2.024e-305	302.324	4.73902e-303	300.953	1.11381e-301
GSE132752.PCGF6.mESC_TAM	2478	1053.29	0.182005	1.23428	304.196	6.3654e-305	301.829	1.48354e-302	300.456	3.50288e-301
GSE131014.ZIC2.mESC_32h	3290	1587.3	0.0900778	1.05151	304.123	7.53825e-305	301.757	1.74882e-302	300.382	4.1483e-301
GSE33819.CTCF.spleen_biotag_mZF11	3287	1586.98	0.0449756	1.05049	303.321	4.77306e-304	300.958	1.10226e-301	299.581	2.62661e-300
GSE102317.STAT5B.spleen_UP-del	3000	1394.54	0.0839678	1.10517	303.025	9.43081e-304	300.664	2.16799e-301	299.285	5.18977e-300
GSE78264.KDM1A.trophoblast-stem-cell	2515	1078.85	0.141531	1.22106	302.968	1.07741e-303	300.608	2.46558e-301	299.227	5.92897e-300
GSE78708.KMT2D.mESC_KO_vector	1940	727.44	0.218493	1.41516	302.106	7.82544e-303	299.749	1.78274e-300	298.366	4.30634e-299
GSE49178.EZH2.mESC_shGFP	2023	777.202	0.100507	1.38013	301.694	2.02386e-302	299.338	4.58994e-300	297.953	1.11373e-298
GSE90893.KLF4.MEF_KpMx	3626	1824.26	0.070255	0.991064	301.471	3.38086e-302	299.117	7.63327e-300	297.73	1.86049e-298
GSE125047.ZBTB11.mESC_FLAG	3406	1673.36	0.0790751	1.02533	300.985	1.03424e-301	298.634	2.32472e-299	297.245	5.69141e-298
GSE84802.ARID4B.testis	1827	663.375	0.265013	1.46158	300.761	1.73381e-301	298.411	3.87994e-299	297.02	9.54117e-298
GSE74055.MED12.mESC_D1-5_DKO	2403	1012.01	0.168513	1.24761	300.621	2.39208e-301	298.273	5.32943e-299	296.881	1.31636e-297
GSE132054.RAD21L.spermatocyte_RS	2953	1369.05	0.0742146	1.10901	300.14	7.23991e-301	297.794	1.60594e-298	296.4	3.98412e-297
GSE84858.EZH2.colon	3235	1559.09	0.137455	1.05306	299.853	1.4039e-300	297.509	3.1005e-298	296.112	7.72565e-297
GSE125972.ESR1.uterus_8h	3140	1495.2	0.0539324	1.07043	299.665	2.161e-300	297.323	4.75181e-298	295.925	1.1892e-296
GSE45914.SPI1.macrophage_NR1D1-bio	2821	1284.94	0.0837191	1.13451	298.53	2.95396e-299	296.189	6.46732e-297	294.789	1.62557e-295
GSE43275.POU5F1.mESC_Sox2KE	3067	1449.74	0.0511226	1.08104	297.899	1.26191e-298	295.561	2.75088e-296	294.158	6.94429e-295
GSE80049.SMARCA4.mESC_dCD	3134	1495.23	0.112479	1.06763	297.716	1.92198e-298	295.38	4.17181e-296	293.976	1.05767e-294
GSE132752.EPOP.mESC	2924	1355.22	0.124558	1.10942	297.407	3.91616e-298	295.072	8.46402e-296	293.667	2.15506e-294
GSE67520.POU5F1.MEF_d11_sc	3205	1544.93	0.0426384	1.05278	296.949	1.12331e-297	294.617	2.41749e-295	293.209	6.1816e-294
GSE96593.HTATSF1.mESC	3451	1714.57	0.106624	1.00917	296.43	3.71265e-297	294.099	7.95616e-295	292.69	2.04307e-293
GSE87820.SS18.mESC_UNT	2634	1167.78	0.0608174	1.17348	295.908	1.23472e-296	293.579	2.63484e-294	292.168	6.79469e-293
GSE78708.KMT2D.mESC_halo_vector	3160	1516.96	0.171571	1.05875	295.756	1.7538e-296	293.429	3.72679e-294	292.015	9.65116e-293
GSE122715.SUZ12.mESC-E14_PCGF2-4-KO	2353	988.803	0.103107	1.25075	295.695	2.01904e-296	293.369	4.27246e-294	291.954	1.11108e-292
GSE63204.STAT1.CD4-pos_S3-KO	2782	1266.13	0.129311	1.1357	294.975	1.06029e-295	292.651	2.23432e-293	291.234	5.83478e-292
GSE54424.SOX9.back-skin_IFE	1473	472.925	0.145195	1.63907	294.776	1.67622e-295	292.454	3.51759e-293	291.035	9.22423e-292
GSE108634.NR3C1.MEF_DEX_tetra	2862	1320.72	0.0896757	1.1157	294.052	8.87143e-295	291.732	1.854e-292	290.311	4.88195e-291
GSE57700.TET1.mESC_SALL4-het	3866	2010.94	0.0602866	0.942973	293.93	1.17447e-294	291.612	2.44437e-292	290.19	6.46311e-291
GSE134053.MTF2.mESC_PAR-48	1835	677.149	0.139554	1.43823	293.882	1.31071e-294	291.566	2.71673e-292	290.142	7.21281e-291
GSE31221.TCF7.EML	2175	881.204	0.0848185	1.30347	293.78	1.66122e-294	291.465	3.42919e-292	290.039	9.14167e-291
GSE57700.TET1.mESC_SALL4-KO	3689	1886.93	0.0725453	0.967189	293.597	2.5302e-294	291.284	5.20178e-292	289.856	1.39237e-290
GSE101202.XBP1.liver_fasted	3274	1599.58	0.0810396	1.03337	293.44	3.63183e-294	291.129	7.43635e-292	289.699	1.99859e-290
GSE87820.SS18.ZHBTc4_Dox-24h	2654	1187.37	0.0600059	1.1604	292.337	4.60591e-293	290.029	9.35509e-291	288.596	2.53463e-289
GSE87820.SS18.mESC_24hDOX	2654	1187.37	0.0600059	1.1604	292.337	4.60591e-293	290.027	9.39281e-291	288.596	2.53463e-289
GSE102517.KLF4.MEF_d8	2506	1091.8	0.0870441	1.19867	292.291	5.12104e-293	289.985	1.03598e-290	288.55	2.81811e-289
GSE112946.SMAD4.duodenum-epithelium	2952	1384.5	0.116463	1.09233	292.119	7.61109e-293	289.814	1.53357e-290	288.378	4.18838e-289
GSE127804.SUZ12.mESC_EPOP-KO	1579	534.184	0.169712	1.5636	291.754	1.76219e-292	289.451	3.53659e-290	288.013	9.69734e-289
GSE132784.NIPBL.teratocarcinoma	2462	1064.67	0.157932	1.20942	291.707	1.96134e-292	289.407	3.9207e-290	287.967	1.07932e-288
GSE90893.KLF4.MEF_SKpMX	3493	1761.55	0.0684875	0.987623	288.687	2.05714e-289	286.388	4.09602e-287	284.946	1.13205e-285
GSE117287.MBD3.mESC_ZFP296-KO_C27	1896	720.177	0.11662	1.39654	288.675	2.11332e-289	286.378	4.19137e-287	284.934	1.16296e-285
GSE121660.NCOR2.embryonic-cortical-culture_0kcl_a2shrna	2780	1277.12	0.120273	1.12219	288.62	2.40028e-289	286.324	4.74191e-287	284.879	1.32087e-285
GSE125116.SMAD3.mESC	2820	1303.98	0.0896348	1.11277	288.427	3.74105e-289	286.133	7.36193e-287	284.686	2.0587e-285
GSE92846.KLF4.mESC_asynchronous	2415	1040.95	0.0885783	1.21412	288.12	7.58253e-289	285.828	1.48637e-286	284.38	4.17267e-285
GSE67944.BRD2.mESC_H2AZ-YFP	3432	1721.33	0.0767082	0.99553	287.745	1.80023e-288	285.454	3.51528e-286	284.004	9.90667e-285
GSE92407.KLF4.mESC_serum	2198	905.572	0.0987288	1.27929	287.391	4.06364e-288	285.102	7.90448e-286	283.65	2.23622e-284
GSE102784.SMAD4.EBs_ab40759	2639	1187.87	0.0765771	1.15162	286.844	1.43148e-287	284.557	2.77382e-285	283.104	7.87746e-284
GSE99009.SOX2.MEF_shCTRL	2033	806.786	0.0962549	1.33335	285.701	1.99057e-286	283.415	3.84245e-284	281.96	1.09541e-282
GSE80034.GTF3C1.mESC_shNcaph2	3109	1504.45	0.159256	1.04721	285.416	3.83497e-286	283.132	7.37459e-284	281.676	2.11038e-282
GSE113429.KLF4.mESC_d3	2584	1155.01	0.0851092	1.1617	285.239	5.77312e-286	282.956	1.10596e-283	281.498	3.17695e-282
GSE84899.CREBBP.EpiSC	2676	1215.59	0.1115	1.13843	285.01	9.77999e-286	282.729	1.86648e-283	281.269	5.38193e-282
GSE67944.BRD2.mESC_K3R3-YFP	3462	1749.91	0.070273	0.984325	284.438	3.64525e-285	282.159	6.9307e-283	280.698	2.00598e-281
GSE134583.SPI1.spleen	3290	1630.77	0.0983822	1.01254	284.374	4.22199e-285	282.097	7.9972e-283	280.634	2.32336e-281
GSE72164.RNF2.mESC_2i	2039	813.145	0.118087	1.32628	283.92	1.20211e-284	281.644	2.26851e-282	280.179	6.61522e-281
GSE109712.BRD4.iPSC_Mull_M_Y-263-08	3071	1482.34	0.0993208	1.05084	283.684	2.06918e-284	281.41	3.89025e-282	279.944	1.13867e-280
GSE130091.KMT2D.brown-preadipocyte_vec_4OHT	2841	1328.93	0.0656181	1.09614	282.942	1.14243e-283	280.67	2.13992e-281	279.202	6.28678e-280
GSE99022.KMT2D.mESC_MLL4-DSET	2212	921.73	0.124416	1.26293	282.822	1.50653e-283	280.551	2.81151e-281	279.081	8.29041e-280
GSE63204.STAT1.CD4-pos_S3-KO_IL21	3043	1465.46	0.110418	1.05414	282.686	2.06024e-283	280.417	3.83073e-281	278.945	1.13375e-279
GSE81299.KDM4A.MLL-AF9_ctrl	1796	670.761	0.193743	1.42092	281.785	1.64055e-282	279.517	3.0392e-280	278.044	9.02795e-279
GSE43275.POU5F1.mESC	3072	1488	0.0440115	1.04581	281.371	4.2533e-282	279.105	7.85068e-280	277.631	2.34059e-278
GSE118765.SMAD2-3.pancreas_RREB1_KO	1931	751.677	0.177319	1.36116	281.294	5.07915e-282	279.03	9.34093e-280	277.554	2.79506e-278
GSE132752.PCGF6.mESC	2475	1092.11	0.149973	1.18032	281.009	9.79718e-282	278.746	1.79524e-279	277.268	5.39139e-278
GSE24841.SIN3A.mESC_SCruz	2101	856.078	0.133941	1.29526	280.767	1.70944e-281	278.506	3.1211e-279	277.027	9.40707e-278
GSE76074.RUNX2.bone-marrow_d21	3597	1854.07	0.0505779	0.956095	280.472	3.37247e-281	278.212	6.13528e-279	276.731	1.85587e-277
GSE37151.SMARCA4.forebrain	3528	1806.35	0.0714358	0.965769	280.131	7.39364e-281	277.873	1.34025e-278	276.391	4.06872e-277
GSE94300.MTF2.mESC_E4	1348	423.133	0.171131	1.67164	278.97	1.07066e-279	276.714	1.93386e-277	275.23	5.89182e-276
GSE88769.BRD4.mESC	2585	1168.01	0.10518	1.14611	278.66	2.18655e-279	276.405	3.93536e-277	274.92	1.20326e-275
GSE74055.RAD21.mESC_D1-5_DKO	2285	974.799	0.0668911	1.22902	278.579	2.63786e-279	276.325	4.73079e-277	274.838	1.45161e-275
GSE56813.GTF2B.heart_normal	2384	1039.21	0.112863	1.19789	277.841	1.44287e-278	275.589	2.57853e-276	274.1	7.94011e-275
GSE80669.REPIN1.lymph-node_DZ	2395	1047.89	0.166736	1.19253	276.934	1.16345e-277	274.684	2.07186e-275	273.194	6.40245e-274
GSE129526.RAD21.MEF	2766	1291.2	0.0424826	1.09908	276.834	1.46528e-277	274.587	2.59111e-275	273.093	8.06344e-274
GSE88991.TCF3.NSC_E12-KO	2910	1387.82	0.0646265	1.0682	276.836	1.46032e-277	274.586	2.5914e-275	273.095	8.03612e-274
GSE117287.CHD4.mESC_ZFP296-KO_C27	1891	734.696	0.0661304	1.36393	276.473	3.36675e-277	274.227	5.93281e-275	272.732	1.85272e-273
GSE77093.RNF2.mESC_E861K	1562	543.091	0.169783	1.52413	276.422	3.78097e-277	274.178	6.63961e-275	272.682	2.08067e-273
GSE70486.TCF3.EBs	3565	1841.68	0.0563503	0.952878	276.321	4.77247e-277	274.078	8.35174e-275	272.581	2.62629e-273
GSE99818.LHX2.retinal-progenitor	2493	1113.22	0.0720374	1.16314	275.863	1.37205e-276	273.621	2.39279e-274	272.122	7.55042e-273
GSE51004.MYC.fibroblast_OHT-4h	2944	1412.98	0.070586	1.05904	275.808	1.55499e-276	273.568	2.7025e-274	272.068	8.55711e-273
GSE79561.EP300.motor-neuron_d5	2267	968.24	0.169015	1.22735	275.746	1.79578e-276	273.507	3.11029e-274	272.005	9.88215e-273
GSE64425.MYCN.tumorspheres_SHH	1271	386.884	0.128241	1.71599	274.898	1.26485e-275	272.661	2.18325e-273	271.157	6.96046e-272
GSE109712.BRD4.iPSC_Mull_M_N-rCr263-4	3115	1531.61	0.0885421	1.02418	274.888	1.29358e-275	272.653	2.22525e-273	271.148	7.11858e-272
GSE98119.SMC3.B-cell_activated	2794	1314.83	0.057787	1.08746	274.415	3.8502e-275	272.18	6.60075e-273	270.674	2.11876e-271
GSE72069.SMAD2-3.pancreas-cancer	1511	517.18	0.0528988	1.54677	274.218	6.04648e-275	271.986	1.0331e-272	270.478	3.32738e-271
GSE101681.HDAC2.hemogenic-endothelium	1753	656.029	0.262661	1.41799	274.12	7.58716e-275	271.889	1.29198e-272	270.379	4.17521e-271
GSE96033.LMNB1.NmuMG	1551	540.609	0.178645	1.52054	273.397	4.01278e-274	271.167	6.81021e-272	269.656	2.20823e-270
GSE127804.MTF2.mESC_JARID2-KO	1279	393.468	0.181059	1.7007	272.522	3.00757e-273	270.294	5.08718e-271	268.781	1.65507e-269
GSE111067.ASXL1.bone-marrow	3162	1570.16	0.13866	1.00993	272.133	7.3616e-273	269.906	1.24103e-270	268.392	4.05109e-269
GSE40860.RNF2.mESC_shScr	2621	1204.38	0.129113	1.12183	272.072	8.48173e-273	269.846	1.42511e-270	268.331	4.6675e-269
GSE99022.KMT2D.mESC_WT-MLL4	3386	1727.52	0.0690175	0.970879	271.483	3.28651e-272	269.259	5.50376e-270	267.743	1.80857e-268
GSE98754.CDK8.mESC_OHT	1614	579.238	0.153291	1.47841	271.169	6.77656e-272	268.947	1.13109e-269	267.428	3.72914e-268
GSE33819.CTCF.spleen_biotag_mZF9	3320	1682.77	0.0520645	0.980347	270.885	1.30192e-271	268.664	2.16592e-269	267.145	7.16448e-268
GSE83094.RNF2.mESC	2377	1047.21	0.146765	1.18259	270.871	1.346e-271	268.651	2.2319e-269	267.13	7.40701e-268
GSE121660.NCOR2.embryonic-cortical-culture_2kcl_a2shrna	2844	1355.84	0.0831482	1.06874	270.844	1.43106e-271	268.626	2.36519e-269	267.104	7.8751e-268
GSE131014.ZIC2.mESC	2372	1045.22	0.105681	1.18229	270.187	6.50026e-271	267.97	1.07084e-268	266.446	3.57709e-267
GSE134053.PCGF6.mESC_PARETA	1688	623.49	0.183359	1.43688	270.068	8.55576e-271	267.852	1.40488e-268	266.327	4.70824e-267
GSE99101.BRD4.preadipocyte_d2_KO	1549	544.115	0.0412725	1.50935	269.65	2.2372e-270	267.436	3.66167e-268	265.91	1.23113e-266
GSE75039.KDM1A.NSC_KO	2873	1378.16	0.0639155	1.05981	269.553	2.79722e-270	267.341	4.56349e-268	265.813	1.53931e-266
GSE92407.YY1.mESC_2i	3284	1661.43	0.053381	0.98303	269.28	5.2488e-270	267.069	8.53555e-268	265.539	2.88841e-266
GSE82144.SMARCA4.B-cell_activated	3721	1970.89	0.0597847	0.916846	269.058	8.75625e-270	266.848	1.41937e-267	265.317	4.81857e-266
GSE83295.SMARCA4.primary-fibroblast_90min_ANM	2541	1157.79	0.0834181	1.13403	268.895	1.27317e-269	266.687	2.05718e-267	265.155	7.00624e-266
GSE122715.SUZ12.mESC-E14_PCGF3-5-KO	2015	821.784	0.127588	1.29395	268.884	1.30635e-269	266.677	2.10407e-267	265.143	7.18882e-266
GSE80669.REPIN1.lymph-node_LZ	2538	1155.97	0.148691	1.13459	268.812	1.54056e-269	266.607	2.47343e-267	265.072	8.47768e-266
GSE98134.KDM1A.C2C12_myogenic-diff	2344	1032.23	0.11137	1.18321	267.382	4.14773e-268	265.178	6.63827e-266	263.642	2.28249e-264
GSE48020.KLF1.liver_erythroblast	2286	995.232	0.166122	1.19972	267.212	6.13481e-268	265.009	9.78754e-266	263.472	3.37598e-264
GSE140546.YY1.mESC_KO	2729	1286.41	0.0552396	1.08502	267.015	9.65126e-268	264.814	1.53493e-265	263.275	5.31109e-264
GSE115964.TET2.mESC	3653	1927.92	0.0606186	0.922037	266.87	1.35045e-267	264.669	2.14101e-265	263.129	7.4315e-264
GSE77746.SAP130.heart	2973	1452.03	0.206029	1.03385	266.862	1.37544e-267	264.663	2.17381e-265	263.121	7.56903e-264
GSE93755.SPI1.T-cell_OHT-0h	2338	1030.03	0.0801536	1.18259	266.461	3.45728e-267	264.264	5.44706e-265	262.721	1.90254e-263
GSE99101.BRD4.preadipocyte_d7	2804	1338.7	0.0581767	1.06666	266.142	7.20788e-267	263.946	1.1321e-264	262.402	3.9665e-263
GSE67944.BRD4.mESC_H2AZ-YFP	2982	1459.94	0.0888161	1.03037	266.069	8.53834e-267	263.874	1.33691e-264	262.328	4.69865e-263
GSE53233.TCF12.endoderm_SB	2885	1394.58	0.0385273	1.04874	265.678	2.10045e-266	263.484	3.27869e-264	261.937	1.15588e-262
GSE87034.MYC.lung-cancer_PB119	3086	1532.6	0.0925254	1.00976	265.56	2.75153e-266	263.368	4.28176e-264	261.82	1.51417e-262
GSE105007.HOXB5.bone-marrow	2892	1400.31	0.0805683	1.04632	265.231	5.88113e-266	263.04	9.12378e-264	261.49	3.23638e-262
GSE87037.BRD4.retina_N-MDMX	3148	1577.02	0.0807366	0.997235	264.901	1.25643e-265	262.711	1.94323e-263	261.16	6.91415e-262
GSE90893.KLF4.pre-iPSC	3524	1841.76	0.044317	0.936127	264.619	2.40614e-265	262.431	3.71004e-263	260.878	1.3241e-261
GSE54770.NCOA2.prostate	1758	672.593	0.106863	1.38613	264.398	3.99584e-265	262.212	6.14248e-263	260.658	2.19891e-261
GSE88991.TCF3.NSC	2519	1154	0.0720744	1.1262	263.356	4.40229e-264	261.171	6.74678e-262	259.616	2.42258e-260
GSE83094.SUZ12.mESC	1465	504.755	0.161664	1.53725	263.172	6.7285e-264	260.988	1.02807e-261	259.431	3.70269e-260
GSE56813.GTF2B.heart_postnatal	2101	884.955	0.112739	1.2474	263.013	9.70125e-264	260.83	1.47782e-261	259.273	5.3386e-260
GSE135762.RNF2.mESC	2389	1070.29	0.126784	1.15841	262.553	2.79876e-263	260.372	4.25063e-261	258.812	1.54016e-259
GSE98808.ERF.prostate_Dox	2479	1129.32	0.0769135	1.13431	262.495	3.1971e-263	260.315	4.84107e-261	258.755	1.75936e-259
GSE43275.POU5F1.F9	2790	1337.17	0.0381915	1.06108	262.378	4.19003e-263	260.199	6.32564e-261	258.637	2.30578e-259
GSE81081.SINHCAF.mESC	3300	1689.59	0.114195	0.965789	262.162	6.89167e-263	259.984	1.03733e-260	258.421	3.79249e-259
GSE90893.KLF4.MEF_endo	2980	1467.29	0.0907319	1.02216	262.134	7.33795e-263	259.958	1.10123e-260	258.394	4.03808e-259
GSE92407.KLF4.mESC_2i-D3	2936	1437.13	0.0577578	1.03066	262.122	7.54435e-263	259.947	1.12885e-260	258.382	4.15165e-259
GSE42881.EP300.cortex	2322	1027.85	0.08503	1.17574	261.973	1.06439e-262	259.799	1.58793e-260	258.232	5.85732e-259
GSE43229.POU5F1.mESC_KDM4C-KO	2536	1169.17	0.0549441	1.11707	261.346	4.51141e-262	259.173	6.71066e-260	257.605	2.48263e-258
GSE78708.KMT2D.mESC_KO_Y2602A	3116	1565.34	0.150684	0.993222	260.349	4.47298e-261	258.178	6.63398e-259	256.609	2.46148e-257
GSE101320.EZH2.BMDM	2508	1152.66	0.1639	1.12157	260.319	4.79405e-261	258.149	7.08938e-259	256.579	2.63817e-257
GSE79518.KDM1A.pro-B-cell_IL3	2102	890.459	0.130365	1.23914	260.115	7.68134e-261	257.946	1.1326e-258	256.374	4.22704e-257
GSE76303.STAG1.MEF_CTCF-fl	3387	1756.17	0.0506808	0.947573	260.008	9.82582e-261	257.84	1.44458e-258	256.267	5.40715e-257
GSE50590.KDM1A.C2C12_MB	3132	1577.36	0.188641	0.989576	259.966	1.08127e-260	257.8	1.58507e-258	256.225	5.95026e-257
GSE79423.SREBF1.macrophage_KLA24h	4245	2377.65	0.0561813	0.836226	259.721	1.90214e-260	257.556	2.78034e-258	255.98	1.04675e-256
GSE129526.RAD21.MEF_Smc3-ff	2257	990.867	0.0532136	1.18764	259.222	5.9921e-260	257.059	8.73336e-258	255.482	3.29745e-256
GSE55045.CTCF.MC3T3-E1_d0	2872	1400.95	0.039411	1.03565	258.66	2.18657e-259	256.498	3.17773e-257	254.92	1.20327e-255
GSE111433.EZH2.mESC_F145L	1136	333.432	0.264864	1.7685	258.532	2.93817e-259	256.371	4.25778e-257	254.791	1.61688e-255
GSE70486.TCF3.mESC	3545	1872.5	0.0460204	0.920822	258.423	3.77363e-259	256.263	5.45284e-257	254.683	2.07663e-255
GSE61148.CHD4.thymus_DN3	2942	1449.82	0.0774455	1.02092	258.262	5.47455e-259	256.103	7.88812e-257	254.521	3.01265e-255
GSE89929.EZH2.NPC	2609	1225.85	0.099889	1.08972	257.315	4.83731e-258	255.158	6.95013e-256	253.575	2.66197e-254
GSE50934.KDM1A.3T3-L1_d7_Kdm1a-OE	2840	1382.49	0.122567	1.03862	257.103	7.8818e-258	254.947	1.12923e-255	253.363	4.33735e-254
GSE104841.RYBP.EBs_ES-derived	3067	1539.12	0.115675	0.994723	256.977	1.0549e-257	254.822	1.5071e-255	253.236	5.80514e-254
GSE89155.ZIC3.MEF	3023	1508.88	0.0614356	1.00251	256.861	1.37812e-257	254.707	1.96332e-255	253.12	7.58381e-254
GSE126496.SP3.mESC_DNA-Binding	3183	1621.89	0.0957552	0.972712	256.184	6.54324e-257	254.032	9.29554e-255	252.444	3.60074e-253
GSE116603.SUZ12.mESC_resEZH2	3111	1571.63	0.044544	0.985118	256.164	6.85729e-257	254.013	9.71441e-255	252.423	3.77357e-253
GSE42237.SMC1A.limb	2169	940.572	0.0501944	1.20542	255.744	1.80234e-256	253.594	2.54616e-254	252.004	9.91829e-253
GSE89155.ZIC3.MEF_Esrrb	3088	1556.62	0.0580822	0.988255	255.731	1.8595e-256	253.582	2.61959e-254	251.99	1.02328e-252
GSE113429.KLF4.mESC_d6	2579	1209.9	0.0888636	1.09193	255.291	5.11787e-256	253.143	7.18982e-254	251.55	2.81636e-252
GSE67944.BRD4.mESC_K3R3-YFP	3027	1515.86	0.0821505	0.997756	255.03	9.32562e-256	252.884	1.30648e-253	251.29	5.13189e-252
GSE45625.TOP2A.mESC	2199	961.457	0.131096	1.19355	254.813	1.53937e-255	252.667	2.15064e-253	251.072	8.47116e-252
GSE125972.ESR1.uterus_12h	1455	509.896	0.0654256	1.51274	254.376	4.21e-255	252.232	5.86553e-253	250.635	2.31676e-251
GSE117488.RELA.liver_regular-chow	2314	1037.42	0.202114	1.15739	253.978	1.05234e-254	251.835	1.46213e-252	250.237	5.791e-251
GSE105006.BAP1.mESC	2759	1334.11	0.138783	1.04827	253.958	1.10148e-254	251.816	1.52621e-252	250.217	6.06144e-251
GSE49178.EZH2.mESC_shDnmt3l	1739	676.87	0.0732704	1.36131	253.571	2.68793e-254	251.43	3.71423e-252	249.83	1.47917e-250
GSE85172.IRF4.Th2_BATF-KO	2636	1251.73	0.0805476	1.07443	253.546	2.84201e-254	251.407	3.91644e-252	249.806	1.56396e-250
GSE132752.AEBP2.mESC	2356	1065.87	0.0923197	1.14431	253.447	3.56905e-254	251.309	4.90498e-252	249.707	1.96405e-250
GSE115965.TET2.AML_Tet2-KO	2501	1161.84	0.10333	1.1061	253.324	4.74084e-254	251.187	6.49772e-252	249.584	2.60888e-250
GSE83082.AEBP2.mESC_244	1945	804.133	0.151374	1.27426	252.81	1.55049e-253	250.674	2.11934e-251	249.069	8.53236e-250
GSE90893.SOX2.MEF_OSpMX	3362	1756.43	0.0505861	0.936675	252.807	1.55984e-253	250.672	2.12636e-251	249.066	8.58377e-250
GSE74055.MED12.mESC_D1_DKO	1745	682.219	0.210241	1.35492	252.389	4.07955e-253	250.256	5.54627e-251	248.649	2.24497e-249
GSE68195.YY1.mESC_Tript	3115	1583.91	0.0460772	0.975738	252.147	7.1265e-253	250.015	9.66271e-251	248.407	3.92171e-249
GSE134053.MTF2.mESC_OHT	1438	503.335	0.151608	1.51447	251.915	1.21702e-252	249.784	1.64573e-250	248.174	6.69726e-249
GSE88991.TCF3.NSC_E47-KO	2581	1218.39	0.0669381	1.08295	251.791	1.61953e-252	249.661	2.18418e-250	248.05	8.91226e-249
GSE82181.ATOH1.colon	1865	756.562	0.12273	1.30165	251.583	2.6094e-252	249.455	3.50982e-250	247.843	1.43596e-248
GSE87037.BRD4.retina_N-P3	2762	1341.91	0.0668377	1.04143	251.295	5.06588e-252	249.168	6.79587e-250	247.555	2.78775e-248
GSE115964.TET2.mESC_Tet2-KO	1808	722.074	0.0944175	1.32418	251.293	5.09083e-252	249.167	6.81127e-250	247.553	2.80148e-248
GSE58019.SUZ12.mESC_DRB-12h	3422	1803.06	0.0507151	0.92439	251.261	5.47852e-252	249.136	7.31065e-250	247.521	3.01483e-248
GSE83757.CEBPB.brown-adipocyte_d6	2625	1249.68	0.090865	1.07076	250.977	1.0553e-251	248.852	1.4045e-249	247.236	5.80729e-248
GSE127804.SUZ12.mESC_AEBP2-KO	1575	583.67	0.15951	1.43213	250.703	1.98259e-251	248.58	2.63172e-249	246.962	1.09102e-247
GSE121660.ARNT2.embryonic-cortical-culture_0kcl_ctlshrna	3099	1576.19	0.0534965	0.975357	250.687	2.05568e-251	248.565	2.72159e-249	246.946	1.13124e-247
GSE101646.PHIP.v6-5	2622	1250.09	0.0710858	1.06864	249.812	1.54271e-250	247.691	2.03713e-248	246.071	8.48955e-247
GSE85062.POU5F1.mESC	1898	779.939	0.176427	1.28305	249.702	1.98399e-250	247.583	2.613e-248	245.962	1.09179e-246
GSE134053.MTF2.mESC_I53SOHT	997	272.47	0.256166	1.8715	249.351	4.45666e-250	247.233	5.85437e-248	245.61	2.4525e-246
GSE83094.RYBP.mESC	1620	612.033	0.161968	1.40431	249.306	4.9469e-250	247.188	6.48153e-248	245.565	2.72228e-246
GSE121660.ARNT2.hippocampus	2470	1150.12	0.163273	1.10272	248.863	1.3698e-249	246.747	1.79011e-247	245.123	7.53803e-246
GSE72164.RNF2.mESC_2i-d3	2555	1207.43	0.0682899	1.08139	248.638	2.30324e-249	246.523	3.0022e-247	244.897	1.26747e-245
GSE134053.MTF2.mESC_I53SETA	1861	759.3	0.100481	1.29334	248.283	5.21368e-249	246.169	6.77839e-247	244.542	2.86909e-245
GSE104045.CDK9.hemogenic-endothelium_Dox	2061	885.068	0.121036	1.21948	248.076	8.40352e-249	245.963	1.08975e-246	244.335	4.62446e-245
GSE24841.SIN3A.mESC_Abcam	2749	1340.69	0.138231	1.03593	247.785	1.63964e-248	245.673	2.12081e-246	244.045	9.02292e-245
GSE134053.PCGF6.mESC_OHT	1560	578.926	0.181522	1.43009	247.733	1.8512e-248	245.622	2.38836e-246	243.992	1.01872e-244
GSE58021.SUZ12.mESC_72h	1721	675.445	0.0744989	1.34934	247.183	6.55878e-248	245.074	8.44039e-246	243.443	3.6093e-244
GSE103685.SUZ12.mESC_129B6F1	877	217.49	0.188927	2.01163	247.009	9.80293e-248	244.9	1.25832e-245	243.268	5.39455e-244
GSE33819.CTCF.spleen_biotag_mZF6	3498	1868.56	0.0619927	0.904606	247.007	9.84685e-248	244.899	1.26076e-245	243.266	5.41872e-244
GSE64589.RUNX1T1.hemogenic-endothelium_induced	1925	801.41	0.0802987	1.26425	246.829	1.48362e-247	244.722	1.89478e-245	243.088	8.16435e-244
GSE61148.SUZ12.thymus_DN3	1607	608.597	0.0685814	1.40081	246.267	5.41152e-247	244.162	6.89383e-245	242.526	2.97796e-243
GSE109712.BRD4.iPSC_Cone_M_N-rCh257-4	2092	908.836	0.178437	1.20279	245.796	1.59837e-246	243.692	2.03108e-244	242.056	8.79583e-243
GSE130091.KMT2D.brown-preadipocyte_4OHT	2882	1437.51	0.05767	1.0035	245.402	3.96607e-246	243.299	5.02712e-244	241.661	2.18253e-242
GSE95533.CTCF.preadipocyte_D0	3083	1577.97	0.0390956	0.966263	245.264	5.44994e-246	243.162	6.8907e-244	241.523	2.9991e-242
GSE129478.ETV6.HPC-7	3043	1550.23	0.0709241	0.973015	245.137	7.29479e-246	243.036	9.20026e-244	241.396	4.01432e-242
GSE117287.SIN3A.mESC_ZFP296-KO_C7	1613	613.94	0.193035	1.39358	244.996	1.01e-245	242.896	1.27066e-243	241.255	5.55805e-242
GSE98754.CDK8.mESC	1453	520.599	0.155784	1.48079	244.99	1.02315e-245	242.891	1.284e-243	241.249	5.63038e-242
GSE118765.SMAD2-3.pancreas_RREB1_TGFb	2333	1067.01	0.0387638	1.12861	244.974	1.06119e-245	242.877	1.32845e-243	241.234	5.83974e-242
GSE75039.KDM1A.NSC	2786	1372.35	0.0647139	1.02155	244.936	1.16008e-245	242.839	1.44866e-243	241.195	6.38393e-242
GSE90910.PHF8.prostate_high-fat-diet	3169	1640.57	0.102288	0.949831	244.435	3.67341e-245	242.341	4.56464e-243	240.694	2.02148e-241
GSE90910.PHF8.prostate_HFD	3169	1640.57	0.102288	0.949831	244.435	3.67341e-245	242.34	4.57588e-243	240.694	2.02148e-241
GSE102517.KLF4.MEF_d6	2503	1182	0.0876339	1.08243	244.031	9.32003e-245	241.937	1.15528e-242	240.29	5.12881e-241
GSE102997.RAD21.liver	3300	1734.73	0.0479011	0.927755	243.957	1.10462e-244	241.865	1.36591e-242	240.216	6.07874e-241
GSE132752.PCGF1.mESC	2710	1322.42	0.154416	1.03511	243.953	1.11461e-244	241.862	1.3749e-242	240.212	6.13368e-241
GSE121660.NCOR2.embryonic-cortical-culture_0kcl_ctlshrna	2712	1323.9	0.0695367	1.03456	243.901	1.25542e-244	241.811	1.54483e-242	240.161	6.90858e-241
GSE101905.POU5F1.MEF_d9_SSEA1-pos	2455	1151.36	0.0558678	1.09239	243.289	5.14378e-244	241.2	6.31419e-242	239.548	2.83062e-240
GSE74055.RAD21.mESC_dCD	3318	1749.57	0.05396	0.92331	243.172	6.72379e-244	241.084	8.23372e-242	239.432	3.7001e-240
GSE90893.KLF4.MEF_OSpMX	3321	1751.79	0.0540184	0.922785	243.142	7.2133e-244	241.055	8.81182e-242	239.401	3.96948e-240
GSE99009.KLF4.MEF_shUbc9	1975	839.074	0.0487462	1.23498	243.092	8.0892e-244	241.006	9.85801e-242	239.351	4.45149e-240
GSE65730.ZFP217.CCE	2745	1349.58	0.164194	1.02429	242.512	3.07366e-243	240.428	3.73675e-241	238.772	1.69143e-239
GSE88789.EP300.heart	2378	1101.8	0.0709914	1.10989	242.417	3.82875e-243	240.334	4.63246e-241	238.676	2.10696e-239
GSE121660.ARNT2.embryonic-cortical-culture_2kcl	3365	1785.13	0.046246	0.914578	242.418	3.82332e-243	240.334	4.63699e-241	238.677	2.10397e-239
GSE99022.KDM1A.mESC_WT-LSD1	3236	1693.11	0.0441642	0.934538	242.409	3.89796e-243	240.327	4.70495e-241	238.669	2.14505e-239
GSE135762.CBX7.mESC_UNC4976	1762	707.707	0.141005	1.31599	242.343	4.54122e-243	240.262	5.46833e-241	238.602	2.49903e-239
GSE130822.ASCL2.colon_regenerating	2805	1391.48	0.0986252	1.01138	242.245	5.68269e-243	240.166	6.82658e-241	238.505	3.12718e-239
GSE102517.MYC.MEF	1843	757.975	0.222746	1.28183	242.127	7.45872e-243	240.049	8.93889e-241	238.387	4.10453e-239
GSE134053.SUZ12.mESC_OHT	1294	434.714	0.163652	1.5737	242.076	8.39323e-243	239.998	1.00351e-240	238.335	4.61879e-239
ENCSR000CDZ.CTCF.thymus	3238	1695.93	0.0493741	0.933027	241.855	1.39739e-242	239.778	1.6668e-240	238.114	7.68985e-239
GSE98140.KMT2B.mESC_WT	3335	1765.71	0.0768504	0.917438	241.624	2.37605e-242	239.549	2.82747e-240	237.884	1.30754e-238
GSE109712.BRD4.iPSC_Amac_M_Y-30-02	2135	944.188	0.136526	1.17709	241.517	3.04314e-242	239.442	3.6128e-240	237.776	1.67464e-238
GSE126496.SP3.Flk1_DNA-Binding	2984	1518.97	0.101631	0.974158	240.926	1.18689e-241	238.852	1.40577e-239	237.185	6.53143e-238
GSE102997.CTCF.liver	3265	1717.59	0.0422632	0.926701	240.898	1.26474e-241	238.826	1.49447e-239	237.157	6.95985e-238
GSE90893.MYC.MEF_endo	2995	1527.19	0.0922248	0.971681	240.71	1.95142e-241	238.638	2.30052e-239	236.969	1.07387e-237
GSE104045.RUNX1.hemogenic-endothelium_Dox-JQ1	2889	1453.53	0.0455563	0.991012	240.566	2.71833e-241	238.495	3.19717e-239	236.825	1.4959e-237
GSE88769.BRD4.mESC_2i	2627	1274.96	0.0697798	1.04296	239.732	1.85345e-240	237.663	2.17488e-238	235.991	1.01995e-236
GSE90794.CBFB.liver_E12-5_lin-neg_pan-CBFB	3097	1601.33	0.0582066	0.951601	239.722	1.89506e-240	237.654	2.21856e-238	235.982	1.04285e-236
GSE121660.NPAS4.embryonic-cortical-culture_2kcl	2642	1285.89	0.0743179	1.03887	239.413	3.85984e-240	237.346	4.5083e-238	235.673	2.12407e-236
GSE98119.SMC3.B-cell_activated_EQbiot	1899	797.398	0.0933353	1.25187	239.397	4.00588e-240	237.331	4.6681e-238	235.657	2.20443e-236
GSE87034.MYC.lung-cancer_PB115	2591	1251.24	0.127478	1.05016	239.373	4.241e-240	237.307	4.93073e-238	235.632	2.33382e-236
GSE83295.JUND.primary-fibroblast_SPRET	2665	1301.75	0.0363793	1.03368	239.347	4.49406e-240	237.283	5.21296e-238	235.607	2.47308e-236
GSE93318.ARNTL.embryonic-fibroblast_EtOH	2016	872.027	0.146597	1.20905	239.094	8.06242e-240	237.03	9.33073e-238	235.353	4.43675e-236
GSE76619.CREB1_PHOSPHO.brown-preadipocyte_vec-4h	2515	1200.83	0.0872991	1.06653	238.859	1.38414e-239	236.796	1.59822e-237	235.118	7.6169e-236
GSE98119.SMC3.B-cell_activated_KAbiot	1842	762.834	0.119146	1.27183	238.735	1.84189e-239	236.673	2.12193e-237	234.994	1.01359e-235
GSE80034.NCAPH2.mESC_shGFP	3043	1565.93	0.140347	0.958476	238.629	2.34979e-239	236.568	2.7009e-237	234.888	1.29309e-235
GSE85177.SMAD3.MEF	2060	901.694	0.182107	1.19193	238.264	5.442e-239	236.205	6.24096e-237	234.524	2.99473e-235
GSE129526.RAD21.MEF_Wapl-ff_cre	3136	1632.83	0.0452839	0.94155	238.146	7.15251e-239	236.087	8.18405e-237	234.405	3.93603e-235
GSE67944.BRD2.mESC	2952	1503.2	0.0722856	0.973659	238.144	7.17544e-239	236.087	8.19174e-237	234.404	3.94864e-235
GSE134053.MTF2.mESC_WT72	1440	523.716	0.123489	1.45921	236.829	1.48402e-237	234.772	1.6904e-235	233.088	8.16656e-234
GSE24164.RFX1.neural-progenitor	1785	730.786	0.116241	1.2884	236.654	2.21756e-237	234.599	2.52027e-235	232.914	1.22033e-233
GSE113429.KLF4.mESC	1897	802.115	0.0829435	1.24184	235.829	1.4842e-236	233.774	1.68302e-234	232.088	8.16754e-233
GSE134053.MTF2.mESC_WT48	1653	651.266	0.0998611	1.34377	235.811	1.54696e-236	233.757	1.75026e-234	232.07	8.5129e-233
GSE94130.BRD4.AT-3	2081	919.881	0.153376	1.17776	235.691	2.03751e-236	233.638	2.30013e-234	231.95	1.12124e-232
GSE49848.KLF5.CGR8_OE	2455	1167.35	0.0711244	1.07248	235.514	3.0646e-236	233.462	3.45191e-234	231.773	1.68645e-232
GSE126496.SP1.Flk1_Sp1-het	2381	1118.34	0.181562	1.09021	235.185	6.52798e-236	233.135	7.33666e-234	231.445	3.59235e-232
GSE99195.TOP2B.MEF	2780	1390.81	0.0471314	0.999156	234.962	1.09081e-235	232.912	1.22322e-233	231.222	6.00273e-232
GSE43229.SUPT5.mESC	2369	1111.67	0.0584491	1.09155	234.517	3.04308e-235	232.468	3.40492e-233	230.776	1.67461e-231
GSE102517.POU5F1.MEF_d2	2687	1328.21	0.0443934	1.01651	234.232	5.86207e-235	232.184	6.54463e-233	230.491	3.2259e-231
GSE130315.CHD4.bone-marrow	2587	1261.09	0.0957935	1.03661	233.566	2.71341e-234	231.52	3.02268e-232	229.826	1.49319e-230
GSE84410.KDM5A.3T3-L1	2723	1354.73	0.084581	1.00719	233.489	3.24483e-234	231.443	3.60672e-232	229.748	1.78563e-230
GSE126496.SP1.Flk1	2935	1503.41	0.129455	0.965127	233.09	8.12573e-234	231.045	9.01216e-232	229.35	4.47159e-230
GSE121660.NCOR2.embryonic-cortical-culture_1kcl	1978	858.365	0.102732	1.20438	233.044	9.03083e-234	231	9.99409e-232	229.304	4.96967e-230
GSE137196.ESR1.uterus_veh	2903	1481.54	0.0534396	0.970446	232.845	1.42993e-233	230.802	1.579e-231	229.104	7.86893e-230
GSE36673.SMAD3.NSC	2617	1283.45	0.064734	1.02789	232.736	1.83601e-233	230.694	2.02299e-231	228.996	1.01036e-229
GSE130091.KMT2D.brown-preadipocyte	2879	1465.4	0.0512779	0.974273	232.564	2.73101e-233	230.523	3.0026e-231	228.823	1.50287e-229
GSE80031.SPI1.bone-marrow_Ly6Chi	2818	1423.02	0.0428874	0.985711	232.467	3.40998e-233	230.427	3.74096e-231	228.727	1.87651e-229
GSE87037.BRD4.retina_N-E17-5	2487	1196.43	0.0644568	1.05567	231.983	1.04052e-232	229.943	1.13904e-230	228.242	5.72598e-229
GSE28325.SUZ12.mESC_scr	1677	671.986	0.0961142	1.31938	231.773	1.68476e-232	229.735	1.8403e-230	228.033	9.27121e-229
GSE44748.KLF3.MEF	2759	1383.97	0.0677072	0.995335	231.616	2.42243e-232	229.578	2.64038e-230	227.875	1.33307e-228
GSE46707.FEZF2.cortical-progenitor	3073	1604.54	0.0982354	0.937485	231.597	2.52734e-232	229.561	2.7488e-230	227.857	1.3908e-228
GSE125972.ESR1.uterus_6h	1548	594.877	0.0379375	1.37974	231.215	6.08935e-232	229.18	6.60871e-230	227.475	3.35097e-228
GSE125116.FOXH1.EBs_Activin	3075	1607.45	0.0924534	0.935812	231.006	9.86081e-232	228.971	1.06789e-229	227.265	5.4264e-228
GSE85177.SMAD3.MEF_Dox	2195	1004.41	0.176788	1.12787	230.33	4.67845e-231	228.296	5.05578e-229	226.589	2.57455e-227
GSE74055.RAD21.mESC_D1_DKO	1841	776.78	0.0623645	1.24491	229.91	1.23089e-230	227.877	1.32733e-228	226.169	6.77358e-227
GSE134583.SPI1.bone-marrow	3475	1898.78	0.0638083	0.871943	229.665	2.16078e-230	227.634	2.32511e-228	225.925	1.18908e-226
GSE50209.KMT2D.brown-preadipocyte_d7_KO	1862	790.604	0.0363736	1.23583	229.568	2.70453e-230	227.537	2.90404e-228	225.827	1.4883e-226
GSE66830.SUZ12.mESC_min-RNase	1270	436.209	0.109615	1.54174	229.541	2.87696e-230	227.511	3.08264e-228	225.8	1.58319e-226
GSE121759.SUZ12.iPSC_del-TRF1	1460	545.653	0.143588	1.41991	229.167	6.80377e-230	227.138	7.27479e-228	225.427	3.74411e-226
GSE111024.FOXA1.intestinal-villus-cell_EED-ko-d11	2402	1145.17	0.0394145	1.06868	229.028	9.3762e-230	227	1.00042e-227	225.287	5.15973e-226
GSE89929.EZH2.mESC	2083	933.492	0.104616	1.15795	229.014	9.6797e-230	226.987	1.03062e-227	225.274	5.32674e-226
GSE99101.BRD4.preadipocyte_d2	2265	1053.58	0.0546059	1.10421	228.912	1.22356e-229	226.886	1.30002e-227	225.172	6.73326e-226
GSE99195.RAD21.MEF	2154	980.36	0.0282714	1.13563	228.806	1.56361e-229	226.78	1.65784e-227	225.065	8.60457e-226
GSE102940.BRD4.CD4-pos	2604	1283.28	0.0768096	1.02089	228.799	1.58742e-229	226.775	1.67956e-227	225.059	8.73557e-226
GSE38269.KDM6B.NSC	2903	1491.34	0.0563263	0.960937	228.784	1.6455e-229	226.76	1.73737e-227	225.043	9.05516e-226
GSE93953.TOX.CD8-pos_Tox-KO	906	246.003	0.292258	1.88083	228.64	2.2906e-229	226.617	2.41346e-227	224.899	1.26052e-225
GSE69955.RNF2.mESC	1678	677.648	0.110033	1.30814	228.51	3.08974e-229	226.488	3.24869e-227	224.769	1.70028e-225
GSE130091.KMT2D.brown-preadipocyte_K27R_4OHT	2156	983.103	0.0668589	1.13294	228.064	8.6316e-229	226.043	9.05682e-227	224.323	4.74997e-225
GSE29218.CTCF.thymus	3145	1665.73	0.0488711	0.916906	227.729	1.86696e-228	225.709	1.95488e-226	223.988	1.02739e-224
GSE116603.SUZ12.mESC_EZH1-KO-EZH2Y726D_DMSO	2028	901.394	0.107832	1.16983	227.038	9.16068e-228	225.019	9.57225e-226	223.297	5.04112e-224
GSE129333.CREBBP.mESC_2k	2585	1274.54	0.126319	1.02019	226.865	1.36508e-227	224.847	1.42347e-225	223.124	7.51203e-224
GSE93755.SPI1.T-cell_OHT-0h_ert2	2896	1491.38	0.106478	0.957417	226.744	1.80274e-227	224.727	1.87598e-225	223.003	9.92047e-224
GSE125116.SMAD4.EBs_SB431542	2601	1286.31	0.094979	1.01583	226.528	2.96422e-227	224.512	3.07832e-225	222.787	1.63121e-223
GSE113429.KLF4.mESC_d9	2457	1187.93	0.0835942	1.04845	226.437	3.65372e-227	224.422	3.78658e-225	222.697	2.01064e-223
GSE120773.SOX11.keratinocyte	2637	1311.45	0.070716	1.00774	226.393	4.0454e-227	224.378	4.18393e-225	222.652	2.22618e-223
GSE84410.KDM5A.3T3-L1_4h	2832	1447.27	0.0629249	0.968485	226.377	4.20014e-227	224.363	4.33511e-225	222.636	2.31134e-223
GSE129494.KLF4.iPSC	1903	822.493	0.10158	1.2102	226.175	6.68357e-227	224.162	6.88429e-225	222.434	3.67797e-223
GSE81299.KDM4C.MLL-AF9_OHT	2625	1305.26	0.0572744	1.00799	225.47	3.38791e-226	223.458	3.48256e-224	221.729	1.86437e-222
GSE110382.RBBP4.NIH3T3	2687	1348.48	0.0866187	0.994662	225.349	4.47452e-226	223.338	4.5902e-224	221.609	2.46233e-222
GSE90893.HDAC1.pre-iPSC	2974	1550.79	0.0905107	0.939405	225.02	9.5556e-226	223.01	9.7828e-224	221.279	5.25845e-222
GSE118115.EZH2.mESC	931	262.139	0.11872	1.82845	224.248	5.64823e-225	222.239	5.77083e-223	220.507	3.10822e-221
GSE90910.PHF8.prostate_control-diet	3017	1583.6	0.084752	0.929907	224.127	7.46665e-225	222.119	7.59803e-223	220.386	4.1089e-221
GSE90910.PHF8.prostate	3017	1583.6	0.084752	0.929907	224.127	7.46665e-225	222.118	7.61335e-223	220.386	4.1089e-221
ENCSR000AII.E2F4.myocyte	1598	636.062	0.0951814	1.32903	223.741	1.81652e-224	221.734	1.84477e-222	220	9.99632e-221
GSE110950.ETS2.TSC_differentiated	3047	1605.98	0.0399727	0.923939	223.738	1.82776e-224	221.732	1.85247e-222	219.997	1.00582e-220
GSE62482.AFF4.EL4_GFP_RA	1712	706.268	0.161784	1.2774	223.709	1.95444e-224	221.704	1.97689e-222	219.968	1.07553e-220
GSE103255.GFI1.spleen	3208	1721.54	0.0869282	0.89797	223.704	1.97872e-224	221.7	1.99746e-222	219.963	1.08889e-220
GSE64312.RNF2.3T3-L1_Kdm2b-V5	2480	1209.67	0.0409417	1.03573	223.648	2.25005e-224	221.645	2.26684e-222	219.907	1.2382e-220
GSE129333.EP300.mESC_2k	2549	1257.82	0.127272	1.019	223.27	5.37395e-224	221.267	5.40328e-222	219.529	2.95728e-220
GSE24852.HDAC1.myoblast	2083	944.701	0.0511329	1.14073	223.075	8.41769e-224	221.073	8.44684e-222	219.334	4.63226e-220
GSE121660.HDAC3.embryonic-cortical-culture	2203	1024.38	0.117908	1.10471	222.878	1.32585e-223	220.877	1.32781e-221	219.137	7.29618e-220
GSE121660.NCOR2.embryonic-cortical-culture_0kcl_a2shrna_mili	2848	1467.01	0.0540315	0.957067	222.872	1.34396e-223	220.872	1.34329e-221	219.131	7.39584e-220
GSE135762.RNF2.mESC_UNC4976	2788	1425.22	0.0863398	0.968045	222.708	1.95843e-223	220.709	1.95358e-221	218.967	1.07772e-219
GSE22934.POU5F1.mESC	1729	719.008	0.128169	1.26586	222.387	4.10025e-223	220.389	4.08205e-221	218.647	2.25637e-219
GSE101905.POU5F1.MEF_d6_SSEA1-pos	2438	1183.92	0.0470275	1.04213	222.308	4.91514e-223	220.311	4.88371e-221	218.568	2.7048e-219
GSE121660.ARNT2.hippocampus_2ka	2606	1299.4	0.124279	1.00399	222.276	5.29604e-223	220.28	5.25186e-221	218.535	2.91441e-219
GSE115965.TET2.hematopoietic-cell_Tet2-KO	2510	1233.26	0.0755705	1.0252	222.265	5.42952e-223	220.27	5.37369e-221	218.525	2.98787e-219
GSE83295.SMARCA4.primary-fibroblast_ANM	1556	613.225	0.112729	1.34335	221.971	1.06942e-222	219.976	1.05635e-220	218.23	5.88499e-219
GSE104045.BRD4.hemogenic-endothelium	2444	1189.34	0.133413	1.03908	221.696	2.01418e-222	219.702	1.9857e-220	217.955	1.1084e-218
GSE74189.EP300.brown-preadipocyte_KO	1953	862.626	0.031075	1.17889	221.684	2.07116e-222	219.691	2.0379e-220	217.943	1.13976e-218
GSE101593.SMAD4.CD4_IL6-TGFbR-inhibitor	2343	1120.87	0.0863588	1.06373	221.625	2.37278e-222	219.633	2.33014e-220	217.884	1.30574e-218
GSE83863.MYC.liver_TetYapMyc	2187	1016.4	0.0579414	1.10548	221.544	2.85806e-222	219.553	2.80126e-220	217.803	1.57279e-218
GSE61148.MTA2.thymus_DN3	3035	1603.34	0.0704732	0.920618	221.429	3.72055e-222	219.439	3.63956e-220	217.689	2.04742e-218
GSE97731.EZH1.heart	2970	1557.35	0.0388174	0.93137	221.288	5.15764e-222	219.298	5.03562e-220	217.547	2.83825e-218
GSE79606.SUZ12.mESC_KO	1173	392.315	0.185572	1.58012	221.139	7.25986e-222	219.15	7.07445e-220	217.398	3.9951e-218
GSE121660.TBL1X.embryonic-cortical-culture_2kcl	2579	1283.38	0.0760072	1.00687	221.115	7.67037e-222	219.127	7.4601e-220	217.375	4.221e-218
GSE68195.YY1.mESC	2670	1346.83	0.0901601	0.987276	220.982	1.04321e-221	218.995	1.01266e-219	217.241	5.74077e-218
GSE70893.GFI1.CD4	2006	898.348	0.181276	1.15897	220.961	1.09485e-221	218.974	1.06075e-219	217.22	6.02494e-218
GSE81897.SHOX2.palate_E12-5	3071	1631.12	0.0483006	0.912848	220.65	2.23686e-221	218.665	2.16306e-219	216.91	1.23094e-217
GSE59569.MED1.mESC_SNEL3	2920	1523.55	0.0499487	0.938528	220.599	2.51828e-221	218.614	2.43055e-219	216.858	1.38581e-217
GSE134053.MTF2.mESC_WTETA	1877	815.789	0.0869223	1.20216	220.534	2.92731e-221	218.55	2.81995e-219	216.793	1.6109e-217
GSE125116.FOXH1.EBs_SB431542	3323	1814.68	0.0693158	0.872773	220.079	8.34289e-221	218.096	8.02163e-219	216.338	4.59109e-217
GSE84410.KDM5A.3T3-L1_d2	2796	1437.28	0.0967809	0.960022	220.046	9.0021e-221	218.064	8.63903e-219	216.305	4.95385e-217
GSE33819.CTCF.spleen_biotag_mZF7	3263	1771.46	0.0611576	0.881257	219.94	1.14787e-220	217.959	1.09949e-218	216.2	6.31672e-217
GSE137978.NR3C1.liver_High-Fat-diet_13wk	1950	864.3	0.104524	1.17387	219.702	1.98632e-220	217.721	1.899e-218	215.961	1.09307e-216
GSE125669.PAX7.pituitary-derived-cell	2716	1383.19	0.0411996	0.973482	219.186	6.51756e-220	217.206	6.21929e-218	215.445	3.58661e-216
GSE137978.NR3C1.liver_control-diet_13wk	2228	1049.64	0.101425	1.08586	218.648	2.25014e-219	216.669	2.14313e-217	214.907	1.23825e-215
GSE118765.SMAD2-3.pancreas_RREB1_TGFb_KO	1692	702.398	0.0456939	1.26837	218.419	3.81053e-219	216.441	3.62247e-217	214.678	2.09693e-215
GSE109712.BRD4.iPSC_Bipo_I_Y-rM0405	1727	724.456	0.162343	1.2533	218.323	4.75177e-219	216.346	4.50879e-217	214.583	2.6149e-215
GSE62437.SUZ12.MLL-AF9	1584	635.982	0.169793	1.31651	218.21	6.16781e-219	216.233	5.84147e-217	214.469	3.39415e-215
GSE126496.SP3.mESC	3128	1678.53	0.0736173	0.89804	218.202	6.27966e-219	216.226	5.93628e-217	214.461	3.4557e-215
GSE98808.ERF.prostate	2666	1350.64	0.0665967	0.981038	218.174	6.69833e-219	216.199	6.32024e-217	214.433	3.68609e-215
GSE77093.RNF2.mESC_E882K	1313	474.856	0.153191	1.46731	218.16	6.91151e-219	216.186	6.50924e-217	214.42	3.8034e-215
GSE120873.BCL11B.CD4-pos	1434	545.702	0.163103	1.39386	218.104	7.87137e-219	216.131	7.39945e-217	214.363	4.33161e-215
GSE62978.CREB1.MC3T3-E1_Fsk	2947	1549.13	0.043817	0.927791	218.078	8.36169e-219	216.105	7.8458e-217	214.337	4.60144e-215
GSE118399.EZH2.TSC_CB	906	255.343	0.266157	1.82708	218.012	9.71872e-219	216.041	9.10222e-217	214.272	5.34821e-215
GSE99101.BRD4.preadipocyte_d0_MLL3-4-KO	2654	1342.98	0.0435768	0.982735	217.871	1.34687e-218	215.9	1.2591e-216	214.13	7.41182e-215
GSE128182.YY1.cortical-neuron_6h-KCL	2896	1514.03	0.0613819	0.935668	217.608	2.46465e-218	215.638	2.29979e-216	213.868	1.3563e-214
GSE43229.KDM4C.mESC	3538	1979.27	0.0574276	0.837964	217.592	2.55895e-218	215.623	2.38339e-216	213.851	1.40819e-214
GSE98134.KDM1A.C2C12_adipogenic-diff_OE	1502	587.249	0.100361	1.35484	217.496	3.18841e-218	215.528	2.9642e-216	213.756	1.75458e-214
GSE121660.NCOR2.embryonic-cortical-culture_5kcl	2294	1096.83	0.122347	1.06453	217.317	4.81531e-218	215.35	4.46847e-216	213.577	2.64986e-214
GSE43229.KDM4B.mESC	2303	1103.58	0.0356017	1.06133	217.003	9.92747e-218	215.036	9.19555e-216	213.263	5.46308e-214
GSE74055.RAD21.mESC_D1-5	1838	797.884	0.0793404	1.20389	216.532	2.93568e-217	214.566	2.71427e-215	212.792	1.61551e-213
GSE49848.KLF5.mESC	2340	1129.77	0.0468215	1.05048	216.486	3.2643e-217	214.521	3.0126e-215	212.746	1.79634e-213
GSE90794.CBFB.liver_E12-5_lin-neg_CBFB2	1880	824.934	0.0726654	1.18838	216.483	3.28613e-217	214.519	3.02722e-215	212.743	1.80836e-213
GSE62978.CREB1.MC3T3-E1_veh	2926	1538.29	0.0477863	0.927601	216.458	3.48487e-217	214.494	3.20447e-215	212.717	1.91772e-213
GSE120806.STAT1.aorta_VSMC_IFNg	3100	1663.46	0.0598375	0.898084	216.284	5.19429e-217	214.322	4.76767e-215	212.544	2.85842e-213
GSE134053.EPOP.mESC_WT72	1465	567.655	0.118835	1.36781	215.688	2.05139e-216	213.726	1.87949e-214	211.947	1.12888e-212
GSE125673.TRIM28.mESC	2544	1271.69	0.0406273	1.00036	215.637	2.30549e-216	213.676	2.10848e-214	211.897	1.26871e-212
GSE133710.GLI3.forelimb_E10	1882	827.854	0.130396	1.18482	215.577	2.6463e-216	213.617	2.4158e-214	211.837	1.45626e-212
GSE97869.CTCF.erythroid_D39	2800	1451.2	0.0499821	0.948179	215.521	3.0137e-216	213.561	2.74624e-214	211.78	1.65844e-212
GSE28325.PHF19.mESC_Pcl3-sh6	1376	515.447	0.0665957	1.41659	215.232	5.85722e-216	213.273	5.3278e-214	211.492	3.22323e-212
GSE60699.HEY2.CM7-1_mESC	1443	555.187	0.141221	1.37803	215.206	6.21698e-216	213.248	5.6449e-214	211.466	3.42121e-212
GSE90949.BCL11B.thymocyte_ThPOKgfpTESPE	3080	1652.34	0.0485552	0.898417	215.045	9.023e-216	213.087	8.17803e-214	211.304	4.96536e-212
GSE16526.MTF2.mESC	914	262.078	0.0463536	1.8022	215.009	9.78945e-216	213.053	8.85683e-214	211.269	5.38714e-212
GSE126496.SP3.Flk1_Sp1-het	3059	1637.5	0.0701638	0.901561	214.937	1.15673e-215	212.981	1.04466e-213	211.196	6.3655e-212
GSE127804.MTF2.mESC_FLAG-SUZ12-KO	1221	426.599	0.165762	1.51711	214.835	1.46226e-215	212.88	1.31824e-213	211.094	8.04683e-212
GSE74268.SMARCA4.retina	3182	1726.91	0.0670615	0.881739	214.738	1.82761e-215	212.784	1.64467e-213	210.998	1.00573e-211
GSE77093.RNF2.mESC_Smarca4flfl_EtOH	1385	521.602	0.12689	1.40886	214.614	2.4344e-215	212.66	2.18683e-213	210.873	1.33965e-211
GSE90893.KLF4.MEF_OSKpMX	3042	1626.32	0.0562771	0.903413	214.542	2.86909e-215	212.59	2.57275e-213	210.802	1.57886e-211
GSE81897.SHOX2.limb_E13-5	2701	1383.97	0.0759326	0.964676	214.478	3.32601e-215	212.526	2.97719e-213	210.737	1.8303e-211
GSE78708.KMT2D.mESC_KO	3034	1621.82	0.121026	0.903611	214.068	8.55795e-215	212.117	7.64689e-213	210.327	4.70944e-211
GSE83863.MYC.liver_TetMyc	2255	1077.33	0.0539965	1.06567	214.06	8.71496e-215	212.109	7.77346e-213	210.319	4.79584e-211
GSE72164.RNF2.mESC_2i-d1	2229	1060.63	0.105856	1.07148	213.656	2.20861e-214	211.706	1.96654e-212	209.915	1.2154e-210
GSE82144.HDAC1.B-cell_activated	3010	1605.66	0.0718257	0.906597	213.652	2.22969e-214	211.703	1.98182e-212	209.911	1.227e-210
GSE128658.SMAD4.kupffer-cell	2347	1141.67	0.0490932	1.03967	213.188	6.49153e-214	211.24	5.75976e-212	209.447	3.57229e-210
GSE90893.CEBPA.MEF_48h	3016	1611.26	0.0602874	0.904444	213.161	6.90081e-214	211.214	6.11217e-212	209.421	3.79751e-210
GSE99195.TOP2A.MEF_Top2b-KO	2890	1521.51	0.0501032	0.925567	212.978	1.05283e-213	211.031	9.30883e-212	209.237	5.79374e-210
GSE64040.RAD23B.mESC	1925	860.578	0.0300612	1.16148	212.92	1.2036e-213	210.974	1.06233e-211	209.179	6.62339e-210
GSE53583.SMARCA5.mammary-epithelium	1997	907.94	0.0454359	1.13717	212.771	1.6942e-213	210.826	1.49274e-211	209.03	9.32317e-210
GSE80231.SP7.MC3T3-E1_Bio-FLAG	2611	1325.27	0.0513309	0.978315	212.655	2.21202e-213	210.711	1.9456e-211	208.915	1.21727e-209
GSE50209.KMT2D.brown-preadipocyte_d7	2272	1092.02	0.0304639	1.05697	212.554	2.79262e-213	210.61	2.45201e-211	208.813	1.53678e-209
GSE76185.SP7.MC3T3-E1_mut	2702	1389.45	0.0579903	0.959518	212.511	3.07992e-213	210.569	2.69957e-211	208.771	1.69488e-209
GSE68195.YY1.mESC_Rel-30	2688	1379.87	0.0586068	0.961996	212.397	4.01134e-213	210.455	3.50989e-211	208.656	2.20744e-209
GSE126496.SP3.mESC_Sp1-KO	3136	1700.11	0.0649007	0.883293	212.333	4.64419e-213	210.392	4.05661e-211	208.592	2.5557e-209
GSE135762.RNF2.mESC_UNC3866	2202	1045.49	0.0951147	1.07463	212.189	6.46643e-213	210.249	5.63856e-211	208.449	3.55847e-209
GSE104045.FLI1.hemogenic-endothelium	2383	1168.87	0.0572039	1.02766	212.015	9.66704e-213	210.075	8.4149e-211	208.274	5.31977e-209
GSE35213.TCF4.liver	1418	545.071	0.169253	1.37934	211.858	1.38614e-212	209.919	1.20453e-210	208.118	7.62794e-209
GSE77744.TCF3.B-cell_DSG_4d	2304	1115.61	0.0684167	1.04631	211.69	2.04302e-212	209.751	1.7723e-210	207.949	1.12428e-208
GSE82144.HDAC2.B-cell_resting	2925	1549.9	0.0691489	0.916266	211.664	2.16704e-212	209.727	1.87666e-210	207.924	1.19252e-208
GSE60223.MYC.lymphoma	1806	786.188	0.0738983	1.19985	211.554	2.79227e-212	209.617	2.41398e-210	207.813	1.53659e-208
GSE54209.SRF_mut.cornea_mut	2495	1247.54	0.0605877	0.999955	211.369	4.27546e-212	209.433	3.68992e-210	207.628	2.35279e-208
GSE92407.YY1.mESC_serum	2649	1354.96	0.0775741	0.967197	211.367	4.2916e-212	209.432	3.69754e-210	207.627	2.36167e-208
GSE72892.FOXO1.uterus	2444	1212.45	0.124923	1.01132	211.291	5.11179e-212	209.357	4.39671e-210	207.551	2.81302e-208
GSE92846.KLF4.mESC_mitotic	1703	721.471	0.117863	1.23907	211.088	8.15953e-212	209.155	7.00619e-210	207.348	4.49019e-208
GSE131327.TBX5.heart_neonatal_SF	1609	663.05	0.100897	1.27897	210.817	1.5233e-211	208.884	1.30577e-209	207.077	8.38274e-208
GSE67520.POU5F1.MEF_d18_sc	2299	1114.15	0.0620831	1.04506	210.786	1.63623e-211	208.854	1.4002e-209	207.046	9.0042e-208
GSE137196.ESR1.uterus_AF-2-mut_veh	2933	1558.15	0.0416454	0.912547	210.694	2.02124e-211	208.763	1.72674e-209	206.954	1.11229e-207
GSE50590.MEN1.C2C12_MB	2380	1170.89	0.0987757	1.02336	210.179	6.62245e-211	208.248	5.64801e-209	206.438	3.64433e-207
GSE126496.SP3.Flk1	2837	1491.28	0.0891606	0.927813	210.016	9.62946e-211	208.086	8.19874e-209	206.276	5.29909e-207
GSE54046.NEUROD1.pancreas	2653	1361.16	0.049326	0.962792	209.965	1.08308e-210	208.036	9.20613e-209	206.225	5.96021e-207
GSE56932.SIN3A.C2C12	1982	904.071	0.228446	1.13245	209.652	2.22701e-210	207.724	1.88977e-208	205.912	1.22553e-206
GSE87037.BRD4.retina_N-P14	2443	1216.29	0.0494655	1.00617	209.296	5.06118e-210	207.368	4.28755e-208	205.555	2.78517e-206
GSE22934.RBBP5.mESC	1125	379.819	0.0845865	1.56654	209.113	7.70154e-210	207.186	6.51341e-208	205.373	4.23816e-206
GSE102517.KLF4.MEF_d4	1660	697.75	0.113714	1.2504	209.087	8.17582e-210	207.161	6.90298e-208	205.347	4.49915e-206
GSE87820.SMARCA4.mESC_UNT	2131	1004.58	0.0617789	1.08493	208.896	1.26912e-209	206.971	1.06975e-207	205.156	6.98398e-206
GSE125972.SMC1A.uterus_1h	2949	1574.43	0.0613225	0.9054	208.863	1.37044e-209	206.938	1.15324e-207	205.123	7.54156e-206
GSE94130.BRD4.AT-3_IFNg	1808	792.303	0.157697	1.19027	208.844	1.43138e-209	206.92	1.20251e-207	205.104	7.87688e-206
GSE53828.CLOCK.liver	3245	1789.92	0.0420288	0.858326	208.58	2.63058e-209	206.656	2.20631e-207	204.839	1.44761e-205
GSE126496.SP1.mESC_Sp1-het	2836	1494.51	0.0928314	0.924181	208.472	3.3717e-209	206.549	2.82322e-207	204.732	1.85545e-205
GSE43229.SUPT5.mESC_KDM4C-KO	2304	1123.14	0.0627707	1.03661	208.223	5.97959e-209	206.301	4.99859e-207	204.483	3.29057e-205
GSE125972.SMC1A.uterus_Veh	2968	1590.04	0.0539597	0.900425	208.126	7.48104e-209	206.205	6.2434e-207	204.385	4.11682e-205
GSE122715.RNF2.mESC-E14_PCGF2-4-KO	1858	826.095	0.12061	1.16937	208.026	9.42628e-209	206.105	7.85386e-207	204.285	5.18728e-205
GSE21529.GATA4.HL-1	1357	514.331	0.0567925	1.39965	207.968	1.07554e-208	206.048	8.94651e-207	204.228	5.91868e-205
GSE80231.SP7.MC3T3-E1	2576	1312.07	0.052443	0.973287	207.91	1.23003e-208	205.991	1.02148e-206	204.169	6.76887e-205
GSE86897.IRF4.pre-B-cell_IKDN	2642	1359.05	0.0732871	0.959036	207.648	2.25035e-208	205.729	1.86574e-206	203.907	1.23837e-204
GSE134053.EPOP.mESC_PARETA	1478	587.799	0.118677	1.33025	207.414	3.85517e-208	205.496	3.19105e-206	203.673	2.1215e-204
GSE104045.BRD4.hemogenic-endothelium_Dox	2409	1197.17	0.139814	1.00881	207.372	4.24395e-208	205.455	3.50712e-206	203.632	2.33544e-204
GSE87037.BRD4.retina_N-P21	2461	1233.31	0.0653513	0.996704	207.309	4.90508e-208	205.393	4.04686e-206	203.569	2.69927e-204
GSE77744.TCF3.plasmablast_DSG	2516	1271.65	0.0868905	0.984427	207.274	5.31845e-208	205.358	4.38075e-206	203.534	2.92675e-204
GSE134053.SUZ12.mESC_PARETA	1304	485.462	0.127956	1.42551	206.273	5.32731e-207	204.358	4.38091e-205	202.533	2.93162e-203
GSE72164.SUZ12.mESC_2i-d3	1223	438.918	0.117033	1.4784	205.961	1.09432e-206	204.047	8.98453e-205	202.22	6.02204e-203
GSE50209.KMT2D.brown-preadipocyte_d2_KO	1817	803.367	0.025842	1.17743	205.934	1.16311e-206	204.021	9.53385e-205	202.194	6.40061e-203
GSE135762.CBX7.mESC_UNC4219	1898	856.244	0.0960235	1.14839	205.831	1.47481e-206	203.918	1.20692e-204	202.091	8.11586e-203
GSE93764.BHLHE41.spleen_B-1a	1415	552.063	0.181643	1.3579	205.807	1.5587e-206	203.895	1.27351e-204	202.067	8.57753e-203
GSE109865.GABPA.liver_TCDD	2649	1369.32	0.0862614	0.951985	205.465	3.42698e-206	203.554	2.79545e-204	201.724	1.88587e-202
GSE50590.WDR5.C2C12_MB	2010	930.848	0.189212	1.11058	205.423	3.77186e-206	203.513	3.07182e-204	201.683	2.07565e-202
GSE27841.HDAC2.mESC	1642	693.354	0.035814	1.24379	204.946	1.13151e-205	203.036	9.20024e-204	201.206	6.22669e-202
GSE112311.SUZ12.mESC	1228	443.45	0.178852	1.46947	204.677	2.10464e-205	202.767	1.70853e-203	200.936	1.15818e-201
GSE117287.CHD4.mESC_spikein	1206	430.916	0.0774318	1.48475	204.608	2.46451e-205	202.7	1.99746e-203	200.868	1.35622e-201
GSE72164.RNF2.mESC	2011	933.271	0.090139	1.10755	204.539	2.89364e-205	202.631	2.34151e-203	200.798	1.59237e-201
GSE77744.TCF3.B-cell_DSG	2577	1321.98	0.0658271	0.962995	204.081	8.30129e-205	202.173	6.70661e-203	200.34	4.5682e-201
GSE87037.BRD4.retina_N-E14-5	2433	1221.38	0.0568086	0.994227	204.066	8.58572e-205	202.16	6.92534e-203	200.326	4.72472e-201
GSE83960.SMC1A.bone-marrow_KO	2697	1406.95	0.0586598	0.938787	203.995	1.01072e-204	202.089	8.13957e-203	200.255	5.56197e-201
GSE21614.SMAD3.mESC_Myod1-d5	1573	651.797	0.055915	1.27102	203.931	1.17304e-204	202.026	9.41683e-203	200.19	6.45525e-201
GSE21614.SMAD3.mESC_d5_Myod1	1573	651.797	0.055915	1.27102	203.931	1.17304e-204	202.025	9.4318e-203	200.19	6.45525e-201
GSE54424.SOX9.back-skin	1468	587.368	0.098464	1.32152	203.699	1.99871e-204	201.795	1.60197e-202	199.959	1.09989e-200
GSE94737.ESR1.uterus	2822	1497.09	0.0769608	0.914559	203.594	2.54794e-204	201.691	2.03894e-202	199.853	1.40213e-200
GSE89929.RNF2.mESC	2586	1330	0.123691	0.959295	203.384	4.1305e-204	201.481	3.30013e-202	199.643	2.27302e-200
GSE121660.NCOR2.embryonic-cortical-culture_2kcl_ctlshrna	2672	1390.97	0.0399384	0.94183	203.295	5.06443e-204	201.394	4.03992e-202	199.555	2.78695e-200
GSE64312.RNF2.3T3-L1_dF-box	2151	1030.16	0.0829637	1.06214	203.081	8.29924e-204	201.18	6.60993e-202	199.34	4.56707e-200
GSE63204.STAT1.CD4-pos_IL21	2344	1162.33	0.109293	1.01195	202.946	1.13116e-203	201.046	8.99496e-202	199.206	6.22478e-200
GSE116704.GABPA.mESC	2802	1484.83	0.0928983	0.916164	202.801	1.58029e-203	200.901	1.25467e-201	199.061	8.69633e-200
GSE90910.PHF8.prostate_MYC_high-fat-diet	2888	1546.87	0.0624109	0.90072	202.685	2.06411e-203	200.787	1.63367e-201	198.945	1.13588e-199
GSE90910.PHF8.prostate_HFD_Hi-MYC	2888	1546.87	0.0624109	0.90072	202.685	2.06411e-203	200.786	1.63623e-201	198.945	1.13588e-199
GSE72069.KLF5.pancreas-cancer	1688	726.545	0.0831773	1.21619	202.574	2.66418e-203	200.677	2.10531e-201	198.834	1.4661e-199
GSE44286.CDK8.mESC	2329	1154.48	0.0622428	1.01247	201.844	1.43071e-202	199.947	1.12882e-200	198.104	7.87317e-199
GSE112311.SUZ12.mESC_Tet1-KO	1203	432.818	0.18502	1.4748	201.789	1.62656e-202	199.892	1.28135e-200	198.048	8.95098e-199
GSE85172.IRF4.Th2_WT	2259	1107.53	0.0645927	1.02833	201.312	4.8705e-202	199.417	3.83085e-200	197.572	2.68024e-198
GSE83960.RAD21.bone-marrow	2915	1570.06	0.0579085	0.892676	201.29	5.12543e-202	199.395	4.0251e-200	197.55	2.82052e-198
GSE117488.RELA.liver_SFD	2375	1187.73	0.0818655	0.999722	201.21	6.17276e-202	199.315	4.84007e-200	197.469	3.39687e-198
GSE71698.IRF4.pre-plasmablast	2453	1242.05	0.0844261	0.981821	201.178	6.6298e-202	199.285	5.19039e-200	197.438	3.64838e-198
GSE112417.SMAD3.VSMC_shNT	3005	1635.57	0.0494764	0.877569	201.172	6.7341e-202	199.279	5.2639e-200	197.431	3.70578e-198
GSE81299.KDM4C.MLL-AF9_ctrl	2998	1630.53	0.0721645	0.878658	201.156	6.98401e-202	199.264	5.45082e-200	197.415	3.8433e-198
GSE77093.RNF2.mESC_K785R	1283	480.605	0.11291	1.4166	200.822	1.50766e-201	198.93	1.17488e-199	197.081	8.29668e-198
GSE99009.KLF4.MEF_shCTRL	2228	1087.44	0.05464	1.03481	200.8	1.58494e-201	198.909	1.23319e-199	197.059	8.72191e-198
GSE125972.SMC1A.uterus_4h	2850	1524.6	0.0532133	0.902529	200.765	1.71782e-201	198.875	1.33453e-199	197.024	9.45318e-198
GSE68195.YY1.mESC_CDK7i	2851	1525.55	0.0411471	0.902137	200.678	2.09684e-201	198.789	1.62648e-199	196.938	1.15389e-197
GSE54209.SRF.cornea	2296	1135.2	0.0461239	1.01618	200.308	4.91721e-201	198.419	3.80835e-199	196.568	2.70594e-197
GSE132752.PCGF1.mESC_TAM	2764	1464.22	0.138658	0.916625	200.257	5.53516e-201	198.369	4.2804e-199	196.516	3.046e-197
GSE62437.SUZ12.MLL-AF9_UNC1999	2320	1152.08	0.102942	1.00989	200.161	6.90605e-201	198.273	5.33237e-199	196.42	3.8004e-197
GSE92745.SMC1A.epiblast-cell	1517	623.281	0.0482031	1.28327	200.03	9.34042e-201	198.143	7.20102e-199	196.289	5.14003e-197
GSE62482.AFF4.EL4_RA	1383	541.557	0.165332	1.35262	199.855	1.39587e-200	197.969	1.07451e-198	196.115	7.68147e-197
GSE66146.RBPJ.leukemia	2128	1022.15	0.0640038	1.05789	199.51	3.08863e-200	197.625	2.37395e-198	195.77	1.69967e-196
GSE131926.MED24.mESC_a_4OHT	2812	1500.83	0.0615102	0.905836	199.419	3.81452e-200	197.534	2.92743e-198	195.678	2.09913e-196
GSE76185.SP7.MC3T3-E1	2793	1487.46	0.0457666	0.908962	199.313	4.86551e-200	197.428	3.72835e-198	195.572	2.67749e-196
GSE122715.PCGF6.mESC-E14_shCtR	2066	980.744	0.0919612	1.07489	199.286	5.17656e-200	197.402	3.9607e-198	195.545	2.84866e-196
GSE82144.HDAC1.B-cell_resting	2595	1346.74	0.131041	0.946261	199.156	6.9846e-200	197.273	5.33599e-198	195.415	3.84362e-196
GSE102940.BRD4.CD4-pos_OX40L-treated	2553	1317.35	0.0645986	0.95455	199.041	9.09237e-200	197.159	6.93578e-198	195.301	5.00353e-196
GSE54013.RUNX2.MC3T3-E1_d28	2845	1525.62	0.0493418	0.89903	199.022	9.49738e-200	197.141	7.23382e-198	195.282	5.22641e-196
GSE41602.SMC3.MEF_Wapl-pos	1928	889.653	0.0345031	1.11579	198.75	1.77816e-199	196.869	1.35232e-197	195.009	9.78521e-196
GSE50590.ING1.C2C12_MT	1936	895.772	0.207658	1.11188	198.337	4.59915e-199	196.457	3.49249e-197	194.597	2.53091e-195
GSE27841.HDAC1.mESC	1144	403.72	0.057375	1.50266	198.177	6.6542e-199	196.297	5.04547e-197	194.436	3.66181e-195
GSE76637.ZMYND8.mESC	1903	874.272	0.0853784	1.12212	198.158	6.95417e-199	196.279	5.26503e-197	194.417	3.82688e-195
GSE84987.PAX5.pro-B-cell	2815	1506.64	0.0517749	0.901798	198.034	9.24948e-199	196.155	6.99235e-197	194.293	5.08999e-195
GSE39756.JUN.Th17	2259	1115.06	0.0681674	1.01857	197.932	1.16966e-198	196.054	8.82913e-197	194.191	6.43666e-195
GSE72164.SUZ12.mESC_2i	923	283.474	0.203933	1.70312	197.705	1.97111e-198	195.828	1.48566e-196	193.965	1.0847e-194
GSE50590.SIN3A.C2C12_MT	1905	876.766	0.221925	1.11953	197.559	2.76007e-198	195.683	2.07722e-196	193.818	1.51887e-194
GSE111433.EZH2.mESC	906	275.005	0.24257	1.72006	197.318	4.81182e-198	195.442	3.61598e-196	193.577	2.64795e-194
GSE56813.GTF2B.heart_TAC	2985	1631.75	0.107347	0.87131	197.284	5.1941e-198	195.409	3.89746e-196	193.544	2.85831e-194
GSE73769.EED.heart	1024	338.081	0.208596	1.59878	197.152	7.04888e-198	195.277	5.28139e-196	193.411	3.879e-194
GSE102517.KLF4.MEF_d5	1748	774.758	0.0975773	1.17389	197.147	7.13651e-198	195.273	5.33914e-196	193.406	3.92722e-194
GSE102517.POU5F1.MEF_d3	1849	841.301	0.066983	1.13605	196.805	1.56698e-197	194.932	1.1706e-195	193.064	8.6231e-194
GSE64489.AFF3.mESC_ab2	2456	1255.01	0.0528138	0.968614	196.617	2.41655e-197	194.744	1.8026e-195	192.876	1.32983e-193
GSE77744.TCF3.B-cell_DSG_FO	2249	1111.53	0.103431	1.01674	196.436	3.6605e-197	194.564	2.72648e-195	192.696	2.01437e-193
GSE98140.KMT2B.mESC_RA	3264	1839.93	0.0632975	0.826986	196.147	7.12817e-197	194.276	5.30153e-195	192.406	3.92263e-193
ENCSR000AID.MYOG.myocyte	1121	393.237	0.0309848	1.51131	196.129	7.43191e-197	194.258	5.51931e-195	192.388	4.08978e-193
GSE55045.CTCF.MC3T3-E1_d28	2119	1023.37	0.0371918	1.05005	196.078	8.35056e-197	194.208	6.19246e-195	192.338	4.59531e-193
GSE103198.CTCFL.3T3-L1	1082	371.508	0.0592293	1.54223	195.964	1.08641e-196	194.094	8.04464e-195	192.223	5.97854e-193
GSE99363.CTCF.cortex_F_CK-KO	2906	1578.2	0.0418581	0.880759	195.88	1.31785e-196	194.011	9.74406e-195	192.14	7.2521e-193
GSE132493.MED24.mESC_clone21	2322	1163.35	0.0399353	0.997077	195.836	1.45793e-196	193.968	1.07641e-194	192.096	8.02301e-193
GSE72164.SUZ12.mESC_2i-d1	1159	415.78	0.146913	1.47899	195.418	3.82141e-196	193.55	2.81729e-194	191.677	2.10292e-192
GSE98140.KMT2D.mESC_WT	3306	1873.36	0.0443895	0.819455	195.383	4.13638e-196	193.516	3.04506e-194	191.643	2.27625e-192
GSE109865.GABPA.liver	2704	1434.49	0.0742103	0.914558	195.158	6.95361e-196	193.291	5.11156e-194	191.417	3.82657e-192
GSE59569.MED1.mESC_OSKM4	1872	859.786	0.0860729	1.12253	195.086	8.20436e-196	193.22	6.02223e-194	191.345	4.51486e-192
GSE63204.STAT1.CD4-pos	1912	887.443	0.183988	1.10736	194.504	3.13435e-195	192.639	2.29737e-193	190.763	1.72483e-191
GSE79770.MBD3.mESC_EGFP-KD	1294	496.258	0.0962368	1.38268	194.305	4.95595e-195	192.44	3.62727e-193	190.564	2.72726e-191
GSE90893.MYC.MEF_48h	2100	1014.27	0.0863274	1.04995	194.302	4.98981e-195	192.438	3.64678e-193	190.561	2.74589e-191
GSE79518.KDM1A.pro-B-cell	1904	883.15	0.103299	1.1083	193.989	1.02479e-194	192.126	7.47885e-193	190.249	5.63944e-191
GSE121660.TBL1X.embryonic-cortical-culture_0kcl	2513	1302.12	0.0855431	0.948553	193.757	1.7482e-194	191.895	1.27399e-192	190.017	9.62037e-191
GSE62437.SUZ12.MLL-AF9_UNC2400	2867	1555.72	0.0716034	0.881958	193.75	1.77932e-194	191.888	1.29479e-192	190.009	9.79159e-191
GSE123870.GFI1.medulloblastoma	2628	1384.21	0.0801024	0.924907	193.591	2.56697e-194	191.729	1.86528e-192	189.85	1.41261e-190
GSE77093.RNF2.mESC_Tam	1325	515.99	0.10578	1.36058	193.494	3.20399e-194	191.634	2.32483e-192	189.754	1.76316e-190
GSE86897.TCF3.pre-B-cell_WT	2089	1008.8	0.0939172	1.05017	193.366	4.30946e-194	191.506	3.12248e-192	189.625	2.3715e-190
GSE109712.BRD4.iPSC_Bipo_I_Y-208-03	2260	1126.21	0.0804242	1.00484	193.305	4.95887e-194	191.445	3.58787e-192	189.564	2.72886e-190
GSE51004.MYC.primary-B-cell_Tg	2803	1511.09	0.0567777	0.891379	193.122	7.55263e-194	191.263	5.45672e-192	189.381	4.15621e-190
GSE44242.CBX3.pre-iPSC	2961	1626.27	0.0421441	0.86452	192.973	1.06524e-193	191.114	7.68529e-192	189.232	5.862e-190
GSE134053.MTF2.mESC_PARETA	1695	748.097	0.0799906	1.17999	192.966	1.08092e-193	191.109	7.7873e-192	189.226	5.94828e-190
GSE67520.POU5F1.MEF_d15	2671	1416.81	0.039393	0.914733	192.865	1.36462e-193	191.008	9.81718e-192	189.124	7.50948e-190
GSE101320.EZH2.BMDM_LPS-2h	1759	790.09	0.144062	1.15467	192.728	1.86883e-193	190.872	1.34255e-191	188.988	1.02842e-189
GSE50534.KMT2D.mESC_EBs	2613	1377.25	0.0484526	0.923916	192.127	7.47183e-193	190.271	5.36006e-191	188.386	4.11175e-189
GSE117287.CHD4.NPC	1808	823.447	0.0385337	1.13465	192.066	8.59643e-193	190.211	6.15808e-191	188.325	4.73062e-189
GSE63271.KDM1A.cortical-neuron_KCl_LSD1n_WT	1631	709.561	0.0800059	1.20076	191.492	3.22163e-192	189.637	2.30456e-190	187.751	1.77286e-188
GSE126496.SP1.mESC	2578	1353.93	0.103153	0.929094	191.485	3.27009e-192	189.632	2.33592e-190	187.745	1.79953e-188
GSE121915.RXRA.liver_TCPOBOP-27h	2628	1389.7	0.0429061	0.919188	191.45	3.54507e-192	189.597	2.52877e-190	187.71	1.95085e-188
GSE121660.NCOR2.embryonic-cortical-culture_2kcl_milipore	2572	1350.12	0.0635156	0.929802	191.305	4.95625e-192	189.452	3.53042e-190	187.564	2.72743e-188
GSE132493.MED24.mESC_clone11	2118	1033.84	0.0388132	1.03469	190.938	1.15397e-191	189.086	8.2084e-190	187.197	6.35032e-188
GSE116855.ZFP143.sperm	2277	1143.63	0.144489	0.99352	190.86	1.38123e-191	189.008	9.81107e-190	187.119	7.60089e-188
GSE107239.PAX5.pro-B-cell_6h	1974	936.386	0.0647128	1.07595	190.825	1.49487e-191	188.975	1.06034e-189	187.085	8.22626e-188
GSE70799.ZFP809.mESC_CRISPR	1595	688.033	0.0448235	1.21301	190.647	2.2539e-191	188.797	1.5965e-189	186.906	1.24032e-187
GSE78708.KMT2D.mESC_Y2602A	2716	1455.04	0.164796	0.900427	190.612	2.44149e-191	188.763	1.72695e-189	186.872	1.34355e-187
GSE95113.RAD21.AML12_shU	1799	820.597	0.0547058	1.13245	190.47	3.38903e-191	188.621	2.39384e-189	186.729	1.86499e-187
GSE132493.MED24.mESC_clone2	2223	1107.41	0.0384529	1.00531	190.329	4.68842e-191	188.481	3.30704e-189	186.588	2.58004e-187
GSE80034.GTF3C1.mESC_shGFP	2988	1653.9	0.0893541	0.853304	190.182	6.57813e-191	188.334	4.6335e-189	186.441	3.61994e-187
GSE139029.ZC3H10.brown-adipose-tissue	3056	1704.12	0.0878464	0.842618	190.092	8.08595e-191	188.245	5.68767e-189	186.352	4.4497e-187
GSE102517.KLF4.mESC	1329	523.537	0.153164	1.34398	190.024	9.45161e-191	188.178	6.63903e-189	186.284	5.20122e-187
GSE126496.SP3.mESC_Sp1-het	3143	1769.44	0.053676	0.82885	189.714	1.93024e-190	187.868	1.35397e-188	185.974	1.06221e-186
GSE121915.RXRA.liver_vehicle-27h	2732	1469.23	0.0419688	0.894894	189.613	2.43759e-190	187.768	1.70748e-188	185.872	1.3414e-186
GSE90635.SATB1.thymocyte_DP	2448	1266.6	0.0694468	0.950641	189.537	2.90453e-190	187.692	2.03175e-188	185.796	1.59836e-186
GSE94300.JARID2.mESC	1442	593.638	0.0676392	1.28042	189.505	3.12544e-190	187.661	2.18325e-188	185.764	1.71993e-186
GSE129478.RAD21.HPC-7_Ery_Luc	2759	1489.05	0.0349245	0.889754	189.497	3.18786e-190	187.653	2.22379e-188	185.756	1.75428e-186
GSE74055.RAD21.mESC_D3	1539	654.648	0.0619465	1.2332	189.379	4.17666e-190	187.536	2.90954e-188	185.639	2.29842e-186
GSE39756.STAT3.Th17	2298	1161.98	0.0840312	0.983791	189.258	5.51522e-190	187.416	3.83672e-188	185.518	3.03502e-186
GSE137491.RPB1.mESC_Zfc3h1-KO	1582	682.339	0.161908	1.21319	189.158	6.9456e-190	187.316	4.82514e-188	185.418	3.82216e-186
GSE66701.CREB1.cortical-neuron_Reelin	2067	1003.51	0.105132	1.04249	188.88	1.31936e-189	187.038	9.15312e-188	185.139	7.26046e-186
GSE134053.RYBP.mESC_PARETA	1216	457.691	0.191015	1.4097	188.855	1.39495e-189	187.015	9.66427e-188	185.115	7.67644e-186
GSE79601.TERF2.testis	2455	1273.48	0.10071	0.946946	188.755	1.75699e-189	186.915	1.21558e-187	185.015	9.66872e-186
GSE109712.BRD4.iPSC_Rod_I_Y-8602	2683	1436.47	0.0784274	0.901319	188.654	2.2175e-189	186.815	1.53209e-187	184.914	1.22029e-185
GSE115965.TET2.AML	2566	1352.84	0.0630777	0.923529	188.562	2.73974e-189	186.723	1.89033e-187	184.822	1.50768e-185
GSE131926.MED24.mESC_b	2609	1383.98	0.0617573	0.914677	188.41	3.89024e-189	186.572	2.68048e-187	184.669	2.1408e-185
GSE90910.PHF8.prostate_MYC_control-diet	2773	1502.19	0.0607768	0.884381	188.385	4.1204e-189	186.548	2.83135e-187	184.644	2.26745e-185
GSE90910.PHF8.prostate_hi-MYC	2773	1502.19	0.0607768	0.884381	188.385	4.1204e-189	186.547	2.8352e-187	184.644	2.26745e-185
GSE107644.SOX30.testis_FRT	521	102.76	0.342989	2.342	188.041	9.09399e-189	186.205	6.24049e-187	184.301	5.00442e-185
GSE137216.CTCFL.lymphoma_mut_BORIS	2517	1319.59	0.0323622	0.931615	187.907	1.23775e-188	186.071	8.48217e-187	184.167	6.81131e-185
GSE135762.CBX7.mESC_UNC3866	1461	608.29	0.12229	1.26412	187.77	1.69912e-188	185.934	1.16282e-186	184.029	9.35026e-185
GSE62482.BRD4.EL4_RA	2278	1151.9	0.0565977	0.983754	187.615	2.42806e-188	185.78	1.65943e-186	183.874	1.33616e-184
GSE101646.PHIP.v6-5_MLL2-CRISPR	1503	635.133	0.0604148	1.24272	187.478	3.32528e-188	185.644	2.26956e-186	183.738	1.8299e-184
GSE108945.SPI1.AML_KO-D4	2272	1148.1	0.124856	0.98472	187.453	3.52346e-188	185.62	2.40158e-186	183.712	1.93896e-184
GSE99195.TOP2A.MEF	2442	1267.54	0.050465	0.946031	187.441	3.61929e-188	185.608	2.46358e-186	183.701	1.9917e-184
GSE104129.CTCF.liver_5AM	2220	1112.31	0.0350285	0.997006	187.292	5.10906e-188	185.459	3.47296e-186	183.551	2.81152e-184
GSE61198.SNAI1-2.breast-cancer	2460	1280.68	0.11382	0.941749	187.284	5.1997e-188	185.452	3.52983e-186	183.543	2.8614e-184
GSE113306.PAX5.pre-B-cell	2237	1124.25	0.0883073	0.992597	187.23	5.88921e-188	185.399	3.99255e-186	183.489	3.24083e-184
GSE110896.MED1.hematopoietic-progenitor_DMSO	1926	911.783	0.154525	1.07885	187.117	7.64145e-188	185.286	5.17353e-186	183.376	4.20509e-184
GSE57926.RBFOX2.MEF_siSUZ12	3122	1761.74	0.0874706	0.825473	187.072	8.47571e-188	185.242	5.73068e-186	183.331	4.66418e-184
GSE67868.RNF2.mesoderm-precursor	1339	534.268	0.15805	1.32552	186.94	1.14701e-187	185.111	7.74493e-186	183.2	6.312e-184
GSE108689.NR3C1.liver_ZT20	960	314.951	0.330465	1.60791	186.728	1.86928e-187	184.899	1.26051e-185	182.988	1.02867e-183
GSE46762.RARA.liver	2473	1291.3	0.0726072	0.937442	186.727	1.87559e-187	184.899	1.26308e-185	182.986	1.03214e-183
GSE44588.MYBL1.testis	1160	427.866	0.103868	1.43889	186.658	2.19756e-187	184.83	1.47793e-185	182.917	1.20931e-183
GSE53736.RARA.liver	2473	1291.69	0.0726029	0.937007	186.572	2.6819e-187	184.744	1.80127e-185	182.831	1.47585e-183
GSE94130.BRD4.lymphoma	1840	855.87	0.129806	1.10424	186.325	4.72832e-187	184.499	3.17152e-185	182.585	2.60199e-183
GSE125116.SMAD3.EBs_SB431542	3366	1947.12	0.0538302	0.789694	185.985	1.03568e-186	184.159	6.93765e-185	182.244	5.69937e-183
GSE118399.RNF2.mESC_72h	1231	470.743	0.12734	1.38682	185.889	1.29144e-186	184.064	8.63939e-185	182.148	7.10678e-183
GSE87037.BRD4.iPSC_Y-7602	3151	1787.3	0.0537044	0.818027	185.721	1.90254e-186	183.896	1.27107e-184	181.98	1.04697e-182
GSE103057.IRF4.small-pre-B	2148	1066.12	0.147285	1.01062	185.699	1.99765e-186	183.875	1.33285e-184	181.959	1.09931e-182
GSE125340.IRF5.CD8-pos_CpG	2696	1453.93	0.062973	0.890861	185.626	2.36754e-186	183.802	1.57756e-184	181.885	1.30286e-182
GSE68195.YY1.mESC_shLuc	2433	1265.81	0.0587142	0.94268	185.576	2.65383e-186	183.753	1.766e-184	181.836	1.4604e-182
GSE120302.RNF2.mESC	1945	927.905	0.114641	1.06772	185.52	3.02074e-186	183.697	2.00752e-184	181.779	1.66231e-182
GSE82144.CHD4.B-cell_resting	2860	1573.5	0.0683001	0.862038	185.489	3.24523e-186	183.667	2.15388e-184	181.748	1.78585e-182
GSE81887.CBFB.CD8	1773	813.471	0.156335	1.12403	185.302	4.99173e-186	183.48	3.30871e-184	181.561	2.74695e-182
GSE48122.RNF2.mESC_ctrl	1527	654.056	0.102932	1.22321	185.281	5.24084e-186	183.46	3.46928e-184	181.54	2.88403e-182
GSE131926.MED1.mESC_a_4OHT	2710	1466.05	0.0573278	0.88636	184.889	1.29234e-185	183.068	8.54374e-184	181.148	7.11176e-182
GSE62736.BRD2.G1E_GATA1-ER_HA	2739	1487.21	0.070292	0.881039	184.835	1.46379e-185	183.015	9.66454e-184	181.094	8.05523e-182
GSE92745.SMC1A.epiblast-cell_KO	1297	512.476	0.044718	1.33962	184.464	3.43795e-185	182.645	2.26692e-183	180.723	1.8919e-181
GSE104129.CTCF.liver_5PM	2221	1119.74	0.0322136	0.988048	184.391	4.06861e-185	182.572	2.67927e-183	180.65	2.23896e-181
GSE68195.YY1.mESC_shExos3	2438	1272.75	0.0621844	0.937744	184.216	6.07926e-185	182.398	3.99812e-183	180.476	3.34541e-181
GSE92407.YY1.mESC_EpiLSC	2434	1270.18	0.0726632	0.938291	184.109	7.78045e-185	182.292	5.1103e-183	180.368	4.28158e-181
GSE109712.BRD4.iPSC_Cone_I_Y-209-12	2349	1210.73	0.100239	0.956165	183.839	1.44955e-184	182.022	9.50845e-183	180.098	7.97686e-181
GSE97945.CBX1.mESC_Cbx3-KO	2072	1018.72	0.0341025	1.02426	183.507	3.10935e-184	181.691	2.03697e-182	179.767	1.71108e-180
GSE106319.SRF.NPC_overexpression	3300	1905.46	0.0456691	0.792327	183.479	3.31816e-184	181.663	2.17095e-182	179.739	1.82598e-180
GSE76042.MYC.liver_WT	2036	994.797	0.111893	1.03326	183.17	6.76617e-184	181.354	4.42113e-182	179.429	3.72342e-180
GSE79320.TEAD4.hematopoietic-cell_min-Dox	1896	899.878	0.0300828	1.07516	183.122	7.55418e-184	181.307	4.92967e-182	179.381	4.15707e-180
GSE71698.IRF4.plasmablast	2594	1387.07	0.0808301	0.903138	183.118	7.6139e-184	181.304	4.96224e-182	179.378	4.18993e-180
GSE103255.RUNX1-ETO.spleen	3114	1767.66	0.0742029	0.816928	183.115	7.67631e-184	181.301	4.99647e-182	179.374	4.22427e-180
GSE51511.TFAP2C.trophoblast-stem-cell_ZHBTc4	1450	609.305	0.0880175	1.25082	182.985	1.03572e-183	181.172	6.73276e-182	179.244	5.69955e-180
GSE50590.ING1.C2C12_MB	1295	513.941	0.24165	1.33328	182.685	2.06475e-183	180.873	1.34048e-181	178.945	1.13623e-179
GSE109965.RELA.BMDM	2829	1559.24	0.0454399	0.859448	182.505	3.1262e-183	180.693	2.027e-181	178.764	1.72035e-179
GSE117155.SUPT16.mESC_d5	1995	968.656	0.0785804	1.04233	182.317	4.81847e-183	180.506	3.12026e-181	178.576	2.65161e-179
GSE37151.SMARCA4.face	2667	1441.94	0.0526461	0.887203	182.295	5.06764e-183	180.484	3.27741e-181	178.555	2.78872e-179
GSE48122.RNF2.mESC_Rest-KO	1386	570.508	0.103587	1.28061	182.267	5.40349e-183	180.457	3.49015e-181	178.527	2.97354e-179
GSE126398.ISL1.cardiomyocyte_E8-25-E9-0	589	134.851	0.0747842	2.1269	182.192	6.42411e-183	180.383	4.14408e-181	178.452	3.53519e-179
GSE90635.SATB1.thymocyte_CD4	2419	1264.44	0.0718572	0.935914	182.157	6.96589e-183	180.348	4.48785e-181	178.416	3.83333e-179
GSE97114.PPARG.brown-adipose-tissue_WT	2335	1205.07	0.036803	0.954302	182.119	7.60554e-183	180.31	4.89372e-181	178.378	4.18533e-179
GSE144496.TRP73.Th1_DN	2107	1045.99	0.0604869	1.01032	182.094	8.05059e-183	180.286	5.17351e-181	178.354	4.43024e-179
GSE63271.KDM1A.cortical-neuron	1857	876.126	0.092232	1.08376	181.933	1.16782e-182	180.125	7.49516e-181	178.192	6.42651e-179
GSE98724.MED1.intestinal-villus-epithelial-cell_WT	2544	1354.34	0.0761563	0.909511	181.904	1.24598e-182	180.098	7.98668e-181	178.164	6.85663e-179
GSE77636.SETDB1.pro-B-cell	1619	719.225	0.0539685	1.17059	181.841	1.44168e-182	180.035	9.2294e-181	178.101	7.93357e-179
GSE131926.MED24.mESC_a	2584	1384.41	0.0586327	0.900335	181.404	3.94216e-182	179.599	2.52051e-180	177.664	2.16937e-178
GSE130599.CBFB.CD4-pos	2297	1180.61	0.0758386	0.960214	181.171	6.74831e-182	179.366	4.30925e-180	177.43	3.7136e-178
GSE87180.STAT3.AtT-20_Pax7	2181	1099.85	0.0619514	0.987682	180.984	1.03823e-181	179.179	6.62144e-180	177.243	5.71339e-178
GSE98119.NIPBL.B-cell_activated_HU	2840	1572.24	0.0385917	0.853067	180.762	1.7311e-181	178.958	1.10264e-179	177.021	9.52624e-178
GSE109712.BRD4.iPSC_MullFibr_F_N-FCR02	1337	542.635	0.212695	1.30095	180.741	1.8143e-181	178.938	1.15418e-179	177.001	9.98409e-178
GSE40463.EP300.Th2_STAT6-KO_ctrl	2895	1613.31	0.0421385	0.843536	180.528	2.96404e-181	178.725	1.88323e-179	176.788	1.63111e-177
GSE113157.GPS2.liver_NCOR1-WT	2303	1188.55	0.0324815	0.954315	179.652	2.22633e-180	177.85	1.41274e-178	175.912	1.22515e-176
GSE98119.NIPBL.B-cell_activated	2678	1457.4	0.0464745	0.877758	179.549	2.82164e-180	177.748	1.78826e-178	175.809	1.55275e-176
GSE82144.KMT2A.B-cell_activated	2748	1508.47	0.0588802	0.865296	179.512	3.07333e-180	177.711	1.94534e-178	175.772	1.69126e-176
GSE109712.BRD4.iPSC_Mull_M_Y-Cr143-01	2164	1092.18	0.080491	0.98649	179.202	6.28233e-180	177.401	3.97157e-178	175.461	3.45717e-176
GSE85717.EZH2.mESC_ES-WT	1291	516.824	0.112027	1.32074	179.191	6.43925e-180	177.391	4.0657e-178	175.451	3.54352e-176
GSE62482.TBX21.EL4	2360	1230.29	0.0320901	0.939789	179.077	8.37098e-180	177.277	5.27878e-178	175.337	4.60655e-176
ENCSR000ETN.MXI1.MEL	2474	1313.05	0.0887629	0.913923	178.492	3.22314e-179	176.693	2.03e-177	174.751	1.77369e-175
GSE131014.ZIC2.mESC_Zfp281-KO	1504	652.502	0.128229	1.20475	177.753	1.76695e-178	175.954	1.11148e-176	174.012	9.72353e-175
GSE112311.SUZ12.mESC_3aKO	1150	434.388	0.15895	1.40458	177.604	2.48847e-178	175.806	1.56339e-176	173.863	1.36941e-174
GSE42900.NFIB.HFSC	2915	1636.71	0.0471263	0.832699	177.565	2.72295e-178	175.767	1.70859e-176	173.824	1.49844e-174
GSE76619.CREB1_PHOSPHO.brown-preadipocyte_cre-4h	2246	1153.79	0.073957	0.96098	177.441	3.61954e-178	175.644	2.26836e-176	173.701	1.99183e-174
GSE62482.MED1.EL4_GFP_RA	2279	1177.71	0.0524306	0.952421	177.17	6.76081e-178	175.373	4.23174e-176	173.429	3.72048e-174
GSE91038.PRDM1.plasmablast	2489	1327.32	0.0648177	0.907051	177.149	7.09785e-178	175.353	4.43721e-176	173.408	3.90594e-174
GSE113054.BHLHE40.bone-marrow_Th1	1650	748.573	0.0956466	1.14025	176.967	1.07943e-177	175.171	6.73974e-176	173.226	5.94013e-174
GSE122715.SUZ12.mESC-E14_PCGF1-KO	1231	483.961	0.156616	1.34687	176.805	1.56702e-177	175.01	9.77207e-176	173.064	8.62333e-174
GSE62482.MED1.EL4_RA	2296	1191.58	0.0527586	0.946247	176.417	3.83219e-177	174.622	2.38684e-175	172.676	2.10886e-173
GSE99530.RNF2.mESC_KO	964	329.169	0.187184	1.55021	176.332	4.65133e-177	174.539	2.89347e-175	172.592	2.55963e-173
GSE76619.CREB1_PHOSPHO.brown-preadipocyte_vec-2-4h	2124	1071.29	0.0763068	0.987433	176.223	5.98713e-177	174.429	3.71986e-175	172.482	3.29472e-173
GSE40918.EP300.Th17_Batf-neg-neg	2209	1130.87	0.0602071	0.965956	176.164	6.86117e-177	174.371	4.25767e-175	172.423	3.7757e-173
GSE62482.BRD4.EL4_GFP_RA	2289	1187.47	0.0564502	0.946826	176.076	8.38575e-177	174.284	5.19737e-175	172.336	4.61468e-173
GSE67516.SMC1A.fibroblast	1622	732.387	0.0452479	1.1471	175.829	1.48407e-176	174.037	9.18682e-175	172.088	8.16685e-173
GSE120063.FLI1.MLL-AF9	2483	1326.56	0.0794128	0.90439	175.797	1.59561e-176	174.006	9.8652e-175	172.056	8.78065e-173
GSE74055.RAD21.mESC_D1	1476	638.144	0.0874615	1.20974	175.738	1.82737e-176	173.948	1.12843e-174	171.998	1.0056e-172
GSE48122.SUZ12.mESC_Rest-KO	1372	572.513	0.084146	1.2609	175.669	2.14084e-176	173.879	1.32039e-174	171.929	1.17811e-172
GSE98723.CBX6.mESC	1147	435.414	0.157404	1.3974	175.603	2.49315e-176	173.814	1.53581e-174	171.863	1.37198e-172
GSE120063.FLI1.MLL-AF9_KO	2457	1308.53	0.0854549	0.908951	175.552	2.80399e-176	173.763	1.72519e-174	171.812	1.54303e-172
GSE84987.PAX5.pro-B-cell_26601	2444	1302.54	0.0656989	0.90792	174.278	5.27364e-175	172.489	3.24073e-173	170.537	2.90208e-171
GSE130213.NIPBL.pro-B-cell	2987	1700.48	0.054245	0.812756	174.098	7.97147e-175	172.31	4.89264e-173	170.358	4.3867e-171
GSE79606.EPOP.mESC	1217	479.64	0.130495	1.3433	174.022	9.49619e-175	172.235	5.8214e-173	170.282	5.22576e-171
GSE62482.BRD4.Th1	1556	692.821	0.0345149	1.16729	173.978	1.05146e-174	172.191	6.43788e-173	170.238	5.78616e-171
GSE90794.CBFB.liver_E12-5_lin-neg_CBFB1	1984	979.529	0.0852637	1.01825	173.968	1.07721e-174	172.181	6.58762e-173	170.227	5.92791e-171
GSE50806.GFI1.lymphocyte	2576	1398.79	0.0471648	0.880952	173.912	1.22403e-174	172.126	7.47643e-173	170.172	6.73585e-171
GSE33802.TBX21.Th1	2473	1324.81	0.0372311	0.900475	173.739	1.8259e-174	171.953	1.11392e-172	169.998	1.0048e-170
GSE99319.RELA.Treg	1394	589.574	0.217473	1.24149	173.721	1.89951e-174	171.937	1.15743e-172	169.981	1.0453e-170
GSE118399.RNF2.mESC_12h	1305	534.316	0.10695	1.28828	173.508	3.10465e-174	171.724	1.88949e-172	169.767	1.70849e-170
GSE70661.GTF2B.mESC_EB8-WT	2131	1082.75	0.166458	0.976836	173.435	3.67628e-174	171.651	2.23469e-172	169.694	2.02306e-170
GSE99195.CTCF.primary-B-cell_resting	2785	1553.91	0.0358015	0.841771	173.081	8.29165e-174	171.298	5.03417e-172	169.341	4.5629e-170
GSE87180.STAT3.AtT-20	2643	1450.27	0.0442981	0.865856	172.924	1.19177e-173	171.141	7.22702e-172	169.183	6.55832e-170
GSE99101.BRD4.preadipocyte_d2_MLL3-KO	2126	1080.67	0.0346012	0.976213	172.835	1.46065e-173	171.053	8.84692e-172	169.095	8.03797e-170
GSE28325.SUZ12.mESC_Pcl3-sh	1166	450.842	0.118304	1.37087	172.723	1.894e-173	170.941	1.14579e-171	168.982	1.04227e-169
GSE79770.MBD2.mESC_EGFP-KD	3406	2020.95	0.0494598	0.753042	172.584	2.60647e-173	170.803	1.57492e-171	168.843	1.43434e-169
GSE122715.PCGF6.mESC-E14_PCGF2-4-KO	2141	1091.91	0.0907473	0.971425	172.524	2.99078e-173	170.744	1.80498e-171	168.784	1.64583e-169
GSE116603.SUZ12.mESC	1091	406.68	0.171379	1.42369	172.521	3.01454e-173	170.741	1.81715e-171	168.78	1.6589e-169
GSE97869.EZH2.erythroid_D839	654	172.246	0.30791	1.92482	171.978	1.05188e-172	170.198	6.33314e-171	168.237	5.7885e-169
GSE132752.RNF2.mESC	2234	1158.99	0.0992668	0.946762	171.869	1.35181e-172	170.09	8.12927e-171	168.128	7.43901e-169
GSE77093.RNF2.mESC_Y860H	1111	419.506	0.120095	1.4051	171.754	1.76053e-172	169.976	1.05746e-170	168.014	9.68821e-169
GSE115965.TET2.hematopoietic-cell	2682	1482.4	0.0527735	0.855376	171.64	2.28953e-172	169.862	1.37357e-170	167.9	1.25993e-168
GSE69798.CTCF.MEF	2021	1010.45	0.0314225	1.00007	171.602	2.50241e-172	169.824	1.49951e-170	167.861	1.37708e-168
GSE121279.FOXP1.lymphocyte_Treg	1568	705.063	0.144197	1.1531	171.598	2.52465e-172	169.821	1.51104e-170	167.857	1.38931e-168
GSE124741.RNF2.MEF	745	217.716	0.202281	1.7748	171.253	5.59067e-172	169.476	3.34214e-170	167.512	3.07654e-168
GSE48878.TCF3.HFSC	1639	752.491	0.0432979	1.12307	171.182	6.5784e-172	169.406	3.92797e-170	167.441	3.62009e-168
GSE74826.NR3C1.mammary-gland_L1_Wap-delE1a-E2	2818	1584.06	0.0360303	0.831044	171.1	7.93859e-172	169.325	4.73456e-170	167.36	4.36861e-168
GSE99895.RELA.BMDM_2h	2105	1070.12	0.0579283	0.976051	171.096	8.02275e-172	169.321	4.77911e-170	167.355	4.41492e-168
GSE49766.CHD4.MEF_DOX-8d	1866	905.116	0.0955257	1.04377	171.066	8.59243e-172	169.291	5.11245e-170	167.325	4.72842e-168
GSE106730.IRF5.CD8-pos	1990	990.881	0.135957	1.00599	170.776	1.67476e-171	169.002	9.95301e-170	167.035	9.21619e-168
GSE87037.BRD4.retina_N-P10	2256	1177.77	0.0894174	0.937704	170.588	2.58444e-171	168.814	1.53412e-169	166.847	1.42222e-167
GSE131947.FOXO1.pancreatic-islets	2193	1133.54	0.106348	0.952073	170.442	3.61335e-171	168.669	2.14236e-169	166.701	1.98843e-167
GSE110950.HOPX.TSC_differentiated	1705	798.09	0.092653	1.09515	170.297	5.04533e-171	168.525	2.98788e-169	166.557	2.77645e-167
GSE75722.MAFB.BMDM	1980	985.731	0.0436498	1.00623	170.002	9.9577e-171	168.23	5.89013e-169	166.261	5.47972e-167
GSE86897.IKZF1.pre-B-cell	2817	1587.18	0.0490109	0.827691	169.795	1.60487e-170	168.023	9.48197e-169	166.054	8.83162e-167
GSE112153.RAD21.mOSN	1530	684.118	0.0547563	1.16122	169.55	2.81626e-170	167.779	1.66197e-168	165.81	1.54979e-166
GSE131327.MEF2C.heart_neonatal	2289	1203.94	0.0301422	0.926957	169.525	2.98622e-170	167.754	1.76021e-168	165.784	1.64331e-166
GSE110305.REST.bone-marrow_bcl11-KO	2325	1229.84	0.0986507	0.918763	169.447	3.57239e-170	167.677	2.10328e-168	165.706	1.96589e-166
GSE24852.HDAC2.myoblast	1624	746.246	0.0338601	1.12183	169.303	4.97279e-170	167.534	2.92438e-168	165.563	2.73652e-166
GSE125595.CTCF.mESC_ZF1d_Rescue	1631	750.878	0.0261395	1.11911	169.302	4.98825e-170	167.533	2.93006e-168	165.561	2.74503e-166
GSE104045.FLI1.hemogenic-endothelium_Dox-JQ1	1821	878.554	0.060779	1.05153	169.184	6.55116e-170	167.415	3.84364e-168	165.443	3.60511e-166
GSE68821.WDR5.MLL-AF9_DMSO	1628	749.191	0.0979071	1.1197	169.15	7.07869e-170	167.382	4.14834e-168	165.409	3.8954e-166
GSE31785.YY1.mESC	2293	1208.23	0.0853019	0.924346	168.963	1.08947e-169	167.195	6.37723e-168	165.222	5.99534e-166
GSE111871.RUNX3.lung	2436	1310.98	0.0629474	0.893864	168.917	1.21021e-169	167.15	7.07579e-168	165.177	6.65976e-166
GSE17067.E2F4.3T3	1635	754.395	0.24251	1.1159	168.86	1.38144e-169	167.093	8.06763e-168	165.119	7.60206e-166
GSE43229.POU5F1.mESC_KDM4B-KO	1619	744.032	0.0601434	1.12167	168.745	1.7976e-169	166.979	1.04859e-167	165.005	9.8922e-166
GSE77744.TCF3.B-cell_DSG_anti-CD40	1662	772.687	0.0549131	1.10496	168.674	2.11679e-169	166.909	1.23336e-167	164.934	1.16487e-165
GSE137978.NR3C1.liver_High-Fat-diet_sc	2236	1169.54	0.0610046	0.934978	168.214	6.11284e-169	166.449	3.55349e-167	164.473	3.36389e-165
GSE137978.NR3C1.liver_High-Fat-diet_pt	2236	1169.54	0.0610046	0.934978	168.214	6.11284e-169	166.449	3.55758e-167	164.473	3.36389e-165
GSE129478.RAD21.HPC-7_Ery_shStag2	2472	1338.95	0.0342022	0.884573	168.2	6.31367e-169	166.436	3.66602e-167	164.459	3.47441e-165
GSE108583.RAD21.BMDM_LPS-6h	2478	1343.33	0.0416555	0.883363	168.189	6.46788e-169	166.426	3.75126e-167	164.449	3.55928e-165
GSE126659.RNF2.mESC_5-per-human-chrom_SA2-depleted	934	322.505	0.184112	1.5341	167.925	1.18821e-168	166.162	6.88352e-167	164.185	6.53872e-165
GSE81897.PBX1.limb_E12-5	2448	1322.48	0.057554	0.888355	167.866	1.3614e-168	166.104	7.87781e-167	164.125	7.49177e-165
GSE86897.MED1.pre-B-cell_IKDN	1992	998.968	0.133557	0.995707	167.856	1.39264e-168	166.094	8.04939e-167	164.116	7.6637e-165
GSE131926.MED1.mESC_a	2584	1421.49	0.0595529	0.862199	167.82	1.51441e-168	166.058	8.74322e-167	164.079	8.33381e-165
GSE131926.MED24.mESC_b_4OHT	2737	1533.88	0.0509788	0.835407	167.814	1.53541e-168	166.053	8.85434e-167	164.073	8.44935e-165
GSE109965.RELA.BMDM_KLA_PWK	2362	1261.48	0.0379566	0.904894	167.486	3.26547e-168	165.726	1.88097e-166	163.745	1.79699e-164
GSE131926.MED1.mESC_b	2560	1405.19	0.0605373	0.865374	167.382	4.14736e-168	165.622	2.38624e-166	163.642	2.28229e-164
GSE69543.SF1.uterus	2424	1306.46	0.0671859	0.891722	167.371	4.25322e-168	165.612	2.44437e-166	163.631	2.34055e-164
GSE79813.RUNX2.MSC_veh_adipogenic	2515	1372.51	0.0469357	0.873739	167.344	4.52804e-168	165.585	2.59936e-166	163.603	2.49178e-164
GSE46241.EGR2.CD4-pos	1930	957.528	0.19058	1.01121	167.213	6.11744e-168	165.455	3.50779e-166	163.473	3.36643e-164
GSE103685.SUZ12.mESC	751	224.779	0.189646	1.74031	167.11	7.76047e-168	165.352	4.44487e-166	163.37	4.27059e-164
GSE90635.SATB1.thymocyte	2624	1453.42	0.0442145	0.852319	166.887	1.29798e-167	165.129	7.42586e-166	163.146	7.14277e-164
GSE39756.IRF4.Th17	1866	914.435	0.063673	1.029	166.803	1.57314e-167	165.046	8.9899e-166	163.063	8.65697e-164
GSE90794.CBFB.thymocyte_pan-CBFB	2618	1449.85	0.04674	0.852558	166.594	2.54881e-167	164.837	1.45491e-165	162.853	1.40261e-163
GSE45914.SPI1.macrophage	1433	626.94	0.0821345	1.19264	166.496	3.19073e-167	164.74	1.81927e-165	162.756	1.75586e-163
GSE104129.BRD4.liver_5PM	2597	1434.8	0.0524646	0.856	166.476	3.33868e-167	164.721	1.90149e-165	162.736	1.83728e-163
GSE84987.PAX5.pro-B-cell_26598	1439	630.875	0.0904178	1.18964	166.454	3.51912e-167	164.699	2.002e-165	162.713	1.93657e-163
GSE76303.NIPBL.MEF	1856	908.754	0.0511422	1.03024	166.273	5.33214e-167	164.519	3.03001e-165	162.532	2.93428e-163
GSE74826.NR3C1.mammary-gland_L1_Wap-delE1a-E2-3	2443	1323.27	0.0494074	0.884548	166.239	5.76462e-167	164.485	3.27208e-165	162.499	3.17227e-163
GSE124463.HNF4A.liver_LFD	2572	1417.52	0.0386418	0.85952	166.115	7.67284e-167	164.361	4.35034e-165	162.374	4.22237e-163
GSE110305.REST.bone-marrow	2617	1450.74	0.0685204	0.851121	166.025	9.44584e-167	164.272	5.3496e-165	162.284	5.19805e-163
GSE122715.RNF2.mESC-E14_PCGF3-5-KO	1210	487.773	0.148357	1.31073	165.88	1.31952e-166	164.127	7.46466e-165	162.139	7.26131e-163
GSE41720.TET2.mESC	670	185.209	0.291558	1.85501	165.826	1.4928e-166	164.074	8.43547e-165	162.085	8.21485e-163
GSE104155.BRD4.skeletal-muscle	2522	1382.07	0.142752	0.867735	165.735	1.83967e-166	163.984	1.0384e-164	161.995	1.01237e-162
GSE99195.CTCF.primary-T-cell	2375	1277.35	0.0315552	0.894775	165.034	9.24652e-166	163.283	5.21336e-164	161.293	5.08836e-162
GSE114172.ASCL1.EBs_Dox-48H	2438	1323.02	0.0353728	0.881859	164.997	1.0064e-165	163.247	5.66798e-164	161.257	5.53825e-162
GSE134053.EPOP.mESC_I53S72	914	314.884	0.185735	1.53737	164.962	1.09025e-165	163.212	6.13337e-164	161.222	5.99966e-162
GSE53362.EP300.pre-B-cell_0h	2084	1070.36	0.0954868	0.961264	164.862	1.37505e-165	163.112	7.72694e-164	161.121	7.56689e-162
GSE53736.RARA.liver_RA	2370	1274.34	0.0489265	0.895138	164.81	1.54769e-165	163.061	8.68745e-164	161.07	8.51696e-162
GSE118399.RNF2.mESC_0h	1262	522.078	0.108429	1.27337	164.513	3.06976e-165	162.764	1.72119e-163	160.772	1.68929e-161
GSE86897.IRF4.pre-B-cell_WT	2098	1081.15	0.0930542	0.956449	164.478	3.33042e-165	162.729	1.86527e-163	160.737	1.83273e-161
GSE74330.RNF2.mESC	1208	488.87	0.106903	1.3051	164.386	4.11308e-165	162.638	2.30107e-163	160.645	2.26343e-161
GSE83960.SMC1A.bone-marrow	3003	1743.57	0.0475791	0.784364	164.091	8.10148e-165	162.344	4.52739e-163	160.351	4.45825e-161
GSE74055.RAD21.mESC_D2	1326	563.277	0.0612471	1.23516	163.882	1.31307e-164	162.135	7.3298e-163	160.141	7.22583e-161
GSE99101.BRD4.preadipocyte_d0_KO	767	236.349	0.0353261	1.69831	163.858	1.38782e-164	162.111	7.73851e-163	160.117	7.63717e-161
GSE137978.NR3C1.liver_control-diet_sc	2214	1165.16	0.0619197	0.926127	163.767	1.70976e-164	162.022	9.51271e-163	160.026	9.40883e-161
GSE137978.NR3C1.liver_control-diet_pt	2214	1165.16	0.0619197	0.926127	163.767	1.70976e-164	162.021	9.52319e-163	160.026	9.40883e-161
GSE58323.TRIM28.J1	1689	800.859	0.0260443	1.07655	163.704	1.97632e-164	161.959	1.09837e-162	159.964	1.08757e-160
GSE68195.YY1.mESC_DRB	2021	1029.02	0.0847344	0.973798	163.666	2.15656e-164	161.922	1.19722e-162	159.926	1.18675e-160
GSE104129.BRD4.liver_5PM_NR1D1-KO	2530	1393.85	0.0550431	0.860059	163.616	2.41997e-164	161.872	1.34198e-162	159.876	1.33171e-160
GSE111526.NR3C1.liver	1962	988.333	0.100036	0.989256	163.457	3.49206e-164	161.713	1.93439e-162	159.716	1.92168e-160
GSE53362.EP300.pre-B-cell_3h	2262	1200.31	0.0770383	0.914189	163.437	3.65233e-164	161.694	2.02095e-162	159.697	2.00988e-160
GSE90016.WT1.kidney_E16-5	1045	392.46	0.0574555	1.41289	163.196	6.36258e-164	161.454	3.51677e-162	159.456	3.50133e-160
GSE100096.SMARCA4.MEF	660	182.635	0.283993	1.8535	163.164	6.85483e-164	161.422	3.78471e-162	159.423	3.77221e-160
GSE63778.NIPBL.Th17	942	332.937	0.106393	1.50048	163.128	7.44902e-164	161.386	4.1083e-162	159.387	4.0992e-160
GSE125139.NCAPH2.MEF_RB1L-L	2321	1243.58	0.0522642	0.900248	163.097	7.99123e-164	161.356	4.40253e-162	159.357	4.39757e-160
GSE132752.SUZ12.mESC	913	317.265	0.148046	1.52493	162.541	2.87693e-163	160.8	1.58324e-161	158.8	1.58318e-159
GSE99597.BCL11B.thymocyte	2409	1308.9	0.0789422	0.880081	162.466	3.42131e-163	160.726	1.88078e-161	158.725	1.88275e-159
GSE104129.MED1.liver_5PM_NR1D1-KO	2289	1222.75	0.0547791	0.904586	162.267	5.41362e-163	160.527	2.97276e-161	158.526	2.97911e-159
GSE22934.WDR5.mESC_FL	1249	517.858	0.0931811	1.27014	162.124	7.50796e-163	160.385	4.11835e-161	158.384	4.13163e-159
GSE118244.SOX2.KPS	3476	2111.27	0.0518543	0.71932	161.967	1.07984e-162	160.228	5.91682e-161	158.226	5.94234e-159
GSE89743.FOXP3.Treg_A384T	2664	1497.22	0.0395887	0.831306	161.94	1.1486e-162	160.202	6.28678e-161	158.199	6.32074e-159
GSE63778.SMC1A.Th17	993	363.861	0.0462829	1.44841	161.866	1.36021e-162	160.129	7.43695e-161	158.126	7.48521e-159
GSE83757.CEBPA.brown-adipocyte_d6	1224	502.753	0.127076	1.28368	161.854	1.40119e-162	160.116	7.65273e-161	158.113	7.71072e-159
GSE108634.SMARCA4.adenocarcinoma_tetra_DEX	2843	1631.19	0.0580571	0.801487	161.652	2.23065e-162	159.915	1.21698e-160	157.911	1.22753e-158
GSE74055.MED12.mESC_D0_DKO	1333	572.206	0.193525	1.22007	161.259	5.51013e-162	159.522	3.00293e-160	157.518	3.03223e-158
GSE110305.REST.bone-marrow_shBcl11b	1671	794.132	0.172535	1.07326	161.109	7.78581e-162	159.373	4.23857e-160	157.368	4.28453e-158
GSE99895.RELA.BMDM_2h_Irf3-KO	1798	880.977	0.0544568	1.02922	160.852	1.40512e-161	159.117	7.6412e-160	157.112	7.73236e-158
GSE84115.STAT3.mammary-gland_I12	2155	1130.69	0.0634514	0.930484	160.795	1.60269e-161	159.06	8.70626e-160	157.055	8.81961e-158
GSE41920.RUNX2.MC3T3-E1	2622	1469.83	0.0453979	0.835016	160.702	1.98463e-161	158.968	1.07695e-159	156.962	1.09214e-157
GSE69859.SOX2.NSC_ctrl	1592	742.217	0.0269178	1.10093	160.612	2.44446e-161	158.878	1.32505e-159	156.871	1.34519e-157
GSE133025.CREB1.kidney	2868	1654.08	0.0406503	0.794015	160.312	4.87146e-161	158.579	2.63781e-159	156.572	2.68077e-157
GSE81081.SIN3A.mESC	2011	1030.11	0.167653	0.965109	160.286	5.17191e-161	158.553	2.79751e-159	156.546	2.8461e-157
GSE79874.BCL11B.thymocyte_EGS	2463	1354.36	0.0679673	0.862809	160.25	5.62962e-161	158.517	3.04183e-159	156.509	3.09798e-157
GSE83790.NR1D1.liver_Hnf6-KO	2751	1567.86	0.0396632	0.811159	159.914	1.21821e-160	158.182	6.57528e-159	156.174	6.70381e-157
GSE50126.RUNX3.spleen	1940	981.549	0.0611274	0.982924	159.81	1.54986e-160	158.078	8.35646e-159	156.069	8.5289e-157
GSE50590.KMT2A.C2C12_MB	719	215.603	0.174515	1.73761	159.664	2.16614e-160	157.933	1.16668e-158	155.924	1.19202e-156
ENCSR000ETU.NELFE.MEL	1981	1010.6	0.132049	0.97102	159.649	2.24413e-160	157.918	1.2074e-158	155.908	1.23495e-156
GSE132752.SUZ12.mESC_TAM	672	191.821	0.211122	1.8087	159.559	2.75775e-160	157.829	1.48217e-158	155.819	1.51759e-156
ENCSR000ETC.SIN3A.MEL	2692	1525.61	0.0766275	0.819297	159.375	4.21312e-160	157.646	2.26196e-158	155.635	2.31848e-156
GSE126800.IRF4.spleen	1709	823.496	0.0932809	1.05332	159.369	4.27327e-160	157.64	2.29182e-158	155.629	2.35158e-156
GSE109965.RUNX1.BMDM_KLA_B6	2284	1227.01	0.0412274	0.896412	159.301	4.99817e-160	157.572	2.67776e-158	155.561	2.7505e-156
GSE104129.MED1.liver_5PM	2337	1266.18	0.0523522	0.884175	158.984	1.03837e-159	157.255	5.55717e-158	155.243	5.71418e-156
GSE131926.MED1.mESC_b_4OHT	2624	1476.5	0.0488513	0.82959	158.941	1.14555e-159	157.213	6.12428e-158	155.2	6.30397e-156
GSE53362.EP300.pre-B-cell_24h	1937	981.713	0.097952	0.98045	158.852	1.40696e-159	157.124	7.51389e-158	155.111	7.74252e-156
GSE83082.AEBP2.mESC_204	1120	443.696	0.138597	1.33586	158.781	1.65414e-159	157.054	8.8246e-158	155.041	9.10272e-156
GSE111820.CTCF.MEF_mut	1936	981.385	0.0260611	0.980188	158.695	2.01752e-159	156.969	1.07519e-157	154.955	1.11024e-155
GSE125116.SMAD3.EBs_Activin	2820	1623.57	0.055201	0.79653	158.565	2.7212e-159	156.839	1.44867e-157	154.825	1.49748e-155
GSE130599.CBFB.CD8-pos	2417	1326.15	0.0652573	0.865975	158.33	4.67392e-159	156.605	2.48561e-157	154.59	2.57206e-155
GSE87037.BRD4.retina_N-P7	2173	1150.03	0.0622993	0.918018	158.258	5.52475e-159	156.532	2.935e-157	154.517	3.04027e-155
GSE76303.CTCF.MEF_Rosa26	1605	756.04	0.0297162	1.08604	158.078	8.364e-159	156.353	4.43867e-157	154.337	4.60271e-155
GSE36673.KDM6B.NSC	1493	681.665	0.057607	1.13108	158.054	8.82596e-159	156.33	4.67892e-157	154.314	4.85693e-155
GSE90794.CBFB.thymocyte_CBFB1	2568	1438.02	0.0443263	0.836564	157.957	1.10483e-158	156.233	5.85092e-157	154.216	6.07988e-155
GSE133025.CREB1.kidney_PTH	2890	1678.27	0.0447265	0.784095	157.886	1.3015e-158	156.162	6.88522e-157	154.145	7.16215e-155
GSE104129.BRD4.liver_5AM	2463	1361.26	0.0545298	0.855479	157.806	1.56402e-158	156.083	8.26534e-157	154.065	8.60678e-155
GSE98412.JUNB.Th17	2132	1122.6	0.0369107	0.925364	157.536	2.90965e-158	155.814	1.53445e-156	153.796	1.60118e-154
GSE122715.SUZ12.mESC-E14_PCGF3-5-6-KO	1145	460.848	0.140612	1.31299	157.537	2.90685e-158	155.814	1.53458e-156	153.796	1.59964e-154
GSE121660.HDAC3.embryonic-cortical-culture_2kcl	2410	1323.66	0.0454777	0.864495	157.392	4.05653e-158	155.67	2.13705e-156	153.651	2.23231e-154
GSE99195.RAD21.primary-B-cell_activated	2536	1416.24	0.0343101	0.840486	157.333	4.6475e-158	155.612	2.44584e-156	153.592	2.55752e-154
GSE57807.TAF3.liver	3170	1892.7	0.0535527	0.744038	157.264	5.44119e-158	155.544	2.86056e-156	153.524	2.99429e-154
GSE53039.NCOA2.liver_ZT4	1965	1005.14	0.0453214	0.967126	157.245	5.68698e-158	155.525	2.98667e-156	153.505	3.12955e-154
GSE110896.MED1.hematopoietic-progenitor_LSD1i	1676	805.793	0.147821	1.05654	157.172	6.72398e-158	155.453	3.52761e-156	153.432	3.7002e-154
GSE57177.SMAD4.lung	2243	1203.44	0.048781	0.898263	157.054	8.83167e-158	155.335	4.62858e-156	153.313	4.86007e-154
GSE130822.ASCL2.colon-stem-cell_mCh-neg	2545	1423.95	0.0456617	0.837771	156.966	1.08244e-157	155.247	5.66709e-156	153.225	5.95669e-154
GSE88769.BRD4.mESC_JQ1	1174	479.619	0.227563	1.29147	156.948	1.12819e-157	155.229	5.90048e-156	153.207	6.20842e-154
GSE120894.SOX4.ENSC	1848	924.858	0.153018	0.998661	156.676	2.10993e-157	154.958	1.10236e-155	152.935	1.1611e-153
GSE61148.IKZF1.thymus_DN4	2278	1231.36	0.0756358	0.887521	156.07	8.50517e-157	154.353	4.43906e-155	152.33	4.6804e-153
GSE109712.BRD4.iPSC_RodFibr_F_Y-FNR07	1819	906.601	0.105842	1.00461	155.878	1.32331e-156	154.161	6.89958e-155	152.138	7.28219e-153
GSE135762.RNF2.mESC_UNC4219	2453	1359.63	0.0579796	0.851331	155.802	1.57807e-156	154.085	8.21936e-155	152.061	8.68411e-153
GSE59569.MED1.mESC_SNEL4	1681	812.549	0.0772838	1.04879	155.601	2.50795e-156	153.884	1.30492e-154	151.86	1.38013e-152
GSE56019.RORC.EL4	1671	805.964	0.0417844	1.05192	155.502	3.14815e-156	153.786	1.63635e-154	151.761	1.73243e-152
GSE126443.DMC1.testis_Ankrd31-KO	1789	887.002	0.0696732	1.01214	155.384	4.13262e-156	153.668	2.14585e-154	151.643	2.27418e-152
GSE109965.RUNX1.BMDM_B6	2128	1125.44	0.049073	0.919005	155.316	4.82951e-156	153.601	2.50513e-154	151.575	2.65768e-152
GSE104129.MED1.liver_5AM	2246	1210.42	0.0521077	0.891847	155.252	5.59552e-156	153.538	2.89949e-154	151.512	3.07921e-152
GSE55697.RNF2.mESC_treated	1252	531.329	0.0584965	1.23656	155.143	7.18996e-156	153.429	3.72189e-154	151.403	3.95663e-152
GSE103057.IRF4.small-pre-B_brwd1-KO	1708	831.998	0.176921	1.03766	155.116	7.65419e-156	153.403	3.95815e-154	151.376	4.2121e-152
ENCSR980YXJ.NRF1.CH12-LX	1636	783.085	0.134274	1.06293	155.106	7.83943e-156	153.393	4.0498e-154	151.365	4.31404e-152
GSE73531.YY1.pro-B-cell	1617	770.313	0.157864	1.0698	155.077	8.36953e-156	153.365	4.31923e-154	151.337	4.60575e-152
GSE31796.IRF3.BMDM_Dex_LPS	2157	1147.15	0.027327	0.910974	154.954	1.11183e-155	153.242	5.73193e-154	151.213	6.11839e-152
GSE80049.DPF2.mESC_dCD	971	360.343	0.169489	1.4301	154.937	1.15658e-155	153.225	5.95657e-154	151.196	6.36466e-152
GSE67476.IRF8.stomach_IFNg	913	327.364	0.247291	1.47972	154.481	3.30082e-155	152.77	1.69824e-153	150.741	1.81644e-151
GSE97859.OBOX1.MEF	912	326.901	0.211945	1.48018	154.396	4.0211e-155	152.685	2.06672e-153	150.655	2.21281e-151
GSE72084.CREB1.primary-hepatocyte_corticosterone	2623	1489.53	0.0468042	0.816358	154.33	4.6812e-155	152.619	2.40355e-153	150.589	2.57606e-151
GSE79813.PPARG.MSC_veh	2727	1567.28	0.0357789	0.79905	154.275	5.30957e-155	152.565	2.72342e-153	150.534	2.92186e-151
GSE76239.SMARCA4.heart_PBS	1258	536.616	0.206399	1.22917	154.267	5.40816e-155	152.557	2.77118e-153	150.526	2.97611e-151
GSE104155.BRD4.skeletal-muscle_cachexia	2293	1247.53	0.166909	0.878163	154.123	7.52532e-155	152.414	3.85212e-153	150.383	4.14118e-151
GSE41589.SUZ12.mESC	1645	792.154	0.0665642	1.05423	153.705	1.97324e-154	151.996	1.00905e-152	149.964	1.08587e-150
GSE107899.PPARG.preadipocyte	1505	698.446	0.105525	1.10754	153.542	2.87178e-154	151.834	1.46558e-152	149.801	1.58034e-150
GSE107899.PPARG.iWAT	1505	698.446	0.105525	1.10754	153.542	2.87178e-154	151.834	1.46706e-152	149.801	1.58034e-150
GSE120806.STAT1.aorta_VSMC_IFNg-LPS	2582	1461.99	0.0410983	0.820559	153.362	4.34796e-154	151.654	2.21669e-152	149.621	2.39268e-150
GSE111569.ETV5.alveolar-type-2-cell	3090	1844.9	0.0534982	0.744067	153.351	4.45894e-154	151.644	2.27099e-152	149.61	2.45376e-150
GSE40918.EP300.Th17_Batf-pos-pos	2216	1193.87	0.0419157	0.892318	153.348	4.49253e-154	151.641	2.28579e-152	149.607	2.47224e-150
GSE97869.CTCF.erythroid_D38	2195	1179.09	0.0441668	0.896553	153.207	6.20822e-154	151.501	3.15555e-152	149.466	3.41638e-150
GSE98662.RUNX1.thymus	2740	1580.85	0.051496	0.793473	153.047	8.97652e-154	151.341	4.55807e-152	149.306	4.93978e-150
GSE94688.TET3.mESC-E14_Trunc	2477	1386.31	0.076935	0.837348	152.68	2.08958e-153	150.975	1.05997e-151	148.939	1.14989e-149
GSE76478.CTCF.pre-B-cell_p3	2142	1142.69	0.0270537	0.906524	152.545	2.85098e-153	150.84	1.44476e-151	148.804	1.5689e-149
GSE111871.CBFB.lung	1575	747.386	0.12	1.07543	152.499	3.17319e-153	150.794	1.60643e-151	148.758	1.74621e-149
GSE90893.CEBPA.MEF	2284	1245.72	0.0477305	0.874584	152.403	3.95265e-153	150.699	1.99904e-151	148.663	2.17515e-149
GSE84518.MYC.BMDM_IL4-2h	2112	1121.71	0.126976	0.912912	152.337	4.60112e-153	150.634	2.32467e-151	148.597	2.53199e-149
GSE76303.STAG1.MEF	1288	559.258	0.0349146	1.20355	152.229	5.90632e-153	150.526	2.98113e-151	148.488	3.25025e-149
GSE121279.FOXP3.lymphocyte_Treg	1838	928.462	0.0947814	0.985221	152.132	7.37293e-153	150.43	3.71767e-151	148.392	4.05732e-149
GSE60699.HEY2.CM7-1_cardiomyocyte_Dox	1710	840.105	0.0911562	1.02536	152.054	8.8276e-153	150.352	4.44673e-151	148.314	4.85783e-149
GSE97869.CTCF.erythroid_D29	1705	836.743	0.047456	1.02691	152.023	9.47855e-153	150.321	4.76988e-151	148.283	5.21605e-149
GSE110950.ZFPM1.TSC_differentiated	890	317.46	0.052697	1.48723	151.934	1.16444e-152	150.233	5.85397e-151	148.193	6.40791e-149
GSE138005.CTCF.HSPC_BM_Stag2WT	2090	1107.07	0.0337249	0.916755	151.907	1.23975e-152	150.206	6.22641e-151	148.166	6.82237e-149
GSE99895.RELA.BMDM_15min	2064	1089.06	0.0681188	0.922365	151.686	2.06242e-152	149.985	1.03478e-150	147.945	1.13495e-148
GSE124741.RNF2.MEF_K27-OE	770	251.285	0.138415	1.61553	151.353	4.44053e-152	149.653	2.22575e-150	147.612	2.44363e-148
GSE60699.HEY1.CM7-1_cardiomyocyte_Dox	1731	856.9	0.0959534	1.01441	151.001	9.97622e-152	149.301	4.99547e-150	147.26	5.48991e-148
GSE121355.MED26.CH12	2081	1103.19	0.0715292	0.915596	150.918	1.20685e-151	149.219	6.03717e-150	147.178	6.64129e-148
GSE98404.SIN3A.MEF_D3	1304	571.929	0.230878	1.18904	150.879	1.32253e-151	149.18	6.60934e-150	147.138	7.2779e-148
GSE87820.SOX2.ZHBTc4_Dox-24h	1971	1025.08	0.0377138	0.943189	150.828	1.4863e-151	149.13	7.42042e-150	147.087	8.1791e-148
GSE86314.PGR.uterus	2264	1235.73	0.0324765	0.873507	150.75	1.77883e-151	149.052	8.87213e-150	147.009	9.7889e-148
GSE36620.TET2.bone-marrow	1300	570.146	0.0414052	1.18911	150.437	3.65263e-151	148.74	1.82e-149	146.697	2.01004e-147
GSE84328.LMO2.hematopoietic-progenitor	2382	1323.11	0.042738	0.848245	150.357	4.39706e-151	148.66	2.18877e-149	146.616	2.4197e-147
GSE51513.RUNX2.MC3T3-E1_POB	2641	1515.34	0.0358204	0.801445	150.278	5.27263e-151	148.581	2.62203e-149	146.537	2.90153e-147
GSE75186.RUNX1.EML	2070	1097.1	0.0656976	0.91594	150.231	5.87355e-151	148.535	2.918e-149	146.49	3.23222e-147
GSE42466.SUZ12.mESC	1337	594.637	0.0860084	1.16892	150.118	7.61734e-151	148.422	3.7806e-149	146.378	4.19182e-147
GSE23943.SUZ12.mESC_2I	1352	604.392	0.0800379	1.16154	150.114	7.69696e-151	148.418	3.81637e-149	146.373	4.23564e-147
GSE102517.KLF4.MEF_d2	1095	441.715	0.157986	1.30974	150.1	7.94516e-151	148.405	3.93558e-149	146.359	4.37222e-147
GSE63778.SMC3.Th17	1088	437.534	0.0340596	1.31421	150.028	9.36503e-151	148.334	4.63436e-149	146.288	5.15358e-147
GSE48122.JARID2.mESC_Rest-KO	1278	556.842	0.0734905	1.19855	149.972	1.06746e-150	148.278	5.27726e-149	146.231	5.87424e-147
GSE99895.ATF3.BMDM_30min	2419	1352.02	0.0515712	0.839296	149.773	1.6869e-150	148.079	8.33149e-149	146.032	9.28304e-147
GSE94688.TET3.mESC-E14	2303	1267.17	0.0895064	0.861908	149.674	2.12005e-150	147.98	1.04605e-148	145.933	1.16666e-146
GSE56098.OTX2.mESC_DOX	1538	728.922	0.0413552	1.07722	149.396	4.018e-150	147.703	1.98059e-148	145.655	2.2111e-146
GSE109131.NELFE.BMDM_LPS-0h	2191	1186.62	0.155932	0.884733	149.332	4.65267e-150	147.64	2.2912e-148	145.592	2.56036e-146
GSE74055.RAD21.mESC_dCas9	1785	898.173	0.0321326	0.990858	149.303	4.97992e-150	147.611	2.44997e-148	145.562	2.74045e-146
GSE49766.CHD4.MEF_DOX-4d	1334	594.286	0.116659	1.16653	149.252	5.59909e-150	147.56	2.75191e-148	145.511	3.08118e-146
GSE99895.RELA.BMDM_30min	2144	1153.92	0.0571855	0.893765	148.855	1.39635e-149	147.164	6.85631e-148	145.114	7.68414e-146
GSE105006.BAP1.mESC_KO	1508	710.122	0.200933	1.0865	148.745	1.79912e-149	147.054	8.82536e-148	145.004	9.90053e-146
GSE117287.SIN3A.mESC	2753	1604.64	0.0638244	0.778758	148.631	2.3375e-149	146.941	1.14552e-147	144.891	1.28632e-145
GSE83863.TEAD.liver	2304	1271.73	0.0382623	0.857351	148.316	4.82949e-149	146.626	2.36446e-147	144.575	2.65767e-145
GSE99895.RELA.BMDM_1h_Irf3-KO	2105	1127.52	0.0475835	0.900667	148.209	6.17355e-149	146.52	3.01958e-147	144.469	3.3973e-145
GSE110896.MED1.hematopoietic-progenitor_IBET	1832	933.679	0.108582	0.972421	148.156	6.9771e-149	146.467	3.40931e-147	144.416	3.8395e-145
GSE74536.MED1.AML_RN2	2274	1250.34	0.0345898	0.86291	148.121	7.57428e-149	146.432	3.69754e-147	144.38	4.16812e-145
GSE110896.BRD4.hematopoietic-progenitor_IBET	2229	1217.63	0.101088	0.872326	148.086	8.19728e-149	146.398	3.99782e-147	144.346	4.51097e-145
GSE95113.RAD21.AML12	2214	1207.19	0.0428464	0.875	147.913	1.22204e-148	146.226	5.94843e-147	144.172	6.7249e-145
GSE76473.KLF4.bone-marrow	1825	929.358	0.154832	0.97359	147.913	1.22185e-148	146.225	5.95321e-147	144.172	6.72382e-145
GSE121438.STAT5.mammary-gland_delE-wTbrg4	2770	1620.46	0.044374	0.773483	147.704	1.97631e-148	146.017	9.61064e-147	143.964	1.08756e-144
GSE94130.BRD4.AT-3_JQ1	1043	413.82	0.224833	1.33366	147.578	2.64241e-148	145.892	1.28375e-146	143.837	1.45412e-144
GSE58407.EP300.mESC_dR-cell	758	249.052	0.099085	1.60575	147.519	3.02882e-148	145.833	1.47007e-146	143.778	1.66676e-144
GSE87037.BRD4.retina_N-P0	2479	1403.22	0.045108	0.821017	147.463	3.4415e-148	145.778	1.66876e-146	143.723	1.89386e-144
GSE99195.TOP2B.primary-B-cell_activated_12h	2248	1234.39	0.0490915	0.864848	147.04	9.12975e-148	145.354	4.42273e-146	143.299	5.0241e-144
GSE94688.TET3.mESC-E14_CXXC	2442	1377.52	0.0796815	0.825989	146.882	1.31335e-147	145.197	6.35616e-146	143.141	7.22735e-144
GSE99319.RELA.T-cell_Tconv	1160	487.321	0.226784	1.25118	146.837	1.45454e-147	145.153	7.03275e-146	143.097	8.00432e-144
GSE94300.JARID2.mESC_MTF2-GT	1184	502.588	0.0510895	1.23622	146.749	1.78183e-147	145.065	8.60699e-146	143.009	9.80541e-144
GSE99895.RELA.BMDM_15min_Irf3-KO	1796	912.369	0.0717281	0.977098	146.525	2.98394e-147	144.842	1.43999e-145	142.785	1.64206e-143
GSE104027.NR1H2.iBMDM	2012	1065.62	0.0599702	0.916936	146.356	4.40506e-147	144.673	2.12377e-145	142.615	2.42411e-143
GSE78899.RNF2.mESC	774	259.288	0.188551	1.57778	146.224	5.97194e-147	144.541	2.87646e-145	142.483	3.28636e-143
GSE82144.WDR5.B-cell_activated	2498	1422.06	0.0619544	0.81279	145.899	1.26055e-146	144.217	6.06583e-145	142.159	6.93682e-143
GSE94737.ESR1.uterus_E2-1h	2483	1411.22	0.0428	0.815145	145.795	1.60477e-146	144.113	7.71487e-145	142.054	8.83104e-143
GSE67580.SUZ12.mESC_RH	775	260.337	0.145979	1.57381	145.794	1.60669e-146	144.113	7.71677e-145	142.053	8.84162e-143
GSE90752.GATA3.mESC_TSC	989	383.902	0.0524474	1.36523	145.76	1.73742e-146	144.079	8.33672e-145	142.019	9.56101e-143
GSE99895.RELA.BMDM_30min_Irf3-KO	2052	1095.94	0.05032	0.904867	145.732	1.85271e-146	144.052	8.8815e-145	141.992	1.01954e-142
GSE135423.RXRA-B.liver_ZT02	2241	1233.04	0.0652402	0.861924	145.697	2.00937e-146	144.017	9.6234e-145	141.956	1.10576e-142
GSE134387.CTNNB1.mESC_armadillo-repeat	1456	681.905	0.0815961	1.09437	145.513	3.07233e-146	143.833	1.47003e-144	141.772	1.6907e-142
GSE115368.STAT5A.mammary-gland_L10	2759	1619.32	0.0346499	0.768757	145.496	3.19148e-146	143.817	1.52559e-144	141.755	1.75627e-142
ENCSR906QEK.TCF12.CH12-LX	1976	1042.11	0.0768782	0.923071	145.494	3.20954e-146	143.815	1.53278e-144	141.753	1.76621e-142
GSE83082.SUZ12.mESC_KO	1165	493.256	0.0666438	1.23992	145.173	6.71479e-146	143.494	3.20375e-144	141.432	3.69515e-142
GSE60353.EP300.Th1_DN	2262	1249.97	0.0900621	0.855702	145.141	7.22835e-146	143.463	3.44553e-144	141.4	3.97776e-142
GSE123630.SUZ12.forelimb_distal	973	375.432	0.0896609	1.37389	144.991	1.02191e-145	143.313	4.86656e-144	141.25	5.6236e-142
GSE75786.ASXL1.MSC	1916	1000.75	0.0703507	0.937022	144.962	1.09139e-145	143.285	5.19255e-144	141.221	6.00594e-142
GSE89743.FOXP3.Treg	2388	1343.26	0.0344629	0.830061	144.954	1.11267e-145	143.277	5.28878e-144	141.213	6.12301e-142
GSE50934.KDM1A.3T3-L1_d7	1131	472.358	0.15078	1.25965	144.892	1.28112e-145	143.216	6.08376e-144	141.152	7.05e-142
GSE90893.POU5F1.MEF_OSKpMX	2596	1499.29	0.0368991	0.79201	144.612	2.44519e-145	142.936	1.16008e-143	140.871	1.34559e-141
GSE82144.KMT2A.B-cell_resting	2351	1317.29	0.0772745	0.835704	144.49	3.23267e-145	142.815	1.53225e-143	140.75	1.77894e-141
GSE116603.SUZ12.mESC_EZh2Y726D	1202	518.386	0.155538	1.21334	144.203	6.27001e-145	142.527	2.96913e-143	140.462	3.45039e-141
GSE62482.BRD4.Th1_TBX21-KO	1386	638.296	0.0348023	1.11863	144.039	9.14055e-145	142.364	4.3244e-143	140.298	5.03004e-141
GSE53362.EP300.pre-B-cell_12h	2102	1136.78	0.082629	0.886804	143.941	1.1452e-144	142.267	5.41287e-143	140.201	6.30201e-141
GSE117488.CLOCK.liver_LPS	1714	861.69	0.0610095	0.992126	143.762	1.73105e-144	142.088	8.17432e-143	140.021	9.52596e-141
GSE100962.TRP53.BMDM_2h	1385	638.245	0.0902045	1.1177	143.728	1.87072e-144	142.054	8.82565e-143	139.987	1.02946e-140
GSE129478.RAD21.HPC-7_Myelo_Luc	1771	901.925	0.0338255	0.973484	143.562	2.74331e-144	141.888	1.29302e-142	139.821	1.50964e-140
GSE51531.STAT1.spleen	2042	1094.48	0.0859645	0.899733	143.56	2.75366e-144	141.887	1.29669e-142	139.819	1.51534e-140
GSE61148.SUZ12.thymus_EtOH	748	248.205	0.144765	1.5915	143.443	3.60639e-144	141.77	1.69667e-142	139.702	1.9846e-140
GSE104905.ESRRG.kidney	1822	938.073	0.0453945	0.95775	143.424	3.769e-144	141.752	1.77152e-142	139.683	2.07408e-140
GSE102517.MYC.MEF_d1	908	339.206	0.234686	1.42053	143.361	4.3566e-144	141.689	2.0458e-142	139.62	2.39744e-140
GSE90635.SATB1.CD4	1573	765.696	0.0966394	1.03867	143.247	5.65921e-144	141.576	2.65503e-142	139.507	3.11426e-140
ENCSR000ERE.MXI1.CH12-LX	1898	992.573	0.109768	0.935235	143.129	7.43673e-144	141.458	3.48572e-142	139.388	4.09243e-140
GSE41314.EZH2.mESC	932	353.837	0.13362	1.39724	143.016	9.63487e-144	141.346	4.51184e-142	139.276	5.30207e-140
GSE115340.SMC1A.mESC_siCtrl	1457	687.877	0.0291639	1.08278	142.912	1.22444e-143	141.242	5.72852e-142	139.171	6.73808e-140
GSE110305.REST.bone-marrow_shctrl	2167	1186.91	0.105332	0.868485	142.879	1.32081e-143	141.209	6.17369e-142	139.139	7.26842e-140
GSE120806.RELA.aorta_VSMC_LPS	1963	1039.82	0.0321635	0.916729	142.777	1.66973e-143	141.108	7.79739e-142	139.037	9.18852e-140
[truncated: 4,430 more rows]

## Sheet: Data S6
Data S6. Enrichment of transcriptional regulator binding sites for Dnmt1tet/tet hypomethylated promoter DMRs using the mouse ReMap ChIP-seq catalog (related to Figure 4)
[truncated: 5,504 more rows]

[truncated: 1 more sheets: Data S7]
